# Supplementary material for: The Arabidopsis thaliana mobilome and its impact at the species level
Source: eLife journal article supplement (doi:10.7554/elife.15716), 2016-06-03
Supplement: supp [file elife-15716-supp-v1.zip]

Archive with 21 entries (21 files):
- elife_poa_e15716_Supplementary_File_1.pdf
- elife_poa_e15716_Figure_1_figure_supplement_2.pdf
- elife_poa_e15716_Supplementary_File_4.xlsx
- elife_poa_e15716_Figure_3_figure_supplement_1.pdf
- elife_poa_e15716_Figure_3_figure_supplement_3.pdf
- elife_poa_e15716_Figure_2_source_data_1.xlsx
- elife_poa_e15716_Figure_4_figure_supplement_1.pdf
- elife_poa_e15716_Figure_3_figure_supplement_4.pdf
- elife_poa_e15716_Figure_3_figure_supplement_2.pdf
- elife_poa_e15716_Figure_2_figure_supplement_1.pdf
- elife_poa_e15716_Figure_1_source_data_1.xlsx
- elife_poa_e15716_Figure_1_source_data_2.xlsx
- elife_poa_e15716_Figure_2_figure_supplement_3.pdf
- elife_poa_e15716_Figure_5_figure_supplement_1.pdf
- elife_poa_e15716_Supplementary_File_3.xlsx
- elife_poa_e15716_Figure_1_figure_supplement_1.pdf
- elife_poa_e15716_Figure_2_figure_supplement_2.pdf
- elife_poa_e15716_Supplementary_File_2.pdf
- elife_poa_e15716_Figure_1_source_data_4.xlsx
- elife_poa_e15716_Figure_1_source_data_3.pdf
- elife_poa_e15716_Supplementary_File_5.txt
