# Supplementary material for: The Arabidopsis thaliana mobilome and its impact at the species level
Source: eLife journal article supplement (doi:10.7554/elife.15716), 2016-06-03
Supplement: supp [file elife-15716-supp-v1.zip › elife_poa_e15716_Figure_1_source_data_1.xlsx]

## Sheet: A
CNV?	TE FAMILY	Col-0a	Col-0b	Aa-0	Abd-0	Ag-0	Ak-1	Alst-1	Altai-5	Amel-1	An-1	Ang-0	Anholt-1	Ann-1	Anz-0	Appt-1	Ba-1	Baa-1	Bch-1	Bd-0	Benk-1	Ber	Bik-1	Bl-1	Bla-1	Boot-1	Bor-1	Bor-4	Br-0	Bs-1	Bsch-0	Bu-0	Buckhorn-Pass	Ca-0	Cal-0	Cerv-1	Chat-1	Chi-0	CIBC-17	CIBC-5	Cnt-1	Co_1	Com_1	Co	Cvi_0	Da1-12	Db-1	Di-G-0	Dja-1
YES	ARNOLD1	1.20506	1.3052	1.07746	0.531435	1.38388	0.444229	1.11098	0.61088	0.629346	0.582163	0.288915	0.517517	0.613088	0.278403	1.02449	0.383629	1.39581	0.819946	0.601519	0.446132	0.587721	0.683274	0.600938	0.951302	0.795646	0.436181	0.446347	0.721743	0.361825	0.554746	0.589648	1.35881	0.433744	0.639358	0.488575	0.521269	0.702019	0.363072	0.916791	0.48916	0.944627	0.934055	0.397603	0.462002	0.289932	1.06701	0.531573	0.999895
YES	ARNOLD2	7.41304	7.98284	7.76409	3.82002	8.17432	4.59794	6.05096	4.95429	4.34383	6.74851	3.03286	4.56242	5.18324	2.7004	6.8975	2.98356	3.96407	5.82267	3.47124	5.4394	4.5428	5.83811	4.45575	6.85577	5.58062	3.48143	3.6788	7.67169	5.62567	5.54068	5.04343	7.8449	4.57534	5.95762	6.3341	4.00278	7.01023	3.37956	4.41469	2.57385	4.692	5.42569	4.09333	3.67293	2.74388	5.50338	6.52044	7.02355
NO	ARNOLD3	7.83585	8.18199	7.59953	4.65089	8.13853	8.10191	7.22933	5.84169	6.19413	8.15664	7.19351	6.92743	8.67228	8.03241	6.43873	6.89178	5.28017	6.13499	7.31247	7.56732	6.96378	5.98197	6.99051	6.89713	6.50756	7.65139	7.91212	6.58637	7.08284	6.81691	7.82936	9.25161	6.61582	9.04581	5.09642	5.16394	8.53975	5.16439	6.62135	5.32503	8.13852	6.70647	6.73697	6.62008	6.75412	7.71835	5.87308	6.13939
YES	ARNOLD4	1.11155	1.19203	1.23622	1.27516	1.39578	1.30795	1.22159	0.944169	0.809866	1.92913	1.33662	1.4015	1.5601	1.31196	1.33079	1.22869	1.28915	1.14987	1.11605	1.31321	1.02438	1.15167	1.0009	1.55081	1.61985	1.71837	0.871645	1.59396	1.21808	1.56947	1.50878	1.58257	1.5478	1.65383	1.1738	1.40262	0.971006	1.31885	1.26804	1.00485	1.42396	1.57962	1.35057	1.53454	1.04075	1.31353	1.06006	1.02435
YES	ARNOLDY1	49.2897	50.3116	33.0401	34.5149	53.5146	26.5661	24.7807	35.4822	25.4394	25.413	26.9985	24.2303	23.4475	41.9343	38.622	45.2731	45.4613	32.0465	28.7027	37.0662	24.6624	26.037	33.7581	44.5388	39.1804	37.0091	35.1599	35.0747	36.2452	36.8956	36.6998	59.8137	32.8147	34.3298	38.526	26.2351	33.935	55.8146	42.8869	35.4871	39.7325	26.9099	52.5082	63.7131	23.9663	41.0716	27.7223	24.9803
NO	ARNOLDY2	87.862	87.6921	50.7707	58.093	106.811	41.8221	48.1447	61.7807	39.4416	42.6165	44.8097	36.5269	35.853	60.6515	69.2363	71.0654	90.233	51.2993	42.2953	67.1672	41.4314	41.3601	58.0154	67.4953	69.6506	62.3402	63.5167	59.4017	63.8589	59.2886	56.9559	92.9418	55.8777	58.6585	57.6029	37.0637	62.7537	101.362	69.7953	59.23	58.5383	40.4855	86.4658	106.928	37.701	68.8168	47.7058	40.6769
YES	AT9MU1	3.55236	3.6197	2.71231	2.9758	2.77382	3.8476	2.08348	3.41064	1.4413	3.16367	2.0645	5.64754	1.23033	4.19823	2.8691	3.96926	5.78714	2.33515	2.08083	3.19436	2.1026	4.93966	1.90836	5.75499	3.1021	2.35705	2.07025	1.33754	3.46416	3.11023	2.88458	3.34607	2.11	6.9629	4.55038	2.26787	1.92215	2.23553	6.52387	4.00304	2.80614	2.2096	2.97085	3.08954	3.37396	3.66031	3.56743	1.9703
YES	AT9NMU1	14.6059	15.1323	10.12	13.9156	10.3555	9.66434	8.08064	9.83384	12.2884	7.30469	10.8813	6.6896	8.78134	6.47337	17.5815	13.4511	14.566	10.2084	13.7965	11.4952	8.37629	9.10876	8.87274	12.66	10.4799	14.9505	14.1062	10.0837	11.0456	7.64083	12.9233	10.7784	7.30215	15.3042	7.6253	9.75363	5.71041	11.9502	8.33864	6.2333	7.82515	8.96887	7.61288	14.7185	15.9589	9.75564	12.6612	6.56372
YES	AT9TSD1	11.419	11.3853	8.12826	8.03816	11.03	6.13026	7.19017	8.06795	7.4374	6.12909	8.27246	7.18449	7.07393	8.83052	6.52194	8.82319	13.8066	7.89417	6.86584	7.36322	5.82598	9.46789	6.37996	10.7309	8.1141	8.59057	9.46681	7.04195	9.4419	7.75821	7.42495	12.4576	7.86128	9.29205	9.63477	6.68109	7.91225	11.7594	8.49329	8.5445	10.8293	6.84197	11.8417	15.854	6.93489	9.51178	7.09962	6.36447
YES	ATCOPIA1	3.23323	3.02996	2.85065	3.21678	2.54325	3.20077	3.4646	2.91842	2.97267	3.02765	3.09132	3.2335	3.2818	2.83692	3.59639	2.58756	3.04104	3.09839	3.09316	2.99964	2.93061	3.03855	2.52555	2.8416	3.91883	2.91498	1.68409	2.84201	2.75861	2.97305	2.64704	2.74311	2.77963	2.69894	2.93346	4.88117	3.16495	3.09191	3.50874	3.13467	3.0853	3.4611	3.1982	3.40469	1.55765	2.63053	3.10642	4.78181
YES	ATCOPIA10	4.20878	3.96994	3.06293	5.83325	5.82042	6.32781	6.2219	5.84256	7.30235	5.12164	1.65808	6.33152	7.52372	6.19794	8.73659	4.11143	3.92182	8.10748	3.05212	2.96972	9.32949	6.24855	8.43815	5.44833	4.06158	4.41147	7.63717	3.02101	1.51366	7.30789	7.85191	4.43039	5.61376	5.43279	6.08278	5.69895	8.88308	3.74096	7.18039	1.68244	6.07869	7.36408	8.58788	1.63756	8.71665	5.3485	6.15116	8.14458
YES	ATCOPIA11	2.0673	1.94113	0.0367778	1.5025	1.998	2.99272	0.0764292	1.4922	1.42986	6.10815	2.61401	1.69291	0.514968	0.668439	1.44734	1.25232	1.29992	1.52336	0.0440976	1.28073	0.0864653	3.13307	0.0683938	1.35281	1.33961	0.0631745	0.84946	0.0715332	0.0358214	1.47471	3.58044	2.35339	2.63476	2.82312	0.0274553	3.18229	1.57251	2.43634	0.92747	1.47776	1.52339	3.17852	1.27093	3.26109	0.019296	2.45227	3.1535	1.71894
YES	ATCOPIA12	3.7881	3.8265	6.05138	7.88636	5.42481	6.7056	8.71424	5.20255	6.73245	6.55107	4.99564	6.56393	3.51157	5.99629	5.09583	5.94073	5.16992	4.29788	5.17246	3.24518	5.48143	4.97039	4.7842	3.62797	5.4156	3.12154	4.18086	4.57448	6.04088	4.75428	5.82953	4.8963	5.66031	4.50124	3.16557	3.57065	4.76576	8.21671	8.71217	8.28707	6.27964	9.18185	3.98993	3.74317	5.22501	2.65504	7.20813	6.78023
YES	ATCOPIA13	6.34844	6.28929	6.2593	4.64339	5.5053	4.84945	8.99347	4.29098	3.08258	5.43295	6.60245	9.03532	10.3252	5.91315	6.96939	3.78692	3.68284	9.04024	6.76451	6.80025	3.80401	7.70741	3.36792	5.53424	4.05003	7.18357	7.89602	4.63213	7.8373	4.3651	9.0914	4.83185	4.20191	4.60137	6.33444	5.53934	7.98404	3.93521	5.58855	6.80719	7.33867	5.65004	4.69745	4.13479	6.6118	5.21389	10.2313	5.60176
YES	ATCOPIA14	1.01551	0.985213	1.46219	0.00723931	1.02438	0.00943857	1.62275	0.00908965	0.0115759	1.46844	0.00872161	1.68607	1.75835	0.00252786	0.0105288	1.17009	0.00482323	0.010775	1.30679	1.35346	0.00565632	2.04899	0.00721737	0.00851128	1.21453	1.38221	1.28802	0.00994847	0.00783292	1.47501	1.35193	0.0103567	0.00963	1.48095	1.6017	1.66406	1.35361	0.0130025	1.50854	0.00558769	1.56755	0.0421365	1.3281	1.46307	0.011064	0.00995456	0.00731855	0.0111811
YES	ATCOPIA15	3.26104	3.34195	3.05565	3.01141	3.44106	3.09893	4.84444	3.52894	3.17875	3.10463	4.5293	3.19106	5.38836	3.01439	2.64877	2.50665	2.98506	2.90055	3.085	2.89168	4.88336	3.12821	4.1922	4.18469	4.16987	4.64422	2.7423	4.54995	1.93377	4.00722	2.80941	2.79279	4.60963	2.78132	3.99481	3.29353	2.84973	2.96377	4.65591	2.99739	4.43648	3.28725	1.85534	3.62053	4.89211	2.63681	3.09235	3.40706
YES	ATCOPIA16	3.22809	2.93077	4.28157	1.46492	3.39013	0.0316133	1.49881	2.10642	0.543526	3.13407	3.59009	1.48506	2.69097	4.43456	2.70067	1.35929	1.45948	1.39744	3.16894	2.82332	3.55447	3.38262	3.1478	4.40466	1.83646	2.84096	3.08505	0.493064	3.33642	1.97943	2.70327	2.77014	4.17842	2.01346	2.1143	1.69294	3.28272	1.46154	2.78649	4.66228	3.65569	3.66463	3.79345	1.51335	5.28369	2.76021	3.29361	1.82448
YES	ATCOPIA17	3.26094	2.98435	1.47067	2.93846	1.2719	3.20796	3.22697	1.56171	3.01129	4.81882	3.02817	1.58982	5.30854	2.96861	2.63881	1.39759	2.73825	2.94388	1.58115	2.61407	1.67338	3.14555	1.4499	2.72931	4.06253	2.82597	1.42836	2.97604	2.76625	2.81303	1.43441	2.33293	2.84074	2.98972	4.52043	1.6418	1.43789	1.28301	3.90234	2.84717	2.75726	3.19125	2.53926	2.7426	1.54915	1.38509	3.33782	1.85756
YES	ATCOPIA18	1.09418	1.00305	1.70059	1.58324	1.18699	1.59481	1.51755	1.69928	1.63585	1.67194	1.59641	1.60685	1.84565	1.68028	1.52049	1.32582	1.39014	1.5957	1.59576	1.48049	0.0351904	1.66358	0.0308083	1.38352	1.47799	1.55371	1.41481	1.63614	1.57541	1.42322	1.55165	1.41928	1.38686	1.55906	1.46907	1.82481	1.49553	1.33663	1.50297	1.56392	1.61721	1.74794	1.46019	1.27132	1.67741	1.36012	1.64668	1.81562
YES	ATCOPIA18A	0.981166	0.920164	1.40698	1.4491	1.1542	1.5753	1.54593	0.000647072	1.51749	1.45351	1.73062	1.57774	3.64123	1.47095	1.3131	1.23094	1.2275	1.44887	1.57059	1.45788	1.56668	1.6454	1.43217	1.32033	1.38044	1.43109	1.31164	1.47118	1.4618	1.42505	1.47791	1.2354	1.23831	1.56355	1.54126	1.65864	1.48749	1.34596	1.46382	1.58232	1.42724	1.54519	1.2422	2.27047	1.5572	1.36229	1.59221	0.00219739
YES	ATCOPIA19	1.01455	0.968581	1.61082	1.49531	1.20146	1.66044	1.6403	1.59644	1.70549	1.70271	1.55342	1.66852	1.88526	1.55185	1.34723	1.22277	1.30684	1.52507	1.64603	1.46501	1.66698	1.75395	1.50943	1.35534	1.01914	1.49652	1.42377	1.47152	1.44237	1.42471	1.40482	1.21535	1.52152	1.49855	1.62191	1.56428	1.52269	1.30749	1.5106	1.64835	1.60045	1.71525	1.15929	1.20962	1.78322	1.33401	1.74716	1.89086
YES	ATCOPIA2	1.04792	1.00234	1.5461	1.45399	1.1243	0.00140113	0.00136732	5.02893	1.8471	1.95155	3.0617	3.98295	2.41755	1.67234	2.64048	0.168629	3.68027	1.753	1.01402	0.0017529	1.43909	5.82221	1.29648	0.00529428	1.36245	1.3717	2.77654	0.00142097	2.31062	3.30266	1.46532	2.07136	1.67529	3.22475	1.62946	1.99565	0.00062634	1.23468	0.97472	0.00239149	3.44719	0.00187142	0.00739659	0.00846989	1.87146	2.71688	3.66778	6.07814
YES	ATCOPIA20	1.68875	1.80842	0.917565	1.3934	0.303131	0.433902	1.93773	1.91282	2.64108	1.80078	1.32205	0.00419871	0.817162	0.39783	1.9696	0.705507	1.27783	1.71402	0.756239	1.39153	2.899	1.29413	2.84159	0.00145164	2.17364	2.75304	2.30016	1.98339	1.25787	1.70985	1.29135	2.20406	2.07223	3.18963	1.82146	1.28842	3.56319	1.37329	0.628702	2.14985	0.547131	3.95577	1.9812	0.723458	1.53779	0.937487	2.40699	2.29776
YES	ATCOPIA21	0.906502	0.94367	0.00327064	3.06187	0.00849758	0.00565842	1.84481	0.00236025	0.542219	0.00153977	0.00165184	0.00460723	0.00788675	0.00995847	1.26578	1.2702	1.21549	5.38235	1.26961	3.05833	1.87044	0.00222648	1.60411	2.73721	1.27074	0.0563242	2.94163	0.00463259	0.017167	0.00195056	1.52652	0.0166287	3.04212	5.15362	0.803449	0.00852039	1.66859	1.03032	2.7676	1.79745	1.72098	0.00262484	0.0168846	0.0339516	0.0010734	0.00918901	0.00313366	2.09254
YES	ATCOPIA22	6.0114	6.05069	3.17083	4.58892	1.26058	3.25009	4.83729	0.0191534	1.74571	1.7368	1.58345	5.20314	0.0225726	0.020706	1.33208	2.52454	3.87046	3.20631	6.52353	4.19964	3.31041	1.82667	2.98654	1.32841	4.06893	0.190331	4.15447	3.09113	1.47209	1.536	1.43856	2.20583	4.27502	1.63845	0.0152108	5.29934	0.0105921	2.33714	1.92921	4.64961	1.56027	3.36939	3.38886	2.07807	0.0177145	1.38955	1.72984	3.4124
YES	ATCOPIA23	4.34192	4.1715	6.06352	6.10088	2.60322	1.76021	4.9738	1.49949	2.54578	7.10661	4.67928	6.77088	7.40472	1.526	1.16504	2.48945	3.15155	4.88111	3.15658	2.80361	1.38034	1.4923	1.2352	1.17249	1.34852	2.61459	0.741668	1.51627	3.6515	1.50343	7.51985	3.67993	2.99182	5.85252	3.88131	5.03926	1.2872	1.39736	2.66061	4.91975	1.69229	3.01773	2.56148	3.03799	4.95847	2.02331	5.13047	7.01307
YES	ATCOPIA24	1.17496	0.996727	1.44885	1.74909	1.56939	1.56951	1.62976	1.50001	1.38306	1.55185	1.58369	1.52832	1.86289	1.48516	1.31919	1.28679	1.35372	1.50113	1.51641	1.34348	1.46179	1.52204	1.3683	1.66298	1.22818	1.4748	1.31718	1.46393	1.75278	1.34137	1.48462	1.41593	1.33328	1.41502	1.49755	1.54182	1.36116	1.69362	1.70305	1.84899	1.41359	1.52904	1.4264	1.70359	1.63467	1.34406	1.57958	1.7616
YES	ATCOPIA25	1.04218	0.963852	1.54561	1.52904	0.00902681	1.59411	1.60401	0.00489259	0.00416381	1.70194	1.49002	0.00349333	0.00877937	0.00774683	0.00366645	0.00471369	0.00509033	1.55252	0.00373282	1.45277	1.61931	0.00353655	1.48448	0.00427163	1.32505	0.0635025	0.00357675	0.00514791	2.81701	0.00481805	0.00480736	0.00739535	0.00254392	0.00505391	1.53582	0.00536098	0.00424232	1.2302	0.535768	0.00386877	0.00739988	0.00265812	0.0111882	0.00645399	0.00468319	0.00389567	0.00894481	0.00540261
YES	ATCOPIA26	3.38609	3.47035	1.59744	1.48896	1.02881	0.0207457	1.70092	1.70589	3.43495	3.54515	0.0140637	1.59408	2.00882	1.64653	1.32586	1.24816	0.0186135	1.60277	1.65822	1.55937	3.60298	1.74735	3.16241	1.39352	2.82256	1.53383	0.029537	1.56653	1.5677	3.167	1.50195	1.35161	1.42642	1.66848	1.58867	1.82667	1.56811	1.61269	2.81503	1.70056	3.43294	1.81949	2.59816	1.32309	1.75022	1.369	1.85358	1.91924
YES	ATCOPIA27	6.46854	6.73154	8.77103	4.07469	3.57406	6.31305	3.1268	8.20396	6.29127	3.1816	10.5561	8.25867	3.5378	6.28411	2.91812	6.05125	7.27216	5.91669	11.4679	5.33062	9.59734	8.0014	8.9073	2.501	4.13703	5.20284	9.53906	3.32578	2.73156	7.13414	8.32864	2.68834	4.51491	5.88238	5.52678	9.68906	3.61629	6.1854	5.21299	4.59874	3.09098	4.71721	3.54249	4.55461	6.46822	7.72275	8.43033	6.94395
YES	ATCOPIA28	2.16021	2.02417	3.75136	2.477	5.03551	4.39355	4.28607	6.37138	5.87365	3.89629	5.42667	7.47133	7.08119	4.15603	5.69331	2.24488	1.22519	6.58743	6.70682	4.79702	4.54149	8.40343	4.29488	6.30967	3.32278	5.79429	4.21753	5.52288	3.34915	4.96093	6.27866	2.75656	5.56933	2.94128	1.94196	4.25569	10.4355	5.4314	5.91252	2.18504	5.6272	1.8025	2.89114	5.82339	5.21064	4.52191	5.80757	7.94364
YES	ATCOPIA29	4.02429	3.84658	1.93599	3.28892	7.2451	3.02879	3.95512	5.14506	4.42291	4.13664	4.23337	6.55306	5.21507	3.93667	4.22378	4.38578	2.39717	6.09761	6.09436	4.62412	5.72631	4.99053	5.42259	5.32598	2.85618	6.02781	6.31078	2.57153	3.29554	6.4871	6.51997	3.12797	5.52932	4.54112	1.58379	4.03162	5.43657	5.8072	4.75848	3.34497	4.59431	2.7559	5.01907	5.54859	4.27823	5.42216	4.28942	6.02104
YES	ATCOPIA3	1.02506	0.960137	1.63081	0.00134133	2.91544	5.26614	0.00395837	0	0.00122215	1.11361	0.00461904	3.74563	2.17883	3.15896	1.28339	2.04171	0.00401464	1.69259	0.00581377	0.000573697	1.92285	1.92572	1.7017	0.952298	2.29725	1.54396	0.0115366	3.18122	0.00440455	2.42204	3.46943	0.00292879	0.0129876	1.63672	0.0111567	3.73221	1.62313	1.14415	1.10034	1.70128	0.0138069	1.81976	1.65041	0.00580226	1.98531	2.3537	0.000643599	5.41318
YES	ATCOPIA30	0.977868	0.939637	1.12726	1.19667	1.22155	1.0529	1.10421	1.10242	0.85113	1.03855	1.04461	1.0261	1.00651	1.12567	1.18512	0.805215	1.16957	1.13009	1.17491	1.06527	1.07239	0.914821	1.07792	1.19975	1.16943	1.05241	0.941706	1.14299	0.900525	0.871838	1.04713	1.14051	1.06554	1.12383	1.12767	1.05857	1.07741	1.25987	1.18912	1.0797	1.09948	1.12265	1.1152	1.29955	0.877567	1.02458	1.0819	1.05902
YES	ATCOPIA31	2.58849	2.74615	1.63405	0.0115921	0.0201039	0.154483	0.00825984	4.91537	3.5023	0.133233	3.347	3.63931	0.220166	0.0815315	0.144567	2.55623	2.80984	0.011632	4.99248	0.14069	1.90348	3.59952	1.69044	3.04905	1.49159	1.53377	1.38317	0.0141213	2.94131	0.00973985	1.65579	0.155913	1.77287	0.0538068	3.27868	0.00974439	3.13952	1.42955	0.0658719	0.0137382	0.011699	3.28764	1.6798	1.634	1.78773	0.14998	0.191628	5.72668
YES	ATCOPIA31A	0.917777	0.910054	0.00265921	1.61462	0	0.00149186	0.000339032	0.00142209	1.68988	0	0.00119784	0.00146825	0.00181889	0	1.34769	0.0658344	1.30213	0	0	0.00301194	0.00197001	0.000416709	0.00263076	0.00196197	0.0154525	0.000501664	0.00187663	0.00686221	1.69573	1.60139	0	0.004446	0.00269822	1.70375	0	1.90023	0.000325883	1.66104	1.07744	1.74965	0.00123744	3.63104	0.0011692	0.0114405	0.000678723	0.00233279	0	0.00124802
YES	ATCOPIA32	2.00915	1.88633	0.000801298	0.132164	1.13858	1.48563	0.123952	0.0835267	1.76858	4.00469	3.16947	0.003317	3.83648	0.0808154	0.00320257	0.00131307	0.00524649	0.0644651	1.8968	0.00227594	3.39232	0.0740992	3.09894	1.36226	1.73205	1.64239	2.79257	1.63554	1.85795	1.59112	0.0593784	1.24643	1.60243	1.65429	1.57469	1.77173	0.0023682	1.32208	0.0741074	0.085491	5.07826	3.63447	0.103674	1.25558	2.18435	1.38538	0.0705859	0.0779929
YES	ATCOPIA32B	2.14226	2.16103	2.9448	2.00038	1.79548	3.34675	2.28604	2.3894	0.997318	2.50556	1.08346	3.28858	1.79874	2.03008	1.33479	2.52602	2.4074	2.25058	3.31077	2.63856	2.39627	2.46061	2.13111	1.97966	2.03003	2.6538	1.97597	2.20206	2.93192	2.97724	2.01495	2.15041	2.86577	2.2019	2.2065	1.82193	2.87771	2.41734	2.28054	2.29657	1.60652	2.52446	1.48998	1.81162	3.34034	1.83114	2.57344	2.75592
YES	ATCOPIA33	2.0802	2.07711	3.20005	3.3873	2.34156	2.97585	3.76732	3.63978	2.66176	3.65757	2.895	1.74738	3.33092	1.46676	2.66975	1.86379	2.59602	1.20382	0.968148	2.81349	2.07485	2.95142	1.85277	3.25998	2.88009	2.00856	1.77234	2.87603	2.62877	3.34518	1.78835	2.5774	2.738	3.74074	2.80421	1.67194	4.23595	3.30545	3.20704	3.83142	3.76955	3.3363	4.33626	2.53607	3.37752	1.33512	4.1265	4.23093
YES	ATCOPIA34	3.22431	3.12388	4.80437	4.42068	2.63972	5.73576	2.22147	3.78507	6.05684	3.75491	4.38033	3.64624	5.83142	4.32962	3.75364	2.9281	3.12107	5.82995	4.6796	3.2116	2.25535	3.65348	2.1783	4.32981	2.97585	2.4037	3.64092	4.62156	3.61426	4.98464	4.54129	3.8609	4.85785	3.12308	3.8604	5.16796	4.04481	4.29793	3.75808	4.91131	6.1549	4.0015	3.31655	3.54385	4.06781	4.21729	5.95205	4.31571
YES	ATCOPIA35	6.49864	6.36237	7.3633	5.00461	7.22588	3.62444	5.4006	7.86346	4.87529	5.05342	3.70367	4.85115	6.32717	3.63302	7.03605	4.1661	4.9497	5.74586	6.61544	7.45358	8.2499	7.31887	7.49846	6.36788	6.45391	5.38217	6.78184	4.85527	7.40639	5.79347	4.27622	4.91424	4.90332	5.85638	5.03089	3.92787	5.87227	6.45411	6.74957	4.49094	5.82094	7.08448	5.18723	6.49532	7.86157	3.99185	6.9002	8.97617
YES	ATCOPIA36	4.6252	4.53082	10.9049	6.22378	5.93905	8.45879	8.9475	12.256	9.95347	8.90584	7.92538	9.42531	10.1959	6.74084	5.6023	6.41435	5.2481	8.17246	8.7609	4.69354	9.19246	5.41479	8.11001	5.74543	9.7065	9.49388	7.54626	8.14244	10.1524	9.77315	9.99241	6.39262	7.43366	13.0396	9.12873	11.0632	6.28091	7.15047	9.4691	8.21733	8.22212	11.0456	5.55125	5.34222	12.721	6.8028	9.45377	14.4938
YES	ATCOPIA37	1.04817	0.987215	2.06049	2.22847	0.963532	3.07137	1.66363	2.21126	1.32513	2.21185	1.36702	2.0963	2.57053	1.23969	1.85389	1.82768	1.85098	1.39139	2.2613	2.04525	2.1888	2.15452	2.00678	2.07905	1.35617	1.96976	2.05629	2.06653	2.77138	0.564581	2.64108	1.96846	2.13093	2.08584	2.18704	1.30335	2.76679	1.21685	2.58186	1.20614	2.19506	2.344	1.80039	1.24558	2.31024	2.12554	1.42666	2.46553
YES	ATCOPIA38	2.09009	2.07437	3.00922	2.84749	2.27523	2.99329	2.92916	2.93987	3.11151	3.08365	2.8857	2.84014	3.64026	2.75423	2.78172	2.44535	2.41281	1.51448	3.17791	2.58075	3.04234	3.06916	2.73419	2.5661	2.31685	2.74838	1.37811	2.67219	2.47148	2.49403	1.43236	2.46117	1.4	3.03329	2.75621	3.22704	1.17343	2.49649	2.67033	2.78043	2.72184	2.77895	2.39226	2.31398	3.44876	2.78391	2.90941	1.46366
YES	ATCOPIA38A	1.037	1.03747	0.0197738	1.64963	0.0046002	1.99973	1.79313	1.58731	0.279002	0.00391152	1.86074	0.307755	0.326175	0.291647	1.62833	0.307388	1.30414	0.00104946	0	0.158092	1.67698	1.88091	1.4494	0.124073	1.66787	1.49778	1.43562	0.00191172	0.285022	0	1.45816	0.281755	1.47425	0	0.122345	0.361959	1.54029	0.292715	0.175892	1.73002	0.279559	0.00218008	1.53331	2.23638	2.14235	0.288962	0.0257785	1.87876
YES	ATCOPIA38B	1.00362	1.01052	0.033671	0.036815	1.16577	0.00247255	1.30293	0.0327672	0.000904362	0.0316117	1.44045	0.0254571	0.000295883	0.0264406	1.34136	1.29764	0.0374749	0.034419	1.59751	0.000281154	2.8534	0.0030486	2.56697	0.00315283	1.26332	0.0708888	0	0.0334282	0.00160517	1.41405	0.0295709	1.07741	0.0146304	0.0302959	0.0316835	0.0298553	0	1.23498	0.00223127	0.0296145	0.00427746	2.70475	0.0539146	0.961312	1.54538	0.0122801	0	0.0221937
YES	ATCOPIA39	1.09779	1.03047	0.123077	0.00426062	1.21697	0.150349	0.136672	0.0182822	0.128623	0.00260813	0.168267	1.68207	0.00331657	0.00043645	0.00617321	0.00174403	0.103339	0.00519563	0.131504	0	0.154031	0.00276552	0.124418	0.00266629	1.37013	0.179564	0.119203	0.144434	0.00307861	1.55562	0.116726	0.13812	1.547	0.00257982	1.56017	0.00186656	0.0210106	0.0053992	0.0416494	0.00323757	0.002309	0.142602	0.00320997	0.00109084	0.171447	0.0107207	0.0216451	0.0179447
YES	ATCOPIA4	1.81887	1.84789	2.81648	0.0131326	5.72871	1.46829	2.99993	3.17508	2.08187	1.8068	5.13613	4.03952	5.05799	4.5086	6.65528	0.384675	1.448	1.71891	2.98401	10.0643	2.12219	8.16411	1.7831	2.43484	1.38231	0.0802836	0.0128228	1.82906	3.85948	0.00425791	0.00934282	0.715455	5.77531	3.26629	3.00902	2.92602	1.75721	1.20149	4.5588	6.63263	5.78447	5.20129	1.27739	0.0512396	3.28349	0.500176	7.05146	5.67074
YES	ATCOPIA40	3.21286	3.06264	2.92182	1.63665	2.85008	3.92158	4.47923	1.78014	3.63622	2.4171	6.05953	6.33233	1.82193	3.68372	1.78684	3.11536	2.79899	3.13044	3.98107	4.88016	3.74992	3.48346	3.39794	3.33271	1.68208	3.52329	3.33691	3.68452	5.51783	3.3615	4.48178	3.44528	3.38393	4.68226	3.80156	2.80474	3.63685	2.73346	3.16558	3.26885	4.05996	3.96312	2.28934	3.07799	6.54607	2.82241	2.42522	2.00373
YES	ATCOPIA41	6.12079	6.03424	7.26723	7.13689	5.08082	6.71151	7.42085	5.60694	8.07379	6.09049	8.01048	7.73861	8.46181	5.58656	5.60753	5.7114	6.09199	6.54888	7.52938	6.58523	8.23347	7.42038	7.46744	5.06776	5.81041	6.55048	6.70353	6.92951	7.14749	7.17503	6.01954	5.28418	6.48959	7.15841	6.44186	8.84907	5.23164	3.28317	5.43731	8.28881	7.04263	5.86393	6.99046	6.35584	8.25885	5.9438	8.08895	8.39201
YES	ATCOPIA42	3.1818	2.95984	4.64484	4.49569	3.56397	4.61017	4.61274	5.12813	3.83282	5.13646	3.28263	4.29081	5.1835	4.51766	4.71993	4.81763	3.5848	3.6833	3.30468	4.62591	4.86739	6.96927	4.41115	4.3002	3.74008	4.9341	3.44455	4.31123	4.07338	3.16508	6.88077	3.6027	4.59518	3.79194	4.78527	4.97894	4.21501	4.07831	4.10792	4.99152	5.3001	5.18603	3.55756	3.62764	4.72556	3.96431	3.65616	5.08438
YES	ATCOPIA43	6.36812	6.34222	5.41936	6.45452	4.80152	9.75141	8.54864	5.99224	9.50463	7.14144	8.98753	10.3722	7.45952	6.05081	6.67233	5.54923	4.71669	7.7983	10.2305	8.13084	8.05609	8.8477	7.33619	6.40496	5.28693	7.82274	6.83074	7.76359	7.22989	6.83463	7.662	5.61897	6.38714	7.82406	4.45111	8.93078	9.28094	2.90453	6.78583	7.23946	8.37998	6.60618	6.72949	6.37913	9.71515	6.69114	8.02812	6.83091
YES	ATCOPIA44	3.11496	2.96956	4.55936	4.40365	3.60391	4.77491	4.65453	4.91904	3.80257	4.67879	4.91614	4.44656	5.35435	4.68308	4.05522	3.81502	3.82858	4.48642	4.39699	3.24237	3.30877	4.3097	2.98961	4.02932	2.9226	3.19097	3.95975	4.43302	4.32849	3.87819	4.03181	3.84515	4.36018	4.57217	4.81992	4.72037	4.27517	4.10179	4.40212	4.57606	4.7535	4.56018	3.66456	3.92605	4.76528	2.78688	4.24284	4.93659
YES	ATCOPIA45	5.37293	4.95105	6.08214	4.32144	4.80493	3.47127	4.99191	5.97418	4.62388	5.36778	1.88423	6.26186	5.65832	2.51393	5.18518	3.8464	5.13913	7.489	8.32718	4.42001	8.38723	6.61479	7.41676	5.3665	5.56775	4.2786	5.0793	4.24699	4.29434	5.88909	5.61174	4.10253	4.29886	4.60296	7.6646	3.33425	5.85924	5.80679	4.86512	3.13424	4.40148	10.8978	8.31664	4.25794	6.67857	5.5214	6.13379	9.21765
YES	ATCOPIA46	1.12051	1.04403	1.72747	0.0081865	0.0100286	0.00234422	0.00845983	1.78804	1.66024	2.00322	1.76894	1.92033	2.19339	0.101159	1.37334	1.25909	1.49313	1.53847	1.73715	0.0033692	0.00653022	1.73193	0.0148082	1.39881	1.3114	0.2107	0.00301298	0.169431	1.46987	1.67796	1.60815	0.00266712	1.43645	0.0170455	0.164808	1.80813	1.65843	0.00415945	1.41244	0.0624825	0.00516212	0.0045913	0.0206909	0.194604	0.00815811	1.28578	1.83473	2.03212
YES	ATCOPIA47	1.13738	1.06048	1.64735	1.54631	1.11129	1.68598	1.81064	1.81024	1.77608	1.81827	1.55814	1.97758	2.26105	0.00129091	1.41458	1.2622	1.25705	1.56133	0.00105581	1.59394	1.86943	0.00208104	1.55307	1.3944	1.33588	0.0609058	0.00338057	0.00606444	1.48899	1.55436	1.44849	1.06787	1.53805	1.80519	1.68197	1.94179	0	1.2955	1.51059	1.69575	1.70538	1.7401	1.12613	0.00198523	1.56231	1.40359	0.00285177	2.08481
YES	ATCOPIA48	5.5802	5.44483	3.96938	2.87921	3.64002	5.07122	5.31651	5.21825	5.22963	3.22692	5.28149	4.23274	5.09392	5.01264	5.02939	4.15766	3.42766	2.88239	6.39073	4.90491	3.38125	5.33054	3.14147	4.64566	2.74249	2.76444	2.78171	2.98905	4.65634	4.59331	4.63079	3.40118	3.84872	4.24153	5.29542	5.66935	3.00579	2.71337	4.41852	3.01289	3.07933	3.69661	3.70269	2.49126	3.45619	2.83583	3.37464	10.2296
YES	ATCOPIA49	8.72962	8.69787	8.58232	11.7303	6.31215	7.73297	9.55147	7.64307	3.47246	12.0601	5.14427	13.0595	15.2124	8.82149	7.08288	5.39978	5.05795	9.8728	7.07855	9.88237	5.82243	7.91044	5.37166	7.96313	6.29878	9.76264	8.24514	8.76372	5.9028	11.288	6.87897	9.00641	4.63416	5.10332	7.70586	12.7208	7.55504	8.03228	8.24053	13.1774	8.40522	13.1091	8.13663	7.9117	11.4768	3.83702	6.46742	8.70593
YES	ATCOPIA5	1.6911	1.61165	5.13541	0.00614396	2.14302	2.05627	1.79838	0.0412913	2.66585	0.00195313	1.66993	2.21915	5.16362	0.00609391	0.00539184	1.53604	0.00358411	3.25946	0.00356647	1.7728	1.88642	0.32953	1.63778	1.31873	1.39698	0.0679729	1.52783	3.1717	1.70782	1.70633	0.00443903	0.00478951	0.0114822	1.69865	1.52144	1.97458	0.00357487	0.00649582	3.22157	1.8601	1.89654	2.06544	1.00693	0.0115587	0.0183229	1.4684	2.09802	0.02531
YES	ATCOPIA50	2.25046	2.22436	0.0101508	0.011	0.0201347	1.62519	1.54508	1.91781	1.66468	0.00521306	3.29519	1.24393	2.4802	3.22739	2.86103	2.5745	2.56018	0.0141895	1.68352	1.51563	0.0074082	0.0110116	0.0074329	1.35218	1.2244	1.48696	1.45715	0.0165382	2.89517	3.15184	1.34174	0.0108089	3.11915	0.010272	0.0178342	1.81373	0.00388545	0.0110558	1.02074	1.63362	0.00786421	0.00788821	1.30408	1.78406	0.00841696	1.2963	1.76544	2.21517
YES	ATCOPIA51	5.43706	5.66774	7.86909	0.0161105	1.0873	1.72309	3.61815	4.55376	1.65859	1.03475	1.36959	1.89125	1.1831	2.71751	1.33064	4.89182	2.38094	3.56663	1.57218	5.21876	2.91798	0.0805945	2.82442	1.31696	1.49152	0.0631383	4.04068	1.58702	4.2088	2.68321	1.3208	2.25174	1.49839	7.41969	4.55634	2.84965	1.49471	4.3506	3.22094	0.0148415	3.95483	7.53441	3.42819	6.83609	0.0166656	2.60245	0.0184915	8.04949
YES	ATCOPIA52	1.05097	0.956645	3.05747	2.83808	0.0104193	0.00602901	4.53491	1.56718	1.52449	1.56119	0.00409948	1.63678	0.00814199	1.36168	0.0150567	0.00547013	1.2298	0.00759653	3.10924	2.80047	0.00255662	0.00437177	0.0028413	1.32299	2.45065	1.52009	1.30981	0.00909074	1.40708	0.00386347	1.38637	2.19985	0.00309548	5.7805	0.0048515	1.65247	2.86025	0.00677158	1.01006	1.52442	1.57255	3.20455	0.00958217	0.0126881	0.00518122	3.81138	1.66971	0.00578449
YES	ATCOPIA53	1.12007	1.01468	0.00245668	1.36078	0.0239998	1.48668	1.54575	0	0	1.59723	0.0356714	1.51725	0	0	1.26479	1.29057	0.000450765	1.30663	0	0.0993451	0.0022978	0.0231592	0	0.0269143	0.0193397	0.0291198	0	0.0423651	0.03234	0.101418	0.0321002	1.49127	1.31576	0.0200606	0.0370175	1.49836	0	0.0590015	0.0504234	0	0.0420017	0.0506765	0.00108438	0.185476	0.00123729	1.25294	0	0
YES	ATCOPIA54	1.0765	1.01288	0.149467	1.4608	0.014388	1.53969	1.62515	0.190746	0.00235797	1.68273	0.156672	1.62205	0.0194473	0.327628	1.2435	1.33319	0.139987	1.44164	0.209557	0.178392	0	0.00124686	0	0.155864	0.0311997	0.131473	0.0020634	0.01161	0.00215607	0.00273749	0.121989	1.43314	1.46557	0.143453	0.00100229	1.7003	0.13492	0.166025	0.0290286	0.0093669	0.00425713	0.00104727	0.00822576	0.18686	0	1.28963	0.194083	0.22662
YES	ATCOPIA55	1.03532	1.02639	0	1.06224	0.0352866	0.0129432	0.0439283	0	1.68625	0.046939	0.0258017	0.0166506	0.0772691	0.0366714	0.0291064	1.17655	0.000444307	0.0166106	0.00309754	0.0227058	0.00874625	0.00788302	0.00977506	0.0126809	0.971623	1.48092	1.45854	0.0227335	0.00737416	0	0.000350483	0.184756	1.51079	0.00192041	1.04253	0.000906211	0	0.175739	0.0896404	2.59442	0.00220352	1.79256	0.0932532	0.338571	0.0109623	1.33114	0.000556325	0.000546822
YES	ATCOPIA56	3.18584	3.24961	1.29426	2.51737	2.09993	3.30128	1.28343	0.00376462	1.66357	1.5328	4.44023	4.47644	1.93146	1.66327	1.44345	4.7753	0.010973	2.55235	1.76064	1.05134	2.66412	2.71229	2.46113	0.162212	2.47272	1.11618	3.80584	3.14277	1.46002	1.6555	3.01138	1.19909	2.59107	1.58695	0.174816	1.76855	3.22913	2.36722	3.31953	2.54033	3.24307	1.68043	1.33658	1.47217	0.00504611	2.31676	0.00387428	0.00603253
YES	ATCOPIA57	6.43618	6.21056	11.5833	6.39573	4.4376	9.15024	10.8755	7.24433	11.6314	4.86609	7.89529	10.6039	8.51708	3.18662	6.35452	5.84995	5.2837	8.24566	8.90128	5.47465	8.41885	8.08353	8.01201	4.34258	7.71214	5.93603	10.5098	6.51494	7.18458	4.87204	9.43931	5.9007	7.65849	10.348	6.9915	8.4735	9.37955	7.89375	5.80966	8.97921	4.73442	1.75993	7.006	7.67975	8.46807	6.43222	5.03533	1.88682
YES	ATCOPIA58	3.45269	3.30901	3.17014	2.7797	3.37218	4.8445	4.23337	4.41114	5.49237	4.92016	2.88005	4.46711	0.723577	6.5496	4.05084	5.36249	3.53136	6.94762	1.72651	3.9592	5.21598	5.89858	4.79346	6.39999	5.65497	4.76502	5.08219	6.22518	4.19016	5.42245	4.96392	3.96978	5.33584	2.93993	4.52638	3.47898	4.29797	3.97575	5.9809	5.26668	4.42702	3.30784	2.7085	2.6359	3.64731	4.68112	3.44913	6.44525
YES	ATCOPIA59	0.976898	0.984339	1.38753	1.49686	1.64696	1.86506	1.61574	1.98569	1.94412	1.99552	1.90256	1.31405	1.40382	0.641274	1.73629	1.58811	1.43663	1.73388	1.9749	1.37907	1.88445	1.82526	1.77746	1.78885	1.62093	1.64595	1.62232	1.69131	1.69716	1.94797	1.31869	1.93852	1.89492	1.82407	1.72262	1.84204	1.69723	1.26815	1.84538	1.87409	1.57626	1.59688	1.83234	1.25981	1.86842	1.51324	1.91194	2.23149
YES	ATCOPIA6	3.0477	3.14752	2.9329	3.0862	3.4903	3.6443	3.512	4.0086	3.271	3.3259	3.3062	3.2424	4.1763	4.2004	2.7962	3.7685	3.3478	3.9066	3.5598	3.8674	2.9176	4.0164	2.9998	3.0333	3.7401	2.9168	3.2237	3.6435	3.7868	2.9638	3.8573	3.0509	4.1179	2.8381	3.3315	3.7016	2.9242	3.5129	3.7523	3.1526	3.2817	4.015	3.3355	2.9267	3.6563	2.792	3.8084	3.8649
YES	ATCOPIA60	1.08917	1.07057	0.262971	0.00118113	0	0	1.49161	0	1.6897	0.00196361	1.52788	1.72333	0.281571	0.0014672	0.00157306	0.00225463	0	0.261418	0.00164164	0	1.61864	1.6321	1.56274	0	0.0132404	0.00140251	0.225121	1.56854	0.252826	0.00197071	0.00111932	0	0.00191058	0.256285	1.46407	1.91621	0	1.11297	0.00147602	0.000417101	0.00173208	0	0.241599	0.00183352	0	0.00256666	0.00266002	0
YES	ATCOPIA61	1.07779	0.985986	1.42386	1.40554	1.18425	1.56557	1.63529	1.54576	1.43011	1.62562	1.56005	1.57224	1.79512	1.3792	1.3527	1.29616	1.25804	1.47418	1.58596	1.32692	1.62057	1.46358	1.4412	1.37976	1.37308	1.55565	1.44072	1.41756	1.45636	0.656618	1.35417	1.5828	1.45816	1.47215	1.58413	1.64983	1.26455	1.76944	1.53698	1.4417	1.4358	1.63208	1.57371	1.74052	1.61413	1.31069	1.48927	1.76264
YES	ATCOPIA62	1.09588	1.03475	0.00676226	1.52277	0.0588158	1.71703	1.71197	0.00448617	1.40865	1.8139	0.0614686	0.0425123	1.87581	1.32738	0.053241	0.0522393	0.0588053	0.0514923	0.0469258	0.0426811	1.72291	0.00666303	1.55348	1.35579	0.0845665	1.39124	0.0433206	1.56676	1.54692	0.040627	1.25816	1.54182	1.45674	0.00519636	0.044664	0.0476039	1.53783	1.72361	0.025305	0.0512708	0.00782904	0.0628938	1.53933	0.0718748	0.0464836	0.0554942	0.00305221	0.00421174
YES	ATCOPIA63	1.10699	1.06517	1.57772	2.95902	2.29022	1.56691	1.69732	3.54096	0.00967838	3.25778	1.62362	1.5748	3.61916	0.00994406	2.56877	0.158396	0.0168448	3.00285	1.44656	2.98992	0.00823301	0.000813183	0.00553807	2.6983	2.81643	3.3028	1.52588	0.0059845	1.40058	0.00493083	0.00535418	1.51737	2.92637	1.60157	1.62493	1.62513	3.1153	1.31237	2.05178	1.56978	1.6198	1.65618	3.99829	2.45186	3.4967	0.00711089	0.00818963	2.02156
YES	ATCOPIA64	4.21688	3.88089	3.27852	4.3307	3.70016	4.587	3.44506	6.51694	7.16329	4.82014	5.58508	5.80377	8.55754	4.56485	5.17766	2.74949	3.69217	4.30224	6.22578	3.08537	5.80558	4.67407	5.19366	5.16905	2.87457	5.36791	5.16175	5.69354	4.26906	5.66338	4.23341	4.36697	4.12517	5.66344	5.84717	4.83219	5.65509	4.43513	3.98257	3.22712	4.39917	4.78817	2.94692	4.90249	6.23309	2.53024	4.22095	7.15387
YES	ATCOPIA65	3.27893	3.30563	1.40019	1.45438	1.57918	1.63845	1.8638	3.43723	3.15674	5.24075	1.52934	2.12427	2.08647	1.11507	5.68672	1.70772	1.33554	1.65775	4.54885	1.7076	3.16272	0.817056	2.82657	0.247931	2.856	3.04377	3.89472	1.46553	1.54599	0.218488	1.38465	1.68338	1.7055	1.51337	0.449077	4.82318	1.05489	3.105	3.78845	4.56395	2.53733	3.63462	1.53036	4.38649	2.38243	1.4712	2.55418	1.93949
NO	ATCOPIA65A	1.16476	1.05534	0.419903	0.418614	0.515913	1.08508	0.258181	0.515211	1.14244	0.304668	0.252586	0.260353	0.425321	0.302406	1.20399	1.42886	0.406266	1.14163	1.33875	1.27916	0.29129	0.343968	0.336568	0.391993	0.386503	0.361529	0.349762	1.40293	0.252652	1.19069	0.306805	0.576826	1.12209	0.416896	0.46357	0.351196	1.10104	0.500798	0.272383	0.3845	1.38461	0.380951	1.40639	0.537894	0.355572	0.365346	0.231161	0.345281
YES	ATCOPIA66	5.54332	5.32643	7.19213	8.20866	5.36616	9.23009	7.38994	7.93627	8.71022	7.82969	8.94154	8.02261	10.5079	6.6036	6.01157	6.87506	6.48728	6.91146	6.46051	7.50324	9.19678	9.23319	8.28225	7.23775	7.61851	8.08906	6.51684	7.42751	7.95611	8.13456	6.49012	7.5467	7.47379	8.53355	8.66799	7.57141	8.33395	6.78481	7.38124	8.86201	8.47542	9.47359	6.7818	6.30067	7.81129	8.43013	9.34547	9.72383
YES	ATCOPIA67	1.84874	1.90116	2.86123	2.86319	2.09777	2.91695	3.08801	2.97556	3.11169	3.33865	3.14012	3.36816	3.56649	3.01197	2.57603	2.42514	2.50326	2.87112	2.81732	2.7124	3.2306	3.03182	3.07014	2.62258	2.68896	2.8295	2.58869	2.87493	2.71807	2.81961	2.60643	2.33646	2.9633	2.69265	2.80707	3.03533	2.81513	2.53875	2.87368	3.2222	3.25071	3.09847	2.57323	1.31423	3.08871	2.5373	3.14647	3.45967
YES	ATCOPIA68	1.9457	1.76619	2.81132	1.88613	1.1802	2.03954	2.17216	1.91981	3.06291	3.1254	2.98321	3.2675	1.86127	2.8241	2.63265	2.4269	1.75756	2.79653	3.11576	2.7403	2.98628	3.07699	2.88816	2.50143	2.6877	2.7591	2.58318	2.81898	2.66494	2.95405	2.81117	2.42741	2.75497	2.7321	1.94787	2.18749	1.94879	1.83614	2.7945	1.99826	1.58451	2.59989	2.47454	2.52328	3.12242	2.42775	2.13963	2.25388
YES	ATCOPIA69	5.12844	4.98346	3.87235	1.85073	1.92173	7.04636	3.00515	4.36373	1.64278	6.43166	2.83863	4.67888	9.62531	3.77929	6.51342	6.13977	4.68735	4.39308	4.79075	4.90723	4.71487	6.2651	4.30809	5.16751	3.00411	4.33813	6.56104	4.41332	5.05563	2.33058	3.39405	5.01768	6.42426	2.8747	2.67896	1.24149	4.39945	2.51677	3.5136	3.97109	4.60055	4.70291	2.93678	5.25235	6.36925	5.30925	5.86372	3.26678
YES	ATCOPIA7	1.03786	1.02615	0.01081	0.00571767	1.20473	0.00618198	0.00888575	1.79137	1.13573	0.125658	0.00858722	0.0110678	1.37677	1.53272	0.0125982	0.0065897	0.0045338	1.61091	0.00967189	1.48701	0.00748886	1.19329	0.00696413	0.00641212	0.0300953	0.00747906	0.00506384	0.00702229	0.00497482	1.49196	0.00551145	0.00650261	0.00547579	0.00638421	0.0046184	0.00883622	1.58218	0.00530064	0.00789403	0.0062231	0.00753015	0.00996392	1.47158	1.45963	0.00981266	0.00491643	0.00821857	1.97048
YES	ATCOPIA70	3.06176	3.12979	4.45282	4.34327	2.81811	4.70024	4.64307	0.0074241	4.53648	5.06385	4.57404	4.93851	3.91881	4.06636	3.66582	3.21118	3.88002	3.9487	4.94394	2.76827	4.61944	3.18701	4.19153	2.68293	4.09443	4.09671	3.98407	4.41955	4.13354	3.05385	3.67009	2.58887	3.75824	3.96112	3.96566	5.20189	1.42801	4.21572	2.89743	4.95157	3.07856	4.99543	3.54758	2.48476	4.9757	2.49642	5.31261	3.53852
YES	ATCOPIA71	1.05893	0.950842	0.00470338	1.55876	1.22262	0.00232746	0.00291658	0.0034312	0.00347907	0.00112728	0.00391238	0.00635855	0.00516544	0.00301827	0.00181718	1.20865	0.0025658	0.00446031	0.00280484	1.42486	0.0398789	1.69386	0.0443519	1.39629	0.0259368	0.00503492	0.0548206	0.00405683	0.00266127	1.47621	0.00350916	0.00688819	1.3557	0.0304981	0.00330369	0.00433078	0.00280347	0.00723442	1.06718	1.58185	0.00376608	0.00451916	0.0423207	0.00596397	0.00239546	0.00298927	1.81513	0.00598243
YES	ATCOPIA72	1.109	1.06269	2.58	0.00756339	1.32316	1.55845	0.282434	0.00754372	0.00555047	0.00711219	1.51184	1.67592	0.0100608	1.55774	1.32249	0.0999931	0.0105438	0.00528205	3.50288	1.40203	0.00564318	0.00504878	0.00665887	0.00908952	0.0228527	0.00363254	1.24976	2.89941	2.86316	2.88566	0.00568857	2.47468	1.41523	1.60417	0.00836224	0.00337817	0.00283885	0.0056758	1.47564	0.00870812	1.50478	0.00407065	0.00709439	0.0350711	0.00689733	0.0135729	1.69212	0.00658146
YES	ATCOPIA73	1.0236	0.961308	1.57839	1.49439	1.20771	1.52622	1.62351	1.66297	1.30605	1.21614	1.5006	1.19596	1.34727	1.51869	1.30821	1.31174	1.40565	1.54554	1.55863	1.45257	1.61002	1.69461	1.41458	1.11857	1.42989	1.51388	1.15309	1.54442	1.11395	1.46386	1.50459	1.2011	1.54167	1.58672	1.45984	1.76255	1.49733	1.23147	1.40935	1.54976	1.13856	1.67683	1.18024	0.965656	1.16816	1.40479	1.71033	1.77552
YES	ATCOPIA74	1.08252	1.06453	5.22429	0.000512998	0.0120458	1.15765	0.00163804	1.64986	2.77289	1.56141	0	0.00287349	0.000362596	1.51223	0.00136078	2.31936	0.00482525	1.46952	1.59382	0	0	0.00100777	0.0026639	0	3.89417	1.49801	0.00341599	0.00134095	1.49522	0	1.48043	2.37943	0	0.00459635	0.00751818	0	1.17551	0.0021944	0.0012695	0	2.64972	0	1.21685	0.00373521	0.00164143	2.16112	1.71161	1.37489
YES	ATCOPIA75	5.60835	5.5601	8.20377	7.21996	5.85243	7.99998	9.85093	6.20352	7.40262	8.10518	7.7288	8.19278	10.39	9.28896	10.289	7.49233	5.20804	10.4866	6.45712	8.71045	7.59533	6.67644	7.03765	9.16549	9.14918	7.29058	6.88705	10.6007	7.13193	5.76925	5.63775	7.91537	8.72224	7.51418	7.70855	8.40701	5.7762	4.54241	8.18829	9.15487	7.52882	9.80394	5.45546	7.87974	6.73962	5.09768	8.57189	7.12039
YES	ATCOPIA76	1.08507	1.04574	1.52642	0.755306	0.00888894	0.0156331	0.136843	0.114113	1.75724	2.32064	0.00786724	1.75112	0.00798036	1.54351	0.00509971	0.0139263	0.00204875	1.6071	0.0101836	0.00984857	0.0171651	0.0143825	0.0228843	0.00435247	0.0295545	0.0919011	0.0131516	0.104071	0.00869608	1.47305	0.0141825	1.16651	0.00948103	0.00380353	0.0047979	0.0230617	0.663722	1.79166	0.469837	0.836732	0.121873	0.00492234	1.26812	0.0979489	0.0206692	0.00465015	0.0130902	0.14895
YES	ATCOPIA77	0.943958	0.940563	1.37754	0.00346377	1.13138	1.7333	0	1.71707	1.69042	1.82231	1.75958	1.84207	2.04169	1.65245	1.29366	1.24726	1.17977	1.17737	1.81884	1.51684	1.64025	1.85085	1.57089	1.34694	1.35746	1.53344	1.3654	0.00302597	1.62793	1.52383	0.00117656	1.26964	1.62259	0	1.60978	0.00224618	1.6319	1.60041	1.72274	0	1.67627	1.7629	1.47745	1.49114	1.84686	1.20874	1.91696	2.12951
YES	ATCOPIA78	12.9024	13.7955	6.00169	5.29655	3.37724	3.42917	5.37845	22.8947	9.17036	3.15034	5.52582	6.14176	5.50849	1.68526	6.97605	7.34458	9.07842	9.22518	9.84671	4.43399	4.46249	5.33143	4.20425	4.49462	6.60176	8.37326	7.18271	9.13063	6.24201	8.19178	5.63111	5.05813	4.49272	8.1217	3.38906	4.72444	12.2051	6.66636	5.40917	6.81842	6.2866	6.4972	4.10252	4.34051	8.81694	4.02018	6.50876	17.3619
YES	ATCOPIA79	2.17731	2.08467	1.90333	3.10409	2.48273	3.8546	3.62086	1.88058	2.19764	3.58417	3.40514	2.07171	2.85966	3.62314	2.95004	2.58409	2.51491	3.45225	3.37844	1.61985	1.60575	3.69546	1.48509	2.78164	3.08392	3.37987	1.67477	3.29976	1.64973	3.59358	3.01602	2.68412	3.43428	3.3019	3.4485	2.14071	3.24678	2.88467	2.66507	3.24208	2.01186	3.65542	1.65329	0.328517	1.79293	2.68887	3.79451	3.74616
YES	ATCOPIA80	1.07115	0.980926	1.53039	0.00144192	0.00109084	0	0.0011833	0	0	0	0	0.00196046	0.00190668	0	0	0.00133171	0.0085296	1.609	0	1.51617	0	0.000447017	0	0.0022014	0.0170866	0.00109194	0.00313441	0.00957349	0	0	1.38644	0	0.00146603	0.00416897	1.4707	0.00114185	0.000731821	1.22246	1.00026	0	0	1.97239	0	1.11504	0	1.26475	0.000672765	0.000665003
YES	ATCOPIA81	0.958922	0.895209	1.48964	1.50479	0.0143274	1.60013	0.0704876	1.58811	0.00503887	1.70426	1.26352	1.63588	1.83859	1.48712	1.25694	1.22532	1.31488	0.0614664	1.54748	1.36645	1.58265	1.69066	1.41348	1.34474	1.37301	1.45224	0.0683671	1.5404	0.0497392	1.4185	1.41713	0.0505622	0.00248236	1.54932	1.6425	1.71625	1.43229	1.15458	0.769089	1.54089	1.50932	1.55473	1.08685	1.05049	1.68484	1.2639	1.63169	1.73984
YES	ATCOPIA82	1.07978	1.00684	1.67884	1.42854	1.10601	1.61588	1.58159	1.49555	1.75563	1.64621	1.52985	1.7421	1.94598	1.53913	1.2192	1.24925	1.29952	1.5189	1.67347	1.43029	1.78304	1.76925	1.60032	1.34066	1.35511	0.0548599	1.40169	1.58778	1.45182	1.4493	1.38499	1.17552	1.42303	1.67393	1.66582	1.74485	0.00379724	1.25377	1.51102	1.57961	1.58601	1.62203	1.22756	0.0806496	1.83279	1.32906	1.7003	1.75744
YES	ATCOPIA83	1.38053	1.82241	0.230306	0	0	1.168	0.219546	0.344379	0.43277	0.145468	0.233015	0.0945722	0.219237	0	0.0390825	0	0	0.0357328	0.335134	0.195304	0.113548	0.202385	0.0636429	0.163962	0.0956094	0.0116022	0.0216405	0	0.356137	0.258386	0.0273524	0	0.187208	0.0250343	0.071053	0.589941	0.527579	0.04182	0.777266	0.92732	0	0.376628	0.808687	0.0202804	0.313942	0.0210106	0.420628	0.457477
YES	ATCOPIA84	0.912073	0.931955	1.44571	1.56079	1.06859	1.52342	1.59772	1.69984	1.7407	1.44095	1.47565	1.59149	1.807	1.39309	1.27404	1.17852	1.2419	1.53411	1.67358	1.3008	1.71143	1.73077	1.50716	1.13647	1.41515	1.41997	1.29223	1.51916	1.38241	1.41036	1.34004	1.09772	1.40914	1.46674	1.40178	1.71132	1.52444	1.10541	1.40571	1.64226	1.58798	1.76222	1.18191	0.855401	1.71387	1.31368	1.69114	1.90623
YES	ATCOPIA85	1.1064	1.03979	1.57716	0.00599097	0.00579673	0.786545	2.40064	0.016342	0.00637036	0.790987	0.769839	1.69768	0.829727	2.88658	0.00833346	0.00764209	0.574137	0.00838148	0.00592816	0.00552156	0.00323478	3.3656	0.00444122	0.0124111	0.0294639	0.00627264	0.0059898	0.70204	0.0148367	1.52162	3.099	0.0106057	1.56521	0.00727622	0.0083525	0.00376048	0.00429529	0.00902407	1.99384	3.13062	0.00712101	0.00597009	0.00730032	0.569048	0.00596408	1.34376	0.00633906	0.00507125
YES	ATCOPIA86	1.05064	0.998011	1.58508	1.52177	1.10351	1.63351	1.73351	1.7052	1.72253	1.68529	1.65039	1.79084	2.06687	3.15817	1.42294	0.25437	1.24994	1.56636	1.69432	0.220464	1.75973	1.65	1.65776	1.48674	1.46426	1.57253	1.34257	1.46586	0.231907	1.63904	1.50498	1.25389	1.51014	1.66127	1.5743	1.81192	1.61222	1.36146	1.50342	1.59522	1.63203	1.7261	1.28422	1.21375	1.75423	1.35272	1.86481	1.90135
YES	ATCOPIA87	0.952938	0.905913	0.000865914	0.948782	1.15639	0.00126842	0.00590156	1.52609	0.021269	0.916845	0.00778085	0.0106655	0.148663	0.00244329	0.749614	0.0367743	0.017827	0.0183849	1.54527	0.00981147	1.58183	0	1.43841	0.121657	0.751482	1.42028	1.38163	1.54401	0	1.45788	0.0190408	1.36868	0.743195	0.00565076	1.55815	1.58562	1.41119	0.923094	1.43393	1.62337	0.000538512	1.61759	1.27979	0.986125	0.00531011	0	0.154986	1.75165
YES	ATCOPIA88	1.05572	1.02648	1.63002	1.3075	1.21746	1.58017	1.64901	1.60126	1.83233	0.975047	1.74813	0.352189	0.258926	1.65096	1.37564	1.29003	1.55495	1.59042	1.78096	1.28244	0.516127	1.46729	0.486086	1.28367	1.36811	1.26083	1.62102	0.0038457	1.2231	1.41281	1.4706	1.4918	1.38918	1.48065	1.4754	2.0138	1.36643	1.18791	1.30624	1.33999	1.44027	1.51237	1.29529	1.05173	1.68877	1.47438	2.08695	1.73446
YES	ATCOPIA89	3.04521	2.99913	1.67043	1.50271	2.2926	3.3406	1.56249	1.65571	1.39886	3.36444	3.17581	1.75706	3.35912	1.41304	2.22453	2.14724	2.54589	2.70798	1.38076	4.09778	3.44773	3.48776	3.08808	1.37631	3.97039	1.56618	2.3737	1.47707	2.94134	2.57969	2.86122	3.60218	2.99876	1.36895	4.27016	5.34443	3.11335	1.30059	3.27585	3.16586	1.61375	2.95334	3.48854	3.77447	3.09946	2.3338	4.73065	3.7004
YES	ATCOPIA8A	1.10263	1.09699	0.0704758	0.0497463	0.0831114	0.0632501	0.0563773	1.39951	1.65795	0.0797766	0.0810819	0.0788133	0.0837944	0.0774111	0.0833673	0.067662	0.0767024	1.4867	0.0929056	1.2811	1.66018	1.67001	1.61745	0.0892987	0.0934219	0.0914854	1.42113	0.0978654	1.48614	1.53727	1.34262	1.3562	0.091432	1.37577	1.40243	0.088164	0	0.11288	0.583824	0.0468026	0.083142	0.000431513	1.09236	1.08616	1.60691	0.0481274	0.000515161	0.0033259
YES	ATCOPIA8B	2.20965	2.17906	1.56049	1.50765	0.0658088	2.86326	1.64488	1.13117	0.000804835	0	1.56228	1.80257	0.00424376	0.000945537	1.4021	1.99877	2.1449	0.000925208	2.04081	0.0604749	1.72439	0.00260787	1.53109	1.37137	2.67971	0.104086	0	1.53527	0	0	2.36831	0.0518568	2.53187	1.12551	0.00276364	0.00117002	1.1526	0.00366559	0.00145612	0	0.546201	1.71944	0.00243684	0.00322391	0.00120285	2.18003	1.23903	2.00314
YES	ATCOPIA9	5.9064	6.26074	6.03713	7.51745	0.00778527	0.0138685	8.43348	0.00307167	0.00681648	3.12036	1.70308	3.01289	1.87792	3.03803	4.03032	1.39631	5.50114	0.00889292	1.59165	1.36161	8.44396	0.0089523	7.56001	1.28646	1.41411	1.38865	0.0102726	1.7312	1.54648	1.50519	5.53281	6.44046	4.48144	7.86783	1.62849	1.75684	0.00349995	5.87437	1.01511	4.96162	0.00259526	3.59248	1.21443	1.26152	3.66428	1.34046	1.71808	1.92785
YES	ATCOPIA90	1.15127	1.09252	1.56378	1.55908	1.16756	1.60384	1.59028	2.7402	0.0680919	1.66254	1.58643	1.65206	3.28639	0.00310287	1.39437	1.28188	1.33952	1.63731	2.95211	1.3603	1.62491	1.72393	1.46129	0.0444961	1.42192	1.50364	1.43665	1.60398	2.73304	1.42389	1.56458	1.28528	1.54729	1.60932	1.64138	1.84175	1.43746	1.25019	1.4877	1.53637	1.53126	1.68671	1.41948	0.117328	1.72235	1.47229	1.67483	4.66768
YES	ATCOPIA91	1.09453	0.981899	1.57249	1.5559	1.01025	1.65723	1.56964	1.52784	1.67775	1.46137	1.64394	1.74237	0.0808138	1.51473	1.40738	1.37	1.39853	1.53068	1.60915	1.5183	1.72353	1.69115	1.4437	1.41418	1.42595	1.49506	1.48272	1.63377	1.46504	1.41326	1.45882	1.06616	1.28736	1.6379	1.48794	1.75855	1.39824	1.41232	1.56498	1.46996	1.593	1.71504	1.66351	1.30561	1.6831	1.37921	1.837	1.78351
YES	ATCOPIA92	0.869947	0.900983	0.0013215	0	1.16871	0	0	0	1.7282	0.000695582	1.70469	0.00220262	2.15234	0	0	1.17812	0.000491967	0.00100939	0	0	1.86496	0.000399647	1.75214	0	0.0192606	0	1.3908	0.00139725	0	1.69371	0.000364709	0	0.00262978	0.00200754	0.00190005	0	0.00060916	0.00503726	0.546901	0	0	0	0.00308684	0.00257883	0.000634354	1.18812	0.00116425	0
YES	ATCOPIA93	4.62515	4.60489	1.99867	5.62376	6.67884	8.05681	9.42532	6.23106	7.7997	11.7008	3.23038	8.62514	6.98516	11.4189	7.61118	2.78865	7.48636	7.76089	4.73083	4.42068	12.3914	9.9583	11.6076	12.2529	4.70362	7.9909	11.7531	9.01218	10.012	5.95479	5.8943	4.93514	5.57938	4.43446	4.75612	9.39806	4.61335	8.71218	7.37111	11.2137	8.67127	8.69093	12.5375	3.98412	8.67498	2.88017	5.43954	10.9064
YES	ATCOPIA94	0.77048	0.795009	0.104539	1.58903	1.13408	1.77671	1.90265	0.106024	0.0686038	1.84136	1.8258	0.104603	2.35856	1.65952	0.102363	0.0999679	1.40164	1.71434	1.85939	1.58707	2.08118	0.0949922	1.78836	1.41876	1.30338	0.136533	1.46075	1.67977	0.0870586	1.77452	0.0903551	1.47335	1.65737	1.87031	0.118673	1.82097	0.0971746	1.58623	1.66628	1.78916	0.0815482	2.02613	1.48374	0.101894	0.0905863	0.0935181	0.103057	2.23358
YES	ATCOPIA95	5.21578	5.0344	6.75966	4.00192	3.86054	4.33567	2.24535	5.01086	3.35569	2.46184	2.90232	3.2796	2.74304	5.67445	3.0776	2.96703	4.63881	3.94044	5.38817	5.38519	5.26109	4.69955	4.92932	3.74374	2.90526	5.30385	2.65293	2.25381	2.53911	3.72576	6.3448	3.65509	2.93268	1.83453	4.27484	4.99501	4.19198	6.81656	5.15767	5.84459	2.01104	7.26823	2.98446	5.83882	4.47983	5.07752	5.36375	5.29636
YES	ATCOPIA96	1.00988	0.95803	1.44103	0.0513598	1.12762	1.3843	0.0539179	1.69135	1.51832	1.76492	0.81131	0.0543194	1.67443	1.64979	1.32045	1.29596	1.20509	0.00805055	0.00408108	1.40826	0.00115803	0.000195598	0	1.35136	1.25108	0.0544653	0	1.36027	1.48361	1.54913	1.27988	0.00410713	1.41336	1.43649	1.51414	0.0449847	1.55738	1.62819	1.4176	0.0541056	1.60842	1.63128	0.689071	1.0322	0	0.00778269	1.76095	1.83377
YES	ATCOPIA97	2.223	2.0402	1.4625	1.43014	2.24751	3.36274	1.56273	1.77942	1.50536	1.47449	1.31221	3.16169	3.4057	4.24456	1.30286	1.2318	3.35218	1.31557	1.50951	2.80482	4.91946	1.48957	4.51002	2.80114	1.35345	1.3203	1.28512	1.39293	2.8714	2.74392	2.79596	2.31807	2.68076	1.32606	1.45957	3.28982	2.90026	1.17809	2.43934	2.91262	3.05684	3.44754	2.76738	2.36908	3.44683	2.4921	3.55988	1.84208
NO	ATDNA12T3_2	53.1699	57.9967	43.0302	38.8014	33.7936	39.9147	38.6138	41.3029	39.6789	40.4766	37.7822	42.4633	54.6962	37.3866	37.2068	35.0974	35.5648	34.0516	40.6323	49.1425	44.5966	37.1042	41.9443	30.7912	37.1998	36.3502	35.827	39.8073	33.7775	34.5155	35.5615	52.4189	32.6624	64.5826	35.2639	42.7175	31.1639	34.3601	32.1714	39.1789	39.5098	71.8538	36.5696	64.5916	39.4027	38.1623	35.0943	38.3826
YES	ATDNA12T3A	6.02369	6.09659	6.78159	3.97333	3.68508	6.1399	3.84052	5.20788	7.20515	4.38339	4.76577	5.8817	5.19334	3.97474	3.90838	5.49225	2.65488	6.74594	5.81526	7.73041	7.10557	7.76874	6.7744	3.60559	3.65125	2.53625	6.1666	3.9151	6.5938	5.10818	5.67989	3.15375	6.9445	2.81104	5.55936	5.10417	3.8558	5.6883	3.61054	3.7746	5.55883	5.34725	3.47207	4.7248	6.5452	7.08716	2.65729	5.33341
YES	ATDNA1T9A	4.20764	4.4008	2.72516	0.588128	1.99452	2.36643	1.98103	4.34126	3.59017	3.92229	2.64752	3.80941	3.80824	3.72947	4.08125	3.90212	5.21831	5.04168	2.47375	4.70398	4.87068	3.71937	4.44678	4.05832	2.60836	3.81057	2.55456	2.58961	3.33393	2.25205	5.07395	4.08361	3.79785	3.97955	5.46437	2.52318	3.62477	2.55884	2.59311	2.85665	2.46073	3.80258	4.08084	5.47911	3.7034	3.89071	3.84921	4.44334
YES	ATDNA2T9A	10.3878	10.8968	10.5089	9.65013	9.07708	9.56426	7.74879	12.9596	8.42717	7.23182	8.1005	7.39772	5.23094	8.07398	11.7953	11.6559	13.9698	8.65631	9.05498	10.7247	9.49433	7.8442	11.1253	9.60854	10.3039	12.957	10.3227	9.66475	7.15811	10.0602	11.5106	16.0242	11.6596	9.36671	14.2529	7.10807	13.9152	14.132	11.7574	6.34937	8.30662	6.49884	9.80733	10.6051	8.09927	11.0894	10.8386	10.0034
YES	ATDNA2T9B	8.97961	10.05	9.64773	8.45211	7.76116	6.18526	5.9634	5.61794	4.30112	6.74561	7.14308	7.86735	5.02116	8.23642	10.6705	9.09988	8.86597	6.01651	6.08097	6.44552	7.828	7.42234	9.10496	6.78755	8.60667	13.1164	10.6563	8.72076	5.9669	10.4469	7.50404	9.94561	7.08076	8.23708	10.38	5.04614	6.55943	9.89963	8.23744	8.00886	7.90661	7.22638	9.25185	11.4401	7.58992	10.2789	7.14081	5.60489
YES	ATDNA2T9C	18.6418	18.3372	15.7841	15.572	19.1549	11.7623	14.0408	12.7313	11.5652	10.4977	13.8225	10.929	11.8354	15.8967	17.4498	17.5745	15.6153	14.5004	12.4959	14.3786	11.1679	11.7213	13.4668	18.4414	17.0803	17.4938	16.5116	12.3359	14.4176	15.0751	15.4151	18.8666	13.6897	12.7949	11.4817	10.597	14.8821	20.1275	15.0724	13.2887	15.4657	10.8462	20.5537	21.5452	12.8516	18.354	11.4011	9.98755
YES	ATDNAI26T9	5.69886	6.00052	2.60145	5.41267	4.07901	5.08591	5.19262	7.39988	4.83945	3.75119	5.8982	4.30264	7.64706	3.68806	6.63877	4.30021	2.8427	5.2008	5.83361	8.22706	3.72863	5.18683	3.0955	8.24255	5.26517	5.09535	3.56363	6.90569	4.22834	4.71569	5.24736	3.85032	5.02785	6.7016	2.87068	4.93945	4.36257	6.2056	4.029	1.18964	4.56552	4.90819	4.92545	4.88538	6.09475	4.0573	4.8971	2.5661
YES	ATDNAI27T9A	14.9848	15.5228	7.64376	9.40943	9.05457	7.96749	6.54475	7.58005	8.58552	10.656	8.40646	11.2701	3.51391	8.99511	6.91951	10.4842	6.58881	7.55855	9.05073	7.76744	7.82492	8.2064	7.31493	10.3793	8.9272	3.89662	6.26792	11.5695	10.7654	5.68488	5.92646	9.21925	8.80524	8.41768	10.022	7.11297	4.0656	6.12778	9.22211	9.50849	10.188	9.90362	3.99391	4.46056	10.253	10.735	5.72707	7.37055
YES	ATDNAI27T9B	7.73596	7.8042	6.8358	6.10866	3.82344	5.54115	7.28121	7.45413	3.22855	9.71598	5.83691	5.31449	6.17133	5.20324	8.62553	8.46299	9.33508	6.04103	5.74457	9.9259	7.35398	5.43743	7.07102	9.49089	10.9106	7.08692	4.34927	5.75477	8.11429	6.05822	9.60569	10.0298	11.0791	6.38106	1.47834	5.79344	5.41606	6.82166	8.61066	7.29969	4.89699	5.5754	6.83787	3.1021	9.86988	9.12016	10.0466	9.75303
YES	ATDNAI27T9C	6.28958	5.95996	5.23455	6.867	5.71874	5.78247	5.37851	4.80697	5.32773	7.47752	5.11282	5.83383	8.0088	4.43881	10.5373	6.07793	7.36194	9.13631	5.48248	3.88398	6.82182	4.58863	7.10272	6.9635	6.94924	6.626	6.78077	9.78999	3.64975	4.70434	6.64502	7.25517	4.31137	8.23579	6.17703	5.12967	4.23333	6.90801	5.6168	5.13921	5.83232	4.6341	12.0413	5.801	5.73157	5.85684	6.84153	5.20217
NO	ATDNATA1	14.4837	17.0496	6.89107	6.79169	13.1978	5.95189	5.80855	8.6227	5.32841	4.81622	4.65406	5.43095	3.8517	7.60038	11.6432	8.55367	10.6382	6.44115	6.30757	6.58106	6.09488	5.86134	9.20792	9.59772	9.01334	8.40711	8.70115	7.62523	7.44887	11.2675	8.7182	10.6043	6.24214	6.74352	9.41117	5.3168	10.415	12.3101	9.49802	7.54843	6.96085	5.42889	10.2587	11.6846	6.45131	8.77635	6.40152	5.67438
YES	ATENSPM1	7.1683	7.25276	7.83367	8.99798	8.2374	7.25522	4.83996	6.74735	7.83194	7.17675	9.2089	9.9163	5.97763	9.05926	7.48841	7.66593	7.4692	9.59152	8.26223	8.34704	7.28762	7.70673	7.13027	7.895	8.21404	7.59422	7.92946	8.27914	10.1201	9.48849	8.42072	7.38698	6.7757	5.27222	8.64126	7.02833	4.752	5.15472	6.93882	7.02716	9.11824	6.96371	4.51161	8.41335	4.97208	6.11784	9.92004	6.97181
YES	ATENSPM10	7.68621	7.10828	10.1675	8.14088	6.20474	9.19365	10.2806	8.86681	9.33673	7.42897	12.1304	9.06858	11.8147	11.4727	7.10115	7.05131	7.70323	9.92449	11.6477	10.8581	9.09328	8.33489	8.20609	6.18623	7.74109	9.86873	8.92469	7.93704	8.75279	8.79214	11.74	8.60926	6.32266	9.14364	8.70055	8.82534	12.1899	9.14564	8.02128	9.20062	11.911	11.9256	7.88858	8.85995	10.6762	7.8082	9.31798	11.5552
YES	ATENSPM11	7.93048	7.50179	9.90066	8.33667	7.14352	8.05486	10.4651	9.88246	8.92086	10.9135	10.1945	7.61328	13.446	6.07502	6.37882	10.353	9.33797	10.9754	7.56728	8.43925	8.30888	10.3901	7.66953	7.53298	8.29144	6.93393	10.1184	8.37519	11.2138	9.03147	9.80362	7.95897	9.4487	8.30195	8.43833	10.6138	10.7835	10.1475	7.78289	8.4873	6.89257	10.5751	8.026	7.50543	7.48132	7.90108	7.91926	12.8066
YES	ATENSPM1A	9.41628	9.7254	14.1239	10.468	10.0893	17.1157	11.4367	12.3757	20.4292	11.3789	17.1593	18.3919	15.7243	13.6164	15.7041	11.2102	16.4912	10.8814	19.0919	17.4829	19.8859	12.5081	18.6744	15.3152	17.5768	17.8336	18.4801	17.1867	19.0369	12.7573	9.77237	10.9262	9.696	16.0808	14.1615	13.9959	17.4846	9.5471	14.4584	11.9312	16.7483	10.8165	9.05696	7.74837	23.795	17.6645	15.1942	9.47908
YES	ATENSPM2	9.62857	9.88351	11.0719	13.6249	9.20767	15.6532	12.023	12.8986	18.8855	13.6268	15.9742	11.1462	14.9342	10.8186	9.41389	13.7273	12.3974	16.5099	13.1432	18.1241	13.7929	13.518	13.0981	9.68243	16.7339	15.0479	12.2989	16.0709	13.8632	13.8818	15.2533	10.856	14.5046	13.0327	16.4723	14.6037	17.4724	9.71607	13.5262	17.4533	11.309	20.0013	11.4197	11.2691	17.2463	12.6263	16.8682	13.1341
YES	ATENSPM3	12.0619	11.7486	10.9669	14.9123	8.64331	12.3469	13.1721	12.8433	11.8782	18.536	13.7262	13.4379	14.1994	11.6504	11.089	10.4672	11.2708	16.2546	15.1161	9.5798	10.8926	10.9155	10.0075	11.404	11.61	11.1563	10.1944	10.4849	10.6889	10.8379	13.2373	10.5544	12.6737	11.9207	12.7236	16.1648	8.64535	9.83831	10.0856	11.2035	10.5613	11.3697	10.5386	11.0539	10.188	10.7353	10.8983	13.3807
YES	ATENSPM4	7.70734	7.85608	8.84092	9.42619	6.72164	8.57917	10.6948	8.17902	10.1148	13.492	8.21617	12.8425	8.7763	8.63888	8.44564	8.00339	9.23536	9.29168	8.74832	9.99488	10.0658	7.89128	9.89219	9.76935	9.70629	8.8035	7.90536	9.26301	7.85062	9.96893	9.8389	11.9281	11.257	9.87444	9.35966	9.90214	7.94882	6.7556	8.83253	9.42177	9.18485	10.0557	9.38712	7.76805	8.67928	8.37294	12.813	10.9841
YES	ATENSPM5	19.7255	20.8845	27.8027	28.9408	23.1789	27.1275	26.9876	23.5691	29.2792	19.9358	30.5872	32.5783	35.8625	23.1097	21.4647	20.5778	22.8802	20.9498	21.2996	28.4295	27.0005	35.3089	24.9056	19.9684	24.6612	25.5158	28.9422	30.5546	30.9819	36.0171	17.1879	21.8175	25.8525	22.245	23.3793	28.1622	27.758	27.0149	25.1739	34.7481	24.0278	30.988	22.5125	13.2483	35.1665	28.8426	25.8734	26.961
YES	ATENSPM6	12.1705	12.6257	15.2774	18.2046	10.9226	15.4676	18.811	10.4392	18.0964	15.0266	13.6511	17.706	18.3803	11.8887	12.5187	15.7031	11.8217	12.4611	12.9313	13.3424	16.4795	17.2554	15.7193	15.2162	13.5402	14.7655	14.875	16.0486	13.8872	15.5261	10.4802	10.5233	16.3146	12.4684	13.3806	16.4879	10.991	10.7561	11.6926	19.398	14.6398	16.0001	11.4906	11.6985	16.604	15.8315	12.2036	12.1733
YES	ATENSPM7	13.6357	13.125	15.6281	14.3219	10.6658	17.3109	14.77	17.2094	20.022	20.745	20.9647	16.5483	15.7772	13.0388	12.5062	16.7431	12.2109	16.9739	18.6806	18.485	16.2123	16.3099	14.8927	14.387	14.5723	16.3293	15.9229	13.6038	17.7741	13.9471	14.3399	15.9395	19.5269	12.9031	15.1244	15.7085	14.4549	16.6194	15.5186	15.9839	13.2779	16.3752	17.4403	12.8677	17.2262	13.7448	18.4754	19.7111
YES	ATENSPM8	0.990332	0.847314	1.0037	1.04114	1.23125	0.484483	1.03494	1.05958	0.430436	0.463013	0.519106	0.868067	0.392077	0.447787	0.520499	1.20473	1.18805	0.439613	0.939359	1.02439	0.988002	0.960815	0.976509	1.22072	1.14433	1.01713	0.587923	0.462839	0.967762	0.982117	0.453754	0.564368	1.01809	1.06469	1.13459	0.45391	1.01467	0.566921	1.01887	1.10715	0.578732	0.941401	0.437811	0.834161	0.884306	0.538555	1.0819	0.958774
YES	ATENSPM9	8.38121	8.36466	15.1126	13.9617	10.6687	14.4492	15.3081	20.1478	16.4462	16.6558	15.5795	12.4697	15.3028	14.847	16.2656	11.3548	16.2658	12.0687	13.768	11.8531	19.6394	11.6764	18.6746	15.7921	13.6934	11.9651	14.1618	14.4926	13.7151	10.401	13.6665	13.5182	12.1261	11.6517	17.7366	16.8244	12.4625	15.1679	17.2416	18.0645	10.6636	18.4037	14.0202	10.6681	13.6996	11.9214	17.6416	17.4075
YES	ATGP1	36.7822	40.6296	44.411	44.6807	31.4995	56.9193	54.0851	42.9399	43.3567	48.6221	53.8604	63.4883	66.9208	50.9511	33.1769	35.6882	36.7291	50.0246	47.425	41.5302	53.8043	57.1159	50.5199	41.4997	41.0838	40.7496	33.621	44.6006	43.8712	51.7761	39.6212	31.1627	43.8147	43.4115	40.1755	56.3243	49.1829	31.5792	45.6038	45.0657	50.2129	53.8335	26.9094	26.4418	52.4141	40.528	42.9468	46.0776
YES	ATGP10	11.3945	12.0678	11.9571	12.9401	12.3016	13.1878	14.9332	13.4777	12.4757	14.5896	10.5607	11.3059	14.3401	10.0424	12.4743	7.98249	9.01463	11.6559	14.2429	16.0942	16.1105	10.9777	15.31	12.8537	12.3568	13.6871	12.6831	12.3906	11.8706	13.9293	13.3272	13.7831	13.2893	16.7749	9.67215	11.7705	10.6351	6.87148	8.72745	11.7113	10.6454	14.6984	11.4901	13.8935	12.0861	9.91357	11.4291	12.2004
YES	ATGP2	16.5004	19.4478	14.9336	9.66642	6.85507	15.7357	12.649	14.4599	12.7161	13.795	12.6693	15.1228	17.2744	12.9463	7.98685	10.2374	7.05882	9.30259	10.724	17.139	10.7881	11.8615	10.211	7.668	8.86432	6.68053	6.02538	9.31444	11.5745	11.4418	12.0808	9.8648	15.757	7.98655	7.55042	19.306	16.7874	8.74927	9.32543	14.4998	11.1552	13.6398	9.1185	8.36513	10.357	5.61357	19.1492	15.1307
YES	ATGP2N	7.39661	8.32241	26.1811	28.3255	19.2396	46.2954	27.4981	29.0975	85.581	33.9589	32.3476	29.1656	28.4017	24.6554	22.0103	20.6906	22.5154	32.4787	42.9464	47.0753	31.6987	56.177	30.1725	19.8617	34.5815	34.6934	32.3924	33.9228	32.1516	27.1539	24.6475	18.4601	22.3588	28.5563	32.309	49.5167	36.0207	19.5963	29.6507	25.7711	23.0743	65.2516	24.6255	18.1769	46.7337	18.2079	58.8175	25.5786
YES	ATGP3	21.3568	21.1197	20.7253	17.5069	17.4026	26.3964	22.6876	19.8481	23.9857	22.3956	29.9215	23.663	32.7116	18.3514	24.3814	17.519	18.0992	17.6231	23.8348	19.1663	24.2835	22.4886	22.0387	19.1018	23.6062	18.2134	26.7224	19.8367	21.365	22.2264	21.0399	15.5081	19.1653	24.6145	20.3004	30.2827	21.3867	17.8007	20.9472	19.4854	20.2517	23.8783	15.5168	15.6321	28.1843	17.8675	30.9761	23.0438
YES	ATGP5	6.72185	6.65213	9.39454	8.14655	6.23694	9.94781	9.55459	8.56721	8.56383	8.51596	13.8172	11.0142	10.3257	8.63946	8.21334	7.56332	7.3704	8.73961	8.98693	8.32524	10.6956	10.3345	9.92279	8.46591	8.28464	7.9571	9.13617	8.30394	8.51337	7.34889	8.01663	9.81173	8.84377	9.15586	6.73732	9.10133	11.1919	10.0938	7.67563	5.95901	11.2213	7.49992	8.01546	10.0578	7.11867	7.27214	9.56429	8.97426
YES	ATGP6	2.07876	2.09864	3.02826	1.73044	4.50012	3.25827	1.68934	5.21142	4.94954	1.6182	6.956	4.63612	3.82945	5.34185	1.44495	2.44322	1.69903	3.08301	6.40403	4.2716	2.22127	1.01465	2.04021	1.80982	2.33193	3.71728	4.26353	2.02445	4.97773	3.87684	4.7502	2.71625	2.10887	5.30174	3.38112	4.69797	5.07985	3.7164	3.33175	3.34781	4.87682	4.07401	3.37428	1.85609	5.56198	2.49361	6.17002	5.73267
YES	ATGP7	9.06146	9.16535	11.934	12.1867	7.8393	16.885	6.53028	17.3064	14.8677	20.2871	12.8247	15.8387	12.3885	15.0015	11.5067	8.54996	7.25683	18.302	14.1882	9.11126	4.3575	11.0606	3.97819	9.53136	15.4206	14.5707	9.11927	5.27844	14.1981	15.8693	27.5752	8.02588	9.48065	9.9484	20.6703	15.7004	14.0994	14.5578	11.8442	8.68706	16.3519	11.3788	11.2127	16.4088	13.9941	13.7057	19.5698	13.78
YES	ATGP8	2.7133	2.76004	5.33531	1.81123	3.42597	5.04714	1.87093	3.3945	6.3534	5.16408	5.51236	1.85834	1.96064	5.56638	2.29552	3.87018	3.92195	3.83363	5.8616	3.13809	3.90223	5.00205	3.71702	3.26077	4.54703	5.06957	4.03746	4.16101	2.51559	4.73487	6.52164	2.71836	3.43192	3.37809	4.20285	3.00331	3.98395	3.99715	3.99602	3.17027	3.12303	3.12456	1.94604	2.37847	5.58066	3.77204	5.86814	3.86251
YES	ATGP9B	2.4635	2.82621	3.44105	4.34379	5.29423	2.38293	6.92218	2.11606	4.06775	3.18483	3.15601	3.41971	2.03845	1.22185	0.923852	5.80909	2.2005	7.5949	1.5435	6.83874	3.00236	3.56067	2.83512	6.55582	5.22758	3.08622	1.53104	6.88344	8.99621	2.63489	3.26651	3.62774	7.24373	7.02508	1.25075	4.50889	1.57514	2.71598	3.33692	6.42022	3.78321	1.80423	6.09093	1.89487	2.39714	6.84925	1.71493	3.48113
YES	ATGP9LTR	1.16063	1.03814	2.07387	1.71929	1.73562	1.93011	2.20105	1.55753	2.0783	1.98616	2.31105	2.4425	0.562608	0.187037	1.76024	1.2371	1.46706	1.88034	1.89085	1.70272	1.4875	2.15538	1.17931	1.67485	1.82997	1.79932	1.27787	1.99239	1.81235	1.8448	1.79569	1.45756	1.4328	2.11014	2.06107	2.46844	1.68827	1.33723	1.92384	2.35611	0.191092	2.2845	0.513674	0.528253	2.3768	1.73978	2.63276	1.50957
YES	ATHAT1	9.66551	9.60078	8.67977	9.17318	7.16172	13.9776	9.10189	9.36817	9.35439	9.41066	9.07666	9.7521	10.9549	9.57776	9.85558	8.7484	9.84305	12.0585	13.9407	11.503	8.73914	9.96437	8.3775	10.6237	6.55045	9.63799	7.23104	8.83085	11.1059	7.88902	9.73404	10.4044	11.385	9.09373	9.40535	10.1679	11.2043	10.9473	7.70815	5.77575	8.74501	6.77782	7.55587	12.5401	8.89505	11.9128	11.4022	8.6363
YES	ATHAT10	4.64488	4.53802	3.22949	4.38721	3.39302	5.00685	4.04737	4.45745	5.14506	4.34019	5.3468	5.61034	2.93571	4.40684	3.69501	4.14249	3.40405	3.33469	4.339	4.31015	4.15252	3.15123	4.31898	4.64639	4.02212	5.2215	5.53534	3.22634	5.18606	5.16389	5.0833	3.53466	4.24109	2.98784	4.4493	3.21491	5.40967	5.02675	4.66991	4.39903	4.45189	4.46167	4.86467	3.4817	5.11563	4.57738	4.44746	4.21169
YES	ATHAT2	1.9473	1.76931	2.48394	2.78508	4.22739	2.87108	2.95038	2.49399	4.06814	2.96161	4.31695	3.04674	4.49327	2.44521	2.60363	3.37388	2.5736	3.72404	2.95993	2.63799	3.89681	4.2923	3.65536	3.33851	3.74789	2.87725	3.74737	3.96933	4.67952	3.89656	2.57256	2.68138	2.57715	2.9991	4.26095	2.91253	3.81045	1.38604	3.22211	4.06339	4.2749	4.38623	4.67088	3.78978	2.99018	2.5052	3.03921	4.00979
YES	ATHAT3	5.34686	5.03819	8.26732	6.48085	4.2236	7.14006	7.89626	5.61679	6.64117	8.01563	8.39957	5.9201	10.7293	7.47635	3.96607	7.4163	2.81084	8.43228	8.45511	4.25391	8.1438	8.16113	7.35741	5.75442	7.35442	5.03051	7.54459	4.50076	11.1988	5.47991	5.19811	5.54637	7.88061	8.51289	7.14121	7.97625	5.17234	6.90375	5.70388	6.25386	8.18324	9.76369	8.5929	5.67899	4.50978	5.34413	7.05139	7.45136
YES	ATHAT7	6.24989	6.02757	8.67419	9.79569	6.08302	9.2096	9.04021	7.69768	8.20889	7.82826	9.35475	7.39966	10.4937	8.65338	6.78529	6.4443	7.65494	7.63315	8.95688	7.01109	9.81994	9.15363	9.04976	6.05714	8.14257	8.7504	6.38131	8.52143	7.03732	8.00743	7.75407	8.07123	8.78995	8.47974	8.91044	7.43856	8.69933	8.89819	8.401	9.97415	8.97927	12.2317	7.30646	8.00602	9.1872	7.38004	8.98509	9.97275
YES	ATHATN1	10.8248	10.7147	8.03285	8.17467	11.0345	6.70794	8.06386	8.45992	6.83881	7.04228	7.66523	6.37937	6.5927	8.8445	9.77609	10.4588	13.0414	6.70706	6.84031	7.60947	6.15885	7.82509	7.90053	11.3954	8.78427	9.57959	8.93038	8.35886	10.0859	7.48717	9.38159	11.1038	9.92194	8.19101	8.12569	6.14503	8.41269	11.5239	8.9259	7.38007	8.56831	6.25569	10.1858	13.6586	6.40556	10.807	7.10035	6.25764
YES	ATHATN10	21.9342	20.6242	17.3333	15.3521	21.0615	12.5312	15.39	14.6636	11.6302	11.348	14.016	13.6581	10.8929	15.1232	17.5833	22.8642	19.8174	15.5858	13.2687	16.7777	14.0902	13.2358	16.0723	20.0424	16.7098	17.7627	16.2214	16.4287	15.213	17.2631	15.6416	18.8615	20.5579	16.0889	12.696	11.755	13.4398	17.224	17.0243	14.1612	15.4804	12.3206	18.8318	18.0733	13.3206	19.3804	13.2542	11.4428
NO	ATHATN2	14.918	15.9497	9.80266	14.4779	20.101	9.88311	10.7657	14.6396	9.74757	10.949	11.2192	10.301	9.1286	14.2448	16.986	17.136	15.7161	13.4418	11.233	12.5726	9.77793	10.4476	12.1029	18.0544	15.0662	14.5883	15.0073	13.9245	14.3353	12.7716	13.2604	17.3883	12.8601	14.2172	12.6938	9.38463	13.4964	15.3022	13.5556	12.7769	14.553	10.7085	15.0559	17.4881	10.342	16.0684	9.67017	10.312
YES	ATHATN3	16.4787	17.9387	10.2026	11.7444	16.8588	8.73314	10.3262	13.2186	8.38429	8.79522	11.4405	7.90095	7.93293	11.7845	15.4185	14.9003	13.9722	11.6599	8.87373	12.55	8.26705	7.71851	10.7265	13.7184	13.107	13.5907	13.4494	11.8363	12.0748	13.7694	12.3993	15.187	11.3133	13.9642	12.063	9.21298	10.9155	15.916	13.0399	12.3722	11.946	9.10679	12.9992	15.2367	9.14684	12.669	8.67867	8.21881
NO	ATHATN3A	10.1817	9.90575	9.38848	7.57831	9.55847	7.18184	7.99438	8.92405	7.97374	7.90607	7.33796	8.66994	6.6698	10.0354	10.3251	10.7171	6.68122	8.75997	7.50358	7.42551	8.16586	8.50357	8.09356	10.3353	10.4586	11.5426	10.5824	9.17196	8.34625	8.8116	9.93307	8.59924	7.01647	10.8082	11.8522	7.0335	9.40341	10.5155	9.3735	7.89106	8.78168	8.60485	12.2284	10.5723	9.0043	10.1818	9.55047	8.29107
NO	ATHATN4	7.41367	8.34896	6.25644	5.79322	7.96512	5.64745	6.00716	5.55951	4.29221	5.18497	5.48832	4.81129	3.16249	6.34603	8.44261	7.34901	7.93688	6.9741	4.89108	5.33823	6.77223	5.971	7.32025	6.81859	5.79277	5.95041	6.45759	5.16947	6.90038	6.90084	6.25922	7.4438	7.679	6.99767	6.52813	4.20827	4.29454	7.71952	6.10826	4.64914	6.19952	4.73152	6.92399	8.78657	5.50551	6.95037	5.1221	3.92702
NO	ATHATN5	13.3281	13.2455	10.4669	10.4622	13.3864	6.96594	7.55053	10.3122	6.32107	6.58326	8.07362	7.29142	6.02916	10.8969	14.2936	13.3103	12.8894	8.47701	6.03071	9.97945	4.90776	7.15627	6.73961	10.9614	9.48919	11.6118	9.29037	10.2641	10.6432	8.55956	7.99241	11.991	10.2543	11.9135	9.57861	6.02809	11.0246	15.6245	10.4964	9.47912	8.29603	7.87153	10.0244	10.7334	7.68102	9.96641	8.26883	7.0637
YES	ATHATN6	11.1794	11.5437	7.16782	13.5817	9.03816	5.50895	8.88805	8.05917	7.97463	7.04941	7.28855	11.4247	9.81607	10.0039	12.1568	13.4581	12.6868	9.74572	10.0624	9.45298	7.33174	7.50726	8.19527	8.33785	12.5119	7.43033	11.4598	13.0235	10.2592	10.6428	9.4146	10.7411	9.27116	9.01884	11.827	6.69258	8.49365	10.4419	9.64503	9.58475	10.3732	9.17402	8.30834	7.35837	8.46912	8.46598	7.41378	7.01672
NO	ATHATN7	30.1182	30.4553	21.535	21.6375	39.3842	13.3272	17.8662	26.2804	16.1826	14.4215	17.8045	14.9981	14.0001	25.0619	33.3812	30.4903	28.6889	17.7509	14.4721	21.1654	16.684	17.5186	23.8071	24.7952	27.9637	24.9618	27.0825	28.3277	22.0148	25.2289	21.229	28.379	23.2924	26.0721	22.2093	15.0783	29.6915	31.2198	26.3544	18.9141	22.6833	14.3836	25.5452	41.4763	15.6321	29.1651	15.4618	17.1902
NO	ATHATN8	0.759559	1.01106	1.29259	1.10433	1.27931	0.960646	1.1379	0.851156	1.25288	1.20192	0.746384	1.1536	0.778996	0.521964	1.16409	0.888692	1.23095	0.925902	1.00562	0.954079	1.22897	1.24182	0.999186	0.953444	1.01951	1.34087	1.1617	0.954876	0.714058	1.24426	0.770975	0.869104	1.01629	0.937841	1.02736	0.786244	1.08243	0.705604	1.08075	1.11528	1.12362	1.11658	0.974449	0.945295	1.3002	0.963396	1.03622	1.12182
NO	ATHATN9	1.16892	0.999022	1.13442	0	0.00543231	0	0.00553722	0.0116997	0	0.744455	0.00456504	1.19633	0.00961724	0	1.17114	0.0336626	0.0187902	0.993548	0.00944247	0.00464272	0.00999161	0.0101789	0.00453145	0.0168751	1.22189	0.0202374	0.00774468	0.0091815	0.0045337	0	0.87182	0.712182	0.85524	0	0	0.00812655	0.0107705	0	0.0228867	0.00984791	1.05992	0	0.018442	1.03797	0	1.15608	0.00511712	0.0200774
YES	ATHILA	19.2811	19.8074	22.9828	22.5648	16.8709	28.3138	17.6244	20.7782	29.0304	24.5709	18.2321	19.6273	24.6241	16.1126	19.6536	20.2818	21.5233	29.8221	26.1493	19.6989	26.1914	17.372	25.0556	17.4439	23.2192	21.5523	20.1081	21.7849	20.513	31.4472	21.6109	24.1986	22.1869	21.6321	24.308	20.3633	25.9511	18.9885	19.6363	14.9918	23.5764	26.2987	18.9003	18.6233	24.0151	23.2772	23.3374	20.7303
YES	ATHILA0_I	17.1595	17.145	17.6501	19.9302	17.1397	21.5729	25.6743	19.7192	19.5969	27.7722	20.8584	31.4547	24.42	16.2669	19.285	19.054	16.581	23.5982	21.6683	20.4541	22.7231	24.7877	20.9772	14.7443	18.7505	18.2194	25.621	20.1077	20.4356	20.2771	19.3389	17.2943	22.0662	17.7909	20.6471	24.341	22.3298	19.6958	19.4481	22.8734	20.8875	25.7393	16.9201	16.661	26.1648	21.3466	19.5793	21.2439
YES	ATHILA2	71.3506	77.2093	88.1987	83.4958	59.4384	105.769	94.4549	109.782	114.207	114.303	109.757	123.116	108.256	93.2259	69.3526	75.3142	75.8074	89.6949	109.074	88.718	103.431	123.371	95.9526	86.0474	80.0792	82.2293	84.1335	89.1694	86.3931	96.3478	87.7306	72.2352	90.7042	78.327	91.9641	119.568	103.987	79.1397	87.419	97.2881	104.229	96.1675	62.503	70.1843	103.987	90.449	108.251	121.163
YES	ATHILA3	22.3047	22.7477	25.4163	23.7142	19.0536	31.3903	27.6085	30.4973	27.4653	32.0399	29.7011	27.4452	25.9276	25.9633	23.1879	23.4149	25.6439	31.2485	26.7503	25.1996	27.6389	27.3645	25.4593	22.7956	23.6154	24.1058	24.6421	24.5839	25.7193	29.4624	27.0273	26.5066	26.7208	26.169	24.8212	31.5529	30.1955	22.1405	24.1787	25.754	26.901	26.2892	22.479	20.1205	29.2979	22.4406	30.0318	36.2745
YES	ATHILA4	38.105	38.7356	38.8065	43.8078	40.7106	39.1394	39.9281	40.4427	40.4353	44.7395	38.6617	35.5203	33.0407	35.7591	38.6485	42.6786	42.7134	42.704	39.7414	38.1482	38.5063	38.6726	39.4365	45.9561	41.5567	44.0334	40.1791	41.5784	41.7563	39.9487	38.2153	50.4687	42.8117	43.409	39.1928	37.8138	41.7533	46.0233	43.4532	40.9313	38.6909	40.0489	44.6466	46.7048	37.6022	44.7476	42.9682	42.0788
NO	ATHILA4A	42.0813	43.1863	43.254	38.9106	33.9072	38.1752	35.2001	36.3517	37.1889	37.4182	36.0691	37.1184	36.218	34.6767	39.0581	35.3867	37.155	41.9639	42.2126	34.7086	36.7506	39.8463	36.2125	34.4906	31.5575	35.0306	38.9187	35.4375	36.3608	38.7117	42.1154	35.6672	34.5832	32.7535	31.9218	43.9241	33.9182	36.6943	33.2818	34.4421	38.5458	35.9083	37.2611	37.4332	34.2037	36.6901	38.6222	35.8213
NO	ATHILA4B_LTR	70.3403	70.8449	66.6112	68.8619	74.5413	69.7393	67.3135	67.1033	68.0436	75.2317	66.3996	62.6836	60.9061	67.2346	77.3269	68.3784	70.7	64.524	65.5306	65.5264	73.6345	64.6939	72.0522	70.8233	66.5431	66.4624	77.9802	68.7945	64.8943	65.4713	67.3067	72.2368	67.6986	70.9386	71.7597	66.59	65.4398	66.164	70.7635	65.1254	73.117	73.1714	76.0049	75.1497	65.6041	68.4762	68.3573	67.38
YES	ATHILA4C	21.0635	21.3193	18.5393	25.2117	18.9992	27.4308	28.7142	21.0501	24.1329	29.1286	26.7872	24.8433	27.4754	26.0062	22.8168	25.535	19.3003	24.3376	25.8944	22.4099	29.3877	26.3577	27.2501	22.7168	24.4771	20.5085	23.0174	24.2014	23.5091	23.7834	22.1026	25.1046	28.6538	22.8586	24.046	26.2663	21.6396	19.1203	22.1503	24.6379	24.0754	26.9763	20.7629	18.9369	25.1005	23.1373	26.6045	23.1114
NO	ATHILA4D_LTR	46.4593	45.8322	42.2192	39.7753	36.198	57.6033	43.1004	47.665	52.5474	53.9113	46.4555	52.5414	58.7093	37.2997	39.9565	41.9661	32.647	46.4223	52.7743	40.9567	61.3566	50.687	57.4548	35.6607	33.7639	34.4216	46.1829	40.4676	45.6599	48.8101	42.0128	38.7858	47.9369	36.7688	35.8983	56.9667	37.1807	37.8822	44.9263	43.0929	44.4908	44.8726	34.924	38.38	49.1373	41.9746	46.3412	50.5605
YES	ATHILA5	5.93521	6.12966	7.96533	4.82998	7.30827	7.60632	6.14248	8.96455	7.92017	6.65771	7.58683	14.1784	7.54134	7.08909	5.37366	4.64191	5.35906	7.02043	9.14914	5.57229	8.56454	3.73273	8.19621	6.18232	5.28171	5.92263	9.74839	6.55242	8.72785	8.57016	6.34215	3.0459	6.80778	7.14346	5.93354	6.37713	5.9313	8.05689	6.41735	8.09302	6.76195	8.61096	4.8183	3.4057	9.13178	5.43051	9.06391	6.49124
YES	ATHILA6A	40.2184	42.7377	63.6093	50.9127	37.4449	64.056	53.835	57.8859	86.0409	61.2694	70.2949	46.1718	57.7139	50.5531	38.8213	35.4703	59.9506	55.0895	71.2465	52.7431	66.0749	48.139	61.3839	44.9176	51.0726	48.0481	55.2358	55.5452	53.5221	59.1121	62.3278	41.9998	41.9424	47.7326	53.3187	68.2215	46.0912	37.7029	54.6807	50.5314	56.0177	54.9096	46.0667	38.8671	60.3596	51.7378	51.2134	55.3766
YES	ATHILA6B	17.3706	18.3238	18.9806	10.9669	9.26396	18.7379	13.0179	25.08	28.465	18.9736	21.2994	20.7546	14.2664	14.7841	10.9806	12.1583	13.8343	12.8845	24.4916	16.9705	19.7579	20.6296	18.2509	14.4649	12.3718	13.2886	17.4413	13.9554	14.6815	23.3564	16.8079	13.0276	14.2888	13.3677	16.7792	19.4136	16.7061	14.9587	15.4528	13.387	14.3237	14.1259	10.3325	13.6505	21.1631	19.0137	12.9262	26.0981
YES	ATHILA7	3.38301	3.39332	2.40597	3.78724	2.4347	3.32942	4.21935	5.86746	3.54802	3.63657	3.74058	6.46383	3.51097	4.17677	3.07764	3.32842	2.74092	3.34894	3.96334	2.39439	2.93578	4.41964	2.73408	2.6337	2.52746	4.99795	2.92897	4.27295	4.28998	3.14377	3.61582	2.91944	4.0393	2.55175	3.97208	3.65158	4.29829	2.61424	3.7618	3.77189	2.71551	2.28356	3.66898	3.27357	4.93301	3.70038	5.39112	4.946
YES	ATHILA7A	2.12529	2.13378	1.80611	0.214283	0.344832	1.99218	1.8687	1.69987	2.59334	1.78919	1.91819	1.8046	1.13233	2.96938	0.863702	0.696052	2.85879	3.59034	1.3764	2.5193	1.45883	2.21203	1.3211	1.72341	0.211418	3.58036	1.33719	1.51168	2.39571	0.559075	3.06016	1.80379	2.23016	0.0318758	0.830262	2.06278	2.05812	1.04658	1.39029	0.149915	1.85913	0.0171295	2.87544	2.0157	2.08532	0.211238	0.737749	0.25163
YES	ATHILA8A	2.742	2.87871	2.73473	3.59057	2.48698	4.64985	3.76204	2.40032	3.10316	4.08101	2.82133	3.59722	3.5792	2.70636	4.02665	3.806	2.67955	3.28369	2.12325	2.55541	3.00157	3.35486	2.87968	2.7496	2.45241	3.16853	2.72083	2.46769	2.88356	1.8111	2.0524	2.79921	1.96595	3.32624	2.52213	3.94746	2.27855	2.29115	1.62298	2.45487	2.42231	2.57275	2.5579	2.22526	3.20548	3.23058	2.47732	2.44197
YES	ATHILA8B	1.00636	0.998274	1.37175	1.31308	0.975497	1.42819	1.43046	1.34442	1.46739	1.45687	1.4738	0.000567274	0.00640116	0.00956389	1.08308	1.15783	1.18035	1.31937	1.5509	1.2657	1.49502	0.00302464	1.38669	1.1946	1.25705	1.30561	1.23715	1.29167	0.00249712	1.27893	1.33738	1.10832	1.37024	1.38393	0.0103198	1.57993	0.0047354	0.00777826	0.472109	1.36802	1.3495	0.00537024	1.11537	0.734187	0.00375524	1.22557	0.00606808	1.49643
YES	ATHPOGO	0.981	0.918804	34.0835	40.1263	76.491	24.8791	27.6469	40.3032	25.2694	23.8073	25.4896	24.8533	23.0234	42.2921	51.4551	54.2326	52.6808	34.4256	26.5337	37.3773	25.6556	27.0848	39.7295	49.6271	48.1443	41.8528	42.345	42.1876	41.3444	40.915	36.8842	54.5664	37.7237	38.3121	38.7491	23.4538	40.1258	54.715	47.8803	36.3137	35.7395	27.6453	65.7908	66.0411	23.6193	46.2057	25.9784	21.5131
YES	ATHPOGON1	66.1174	59.8317	10.3385	8.59395	14.6427	5.99229	8.6859	10.494	7.04918	7.53967	8.06515	5.33669	7.59227	10.1148	13.9641	12.1401	13.8171	9.39265	8.65845	9.57745	8.53979	8.04594	10.5397	10.8271	11.4188	11.7294	11.146	9.25743	9.45279	8.47898	10.5565	13.6382	10.6846	9.57041	9.94757	7.75479	10.1972	11.9028	10.8032	8.59864	11.0203	7.16742	13.0741	13.5847	8.19366	12.2222	8.72032	7.97674
YES	ATHPOGON2	13.7859	13.0839	33.5839	34.2606	56.3046	26.7114	27.4113	38.7617	24.6248	24.1861	24.2993	22.9233	24.0698	36.9968	47.5328	48.5014	49.8842	31.0332	23.8911	34.184	25.7533	24.478	34.9006	44.8679	47.2506	39.6416	37.6836	38.7282	35.712	34.5303	35.3224	51.4369	34.9467	36.7137	37.9591	23.4774	39.2167	47.9883	38.4069	33.3423	33.0633	25.8816	49.5869	51.7831	23.5968	45.2864	28.0785	24.773
YES	ATHPOGON3	55.2566	50.4945	1.88069	0.945987	1.13599	0.986618	1.02398	0.00176701	1.79282	1.09947	0.309494	1.96829	2.54383	1.12645	2.03775	2.07095	1.02583	0.768042	1.73594	0.305365	2.49809	0.915436	2.43004	1.13115	2.07587	2.12771	1.88947	2.04508	1.86039	0.00298075	0.0193815	0.0577049	0	1.95623	1.04022	0.978288	0.0113621	0.0338411	0.695286	1.0511	1.87774	1.04858	2.44156	0.0273335	2.06695	2.02426	0.0178956	0
YES	ATIS112A	13.7408	13.262	13.9431	14.9736	9.15891	9.85955	10.2728	10.7401	12.0817	16.7937	14.6042	9.52065	16.952	12.942	11.0463	11.4231	12.4467	12.5385	13.5664	9.72107	14.0112	12.9208	12.6925	13.1778	12.8871	12.9541	13.527	13.6902	9.85459	9.47293	16.2849	14.0086	12.0609	10.8291	15.7462	16.3488	10.252	11.363	13.3586	14.4749	9.47952	10.113	12.3106	7.56843	14.7077	12.9485	17.0426	12.1519
YES	ATLANTYS1	18.4171	20.8357	29.2622	29.701	20.5755	33.0495	33.0849	28.996	33.0611	29.8628	26.6279	29.0304	30.9142	25.4276	25.0308	23.6165	24.8845	34.5485	29.7953	29.7403	29.4867	32.4208	28.6769	21.3792	26.4915	27.2427	22.1103	25.1445	29.5929	30.6093	25.2551	23.6886	32.1005	31.1533	24.0261	31.0552	29.8157	18.1241	26.2609	32.4502	29.5924	31.5593	18.8396	15.9023	26.9256	24.0681	26.5672	32.548
YES	ATLANTYS2	20.2318	23.3112	31.7818	24.6967	19.8948	35.6533	26.1906	26.9571	40.1791	25.8788	31.3672	29.7568	32.5929	28.9751	21.735	20.7345	24.2022	30.5593	39.4523	28.3332	27.6504	32.3848	27.3255	25.9571	23.9074	29.2454	28.4457	27.1265	29.0922	22.6894	32.807	21.7078	26.8577	26.1461	25.7235	27.2412	40.8228	25.396	22.076	25.5601	31.7442	31.2645	22.8783	21.079	33.5222	24.687	33.4152	30.4362
YES	ATLANTYS3	7.50616	8.42925	13.7761	10.5272	12.7064	13.9465	10.4275	13.0877	15.6075	14.8417	11.6436	10.1328	15.9305	10.3224	10.8025	10.6873	10.9875	11.8095	13.5823	12.5813	16.1115	16.8451	15.1491	9.30997	13.4695	12.6503	12.5624	13.0971	10.8583	12.3602	10.4844	11.0806	11.6832	13.846	10.6568	14.2568	18.3954	11.2175	10.0682	11.9959	11.768	12.9898	11.5539	8.71626	11.9748	10.8551	12.4986	13.3756
YES	ATLINE1_1	7.01517	7.42049	8.09269	7.72946	4.85789	10.0387	10.8244	9.94278	10.7604	7.30825	10.5869	7.97261	12.2876	10.6587	8.69365	6.79166	8.49247	10.1091	10.1414	9.11223	6.03565	9.469	5.57524	8.91448	7.22184	6.51417	4.70601	9.11725	9.04446	8.96758	8.71552	5.27869	8.25983	10.5608	7.84593	9.8725	9.06772	5.60298	7.25881	6.79753	8.99446	8.86223	5.10121	5.76831	9.72228	8.31042	9.58571	11.8856
YES	ATLINE1_2	6.07677	6.38547	5.58937	4.80655	4.07097	5.70353	5.10202	5.21096	7.15638	6.49093	5.31951	7.72355	9.25147	7.33518	5.84616	4.4431	4.28533	7.33013	5.89533	5.88653	6.81315	6.10633	6.49339	5.03914	6.47482	6.38952	7.2673	5.52274	7.24983	8.9392	4.79738	5.22151	6.14199	6.81284	7.40921	6.24306	6.06124	4.01302	5.19061	4.75769	5.65981	8.04594	4.00414	4.07249	5.59439	4.89099	6.70803	6.13512
NO	ATLINE1_3A	4.33559	5.42893	6.46856	5.06528	4.58311	5.32959	5.96757	4.35422	5.18818	6.91434	4.74895	5.40672	6.20078	5.69905	4.88995	4.71315	6.00847	4.74974	5.61625	5.22346	5.52296	4.81633	5.55837	5.22565	4.7008	6.22312	6.06493	4.97799	5.04212	6.49519	6.05471	5.55272	6.94386	4.0194	6.54709	5.16856	5.56875	5.6198	5.64326	5.25541	5.36557	6.0609	5.6022	3.58135	5.42153	5.13329	7.12259	4.60198
NO	ATLINE1_4	4.63376	4.63365	6.13807	3.79389	3.13082	3.52003	3.7023	4.94256	3.90565	3.81283	4.56181	6.15516	4.20548	3.64374	4.87268	4.56943	3.60397	4.97648	3.70785	3.6047	3.48721	3.73303	3.27599	3.06131	3.68536	6.23765	3.63217	3.18353	3.32731	4.58992	5.81176	3.38544	3.6602	3.46602	3.75889	3.71583	3.57413	4.86532	5.33015	2.63454	3.86807	5.04073	2.46014	5.5355	2.90874	3.80789	2.78949	5.36354
YES	ATLINE1_5	1.58528	1.74291	2.58214	2.58968	2.15271	2.39117	1.32549	2.66804	1.32341	2.7579	2.4552	1.49186	1.4496	2.80374	2.43579	2.30212	2.37069	2.67681	2.8369	2.47938	1.34876	3.23095	1.33518	1.18089	2.52408	2.57758	2.45949	2.70894	2.45733	2.29049	2.45855	2.35265	2.53771	2.79851	2.71846	2.65006	2.51261	2.41455	2.46851	2.66656	1.40173	2.77982	1.18914	2.38875	2.85018	2.62455	2.65052	2.72395
NO	ATLINE1_6	28.4818	28.6973	26.147	23.5507	20.3063	23.2244	27.1919	22.1715	26.7153	28.4138	29.0912	26.4545	29.0883	25.0037	23.2312	25.2817	21.8488	20.6368	25.4409	20.9459	27.4569	26.4279	26.1004	24.0212	21.7224	29.6457	22.2872	23.3443	29.7359	19.884	25.6284	15.1757	25.2167	29.0216	27.648	27.892	17.6537	16.2656	21.9008	21.0854	24.8583	23.3059	21.3658	18.5106	28.0378	23.5059	18.663	21.7485
YES	ATLINE1A	34.4772	34.1463	34.5306	34.6641	31.7749	35.6676	35.6892	37.9811	32.8586	33.2788	38.3673	36.94	38.1832	38.6339	38.1196	29.858	34.2353	34.7067	35.9002	35.3367	33.5154	34.7948	32.5823	35.021	36.8908	34.704	39.599	35.0085	37.5143	30.4578	34.6624	37.6508	32.0175	36.6213	39.7527	35.3708	34.9431	33.6289	37.5053	32.6587	38.6766	38.2208	31.9908	40.392	33.2252	42.012	39.7239	36.1533
YES	ATLINE2	11.0171	10.9609	15.9021	12.1266	10.263	13.3346	14.4616	12.0607	12.0036	13.1538	12.6887	17.5738	14.0962	14.3101	11.6246	11.6476	11.1037	13.1438	11.9236	12.5776	12.2603	14.2628	10.9162	10.9471	14.4641	12.2059	16.1157	9.63612	14.0153	13.6684	13.9683	12.0975	11.5688	11.8364	11.5642	12.0725	11.4529	14.8324	15.7151	12.3875	13.7162	12.7519	9.2719	11.1925	16.0895	13.187	14.8673	12.055
YES	ATLINEIII	23.7705	23.8033	27.6207	22.9624	18.6052	24.633	25.0856	20.284	29.7439	26.5916	24.3849	22.3091	32.129	26.4817	23.4979	24.6385	26.0097	18.3332	21.6422	20.9221	25.7105	22.3941	23.7141	28.0062	23.8682	21.9624	18.5643	24.9354	24.2848	21.761	22.4083	21.3154	22.3246	23.8215	27.6559	26.8856	20.5091	25.7467	20.7757	22.3436	28.4197	27.0027	25.0145	17.643	24.3171	20.0315	26.1594	20.0915
YES	ATMU1	3.0724	3.05102	4.84609	1.70975	2.78959	4.65752	4.86107	3.00842	4.92376	4.85185	1.46513	5.074	7.025	3.0417	4.08075	4.8097	2.49074	4.24148	1.65603	4.06307	5.19191	5.23955	4.67891	3.13242	3.83807	4.08924	6.71197	4.63206	4.25238	4.77028	4.59032	4.08888	4.11788	3.03389	4.39927	3.29795	3.36745	2.55784	5.55009	1.4638	4.88858	3.20368	3.14184	3.57347	3.17652	1.30848	6.31199	5.34417
YES	ATMU10	2.06141	1.98232	2.94585	1.53243	1.12924	1.79669	1.6958	0.00324321	3.15204	3.25409	0.00593819	3.52603	3.93039	3.19592	1.33468	0.0821034	1.28835	3.03542	3.38809	3.03219	1.79189	3.58082	1.54628	0.00548637	1.39262	1.45987	1.29682	3.01383	1.5351	2.89526	1.37742	2.53276	2.83634	1.5742	3.06784	3.57261	0.00265326	1.30482	2.3795	1.62228	1.55065	1.63832	2.40353	0.874647	1.72544	0.0100888	1.68086	0.00437396
YES	ATMU11	2.05954	1.93645	1.1415	2.10152	2.12054	2.10774	2.89096	2.80233	2.16721	2.89677	2.80756	1.2539	3.17211	1.87116	1.25131	2.31283	1.99938	2.73773	0.87563	2.08048	2.6611	1.3697	2.55501	2.62915	2.52141	2.71501	1.13447	2.87174	2.65847	0.681504	0.639549	1.23435	2.44654	1.36918	1.34222	2.17774	0.61362	0.779264	2.38582	2.88689	1.39074	2.96207	2.53021	2.44486	1.53621	0.661166	2.34922	3.29108
YES	ATMU2	2.07312	1.96535	1.13733	1.4538	0.949248	0.0170738	1.53962	3.00688	1.58947	1.68663	1.73735	1.23853	1.14583	3.17907	0.991877	1.47529	1.2752	1.63272	1.34291	2.97792	1.57885	1.70758	1.38256	1.32346	1.41384	1.4685	1.18809	1.50183	1.46032	1.17256	1.04547	1.15568	1.58715	1.57485	1.97553	3.47072	2.88453	1.35601	3.01346	1.46089	1.82561	1.82048	1.11715	0.0467964	1.52076	1.23926	1.6437	2.42343
YES	ATMU3	3.29916	3.17753	11.1889	9.89084	10.3333	8.63939	12.1497	10.567	10.3939	8.13357	11.9791	11.6047	9.88288	11.3053	9.89847	11.405	13.6617	9.72758	10.8733	10.7339	9.01017	11.9116	8.41648	8.694	9.27854	12.2931	10.1518	10.8159	9.78707	11.1328	8.11064	12.2838	8.93279	9.97795	9.28621	8.8238	9.55413	8.89891	8.98789	11.0634	11.5911	8.58558	11.2914	8.43679	11.7839	9.12845	8.89285	9.06281
YES	ATMU3N1	9.02178	9.11449	4.42015	5.68211	3.49281	4.58136	6.16186	3.27885	3.23803	4.87156	5.69717	6.25003	6.08414	5.4759	2.77567	5.8927	2.66297	3.01229	6.39421	6.34217	2.90754	2.14379	2.85391	5.36805	4.11195	3.61527	4.20277	5.79047	4.23148	4.40655	4.08248	3.90768	4.07959	2.98018	4.50841	5.11259	2.90595	3.94485	5.43484	5.58865	4.20504	4.39429	4.74519	2.86182	5.00206	4.78843	3.15174	3.20215
YES	ATMU4	1.07442	1.01285	2.20441	4.32245	0.554398	1.45693	1.54969	0.00261506	2.18531	2.99411	1.43284	1.42627	0.00281207	1.47646	0.57033	0.0322582	2.54448	4.41812	3.17042	0.00338128	0.00716051	0.00350419	0.0046304	5.84467	0.722323	2.05938	0.0030851	0.00974355	0.665651	0.151338	4.18748	1.25106	1.4649	1.48499	1.53835	3.25944	1.43106	0.00988153	1.6239	0.00250042	2.15273	2.23289	0.0115833	3.66667	3.17171	0.00244738	1.59912	3.48859
YES	ATMU5	0.881108	0.893458	2.74409	2.76981	2.13081	1.60592	2.98251	3.07096	3.12581	1.60172	1.63204	3.41858	3.71309	1.64123	2.51528	2.42613	1.27058	2.83639	3.2273	1.37681	3.15359	1.66582	2.86893	1.29429	2.55199	2.73277	2.78153	1.42661	1.46346	2.85132	2.636	2.21702	2.71581	3.03377	1.3846	1.8202	3.01792	1.21484	2.75633	3.13317	3.04971	3.15693	2.2456	1.08261	3.26019	1.24076	3.40739	3.66756
YES	ATMU6	1.06045	0.935589	4.72042	7.26459	8.14177	6.41642	6.11158	5.55574	6.61017	3.7489	6.71997	4.62435	6.3093	7.23912	5.12098	6.15484	5.71774	7.78406	4.05791	5.33602	5.07601	6.03084	4.61661	7.61691	5.12386	6.03352	5.9994	4.88766	5.61655	8.32699	7.58869	7.96935	4.7762	6.02022	6.23429	4.68973	5.73921	5.3865	5.6059	5.61875	5.31386	4.80887	5.99289	4.54651	7.47602	5.03659	6.175	6.1565
YES	ATMU6N1	6.46236	6.08191	1.04819	1.46541	1.18398	1.42771	1.485	1.06803	1.38618	1.57053	1.27297	1.5069	1.35849	1.39555	1.2937	1.11585	1.27811	1.35617	1.53541	1.43247	1.43547	1.4473	1.35776	1.38937	1.32075	1.40947	1.26891	1.51266	1.35943	1.44805	1.33011	1.10369	1.37951	1.28565	1.5886	1.3365	0.981979	1.31009	1.45434	1.45588	1.28156	1.50812	1.18705	1.14676	1.59798	1.21921	1.21192	1.27517
YES	ATMU7	1.85113	1.98041	0.0265684	0.0266299	0.0400939	0.0192705	1.58864	0.03158	0.0282802	0.0220276	0.0214486	0.0175141	0.125497	0.0351262	0.032164	0.0189555	0.0213116	0.0265023	0.0244466	0.0313435	0.0234929	0.0204021	0.0237037	0.0350393	0.0677518	0.0299231	1.30116	0.0276378	0.0221323	2.58737	0.024882	0.0324469	0.0303848	0.0357247	0.0354888	0.0153627	0.0243932	0.0287038	1.41505	0.0228215	0.0279531	0.0252024	0.0505774	1.4472	1.4779	1.28646	0.022027	0.019402
YES	ATMU8	1.12789	1.02219	1.44701	1.37555	1.4805	1.48618	2.01753	1.55296	1.48138	1.6468	1.2567	1.64006	1.92512	1.57652	1.24354	1.67676	1.68437	1.41259	1.55465	1.96442	1.53166	1.63628	1.42328	1.34832	1.34367	1.83582	1.25836	1.43398	1.4315	1.3581	1.77492	1.75617	1.2471	1.83686	1.47874	2.17493	1.44051	1.38614	1.85781	1.57189	1.49188	1.59059	1.3571	1.20284	2.30402	1.67762	2.13118	1.87902
YES	ATMU9	1.9043	1.95475	0.220408	2.64067	0.115165	3.35501	4.62859	1.54835	1.66525	0.267787	1.81983	1.85336	2.08665	1.86592	0.158315	1.28974	1.27321	0.160476	1.9102	1.16831	3.53716	1.91629	3.12411	0.308169	1.58111	1.43399	2.76427	1.08665	3.2602	1.7442	2.51905	1.21443	1.51726	3.08875	0.226282	0.20532	2.86146	0.164518	0.755366	3.02255	1.68725	1.74215	2.4002	1.25523	3.79362	0.209996	1.65608	1.67399
YES	ATMUN1	29.027	27.6111	15.2774	18.9837	26.3082	15.7691	13.7598	18.8083	13.0121	12.3677	16.0979	15.8139	13.815	17.4377	24.22	21.2619	22.4757	12.7823	17.1526	21.184	14.1043	13.1549	18.0006	19.4009	18.019	24.0692	24.752	20.3207	20.4111	16.3271	19.2652	22.5181	17.0552	19.8602	20.3656	13.3447	20.905	24.3473	19.9865	16.8396	20.5879	13.7735	21.3525	26.5586	15.0888	18.4008	12.8154	11.8832
NO	ATMUN2	2.98435	2.97423	3.21201	3.30507	3.16642	3.24062	2.26367	3.52544	3.2268	3.46218	3.35847	3.258	3.35915	2.1382	3.74355	3.42116	3.49454	3.39402	3.73522	3.28142	3.60539	3.59019	3.19746	3.72122	3.40188	2.45443	3.32014	3.54027	3.43912	3.10038	3.28216	2.9456	3.1496	3.69588	2.43777	3.11528	3.18135	3.26141	2.61202	2.31807	2.16757	2.09824	2.33941	3.41584	3.57487	3.64618	3.84255	3.57064
NO	ATMUNX1	0.834095	0.93884	0.811276	0.00697837	1.26301	0.0425975	0.0332233	0.845306	0.590817	0.609487	0.0559218	0.0296709	0.046884	0.813394	0.0552648	0.911415	1.09495	0.824433	0.652711	0.829886	0.704409	0.651449	0.864375	0.0253127	0.925963	0.854701	0.919681	0.957936	0.791131	0.747423	0.868567	1.11656	1.03295	0.879784	0.923783	0.580033	0.0376967	0.868728	0.831275	0.0160029	0.0636974	0.00962569	0.98652	0.157549	0.721873	0.863278	0.65755	0.0175677
YES	ATN9_1	35.9244	36.6443	25.9158	32.8543	37.1217	23.4267	29.0916	30.3722	20.55	24.563	23.5153	21.3401	21.1265	30.8733	34.0135	36.3495	35.0962	24.6097	23.6245	32.6405	22.5774	21.1178	27.4897	37.4213	34.5098	34.1466	28.5238	28.3097	25.5275	27.6448	30.6361	35.9762	30.1649	30.2767	31.9477	18.5776	29.3107	35.8874	30.5242	30.4182	28.7972	19.8033	34.8501	35.5463	22.1134	28.4657	21.4635	19.963
YES	ATRE1	2.90334	3.17792	1.56121	0.00854126	1.22224	1.69897	0.0107517	0.00484636	1.75503	1.64947	0.00327213	0.00573446	0.0052172	0.00740359	0.0077824	1.19812	0.0242392	1.53854	0.00539361	4.33598	3.47831	0.0126752	3.0642	2.76252	0.1133	1.37662	2.8376	0.00984443	1.57697	1.57602	1.47695	1.07204	1.38461	0.0104173	0.00300596	1.85898	0.00157006	0.00439626	2.47087	0.00817345	3.16972	0.00212192	0.0106401	0.00388335	0.00431652	0.00766737	1.79373	0.00207856
YES	ATREP1	219.841	211.093	154.536	166.404	251.19	116.636	126.057	167.534	109.715	113.792	113.086	109.907	106.37	170.853	210.776	206.722	206.621	152.125	117.565	157.198	117.239	118.011	158.432	195.571	195.355	181.84	179.444	171.734	158.324	156.888	168.289	209.564	159.48	168.851	168.084	105.58	163.052	211.559	178.15	150.842	163.423	116.853	218.452	235.6	109.722	205.931	118.281	107.047
YES	ATREP10A	63.8957	60.998	44.4895	54.9769	78.3932	39.4385	41.0797	48.2826	33.554	36.5565	40.0643	35.3986	34.859	55.3952	59.0133	59.3028	64.8208	46.488	38.8555	50.766	40.1838	37.7222	51.6692	64.1937	59.7822	59.0658	58.8798	52.8665	49.5965	45.2929	51.5864	64.4326	48.5065	48.8919	56.1326	34.3107	52.2927	69.1399	58.6266	49.1069	46.326	36.0523	68.5337	74.8231	38.748	61.8298	38.2489	34.2123
YES	ATREP10B	69.1697	65.7074	44.714	49.282	75.0182	37.1163	38.9647	51.779	33.6007	37.1293	36.6557	32.8001	34.4184	50.1518	67.0007	61.5231	67.4496	47.9445	33.1215	50.6855	34.7981	32.9434	45.7568	62.5323	62.9817	55.6249	55.1891	54.9904	48.5087	46.8513	50.7734	60.1708	48.8776	51.6419	53.0123	31.9254	46.529	61.7902	57.1198	47.8221	44.8534	35.8307	67.7571	74.7779	33.5573	63.6978	36.53	34.2171
YES	ATREP10C	32.6505	31.0647	22.2121	28.1954	40.784	18.4093	20.7095	25.0976	16.2748	20.0018	21.972	18.0109	14.7125	26.1082	29.1396	28.0388	32.0786	22.8896	19.4606	25.9736	18.0141	18.072	23.3242	31.5783	30.6837	28.7025	25.7064	25.2646	23.924	25.2378	24.4624	30.3026	23.3316	25.8598	28.1131	17.2512	28.9498	31.3725	28.9849	25.0723	24.0978	18.6589	30.0862	32.5033	18.7121	28.4708	22.2126	17.8521
YES	ATREP10D	33.7105	32.9174	16.938	16.4015	31.3946	11.6997	10.4103	18.787	9.78072	9.21478	11.6547	12.0586	10.642	18.0292	17.9507	22.7481	22.2196	13.7624	8.71887	14.8227	8.78177	10.7387	12.8148	18.9061	18.1733	15.727	18.5017	19.4879	15.6221	17.0145	16.1214	18.203	15.1888	16.1765	16.1885	7.64884	16.5258	22.1951	17.5917	14.8798	16.8185	9.4585	22.4808	26.6835	8.50859	20.4806	11.3795	10.4496
YES	ATREP11	346.098	326.938	248.623	276.422	423.544	191.49	213.466	253.516	189.19	189.747	206.825	184.617	182.749	282.109	332.688	331.08	343.699	246.621	194.511	259.441	195.06	190.396	254.351	328.776	306.525	283.558	283.895	290.541	259.204	268.476	274.755	342.332	257.179	271.589	281.427	184.573	278.868	352.333	301.449	255.098	254.555	199.374	362.287	375.324	187.647	316.276	203.246	172.616
YES	ATREP11A	33.7105	32.9174	20.6086	25.296	37.2067	18.9755	19.8374	25.44	15.8347	17.3193	17.0515	16.0539	16.8466	25.0557	32.1508	37.2979	30.3642	22.3306	19.0334	23.9698	17.445	18.2099	23.9587	30.7505	26.8255	25.0088	26.1698	25.5938	23.2966	24.5025	21.8732	32.4161	23.7082	23.608	25.652	16.2822	25.6944	33.7481	26.8301	23.8921	23.5878	18.356	32.9294	34.9626	15.1276	31.6204	16.1201	14.0316
NO	ATREP12	10.2726	10.3795	6.2083	7.781	7.47825	5.58706	5.68869	9.50401	4.10888	5.6934	4.97034	5.80628	3.91415	3.22517	9.36812	8.03053	6.26806	6.2826	5.75119	6.80309	4.67636	6.00351	5.1704	5.83926	4.42642	5.61022	8.55263	9.55372	7.02346	8.57524	10.8353	5.23666	10.787	10.38	6.59764	6.97937	3.6769	8.1448	7.09847	6.63037	10.4693	5.23715	8.22481	6.74741	4.48611	10.3284	6.42694	4.49034
YES	ATREP13	61.7515	58.0856	39.6412	39.5803	70.6122	27.5167	33.4723	37.0779	29.5127	29.1465	31.6396	28.3471	27.0179	40.0812	50.0924	57.6521	54.3129	36.2582	29.661	41.4904	28.8024	27.8038	40.2465	50.2169	43.5785	42.6569	44.4733	45.0487	42.3593	50.3453	41.5816	51.45	42.7543	46.4614	43.8483	28.1979	47.6996	50.5629	45.8234	39.8234	39.053	30.8314	51.9919	54.0948	29.0838	51.2596	29.7228	25.4738
NO	ATREP14	15.9659	15.0792	11.3238	11.7833	15.4484	8.99725	10.4655	11.2252	8.77915	8.57036	11.1089	7.48282	8.32358	11.3838	14.5808	13.5821	17.0233	11.8818	8.37907	12.1326	8.76018	8.43496	11.1846	15.3259	14.4742	12.3982	10.1136	12.4876	8.95044	13.0644	9.20659	13.6904	12.6899	13.1004	11.7447	8.60086	12.3022	16.5209	11.5936	11.7239	12.2144	7.70984	16.4638	15.7766	8.79282	14.9603	9.18673	7.80827
YES	ATREP15	183.932	173.564	130.044	145.661	215.094	106.137	119.201	142.904	99.6901	102.371	110.073	101.544	99.9651	153.937	173.806	175.557	194.236	128.472	108.086	142.167	106.443	101.199	134.006	170.441	164.705	150.305	151.051	150.126	135.749	140.183	145.755	181.303	133.89	144.111	143.647	101.26	140.937	192.463	160.265	133.548	140.071	106.916	188.256	203.089	99.851	164.495	113.78	98.7015
NO	ATREP16	7.39897	7.66668	5.01927	7.25461	8.69825	6.94768	8.38037	7.38591	8.57428	9.1176	7.53483	8.62758	4.6526	8.5971	8.67851	8.2183	7.47454	9.77839	8.86193	7.1845	7.10312	8.32128	6.84901	9.61241	8.2707	9.06754	8.55479	9.39177	6.22014	6.48507	9.64972	8.4911	7.05444	9.19132	9.86275	7.38524	6.99736	10.7273	9.13923	7.65017	7.95678	7.23258	7.25779	8.07411	6.70084	9.41694	8.49628	10.0223
YES	ATREP17	3.81208	3.82076	3.43803	3.47201	3.66017	4.22536	3.68333	4.52585	2.04519	4.4098	4.11936	4.11101	4.11626	4.83892	4.88152	4.46411	5.19805	4.60926	3.28369	4.40845	3.14693	2.57584	3.43253	4.82304	4.32724	2.7944	4.1731	3.53316	4.31018	4.02276	4.32017	3.84852	4.22921	3.38012	2.45759	4.53665	2.97426	4.0057	3.87528	3.25414	3.62585	2.83629	4.85469	5.33836	4.22148	4.04267	4.67049	4.48491
NO	ATREP18	148.248	153.692	145.128	123.817	140.505	112.394	137.234	119.412	148.07	103.777	164.723	119.174	94.2901	113.31	157.457	176.854	126.999	144.57	176.383	159.494	161.407	103.577	154.838	122.453	135.96	154.326	150.803	135.926	167.941	191.012	121.294	164.644	177.274	150.044	139.926	94.2878	113.603	178.409	101.149	143.443	128.913	167.367	189.626	190.329	157.805	161.34	149.079	135.647
YES	ATREP19	96.7957	91.7983	69.2251	78.4034	113.953	55.5943	61.4145	74.2882	57.0475	55.3185	61.0602	55.2707	53.0463	73.7029	90.0449	91.6338	95.9788	68.71	53.7088	76.4368	55.2839	54.8991	71.429	88.9484	87.6759	81.5706	79.3788	76.7952	74.63	73.459	77.5267	91.4279	73.0763	78.4371	75.625	54.1204	73.8814	99.6545	84.3205	71.0159	69.5769	56.947	101.145	115.906	55.3461	84.0789	58.4924	51.7934
YES	ATREP2	114.229	110.625	81.5791	83.4627	149.588	61.3193	66.5086	79.6901	62.3114	55.5867	63.9158	54.0465	50.6195	86.0003	118.099	114.108	115.027	74.9205	59.499	84.7075	59.9973	59.3686	85.1388	102.256	95.3079	89.2955	90.1594	98.0528	83.3419	83.7274	94.5164	100.903	86.4935	87.2498	86.6307	56.0194	79.0327	102.073	90.2925	77.6919	81.7644	54.0868	115.576	124.962	56.6785	107.642	63.3967	50.2666
NO	ATREP2A	53.7993	52.175	36.2029	46.477	70.7803	29.3877	34.3237	43.4261	26.7435	30.5598	31.7385	26.6258	27.6015	41.198	49.1301	47.9643	56.4771	38.6993	32.4511	39.516	32.0964	30.002	41.9014	49.754	49.1103	46.8604	43.5719	43.509	44.3566	41.4612	46.2855	50.7567	40.4987	46.4745	43.0919	27.2133	43.4881	55.9301	44.1791	38.6376	37.4917	29.756	50.514	59.6234	26.577	46.1339	31.5779	26.4192
YES	ATREP3	294.909	285.205	199.996	227.71	360.138	156.74	172.449	215.386	150.749	150.835	162.246	144.998	138.842	231.026	282.918	277.268	289.088	194.706	154.772	214.963	160.889	148.41	214.615	261.699	254.677	237.122	235.963	229.782	207.925	205.022	217.061	263.317	211.05	223.64	221.291	143.779	219.213	283.058	237.557	204.443	223.354	152.632	304.586	341.536	148.292	257.179	160.628	142.853
YES	ATREP4	83.3995	79.2207	61.1908	67.0168	107.582	48.5923	56.2285	68.1507	46.0091	51.3705	54.1154	49.2166	45.7506	72.7968	81.8813	83.079	88.4564	63.2082	51.2184	66.2114	52.4047	46.2108	66.5137	83.1503	80.6114	74.0837	67.5168	71.0974	61.5997	65.0852	69.8755	89.046	64.3488	69.554	71.6029	44.7678	66.4745	91.5432	76.0193	60.9827	63.896	47.6089	90.1343	98.0747	50.9136	78.9117	49.7707	47.1005
YES	ATREP5	52.712	51.164	30.894	40.3651	66.1675	27.5802	29.5679	32.2326	25.7082	24.9794	25.3461	23.0513	23.8169	35.6699	46.2264	42.4415	42.1215	31.428	25.7764	33.3522	24.57	24.2429	32.7143	43.6352	46.2154	43.8281	40.6299	34.2148	33.0067	34.6408	35.8103	45.8734	33.7377	36.895	37.651	24.8082	36.9986	46.6125	38.2729	35.1618	30.8932	26.5289	41.7396	47.7664	26.0187	41.1721	25.0166	26.0561
YES	ATREP6	56.9866	55.2958	40.3375	45.7289	64.7832	29.4829	34.4237	43.1235	30.1197	32.3353	33.3971	30.0144	31.0913	46.3136	53.7033	52.9096	56.6169	38.6505	34.6589	41.1764	32.7675	29.2288	40.5217	52.0105	48.986	48.0732	45.8711	45.4405	42.1574	37.3435	45.7056	52.3855	40.0545	46.339	44.9432	29.9816	38.7199	54.3059	47.9597	40.6479	42.0268	32.9987	60.1892	53.0605	33.1345	47.7089	33.9554	29.0313
YES	ATREP7	58.41	54.2612	40.9642	46.7616	64.8649	32.8658	34.454	43.8097	31.6693	32.4112	39.2221	31.3246	37.7482	45.7896	50.6726	55.6873	50.1297	40.9349	34.752	42.443	36.3298	33.9118	44.1677	57.2097	49.6007	46.3793	47.478	46.2757	39.8085	41.8561	45.663	47.5727	43.7949	46.9769	44.7591	32.895	42.9804	55.7805	48.5268	42.2391	44.8715	32.9094	59.811	62.7788	37.1796	48.2897	36.2811	35.546
NO	ATREP8	37.5893	36.2845	26.2061	28.2847	39.151	21.822	24.6337	30.3354	23.5493	25.237	23.4223	21.0077	19.3382	27.648	34.7437	35.3313	35.0811	26.7299	25.2475	24.8876	21.1563	23.5246	24.2732	34.1323	33.3343	29.4167	31.6793	30.3985	26.9821	28.1337	30.6875	34.2369	27.0449	26.6386	29.6799	21.5252	29.5585	36.0531	29.1396	26.1933	26.5069	24.6653	37.9246	38.6167	25.6403	29.2971	23.361	25.1362
YES	ATREP9	89.0047	85.686	70.923	77.0116	106.791	53.6045	59.2928	73.8645	51.4019	54.994	59.591	52.5534	48.4375	75.9363	94.7115	91.1595	94.1212	65.9296	54.2966	72.7599	55.6448	53.8358	71.7579	87.9123	79.502	84.2418	80.3564	74.1085	69.1425	68.517	74.245	88.95	68.8853	75.4855	78.4365	47.2332	73.9126	99.9836	82.1322	65.7035	71.6289	55.2359	96.9133	105.066	54.447	85.8535	58.0289	52.2785
NO	ATSINE2A	3.75048	4.61373	3.12056	4.41898	3.32775	3.02555	6.30109	4.12737	4.75278	2.97435	4.64583	3.31534	4.80289	6.27869	3.94718	4.66063	4.08606	4.18824	4.68173	3.0699	3.31536	6.32133	3.2141	2.98729	3.04927	4.16529	5.43696	4.22232	3.42944	4.72515	4.23074	5.99709	3.30489	7.39438	4.66152	6.42704	2.79622	4.21986	4.12548	4.97168	1.46984	3.34123	3.11604	1.07705	4.70219	5.52496	3.53151	3.79056
NO	ATSINE4	38.9292	42.5818	29.5073	35.2338	36.7496	29.307	29.8789	30.7279	30.7004	31.6152	27.8582	27.8336	26.5424	30.706	31.1987	34.3081	35.9009	32.7184	30.3221	33.2953	32.1243	32.2773	32.6333	34.0596	32.2292	36.4361	39.887	33.5729	33.5925	39.01	33.2918	35.5759	31.4995	35.9461	35.907	31.6793	28.5835	31.9324	32.0191	34.8665	30.6461	33.2771	25.0652	31.9936	28.6002	36.694	32.4681	32.42
YES	ATTIR16T3A	51.6906	50.2229	31.2677	39.6067	61.3086	25.6988	31.0662	39.043	26.3809	24.4331	30.763	23.1221	28.3208	41.6314	49.9042	46.8101	47.0271	32.2411	29.3565	37.5883	28.8978	28.1089	36.6406	47.2696	43.9734	42.0319	46.1852	37.4767	41.5993	36.4473	38.8729	51.7807	32.9585	44.0612	43.224	25.8519	38.2531	57.0005	44.1438	36.1881	37.8755	27.3092	53.5271	59.3722	26.445	43.0306	29.4629	27.137
NO	ATTIRTA1	32.105	35.4171	19.4488	24.0666	34.5712	16.6923	17.3592	20.027	16.8082	16.6451	16.3862	14.477	13.8801	23.0099	29.4432	27.913	29.0797	22.0229	16.9303	22.7331	16.7784	15.6195	22.902	29.2755	27.4715	23.9567	24.4654	22.9981	24.0173	20.8328	21.127	35.3737	24.0467	20.5343	20.4247	14.6014	22.9142	35.6406	25.8693	21.013	21.1169	16.1712	31.8969	34.2049	13.5403	24.6629	17.2677	12.7993
NO	ATTIRX1A	23.7546	25.5112	17.7526	17.5488	25.7125	13.2478	14.6944	17.7163	14.4375	11.8033	15.6227	13.5085	10.8278	18.3905	20.756	21.3337	25.273	16.5479	12.3602	21.9229	14.4604	13.0069	18.0012	20.762	20.9096	20.62	18.9357	17.1816	18.1722	18.9635	16.4686	27.6544	15.5692	17.4282	19.1902	12.5535	16.7037	27.9226	20.9296	18.2839	19.8838	13.5508	26.721	29.6878	13.0089	21.6556	13.6576	12.8596
NO	ATTIRX1B	20.1035	22.8571	14.3807	14.822	22.2439	11.0915	12.5723	15.1219	11.6247	12.0264	12.7205	11.5704	9.58117	14.283	17.5636	18.2687	17.602	16.3713	11.6308	15.834	10.2864	10.3002	12.7617	18.4269	18.1861	16.1485	16.2541	14.4708	14.8263	15.0104	15.7277	22.7717	14.5169	16.3899	15.2435	11.1852	15.1487	25.2197	16.8938	13.4818	14.1918	10.8353	19.4427	27.8936	11.2863	18.7541	12.899	9.73252
NO	ATTIRX1C	15.4597	15.48	9.84711	12.9317	18.4896	11.7168	11.6624	8.83274	9.79541	10.0551	10.1239	6.59631	12.5354	10.1526	13.8446	11.9027	16.3091	11.4586	5.28445	9.00768	9.03682	7.22235	11.3766	13.7715	7.70379	11.0134	9.32137	13.8495	10.4506	10.829	10.5644	21.018	12.7144	15.9172	12.9193	6.61949	10.9205	13.7138	11.5866	11.4796	11.6045	9.65696	20.9097	19.1903	8.64711	6.60808	6.75994	6.32507
NO	ATTIRX1D	12.7504	13.55	11.0524	12.2174	20.1946	8.51802	8.91631	9.57184	7.27405	8.38222	7.01076	6.91094	6.14662	11.8007	13.7445	15.967	13.04	10.0169	7.83371	10.6283	7.09654	8.88278	8.95755	11.2719	13.1477	12.1275	11.6073	12.5832	9.93221	10.5316	11.9835	17.1467	11.3708	10.9281	10.3984	7.35758	9.67189	15.0738	11.6271	10.2197	7.95962	6.67167	14.992	17.5843	6.38505	14.432	8.48546	6.99196
YES	BOMZH1	18.7138	18.1125	17.2248	15.1597	19.9182	15.6009	17.3035	17.2606	16.5549	18.3875	14.2495	15.0226	14.28	20.0529	16.0686	22.4348	18.7094	16.4322	13.2326	15.0196	15.374	16.0602	14.3612	18.9959	16.457	19.053	18.0432	18.2261	15.9573	13.8417	16.0293	18.3714	18.7007	20.3451	17.1364	17.9793	16.0744	18.5285	16.7086	16.8937	16.8498	14.6926	18.0042	17.4732	17.4382	20.8783	14.1815	18.9397
YES	BOMZH2	7.388	7.28308	7.93059	7.48483	8.4844	7.95235	7.29228	7.97933	7.44309	7.73088	7.7917	6.55253	7.14109	7.22491	8.85324	8.08326	8.3636	7.31321	8.06955	7.53159	7.77465	6.30039	7.83106	8.93519	7.61255	8.16732	6.64624	7.73618	7.28469	7.48072	7.38371	7.79276	6.68917	6.64395	8.95508	6.72398	8.05889	8.45422	7.59075	6.99789	8.50236	7.40854	7.80116	6.09272	7.12613	8.58275	7.16842	7.87021
YES	BRODYAGA1	33.8615	32.6441	22.6236	24.7583	35.0689	20.5434	23.0477	24.9668	17.5914	19.2018	19.9424	20.4225	14.7855	29.0565	30.2206	27.5644	32.0937	21.7022	18.825	24.1462	16.9004	19.7824	20.368	29.4264	28.6805	23.7118	26.1255	27.2225	24.3961	24.286	23.0937	28.979	23.4629	24.3473	27.1332	17.2369	25.3816	29.5937	27.4481	23.7347	20.9337	19.4812	31.7935	30.7383	19.4411	28.4709	20.7496	17.9821
YES	BRODYAGA1A	40.7895	40.198	26.7454	31.3494	42.1282	23.9628	28.1697	26.3253	23.7808	24.915	23.9901	23.7148	20.0952	31.741	36.3379	32.2051	38.5259	27.2181	26.0462	28.3806	25.9191	21.6225	29.4267	33.0071	33.7417	33.277	33.5612	29.3772	29.469	30.2809	28.5914	42.2638	28.1259	27.9363	33.8793	19.2515	27.0057	32.2315	31.7157	30.0078	26.915	23.7967	36.2017	42.7878	24.9452	37.7903	23.2707	19.482
YES	BRODYAGA2	133.561	126.191	85.0436	96.4483	141.427	70.0328	76.907	96.8995	66.3601	71.9371	78.5194	70.1807	69.4586	96.1229	117.49	120.017	120.141	88.6026	69.4587	91.4069	71.6694	70.5232	90.5	116.796	108.011	104.07	99.2657	99.9393	93.2658	89.6717	97.4027	118.994	95.4231	97.7344	97.9139	67.5346	91.3745	127.051	105.48	87.5815	91.9007	66.8321	121.64	132.665	66.9411	118.07	75.5838	67.681
NO	DRL1	1.38424	1.17355	1.48075	1.71668	1.06745	1.78909	1.86881	1.47417	1.84983	1.90092	1.60233	1.5595	1.897	1.86167	1.46746	1.65115	1.46481	1.53471	1.87669	1.94298	1.71606	1.79148	1.60414	1.62001	1.67246	1.71133	1.4986	1.76744	1.76814	1.53805	1.62002	1.50282	1.3495	1.47375	1.96595	2.23074	1.55903	1.69573	1.61675	1.75785	1.8727	1.84813	1.53408	1.62368	1.79709	1.43943	2.11081	2.07048
NO	DT1	56.0535	62.2493	33.7491	38.34	64.5589	26.9568	30.2858	37.8852	24.447	25.7419	27.2465	23.1492	26.8585	41.8702	54.9943	51.2328	50.9637	33.9783	27.9001	38.2363	27.2122	23.4293	40.0547	44.4856	47.6021	40.7901	43.1708	42.2686	37.8813	40.6805	41.9222	51.1262	35.784	40.5259	42.5469	24.1958	36.9535	62.0496	44.5515	37.6744	34.7596	26.691	53.2628	71.974	25.3773	48.4513	28.9962	25.3189
YES	ENDOVIR1	2.07976	2.14359	2.80191	3.62598	3.59942	2.81179	4.43483	1.74088	6.97578	4.78868	4.24305	8.56022	1.44177	4.41214	5.35804	3.16622	3.16062	4.38159	1.39396	2.34663	3.24331	2.84819	2.85861	5.44834	2.27038	3.06384	4.52652	3.7713	2.84861	3.21917	5.07697	7.89226	3.1577	4.39597	5.33306	3.16272	1.2633	3.61298	5.47967	2.67627	2.95165	3.63568	4.59661	2.34943	2.21643	2.42797	3.97892	1.56602
YES	HARBINGER	3.42716	3.27069	4.95192	1.39477	0.888876	3.82457	0.0402582	2.32846	3.51252	0.016854	4.26978	1.5039	3.14211	2.35716	2.59845	4.78911	1.88069	2.16442	3.48408	1.35652	4.07584	5.59434	3.5511	1.42077	2.34956	0.11938	2.86034	3.1355	0.899267	1.97482	2.75606	2.49887	3.55271	1.66928	2.25043	5.7516	1.05391	3.23926	1.9675	1.22544	2.8173	2.19105	1.66123	4.77887	2.74598	3.09959	1.35956	1.97701
YES	HELITRON1	4.58065	4.19397	6.2863	5.9537	6.1935	5.6801	7.5855	5.0802	5.47988	7.02156	5.68644	8.96616	5.7847	7.50044	6.17239	6.44938	7.07397	7.27524	7.44133	4.1681	4.74394	8.12004	4.47256	5.74794	8.17245	6.72955	3.35384	5.78974	4.61013	5.46476	6.31908	5.10303	5.25675	7.40496	8.75407	7.37059	4.84212	5.68723	7.69799	5.86679	6.30326	7.43062	7.83527	5.20227	5.82126	5.42312	6.14237	9.11312
NO	HELITRON2	9.45642	9.15955	10.423	8.30211	4.99975	8.2135	8.20575	7.80709	5.13631	5.4523	13.1602	9.50641	10.0269	10.1473	6.99041	8.11986	10.5325	5.31624	6.0844	11.2057	8.42918	11.312	8.26485	7.80057	10.0662	8.81351	10.4511	8.82072	10.1519	4.77703	6.83758	11.3035	7.50694	7.40579	7.84288	8.88516	6.83593	9.50666	8.06516	9.18681	9.39426	5.97495	12.1622	10.7657	11.2537	8.91542	7.84889	10.0086
YES	HELITRON3	2.38255	2.19347	0.840607	1.28359	2.71246	2.08121	2.0043	1.19391	1.5217	2.49061	2.53046	1.96596	1.69526	3.5147	2.06228	2.82013	2.17149	0.0298195	0.0290117	2.98178	2.2349	1.89044	2.08999	2.79701	2.46259	1.44403	2.56356	2.59421	2.36771	2.07643	1.25085	1.90164	2.01956	2.50424	2.70507	1.44818	1.89453	1.71518	2.07992	1.946	1.54132	3.49897	2.81735	3.96002	2.59863	1.79381	1.41732	1.31939
YES	HELITRON4	7.64214	7.26888	5.81488	6.14556	5.58515	4.64093	6.97935	5.74596	5.24768	5.91175	6.8017	4.54582	6.79323	6.48131	5.78976	5.32137	4.3954	6.32605	6.20143	4.8942	6.12454	6.85799	5.97323	5.69082	5.88858	5.7178	6.32964	5.5574	5.10581	6.38922	4.78891	4.82247	4.90691	5.65689	5.58715	5.56672	5.91304	4.50764	6.1622	5.94013	4.89909	5.56022	4.78199	6.40273	5.55754	5.89402	5.54661	5.72295
NO	HELITRON5	3.01536	2.86075	4.05878	6.73089	5.60598	4.92078	3.5516	2.77549	3.97614	3.9936	7.7877	4.62944	2.60116	6.69288	3.5588	4.80066	4.91131	2.26646	3.94704	4.38972	6.49192	6.23607	6.2437	2.33052	4.60001	3.66779	3.55957	4.78626	4.93607	4.90515	2.48611	5.10488	2.29354	3.19499	3.12102	3.34846	3.41035	4.49903	4.18103	8.07008	4.35585	3.71731	3.77893	3.71863	5.67684	3.71763	6.06761	3.22274
YES	HELITRONY1A	53.0693	49.8663	36.9428	40.6246	59.8829	30.2232	31.8193	41.5395	29.4357	28.261	33.42	29.0561	26.8274	40.4186	52.7475	51.3377	48.6816	34.5791	33.8643	40.3813	28.0866	29.3425	36.4847	49.4161	47.4256	46.3072	45.5261	41.9851	38.2464	39.8308	40.8306	45.8968	38.419	42.3816	41.0931	28.3241	40.879	54.3031	46.2018	35.4098	38.6191	29.4927	55.5044	53.8295	29.2437	47.7654	32.6011	29.2023
YES	HELITRONY1B	111.905	105.555	72.6786	83.1484	127.363	62.8462	60.2283	83.2653	58.3337	59.0369	63.8269	56.483	56.9307	85.1017	103.861	101.923	107.791	76.1194	61.4576	82.454	60.2327	60.033	76.6865	101.434	99.123	93.9922	90.3875	88.9288	78.9322	85.0935	83.3562	105.737	78.5413	88.5554	90.5391	56.6456	85.0675	110.276	91.5946	76.3006	78.9623	58.2938	112.568	115.435	59.2702	94.0221	64.6493	56.6681
NO	HELITRONY1C	5.74838	5.43351	3.92139	4.78661	5.00288	2.31037	2.88309	4.51432	4.56499	3.64943	3.08997	2.76525	2.86504	4.81652	3.1891	3.95135	4.17462	4.11322	3.02416	3.55023	2.72237	4.37607	3.28686	4.53422	3.66571	4.5882	4.49847	3.55056	4.21996	4.24673	5.44234	3.60593	3.31469	3.56494	5.04923	2.99195	3.82394	3.463	5.05071	3.41624	3.53028	3.72853	6.45504	4.91917	2.93374	4.14243	2.34829	3.59137
YES	HELITRONY1D	21.9317	20.448	14.3215	15.7303	25.3047	13.4477	11.531	14.9611	9.86441	12.2321	13.2422	12.9171	10.593	17.2895	22.3507	21.0352	21.0025	16.4238	10.7843	16.7378	10.8849	10.4247	14.3695	21.8397	18.5183	14.7665	16.3893	17.5889	14.8385	14.8056	16.3782	22.1832	17.2656	13.9439	16.4351	11.5617	17.2947	20.3486	19.0371	14.3701	14.3751	12.3815	22.6514	21.306	10.4351	22.2363	13.1889	11.1809
YES	HELITRONY1E	131.065	124.371	96.5151	104.664	167.799	77.4997	79.9582	105.864	74.2771	71.4152	76.3981	70.9253	68.5981	99.4164	126.33	126.17	125.931	94.1919	76.1354	103.285	73.3531	73.3839	92.9067	128.328	122.88	112.929	106.797	109.353	101.243	99.3244	103.687	126.361	96.8086	97.5572	102.412	70.3126	103.384	128.734	114.025	95.6608	101.993	77.324	132.286	146.143	74.1989	121.435	76.8698	70.6603
YES	HELITRONY2	6.15708	6.01703	5.99129	7.11401	6.3346	6.64191	5.9773	6.01606	5.56187	5.88176	5.79309	5.81627	6.51501	4.48089	7.97805	7.45216	5.08831	5.45545	3.70944	5.17594	5.45989	5.00412	6.00778	5.39233	5.72497	6.14659	6.66092	6.83967	5.62731	6.28614	6.13542	6.79117	6.72771	4.1438	4.40059	7.12833	6.24498	5.64297	5.07773	5.88883	7.16258	4.59429	8.30093	6.75639	5.5064	8.81769	6.16576	7.70758
YES	HELITRONY3	19.7378	19.2638	17.2101	16.2331	21.582	11.1925	12.839	16.6784	10.6528	11.9338	12.0813	12.3511	11.3585	16.0079	19.2181	19.8522	20.9606	12.0457	11.0944	15.063	12.341	11.2863	15.6098	17.2175	18.1596	16.576	17.5265	19.9534	15.7375	13.8774	15.7983	17.79	16.2099	16.1031	14.29	10.7142	14.939	21.6168	17.153	17.2768	15.0541	12.8503	24.6398	23.1784	11.7057	16.8326	12.8803	11.0653
NO	HELITRONY3A	1.09959	1.07331	1.03843	1.14077	1.42766	0.331807	1.01682	1.05422	0.310522	0.913276	0.922434	0.900741	0.793215	1.16988	1.30441	1.30622	0.611951	0.967284	1.00712	0.478073	0.914323	0.344415	1.08385	1.26785	0.551313	1.13584	1.16708	0.990681	1.09295	0.981436	1.2058	0.455199	0.557121	0.426556	1.1333	0.7498	1.00634	0.577843	1.22415	0.987423	1.06802	0.84419	1.44425	1.43527	0.944375	0.542242	0.871268	0.874755
NO	LIMPET1	7.53793	6.90926	7.19397	5.80496	5.54568	4.93456	3.40652	7.0576	5.47535	6.38284	5.29561	8.07486	6.92775	7.06474	3.64227	9.26301	7.14979	5.08815	3.69952	4.68529	4.78863	5.73665	4.49416	7.2182	5.86682	3.80391	5.143	9.30673	5.21835	4.5097	5.09506	6.25633	8.37816	2.99618	8.57011	6.09911	4.87688	2.2485	6.55125	4.26266	6.29447	6.24249	4.01633	5.06942	5.79936	3.97296	4.22794	7.04873
YES	META1	26.4724	27.0419	23.0896	26.2004	32.7279	18.0127	27.3236	22.727	21.7663	22.8304	20.5867	21.2984	27.368	19.6188	27.8096	25.6064	28.0551	20.4666	21.3292	20.7573	15.9591	26.6414	16.1218	26.8639	30.3905	23.3198	23.0413	30.5557	25.9115	21.2218	17.6702	25.3721	17.7504	23.7394	18.0238	20.3851	21.775	24.111	24.8123	23.9818	24.9084	26.2511	25.268	26.9971	27.9548	22.9833	24.9253	30.0633
NO	RathE1_cons	2.50347	3.22576	1.30895	1.55966	2.23539	1.62164	1.21819	0.839456	2.13234	1.46902	1.6845	1.39334	0.858338	1.05263	1.87665	1.69323	1.4968	0.720851	1.17795	1.02604	1.56619	0.922886	1.47725	1.64673	1.1417	1.41289	1.75804	1.1079	1.85882	1.07721	1.37279	1.38815	1.32729	1.72384	1.06964	1.78175	1.40285	1.55536	1.30507	1.23591	1.43192	1.05669	1.26237	2.07224	0.687366	1.00118	1.10274	0.996341
NO	RathE2_cons	14.8575	17.838	14.4203	16.9679	15.2784	10.9578	14.4895	13.7428	14.0764	13.3263	13.4224	10.3682	14.046	10.622	13.4352	13.0737	14.9777	13.2596	12.7544	14.129	15.3858	12.878	14.2458	17.0685	15.8454	16.2538	14.0818	13.3774	13.0027	12.277	15.2422	13.8664	13.0563	18.0356	15.1716	11.7693	16.7185	14.7854	14.2426	16.0115	12.9306	13.2203	15.4226	11.5029	11.6204	16.3683	10.1652	11.3688
NO	RathE3_cons	5.42103	6.37929	5.30942	4.5813	4.93797	4.52414	4.16399	4.2587	4.24012	3.69954	4.89829	3.8857	2.33458	5.17904	4.1625	4.07149	4.83893	4.93392	3.24821	4.43148	4.69106	3.10965	4.92343	5.23128	4.59354	5.12854	5.68072	4.64431	4.03726	4.13315	5.85063	3.16861	5.41467	3.56826	4.75209	4.46351	4.17356	6.1987	4.54116	3.89485	4.13523	4.8214	4.73779	3.21771	4.12972	6.60398	4.37002	3.50853
YES	ROMANIAT5	6.06265	6.23378	7.10459	7.98394	7.88557	7.0423	8.50064	7.89989	8.04203	9.44014	7.2611	8.88221	10.4826	7.21528	9.31728	8.7499	9.1682	7.54456	7.57869	5.63178	10.025	7.21348	9.58776	8.28205	7.9974	8.30258	8.30905	8.89374	6.40191	9.73656	7.71347	7.3024	7.25176	9.03211	9.68157	8.59849	10.4385	7.14598	8.80342	8.0839	8.40418	9.37791	9.63252	8.73362	5.8698	8.40596	10.3551	8.5832
NO	RP1_AT	22.8838	27.3768	10.7116	12.3255	21.4821	9.30093	9.73444	14.1976	9.73312	9.12667	8.54804	7.83073	7.50866	11.3382	14.8627	15.0859	16.4279	10.965	8.13941	12.8255	9.02992	8.50277	12.2825	15.8949	15.7891	11.3044	11.9771	15.0118	12.1481	15.4122	13.4124	17.9494	9.41874	10.5619	14.6072	10.079	16.398	19.8138	13.0441	11.2882	10.6502	9.24708	16.0098	21.4452	8.38366	13.6424	8.05434	7.66204
NO	SADHU	4.23474	4.81607	5.95864	6.10036	5.47049	5.03066	6.82682	3.2791	6.62135	6.46641	7.41238	8.09307	7.76583	6.09824	3.55342	6.6655	3.97152	3.73041	4.77639	6.68528	6.87892	7.72108	6.64269	6.20541	4.85942	6.41435	5.22062	3.71837	6.42869	6.57228	6.66641	4.84879	6.38761	6.07218	7.5342	5.90207	7.09205	6.08469	6.76558	6.94646	8.12178	7.22625	4.84371	5.53373	7.41888	5.76365	7.252	3.32889
YES	SIMPLEGUY1	49.8532	48.0433	50.6164	48.9925	58.0117	39.5689	40.339	42.9653	36.6822	36.8054	40.0064	39.5632	33.0656	49.0554	51.8657	54.2749	55.6207	46.7243	47.791	44.2155	42.1061	39.4026	46.3001	57.5806	57.456	53.4124	50.4571	49.0019	42.9545	43.6949	52.1371	44.8645	60.373	50.0343	50.8532	36.498	37.4672	53.3615	43.1321	45.4677	41.6717	37.5322	49.4268	50.573	38.482	50.1815	40.7064	36.7899
YES	SIMPLEHAT1	15.5693	15.5018	14.5414	13.6235	15.1973	12.8724	15.4704	13.3734	14.8983	13.4342	13.9824	14.7342	10.8914	11.4245	15.6407	16.213	12.0336	14.106	13.0549	15.5398	12.5757	12.1395	12.9986	17.9767	16.7396	18.6859	15.6296	15.1676	15.6446	14.0013	14.1433	16.0915	17.8629	15.5639	17.3193	10.3553	13.3448	19.2596	14.1517	15.8095	15.2933	13.1299	15.799	20.4087	14.1374	16.8943	14.1224	12.4932
YES	SIMPLEHAT2	15.8396	16.6269	16.5023	15.3917	20.808	13.5153	15.4351	12.5239	13.9689	11.6201	15.2558	13.5155	15.3689	16.6375	17.0512	15.8443	16.4873	14.5548	12.0353	18.3153	15.246	13.9633	16.0518	23.9954	17.1927	18.3768	17.9719	14.6869	15.8193	15.3041	18.7167	16.4841	15.1645	19.4195	21.3557	12.2235	15.7826	16.9868	16.3519	14.7674	15.7432	11.5113	18.4832	24.1174	13.79	19.9939	16.1494	10.6912
YES	TA1_AT	1.02407	0.872907	2.00717	3.07666	2.18532	1.45069	3.05308	2.95383	3.1128	2.44807	3.69116	3.14423	3.00327	3.53046	3.52523	2.18349	2.31721	2.26448	2.47972	3.352	3.67606	2.85696	3.04601	2.40222	3.35918	2.72638	2.52669	1.59873	2.26636	2.481	2.46785	1.39649	1.62375	3.84526	2.41332	2.46659	2.57395	1.92052	3.39666	2.70622	4.27038	2.64375	1.78303	3.27803	4.19308	2.49991	3.6527	3.04249
NO	TA11	30.8552	30.1561	25.6365	25.9321	25.9752	25.6374	23.8487	24.3065	27.332	33.6858	24.7205	24.6475	26.6963	21.3346	22.1093	22.9924	29.4485	29.7624	23.6074	23.6879	30.5893	26.8154	28.2403	20.5636	29.8302	29.1393	27.0065	25.5389	25.8667	26.9499	25.1183	26.9183	25.3476	24.3321	23.696	25.2184	23.6057	21.5377	24.9376	23.4447	20.5929	34.2187	21.0002	23.0144	27.6975	30.2704	26.8097	27.7666
YES	TA12	2.1438	2.2147	2.65062	3.47872	2.59664	3.24328	3.08977	1.25772	2.8202	3.17672	3.67029	2.28347	2.75053	3.15498	2.77029	2.98251	2.5316	3.17513	3.31903	2.3585	2.32305	3.33868	2.3337	3.01502	2.88671	2.53265	1.41728	3.21965	2.29405	3.04154	2.58293	2.72802	3.08775	3.62632	3.52602	3.44566	2.54183	3.20177	2.7536	3.70774	2.01793	3.46953	3.08985	2.1056	2.57831	3.0602	3.51034	2.92628
YES	TA1-2	0.994988	1.05299	5.41974	2.84272	3.95516	2.89888	0.00253367	2.96116	1.62389	1.54857	3.96035	4.1777	1.91601	1.58739	4.62058	1.33839	1.31516	2.82724	1.72358	1.35195	1.75473	1.82	1.63759	1.49554	2.90842	5.22874	6.04223	1.26212	1.24165	2.89236	1.44056	1.30318	2.78485	2.54196	2.62836	1.77662	3.98468	1.38323	2.07107	3.12739	3.14625	3.20779	3.76019	1.36126	1.73917	3.41691	4.09136	0.0874455
YES	TAG1	8.2437	8.37433	8.86377	8.0089	10.0631	9.01656	8.27649	9.20476	8.39156	7.96226	8.66262	8.84476	8.75409	9.28139	9.87029	10.137	9.87585	8.98759	8.53481	8.84972	8.30528	9.02494	8.12784	9.50406	9.57293	9.95219	9.81754	9.74769	8.89059	8.40397	9.20339	10.8203	9.0511	10.4324	10.3028	8.16901	9.1164	11.2168	9.27765	7.95047	9.03764	8.60665	11.5209	11.431	8.38697	9.72576	9.54087	9.38142
YES	TAG2	9.53927	9.61569	7.6067	3.61479	4.6121	6.76536	4.42726	4.86784	6.12482	8.24632	4.26825	3.27699	5.15279	5.25596	4.98476	6.08026	2.1304	4.58665	4.67507	5.29615	7.50526	6.09056	6.45339	4.16682	5.80962	4.95016	5.58062	2.28693	9.63667	3.83904	7.97086	6.33821	7.59068	8.08674	5.4443	3.95865	5.8748	5.99889	5.70332	3.59889	7.0639	4.30293	5.35253	4.14275	4.99086	4.76598	8.40267	3.97552
NO	TAG3N1	31.2242	30.6632	19.8674	22.4845	29.8055	16.8435	17.3018	19.226	14.9057	14.7294	14.9541	14.9772	12.4059	23.798	26.0501	28.1325	26.9719	19.9794	16.0143	15.1098	17.7443	15.8569	23.1485	25.452	25.4341	27.6424	24.4277	21.7235	17.2995	17.3666	19.3576	25.0111	22.315	21.5724	21.8189	15.0228	20.7774	22.1285	21.8888	18.5598	21.6317	13.7388	24.2393	22.3238	12.6619	25.357	15.4901	16.7406
NO	TAT1_ATH	1.61569	1.7393	2.10184	2.15023	1.82941	2.39615	2.30634	1.60782	3.3184	2.14706	2.35954	2.27272	2.52391	2.48099	2.15278	2.005	2.15234	2.3346	1.46095	2.22743	2.48633	2.40423	2.45069	2.20503	2.30772	2.36106	2.20274	2.27415	2.36784	2.13431	2.14012	2.04834	2.34233	2.46952	2.25606	2.41494	2.38256	2.02096	2.15462	2.17839	2.35926	1.39015	1.12845	2.08684	2.47649	2.04037	2.19344	1.76424
NO	TNAT1A	64.7964	63.0036	47.5108	56.6487	80.7958	37.5072	42.4471	51.2347	33.9918	38.2337	39.8855	36.2048	31.2354	50.1265	60.7625	62.7019	62.4878	56.0488	39.4131	47.3719	38.7082	39.0526	49.4875	61.4889	58.8293	59.5459	53.5882	55.7696	48.9648	48.8133	51.5776	71.1557	52.2531	48.2756	62.9261	33.1847	52.2361	73.8151	58.3399	46.162	48.0072	39.0641	66.8003	71.7419	39.6526	62.8763	40.6125	34.7762
NO	TNAT2A	20.1866	18.9275	15.6014	18.0017	22.7264	16.2131	16.8521	17.2443	13.4812	17.1111	14.1894	14.5215	12.0732	14.4494	21.1319	23.7137	22.1576	14.4823	17.3758	13.8138	13.0662	14.6396	13.505	19.8179	18.6552	22.499	18.418	17.1069	17.7309	14.2334	17.4115	19.2987	20.3955	15.8974	18.229	14.7375	15.9604	16.3571	17.1074	15.7445	13.1382	12.5447	18.9442	16.1332	17.3635	18.5459	17.0032	16.7861
YES	TSCL	9.08362	9.40832	14.1519	11.7238	8.91402	16.5826	9.43055	9.91428	11.9042	12.2777	13.8368	13.9259	12.5894	14.2539	8.79295	10.9896	13.143	13.063	12.5546	10.9398	11.0093	14.217	10.8988	11.295	10.7551	11.6899	10.7561	11.7664	11.8743	14.5689	12.7142	10.4303	12.678	10.2313	11.1836	13.5708	12.801	12.8758	12.5775	12.1079	13.2349	11.2054	8.54442	8.69711	15.5879	12.3417	13.8434	13.4214
NO	Unassigned	21.4293	23.4898	21.7981	18.5295	17.4645	23.7535	23.6812	22.6979	22.8251	20.9655	25.3354	25.7716	26.5623	22.626	23.4133	18.936	20.9658	20.3614	24.2765	23.4973	23.2666	30.5399	22.0232	27.909	17.7435	20.1634	21.9079	20.4397	23.3438	21.3713	25.0898	20.0803	24.5772	26.5642	23.3243	23.9923	20.3917	22.9266	21.0981	19.1303	22.4865	23.0806	20.4382	20.1462	24.7374	23.2683	21.5509	23.5019
YES	VANDAL1	12.1996	13.0499	11.0523	13.7238	14.0616	12.7999	10.9973	10.4171	12.5406	12.1872	13.4893	13.3931	9.73515	11.0886	14.0853	15.8411	14.591	11.0102	10.2463	14.4107	11.3944	8.91533	12.1516	11.6201	11.8073	18.1097	16.2325	13.7904	10.9551	13.5846	16.3429	12.1116	14.629	14.9241	9.6517	14.5602	9.93061	13.5439	11.2017	12.6849	13.5109	8.07103	8.93918	14.9322	13.0973	15.8559	13.2634	8.96591
YES	VANDAL10	0.953579	0.95244	1.14793	0.000168929	0.0012211	0.000278593	0	0.00123116	0.000719223	0	0.000437159	0.000233016	0.0024647	0.00166932	0	0.000620531	0.00485114	1.10621	0	2.20917	0.000931578	0.0009443	0.000619772	0.00197148	0.0176746	0	0.000357453	0.0038925	0.000852781	0.000266748	1.69985	0	0.000539276	0.000202409	1.2091	0.00210432	0	0.933947	0.732809	0.000451106	0.00142652	1.29917	0.00456725	0.661328	0	1.07931	0	0.000991231
YES	VANDAL11	0.916466	0.915455	1.29809	1.14802	1.06063	1.30613	1.18322	1.26646	1.24912	1.30951	1.26175	1.28963	1.44934	1.25074	1.20612	1.21833	1.03541	1.29941	1.20838	1.1678	1.21895	1.29585	1.16032	1.18298	1.22075	1.1798	1.1071	1.2322	1.17526	1.21151	1.16086	1.00928	1.26762	1.19978	1.23427	1.36268	1.11841	1.06204	1.11765	1.36976	1.26442	1.25847	0.52524	1.09081	1.34069	1.29043	1.29507	1.46526
YES	VANDAL12	0.871775	0.930343	1.22978	1.03514	0.868551	1.21897	0.984332	1.02348	0.87615	0.984421	0.945541	0.999845	1.42904	0.936125	0.960618	1.08914	1.09406	0.887902	1.06887	0.923647	0.997667	1.13206	0.970915	0.995088	0.901398	0.939833	0.836123	1.04412	0.966742	1.07357	0.783119	1.19831	1.17338	1.22446	1.2489	1.01906	0.910295	1.16268	0.996365	0.899511	0.936389	0.94822	0.905676	0.85619	0.966976	0.955971	1.0457	1.094
YES	VANDAL13	2.15717	2.07915	1.5477	3.07572	3.21107	2.20732	1.51421	0.847587	1.48061	2.54788	2.13674	1.3842	0.96521	3.50192	2.91852	1.97395	2.28219	2.85596	2.17311	2.62006	0.173291	5.13024	0.163464	2.42971	0.165653	1.94801	3.20764	2.07992	3.35981	1.25384	1.2939	1.54218	2.4354	1.43238	2.20748	2.87942	3.30235	1.84189	1.8685	3.33924	2.29033	0.5204	0.164842	0.217035	2.07995	2.63394	2.16057	0.860166
YES	VANDAL14	7.19708	8.39635	5.76489	2.95064	2.57379	1.43389	1.47286	0.378658	0.00937353	2.47914	0.00586871	4.607	2.97815	0.392188	4.94701	2.65266	5.54807	1.86731	0.00692025	2.73153	3.01638	1.6761	2.7712	2.64689	4.04912	1.81268	0.310451	2.72643	2.2165	1.30506	2.85367	2.35756	2.39002	0.390854	0.0126824	4.93121	0.00497982	2.42969	0.947587	2.86848	2.53764	1.59211	3.50406	0.743609	0.0057068	3.25777	1.49345	0.00623908
NO	VANDAL15	2.11899	2.88367	2.77387	2.57662	2.26965	2.84522	3.27088	2.47104	3.38635	2.92502	2.88942	2.94849	3.69836	2.74414	1.43822	2.45765	2.27558	2.90305	2.89959	2.3969	2.49953	2.59887	2.34648	2.49388	2.19468	2.63786	1.20268	2.06458	1.50267	2.76595	2.47714	2.60454	2.91775	2.60071	2.93805	3.11343	2.76438	2.64696	2.43271	2.22631	2.95202	2.88367	2.30866	2.38522	1.339	2.46726	2.4188	2.81122
YES	VANDAL16	6.49393	6.53084	4.91416	6.4337	6.40172	5.86814	6.09134	5.27092	9.11283	7.05083	7.09012	5.92355	6.4563	5.3308	3.48768	7.62073	5.85337	7.84464	8.99764	6.3566	7.89061	8.54283	7.22324	4.52943	6.19908	7.54456	7.36064	5.1791	7.88373	11.371	7.33323	4.96844	8.22848	6.39275	7.09764	5.09281	12.4955	6.91883	7.13948	6.98875	8.17465	7.34429	5.83904	4.59479	6.01338	4.88619	5.94181	5.94812
YES	VANDAL17	5.1845	5.26496	5.58662	9.57037	8.18204	9.75349	7.49602	9.25008	8.32036	4.9854	8.34456	10.5694	7.69827	9.53928	4.41645	5.80033	18.4358	9.00747	6.29514	13.4236	6.43664	7.3561	6.16366	7.02018	6.16293	5.41881	7.23325	6.11088	4.67211	5.62464	8.96326	9.6714	10.3057	7.80283	7.56059	13.263	4.27884	10.5466	8.4459	9.36016	6.0541	10.2003	12.1284	8.65823	6.30071	6.07891	9.52826	8.23115
YES	VANDAL18	0.963091	0.948108	10.7253	9.69528	8.77001	9.72656	8.80841	12.9744	6.41511	7.34143	7.98241	9.09505	8.72482	11.4627	10.4873	9.62932	10.1408	5.93869	10.7531	7.2485	9.96186	9.61732	9.30363	13.5185	10.9279	9.63755	8.32233	10.8183	7.49163	8.78256	10.553	11.5502	8.75623	11.1276	8.97163	8.62609	8.40831	9.34905	10.1583	9.65095	6.66846	9.43616	9.58956	11.6632	9.19953	9.8442	11.4573	13.9314
NO	VANDAL18NA	10.536	10.9539	7.88268	5.82379	7.85396	6.00203	6.5699	6.24122	5.95532	5.58507	5.01413	5.50398	4.88165	8.68444	8.70189	9.07577	8.58314	6.92544	4.95822	6.90717	5.62135	5.9088	6.0776	9.05805	5.2203	7.91372	5.40448	7.99878	6.85134	7.23947	7.70168	5.74499	7.19104	6.13553	8.78854	6.75821	6.352	8.69439	6.64684	6.19069	7.60803	6.5778	7.46041	6.12226	4.70402	9.29226	5.38975	5.50989
NO	VANDAL18NB	7.80923	7.87902	1.33104	1.35216	0.00190626	1.44434	0	0	1.49135	0.115625	0	0.00150959	0.0020522	0	1.22382	1.20888	1.22468	0.000422585	1.4583	1.25314	0.00101765	1.53543	0	0.00381074	0.015077	0.00171511	0.769547	0.00108431	0	0	1.21926	1.09865	1.39978	0.00181309	0.0033933	1.47282	0.000536286	0.00289844	0.451023	0.000250929	0.000509649	0	1.04519	0.649961	0.00112262	1.24049	1.48561	0.00111985
YES	VANDAL1N1	17.4124	16.7529	11.2473	14.0605	7.25269	6.49477	13.0636	7.31796	11.9821	8.44773	8.43646	15.3944	7.02451	6.65501	7.3999	8.91116	10.2847	11.3271	12.9549	12.4405	8.77865	10.0281	8.17734	9.32986	8.38806	12.5999	9.18664	9.96152	10.503	8.97042	4.43174	7.92012	8.19434	10.2684	10.1295	9.52513	9.31661	8.14722	8.31548	11.9935	10.0815	8.27895	10.6855	5.19606	13.0715	10.5797	6.52394	8.61765
NO	VANDAL2	19.0988	21.087	21.3635	23.8026	19.5614	21.4582	24.1451	17.5352	22.2652	25.1798	24.8675	19.6112	24.2792	24.9325	22.8373	21.6106	17.0766	19.6368	18.4759	16.952	22.2968	18.5395	21.6286	18.3369	21.5837	22.9309	20.0525	17.3168	20.383	20.2697	15.8684	14.9439	23.5491	26.1548	24.1618	21.5671	21.0554	14.4427	19.7725	20.1439	20.5576	22.7672	17.2491	21.6422	25.155	19.0429	18.4057	23.3242
YES	VANDAL20	4.88239	4.90956	4.8556	6.14347	3.34484	8.49974	6.88848	3.67086	5.98387	6.55449	9.05404	6.78739	8.18294	8.47417	5.78398	5.2484	5.79807	5.21787	6.55326	5.82848	6.2843	7.34716	5.81767	5.75647	5.85924	4.02029	5.97896	5.24083	4.88085	5.63225	7.43401	4.45839	5.60298	6.42232	4.71578	6.90142	5.32019	3.84614	4.19851	6.501	6.53198	5.13905	4.8765	6.03389	6.71421	8.79704	5.43223	4.00705
YES	VANDAL21	16.2595	16.7216	20.5979	24.6617	15.1662	26.5663	26.7095	25.7976	26.4893	23.2452	21.849	22.5664	22.134	24.3737	17.3103	21.247	19.6444	18.2572	27.5196	22.1903	23.2643	25.2556	21.5047	21.732	22.2878	33.0695	23.0794	28.822	25.8522	29.4714	22.6471	18.3938	17.0473	24.3658	19.1828	24.282	26.6315	20.1075	25.8874	26.9084	18.7636	26.5939	15.801	18.0065	26.1556	18.809	27.5478	27.8973
YES	VANDAL22	2.14022	2.03882	2.94191	3.04259	2.15585	3.28107	3.07031	3.10907	2.87042	2.17855	2.73313	3.04944	3.1901	2.9759	2.66684	2.3267	2.68137	2.44208	2.6622	2.91318	3.31344	2.83697	3.10823	2.87371	2.59214	3.02034	2.85986	2.85621	2.93548	3.143	2.5331	2.17229	1.82622	3.15037	2.02814	2.90679	2.85129	2.05795	2.95063	2.95545	3.29268	2.96312	2.63539	2.40436	3.32127	2.53616	2.56245	3.88332
YES	VANDAL2N1	17.9395	18.1202	16.1132	17.1636	13.8579	19.0773	12.2084	19.9635	25.9913	17.5192	13.532	21.3255	19.1419	17.0737	16.9591	13.6745	12.5276	7.99142	15.3169	13.7358	16.8515	18.149	15.4889	15.8531	13.2562	9.10775	13.9939	16.3552	15.3547	16.832	23.8673	12.9134	12.4039	19.5647	17.6908	14.5291	23.7068	11.7249	11.0852	18.998	14.6964	15.7752	9.84101	13.7638	19.2436	14.1886	18.6038	27.7939
YES	VANDAL3	10.307	9.9409	16.8724	12.7131	11.459	16.2375	17.2555	12.8553	15.7752	16.2892	13.909	12.8496	16.8702	16.9305	13.4013	12.469	12.2247	20.3318	11.4883	15.3595	11.9797	9.61914	11.0746	16.6148	14.0797	10.7032	12.5151	9.37426	13.3044	13.68	10.0249	13.7871	13.9746	15.1943	19.4507	12.7509	14.0732	12.1647	13.21	11.2682	9.07592	14.2933	9.6506	12.2974	9.23503	13.2046	14.0712	17.8428
YES	VANDAL4	5.27344	5.17028	5.40157	6.5678	5.35824	5.50723	4.27656	6.94514	2.87398	4.79164	6.01282	4.44712	5.45706	4.8309	4.55656	4.53985	2.97686	4.59444	5.79588	4.80206	5.77018	7.00524	5.42188	4.39423	5.38638	6.24315	5.639	2.19787	4.13725	3.59804	7.26159	2.47271	6.09175	4.72555	5.35111	5.54563	5.03476	6.05875	6.04325	7.13808	5.46958	6.00521	5.45795	5.84597	4.47753	4.50616	3.91462	6.35588
YES	VANDAL5	5.04219	5.08384	5.44432	6.69256	5.36758	5.28072	7.37963	3.89005	4.91106	5.57137	3.59959	5.22013	5.64697	4.67332	3.109	4.89983	4.38618	4.54152	5.73362	4.39867	6.46866	5.25446	6.03857	4.66838	6.29979	6.1867	4.71299	5.98068	5.2585	5.40305	5.52604	3.53456	5.55122	5.39601	6.13329	4.987	6.11197	4.15579	6.40601	6.75918	4.81967	4.83361	6.43627	4.88444	6.22137	4.83348	5.85503	4.98946
YES	VANDAL5A	1.30891	1.35621	0.556211	1.63134	0.762927	0.515478	0.778973	0.251521	0.205197	0.508736	0.132961	0.558458	0.61937	0.798105	0.238951	0.292891	0.406255	0.682695	0.577494	1.03239	0.955904	0.280522	0.892596	0.222469	0.652451	0.84517	0.518536	0.446144	0.32833	0.498675	0.548085	0.199412	1.29269	0.448929	0.802558	0.580575	0.405362	0.490087	0.732225	1.50498	0.558123	1.64308	1.37779	0.657662	0.624503	0.34199	1.38541	0.295207
YES	VANDAL6	13.8174	14.7758	15.7794	15.0928	15.1342	11.2306	24.6233	8.5253	10.2538	15.0292	20.3287	16.4772	14.4248	15.6919	17.3646	13.9238	12.4055	11.3589	18.997	9.68096	16.3601	17.0107	15.1692	16.0806	13.086	12.4133	15.9093	17.1284	19.0039	17.4962	14.8816	8.41823	13.393	9.6948	15.3632	16.8203	7.77362	14.9103	14.6616	8.87169	17.6439	12.1461	4.94334	11.8734	19.8842	12.949	13.9792	12.2951
YES	VANDAL7	5.32409	5.47321	5.3573	6.62975	4.36975	4.03704	4.2776	5.91794	2.82476	4.02749	2.78499	6.13016	2.71019	3.99972	7.4104	4.69091	4.82359	4.09329	6.04531	3.75498	4.15773	1.36909	3.91156	3.79924	4.16605	7.86902	5.01199	4.0718	5.63405	3.81593	3.59419	4.70793	5.11634	3.5484	3.83946	5.60777	5.01767	3.37573	6.61926	5.28306	4.01548	5.25097	4.38754	3.38991	7.00434	4.855	2.88716	9.27915
YES	VANDAL8	7.34922	7.66629	10.7273	12.6027	10.1736	9.46052	17.4525	7.57127	10.8823	12.3721	9.09216	15.293	18.049	9.88757	11.5552	14.9225	11.7436	16.2143	10.0963	10.1047	13.732	11.4734	12.9889	11.7241	12.5698	13.4397	14.0062	13.4153	12.8248	13.7512	12.5933	9.99087	12.5636	13.7714	12.9449	11.2631	8.64847	5.57263	9.25874	15.1924	9.09935	17.4766	11.3512	10.3117	8.42102	7.40404	10.9966	7.39995
YES	VANDAL9	2.78864	2.78803	4.25674	2.82862	3.44926	2.9948	4.2889	4.22824	4.29972	4.22537	4.36769	4.68391	4.29236	4.01512	3.81333	3.70561	3.8637	4.12748	4.43633	2.68233	4.26201	4.5833	4.10163	2.88044	3.95585	4.03504	3.84393	4.28123	2.60879	3.92481	3.90385	2.5079	2.69262	4.35543	4.20604	4.54208	4.15087	3.26425	3.33586	2.96252	4.04245	4.40105	3.3439	1.64083	4.49482	3.86447	4.5058	4.49
YES	VANDALNX1	2.8154	2.76475	1.25176	3.54448	3.51879	3.2508	2.16266	2.30684	2.70693	2.11725	3.10078	2.25181	2.05029	2.8963	3.47184	2.57395	2.4785	3.55186	1.79597	1.91511	2.99275	2.86229	2.93667	3.54914	3.40848	3.36178	1.27467	2.32775	2.1726	1.85128	1.17057	3.34913	3.31489	3.38609	2.48337	2.90305	3.01359	2.0036	2.87786	3.11704	2.01566	2.05647	3.56153	3.57765	1.5876	2.38999	2.12972	3.04088
NO	VANDALNX2	6.45323	7.087	4.95399	4.98296	7.9991	3.21485	4.55922	4.94306	3.92232	3.63316	5.48787	3.7672	3.60703	5.23697	5.81726	4.85643	7.05299	4.00705	3.97294	3.95325	3.37986	4.01645	3.8906	5.61786	5.48316	8.07795	5.6345	3.33527	5.00239	5.20276	4.7439	5.03994	4.64469	4.22595	5.71403	3.63739	4.59689	6.19969	5.84295	5.21298	5.98341	4.51164	5.33203	6.87534	3.85872	6.17563	4.39374	3.25382
[truncated: 164 more columns]
