# Supplementary material for: The Arabidopsis thaliana mobilome and its impact at the species level
Source: eLife journal article supplement (doi:10.7554/elife.15716), 2016-06-03
Supplement: supp [file elife-15716-supp-v1.zip › elife_poa_e15716_Figure_1_source_data_3.pdf]

Figure 1 - Source data 3

| Family       | # Insertions |
|--------------|--------------|
| <b>COPIA</b> | <b>1408</b>  |
| ATCOPIA78    | 279          |
| META1        | 172          |
| ATCOPIA93    | 132          |
| ATCOPIA28    | 86           |
| ATCOPIA4     | 75           |
| ATCOPIA21    | 53           |
| ATCOPIA52    | 43           |
| ATCOPIA31    | 40           |
| ATCOPIA36    | 39           |
| ATCOPIA23    | 36           |
| ATCOPIA3     | 35           |
| ATCOPIA57    | 35           |
| ATCOPIA63    | 35           |
| ATCOPIA72    | 33           |
| ENDOVIR1     | 32           |
| ATCOPIA2     | 31           |
| ATCOPIA69    | 28           |
| ATCOPIA12    | 26           |
| ATCOPIA49    | 20           |
| ATCOPIA75    | 19           |
| ATCOPIA74    | 15           |
| ATCOPIA11    | 13           |
| ATRE1        | 13           |
| ATCOPIA26    | 10           |
| ATCOPIA27    | 10           |
| ATCOPIA35    | 9            |
| ATCOPIA22    | 8            |
| ATCOPIA45    | 8            |
| ATCOPIA48    | 8            |
| ATCOPIA85    | 8            |
| ATCOPIA13    | 7            |
| ATCOPIA65    | 7            |
| ATCOPIA58    | 6            |
| ATCOPIA56    | 4            |
| ATCOPIA90    | 4            |
| ATCOPIA15    | 3            |
| ATCOPIA62    | 3            |
| ATCOPIA16    | 2            |
| ATCOPIA67    | 2            |
| ATCOPIA89    | 2            |
| ATCOPIA8B    | 2            |
| ATCOPIA97    | 2            |
| ATCOPIA1     | 1            |
| ATCOPIA10    | 1            |
| ATCOPIA14    | 1            |
| ATCOPIA18    | 1            |
| ATCOPIA20    | 1            |
| ATCOPIA25    | 1            |
| ATCOPIA32    | 1            |
| ATCOPIA47    | 1            |
| ATCOPIA55    | 1            |
| ATCOPIA79    | 1            |
| ATCOPIA8A    | 1            |
| ATCOPIA95    | 1            |
| TA1-AT       | 1            |
| <b>Gypsy</b> | <b>34</b>    |
| ATGP1        | 13           |
| ATGP3        | 8            |
| ATLANTYS2    | 5            |
| ATGP9B       | 4            |
| ATGP2        | 2            |
| ATLANTYS1    | 1            |
| TA1-2        | 1            |
| <b>LINE</b>  | <b>85</b>    |
| ATLINEIII    | 41           |
| ATLINE2      | 21           |
| ATLINE1A     | 12           |
| ATLINE1_1    | 5            |
| ATLINE1_2    | 3            |
| ATLINE1_5    | 2            |
| TSCL         | 1            |

|                  |            |
|------------------|------------|
| <b>MuDR</b>      | <b>729</b> |
| VANDAL6          | 95         |
| ATDNA2T9A        | 83         |
| VANDAL14         | 47         |
| VANDAL17         | 44         |
| AT9NMU1          | 41         |
| ATMU4            | 39         |
| VANDAL2N1        | 34         |
| VANDAL1          | 33         |
| VANDAL3          | 29         |
| VANDAL21         | 28         |
| VANDAL22         | 26         |
| VANDAL16         | 23         |
| VANDAL5          | 20         |
| ATDNAI26T9       | 16         |
| ARNOLD2          | 14         |
| ATMU6            | 14         |
| ATDNA2T9B        | 13         |
| ATMU3            | 11         |
| VANDAL1N1        | 11         |
| ATDNA2T9C        | 10         |
| ATDNAI27T9B      | 10         |
| ATMU1            | 10         |
| ATMU7            | 10         |
| AT9TSD1          | 9          |
| ATDNA1T9A        | 9          |
| ARNOLDY2         | 8          |
| ATMU3N1          | 8          |
| ATMU6N1          | 6          |
| BOMZH1           | 5          |
| AT9MU1           | 4          |
| ATDNAI27T9C      | 4          |
| ATMU2            | 3          |
| VANDAL20         | 3          |
| ATMU10           | 2          |
| VANDAL13         | 2          |
| ARNOLD1          | 1          |
| ARNOLDY1         | 1          |
| BRODYAGA1        | 1          |
| BRODYAGA1A       | 1          |
| VANDAL11         | 1          |
| <b>En-Spm</b>    | <b>185</b> |
| ATENSPM5         | 55         |
| ATENSPM9         | 50         |
| ATENSPM2         | 25         |
| ATENSPM3         | 18         |
| ATENSPM1A        | 15         |
| ATENSPM4         | 13         |
| ATENSPM1         | 8          |
| ATENSPM11        | 1          |
| <b>hAT</b>       | <b>303</b> |
| TAG1             | 126        |
| SIMPLEHAT2       | 69         |
| ATHAT3           | 37         |
| TAG2             | 32         |
| SIMPLEHAT1       | 23         |
| ATHATN6          | 13         |
| ATHAT7           | 2          |
| ATHATN10         | 1          |
| <b>Pogo</b>      | <b>7</b>   |
| ATHPOGON3        | 7          |
| <b>Harbinger</b> | <b>70</b>  |
| HARBINGER        | 48         |
| SIMPLEGUY1       | 10         |
| <b>DNA</b>       | <b>14</b>  |
| ATDNA12T3A       | 6          |
| ATTIR16T3A       | 8          |
