# Supplementary material for: The Arabidopsis thaliana mobilome and its impact at the species level
Source: eLife journal article supplement (doi:10.7554/elife.15716), 2016-06-03
Supplement: supp [file elife-15716-supp-v1.zip › elife_poa_e15716_Figure_1_source_data_4.xlsx]

## Sheet: A
		Col-0 position			Ler-1 position
FAMILY	ELEMENT	CHR	START	END	SCAFFOLD	START	END	Detection by split-reads	TSD	DNA methylation spreading	TE methylation
VANDAL14	AT1TE09080	Chr1	2788430	2800701	scf7180000001633|quiver	6035508	6035524	1	1	Short-distance spreading	Meth
ATCOPIA78	AT1TE12295	Chr1	3780765	3785721	scf7180000001633|quiver	5035806	5035817	1	1	Short-distance spreading	Meth
AT9NMU1	AT1TE13365	Chr1	4110104	4111021	scf7180000001633|quiver	4704442	4704454	1	1	Long-distance spreading	Meth
ATMU4	AT1TE14085	Chr1	4329877	4334393	scf7180000001633|quiver	4467243	4467256	0	0	Short-distance spreading	Meth
META1	AT1TE14315	Chr1	4405996	4411119	scf7180000001633|quiver	4395487	4395497	1	1	Short-distance spreading	Meth
BRODYAGA2	AT1TE17415	Chr1	5391427	5392691	scf7180000001633|quiver	3416731	3417145	0	1	No spreading	Meth
ATREP2	AT1TE18955	Chr1	5862942	5863537	scf7180000001633|quiver	2950316	2950353	0	0	No spreading	Meth
SIMPLEHAT1	AT1TE21805	Chr1	6742979	6744224	scf7180000001633|quiver	2084302	2084307	0	1	Short-distance spreading	Meth
VANDAL1N1	AT1TE23420	Chr1	7254947	7257226	scf7180000001633|quiver	1587007	1587021	1	1	Short-distance spreading	Meth
VANDAL14	AT1TE23740	Chr1	7352930	7365197	scf7180000001633|quiver	1490225	1490239	1	1	Short-distance spreading	Meth
ATCOPIA78	AT1TE24850	Chr1	7714708	7722547	scf7180000001633|quiver	1144480	1144490	1	1	Short-distance spreading	Meth
VANDAL6	AT1TE27295	Chr1	8453486	8461797	scf7180000001633|quiver	401860	401870	0	1	Short-distance spreading	Meth
VANDAL2	AT1TE29060	Chr1	9004836	9015724	scf7180000001632|quiver	551080	551091	0	0	No spreading	Meth
VANDAL2	AT1TE31190	Chr1	9676477	9691257	scf7180000001386|quiver	2670580	2670589	0	1	Short-distance spreading	Meth
AT9NMU1	AT1TE34895	Chr1	10802426	10803341	scf7180000001386|quiver	1545780	1545790	0	1	No spreading	Meth
ATREP10	AT1TE36715	Chr1	11351513	11352405	scf7180000001386|quiver	1005456	1005051	0	0	Short-distance spreading	Meth
ATCOPIA31	AT1TE38210	Chr1	11789450	11794079	scf7180000001386|quiver	564632	564645	1	1	Short-distance spreading	Meth
ATREP2A	AT1TE39535	Chr1	12183406	12184060	scf7180000001386|quiver	171872	171941	0	0	Short-distance spreading	Meth
ATCOPIA35	AT1TE39880	Chr1	12273260	12276388	scf7180000001386|quiver	79355	79374	1	1	No spreading	Meth
VANDAL16	AT1TE41350	Chr1	12674460	12684931	scf7180000001655|quiver	1655425	1655433	0	1	Short-distance spreading	Meth
BRODYAGA1A	AT1TE41525	Chr1	12738313	12740004	scf7180000001655|quiver	1599366	1599377	1	1	Short-distance spreading	Meth
BRODYAGA1	AT1TE41995	Chr1	12895317	12896538	scf7180000001655|quiver	1517297	1517312	1	1	No spreading	Meth
ATENSPM2	AT1TE42210	Chr1	12942825	12947010	scf7180000001655|quiver	751552	751556	1	1	No spreading	Meth
ATENSPM5	AT1TE42890	Chr1	13131405	13140006	scf7180000001655|quiver	1245695	1245700	1	1	Short-distance spreading	Meth
SIMPLEHAT1	AT1TE42930	Chr1	13151880	13152923	scf7180000001655|quiver	1233752	1233764	1	1	Long-distance spreading	Meth
VANDAL14	AT1TE43050	Chr1	13187278	13192359	scf7180000001655|quiver	1215877	1215888	1	1	Long-distance spreading	Meth
ATREP10B	AT1TE43845	Chr1	13407453	13409316	scf7180000001655|quiver	995631	995650	0	0	No spreading	Unmethylated
VANDAL6	AT1TE44125	Chr1	13482748	13490426	scf7180000001655|quiver	904430	904442	1	1	Long-distance spreading	Meth
ATGP1	AT1TE45560	Chr1	13883073	13890962	scf7180000001655|quiver	510448	510464	0	1	Short-distance spreading	Meth
ATDNA1T9A	AT1TE53825	Chr1	16343290	16346824	scf7180000001639|quiver	7340958	7340981	0	0	Long-distance spreading	Meth
ATCOPIA4	AT1TE55795	Chr1	16853329	16858040	scf7180000001639|quiver	6818911	6818921	1	1	Short-distance spreading	Meth
VANDAL4	AT1TE56135	Chr1	16942841	16962196	scf7180000001639|quiver	6720940	6720954	0	1	Short-distance spreading	Meth
VANDAL1	AT1TE56420	Chr1	17035033	17050039	scf7180000001639|quiver	6618775	6618791	1	1	Short-distance spreading	Meth
ATLINE1_4	AT1TE58410	Chr1	17596590	17597178	scf7180000001639|quiver	6090423	6090434	1	1	No spreading	Unmethylated
BRODYAGA2	AT1TE58650	Chr1	17665030	17666250	scf7180000001639|quiver	6029844	6029862	0	1	No spreading	Meth
ATMU7	AT1TE59235	Chr1	17842303	17845285	scf7180000001639|quiver	5859085	5859086	0	1	Short-distance spreading	Meth
ATCOPIA78	AT1TE59755	Chr1	18013162	18018435	scf7180000001639|quiver	5693941	5694193	0	0	Long-distance spreading	Meth
ATCOPIA48	AT1TE66380	Chr1	20085179	20090143	scf7180000001639|quiver	3645290	3645305	1	1	Short-distance spreading	Meth
ATDNAI27T9A	AT1TE69285	Chr1	20979423	20980832	scf7180000001639|quiver	2761982	2762192	0	0	Long-distance spreading	Meth
ATCOPIA26	AT1TE70190	Chr1	21244324	21249205	scf7180000001639|quiver	2459204	2459205	0	0	Long-distance spreading	Meth
ATCOPIA22	AT1TE70490	Chr1	21346162	21351041	scf7180000001639|quiver	2384550	2384558	1	1	Long-distance spreading	Meth
ATREP13	AT1TE70735	Chr1	21428116	21428825	scf7180000001639|quiver	2302189	2302307	0	0	No spreading	Meth
ATLINE1_1	AT1TE70805	Chr1	21450132	21455990	scf7180000001639|quiver	2280646	2280652	0	1	Long-distance spreading	Meth
ATREP2	AT1TE72330	Chr1	21918430	21918995	scf7180000001639|quiver	1870000	1870014	0	0	No spreading	Meth
ATMU6N1	AT1TE74430	Chr1	22562685	22563702	scf7180000001639|quiver	1223696	1223706	1	1	Short-distance spreading	Meth
ATCOPIA51	AT1TE76215	Chr1	23118240	23123214	scf7180000001639|quiver	660431	660431	0	0	Short-distance spreading	Meth
ATTIRX1C	AT1TE77880	Chr1	23651611	23652016	scf7180000001639|quiver	112087	112091	0	1	Short-distance spreading	Meth
VANDAL1N1	AT1TE80035	Chr1	24350741	24352986	scf7180000001382|quiver	6095228	6095238	0	1	Long-distance spreading	Meth
ATREP10D	AT1TE81060	Chr1	24679817	24680722	scf7180000001382|quiver	5774373	5773616	0	0	No spreading	Unmethylated
SIMPLEGUY1	AT1TE81150	Chr1	24704987	24706028	scf7180000001382|quiver	5749304	5749315	0	0	No spreading	Meth
ATMU2	AT1TE82600	Chr1	25159043	25163500	scf7180000001382|quiver	5296226	5296429	0	0	No spreading	Meth
SIMPLEGUY1	AT1TE85105	Chr1	25975951	25977038	scf7180000001382|quiver	4478893	4478933	0	0	No spreading	Meth
ATCOPIA11	AT1TE86360	Chr1	26366603	26371673	scf7180000001382|quiver	4079093	4079102	1	1	Short-distance spreading	Meth
ATMU3	AT1TE96425	Chr1	29474555	29479485	scf7180000001382|quiver	944360	944562	0	0	Long-distance spreading	Meth
ATREP1	AT1TE97390	Chr1	29774232	29775138	scf7180000001382|quiver	649834	649862	0	0	Short-distance spreading	Meth
ATREP10	AT2TE00985	Chr2	240847	241949	scf7180000001671|quiver	198572	198596	0	0	Short-distance spreading	Meth
ATLINEIII	AT2TE01000	Chr2	243804	249211	scf7180000001671|quiver	200456	200470	0	1	No spreading	Meth
ARNOLD1	AT2TE02465	Chr2	566757	582571	scf7180000001671|quiver	516223	516236	1	1	Long-distance spreading	Meth
META1	AT2TE04085	Chr2	909734	914341	scf7180000001671|quiver	847876	847880	0	1	Short-distance spreading	Meth
ATCOPIA28	AT2TE06390	Chr2	1388832	1393901	scf7180000001671|quiver	1293999	1294005	0	1	Short-distance spreading	Meth
META1	AT2TE06405	Chr2	1395260	1399516	scf7180000001671|quiver	1295199	1295205	0	1	Short-distance spreading	Meth
ARNOLD2	AT2TE08110	Chr2	1741426	1757083	scf7180000001671|quiver	1698371	1698387	1	1	Short-distance spreading	Meth
ATCOPIA32	AT2TE13685	Chr2	3160553	3166309	scf7180000001674|quiver	53427	53435	1	1	Short-distance spreading	Meth
ATMU6	AT2TE18155	Chr2	4318006	4322177	scf7180000001592|quiver	700532	700547	1	1	No spreading	Meth
ATENSPM3	AT2TE20205	Chr2	4900803	4909281	scf7180000001592|quiver	1244510	1244514	0	1	No spreading	Meth
ATCOPIA27	AT2TE21855	Chr2	5394710	5399649	scf7180000001592|quiver	1636685	1636691	0	1	Long-distance spreading	Meth
AT9NMU1	AT2TE22480	Chr2	5557361	5558208	scf7180000001592|quiver	1763979	1763991	1	1	Short-distance spreading	Meth
ATCOPIA13	AT2TE23855	Chr2	5852699	5857428	scf7180000001587|quiver	9633084	9633091	1	1	Long-distance spreading	Meth
ATREP7	AT2TE27280	Chr2	6682174	6683112	scf7180000001373|quiver	13034616	13034617	0	0	No spreading	Meth
ATLINE1_4	AT2TE27670	Chr2	6778862	6785573	scf7180000001373|quiver	12951096	12951113	0	1	Long-distance spreading	Meth
BOMZH1	AT2TE29120	Chr2	7155511	7156608	scf7180000001373|quiver	12555471	12555481	0	1	Long-distance spreading	Meth
ATCOPIA39	AT2TE31290	Chr2	7598597	7602614	scf7180000001373|quiver	12084331	12084331	0	0	Long-distance spreading	Meth
ATREP13	AT2TE33540	Chr2	8075979	8078202	scf7180000001373|quiver	11614432	11614432	0	0	No spreading	Meth
ATCOPIA72	AT2TE37050	Chr2	8816056	8820891	scf7180000001626|quiver	8908103	8908104	0	1	Long-distance spreading	Meth
ATREP1	AT2TE38110	Chr2	9029775	9030696	scf7180000001373|quiver	10689299	10689353	0	0	Short-distance spreading	Meth
ATREP11	AT2TE38420	Chr2	9091139	9092376	scf7180000001373|quiver	10631628	10631867	0	0	No spreading	Meth
ATCOPIA74	AT2TE38575	Chr2	9121958	9125818	scf7180000001373|quiver	10602045	10602051	0	1	Short-distance spreading	Meth
SIMPLEHAT2	AT2TE41090	Chr2	9633548	9635121	scf7180000001373|quiver	10065538	10065552	1	1	Short-distance spreading	Meth
ATCOPIA75	AT2TE42485	Chr2	9927685	9932560	scf7180000001373|quiver	9764430	9764433	0	0	No spreading	Unmethylated
VANDAL21	AT2TE42810	Chr2	10001480	10009658	scf7180000001373|quiver	9692954	9692968	1	1	Short-distance spreading	Meth
VANDAL6	AT2TE43165	Chr2	10085509	10093594	scf7180000001373|quiver	9621540	9621550	0	1	Short-distance spreading	Meth
BOMZH1	AT2TE44750	Chr2	10436266	10437353	scf7180000001373|quiver	9273055	9273072	1	1	Short-distance spreading	Meth
ATCOPIA12	AT2TE45020	Chr2	10488229	10491804	scf7180000001373|quiver	9222331	9222343	1	1	No spreading	Unmethylated
VANDAL3	AT2TE45465	Chr2	10592185	10609120	scf7180000001373|quiver	9102084	9102095	1	1	No spreading	Meth
ATREP10	AT2TE50120	Chr2	11555402	11556304	scf7180000001373|quiver	8165102	8165105	0	0	No spreading	Meth
ATCOPIA63	AT2TE54780	Chr2	12539441	12541817	scf7180000001373|quiver	7169122	7169129	0	1	No spreading	Unmethylated
VANDAL14	AT2TE54910	Chr2	12566155	12578422	scf7180000001373|quiver	7143715	7143730	1	1	Short-distance spreading	Meth
ATDNA2T9A	AT2TE55690	Chr2	12738687	12740291	scf7180000001373|quiver	6979446	6979453	0	0	No spreading	Unmethylated
ATMU7	AT2TE69630	Chr2	15595121	15597210	scf7180000001373|quiver	4122878	4122891	0	0	Short-distance spreading	Meth
AT9NMU1	AT2TE72380	Chr2	16150387	16151304	scf7180000001373|quiver	3563565	3563580	1	1	No spreading	Meth
SIMPLEHAT1	AT2TE74725	Chr2	16625761	16626817	scf7180000001373|quiver	3089309	3089319	0	1	No spreading	Meth
VANDAL16	AT3TE11850	Chr3	2808422	2818893	scf7180000001384|quiver	2833499	2833511	1	1	Short-distance spreading	Meth
ATMU6	AT3TE14865	Chr3	3538065	3538351	scf7180000001384|quiver	3576832	3576847	1	1	No spreading	Meth
ATDNAI27T9A	AT3TE24910	Chr3	5929425	5930702	scf7180000001384|quiver	5975384	5975395	0	1	Long-distance spreading	Meth
AT9NMU1	AT3TE27270	Chr3	6486327	6487244	scf7180000001609|quiver	2378930	2378936	0	1	Short-distance spreading	Meth
ATDNAI26T9	AT3TE33960	Chr3	8093489	8095938	scf7180000001609|quiver	779499	779514	1	1	No spreading	Unmethylated
LIMPET1	AT3TE33980	Chr3	8101039	8102913	scf7180000001609|quiver	774413	774420	0	1	Short-distance spreading	Meth
VANDAL14	AT3TE40530	Chr3	9723884	9736151	scf7180000001657|quiver	853364	853383	1	1	Long-distance spreading	Meth
BOMZH1	AT3TE40820	Chr3	9808122	9809189	scf7180000001657|quiver	944390	944402	1	1	Short-distance spreading	Meth
ATCOPIA31A	AT3TE44000	Chr3	10577158	10581824	scf7180000001657|quiver	1715661	1715667	0	1	No spreading	Unmethylated
ATREP12	AT3TE44695	Chr3	10751089	10752363	scf7180000001657|quiver	1904363	1904387	0	0	No spreading	Meth
TAG2	AT3TE46170	Chr3	11097260	11099626	scf7180000001657|quiver	2244875	2244884	0	1	Short-distance spreading	Meth
ATCOPIA14	AT3TE46255	Chr3	11122707	11127674	scf7180000001657|quiver	2273047	2273060	1	1	No spreading	Unmethylated
ATCOPIA27	AT3TE47235	Chr3	11335553	11341895	scf7180000001657|quiver	2540587	2540593	0	1	Short-distance spreading	Meth
ATCOPIA63	AT3TE48480	Chr3	11664969	11669787	scf7180000001657|quiver	2854391	2854397	0	1	No spreading	Meth
ATCOPIA78	AT3TE54550	Chr3	13369174	13374108	scf7180000001373|quiver	9052890	9052903	1	1	Long-distance spreading	Meth
SIMPLEGUY1	AT3TE60025	Chr3	14676582	14677720	scf7180000001626|quiver	302289	302298	1	1	No spreading	Meth
ATENSPM9	AT3TE69350	Chr3	17106151	17115098	scf7180000001626|quiver	2764150	2764158	1	1	No spreading	Meth
TAG3N1	AT3TE73190	Chr3	18055221	18056033	scf7180000001626|quiver	3748941	3748983	0	0	No spreading	Unmethylated
ATCOPIA52	AT3TE76225	Chr3	18791152	18796089	scf7180000001626|quiver	4501361	4501372	1	1	Long-distance spreading	Meth
ATCOPIA78	AT3TE89830	Chr3	22059535	22064329	scf7180000001626|quiver	7760478	7760489	1	1	Long-distance spreading	Meth
VANDAL2N1	AT3TE90030	Chr3	22112933	22115657	scf7180000001626|quiver	7808760	7808780	0	0	Short-distance spreading	Meth
ATCOPIA78	AT3TE92525	Chr3	22695566	22700522	scf7180000001626|quiver	8303595	8303606	1	1	Short-distance spreading	Meth
ATREP2	AT3TE94135	Chr3	23085518	23086101	scf7180000001626|quiver	8690302	8690315	0	0	No spreading	Unmethylated
ATREP3	AT4TE05105	Chr4	999917	1002008	scf7180000001662|quiver	1734265	1734270	0	0	No spreading	Meth
ATREP10	AT4TE06655	Chr4	1301948	1302908	scf7180000001662|quiver	1432962	1432971	0	0	Long-distance spreading	Meth
ATCOPIA56	AT4TE12355	Chr4	2643338	2648818	scf7180000001662|quiver	924455	924462	1	1	Long-distance spreading	Meth
ATHATN2	AT4TE19630	Chr4	4664190	4664822	scf7180000001588|quiver	91343	91634	0	0	Long-distance spreading	Meth
SIMPLEHAT1	AT4TE22040	Chr4	5292981	5294223	scf7180000001588|quiver	676584	676599	1	1	No spreading	Meth
ATCOPIA55	AT4TE22095	Chr4	5303773	5309049	scf7180000001588|quiver	686195	686204	1	1	Short-distance spreading	Meth
META1	AT4TE22180	Chr4	5326461	5331583	scf7180000001588|quiver	704451	704459	1	1	No spreading	Meth
AT9NMU1	AT4TE23110	Chr4	5517833	5518722	scf7180000001588|quiver	899638	899658	1	1	No spreading	Meth
ATGP2N	AT4TE23410	Chr4	5581567	5586563	scf7180000001588|quiver	962531	962537	0	1	Long-distance spreading	Meth
BRODYAGA1A	AT4TE23545	Chr4	5618042	5619125	scf7180000001588|quiver	1001332	1001342	0	1	Long-distance spreading	Meth
AT9NMU1	AT4TE23815	Chr4	5681775	5682692	scf7180000001588|quiver	1066618	1066630	1	1	Short-distance spreading	Meth
ATCOPIA26	AT4TE24480	Chr4	5822426	5827300	scf7180000001588|quiver	1241334	1241350	1	1	Long-distance spreading	Meth
ATCOPIA51	AT4TE25200	Chr4	5987004	5991976	scf7180000001588|quiver	1319139	1319141	0	1	Short-distance spreading	Meth
ATDNAI26T9	AT4TE27185	Chr4	6376567	6379046	scf7180000001588|quiver	1701201	1701240	0	0	Short-distance spreading	Meth
ATCOPIA50	AT4TE27640	Chr4	6467401	6473067	scf7180000001588|quiver	1793540	1793550	0	0	Long-distance spreading	Meth
ATGP1	AT4TE27915	Chr4	6529315	6537160	scf7180000001588|quiver	1877058	1877073	1	1	Short-distance spreading	Meth
ATCOPIA7	AT4TE28200	Chr4	6588726	6593808	scf7180000001588|quiver	1927968	1927974	0	1	No spreading	Unmethylated
ATCOPIA57	AT4TE30225	Chr4	6992629	6994363	scf7180000001588|quiver	2336948	2336960	1	1	No spreading	Unmethylated
META1	AT4TE32060	Chr4	7359463	7364607	scf7180000001588|quiver	2717474	2717486	1	1	Long-distance spreading	Meth
SIMPLEHAT1	AT4TE35980	Chr4	8141781	8142803	scf7180000001588|quiver	3525691	3525702	0	1	Short-distance spreading	Meth
ATREP13	AT4TE42280	Chr4	9368717	9369387	scf7180000001588|quiver	4786287	4786331	0	0	No spreading	Unmethylated
ATGP2	AT4TE42950	Chr4	9508382	9512986	scf7180000001588|quiver	4909607	4909610	0	1	Long-distance spreading	Meth
META1	AT4TE43250	Chr4	9570499	9575603	scf7180000001588|quiver	5000997	5001004	0	1	No spreading	Meth
ATCOPIA1	AT4TE44080	Chr4	9732598	9737733	scf7180000001588|quiver	5160154	5160159	0	1	Short-distance spreading	Meth
META1	AT4TE44990	Chr4	9908996	9914045	scf7180000001588|quiver	5322885	5322895	0	1	Short-distance spreading	Meth
META1	AT4TE49990	Chr4	10899528	10904738	scf7180000001588|quiver	6312356	6312363	1	1	Short-distance spreading	Meth
ATREP11	AT4TE50445	Chr4	10999801	11000869	scf7180000001588|quiver	6392335	6392357	0	0	No spreading	Meth
ATDNA2T9A	AT4TE50860	Chr4	11080491	11082077	scf7180000001588|quiver	6451785	6451786	0	1	No spreading	Unmethylated
ATCOPIA22	AT4TE53965	Chr4	11676468	11681340	scf7180000001588|quiver	7018977	7018987	1	1	Short-distance spreading	Meth
HARBINGER	AT4TE54750	Chr4	11834129	11838651	scf7180000001588|quiver	7181713	7181715	0	1	Short-distance spreading	Meth
ATCOPIA11	AT4TE56270	Chr4	12129314	12131466	scf7180000001588|quiver	7479397	7479409	1	1	No spreading	Unmethylated
ATTIRX1C	AT4TE60280	Chr4	12892354	12892759	scf7180000001588|quiver	8247939	8247943	0	1	No spreading	Unmethylated
ATHPOGON1	AT4TE60590	Chr4	12948910	12949516	scf7180000001588|quiver	8305485	8305544	0	0	No spreading	Meth
VANDAL6	AT4TE67560	Chr4	14280183	14288304	scf7180000001377|quiver	696018	696028	0	1	Short-distance spreading	Meth
VANDAL3	AT4TE71330	Chr4	15013100	15013586	scf7180000001377|quiver	1443429	1443444	1	1	Long-distance spreading	Meth
BRODYAGA1A	AT4TE73405	Chr4	15397745	15398694	scf7180000001377|quiver	1827999	1828011	0	1	No spreading	Meth
BRODYAGA2	AT4TE76155	Chr4	15922833	15924043	scf7180000001377|quiver	2360428	2360435	0	1	No spreading	Meth
ATCOPIA45	AT4TE85580	Chr4	17712148	17716980	scf7180000001377|quiver	4184271	4184285	1	1	Long-distance spreading	Meth
ATCOPIA27	AT5TE00230	Chr5	64772	71199	scf7180000001587|quiver	10046398	10046402	0	1	Short-distance spreading	Meth
ATHATN6	AT5TE03750	Chr5	1026499	1027067	scf7180000001587|quiver	9090161	9090170	0	1	No spreading	Meth
VANDAL1N1	AT5TE10940	Chr5	3005871	3007470	scf7180000001587|quiver	7094919	7094923	0	1	Short-distance spreading	Meth
ATCOPIA78	AT5TE15240	Chr5	4208083	4213084	scf7180000001587|quiver	5874683	5874692	1	1	Long-distance spreading	Meth
ATCOPIA93	AT5TE20395	Chr5	5629978	5635310	scf7180000001587|quiver	4476254	4476262	1	1	Long-distance spreading	Meth
ATMU3N1	AT5TE25115	Chr5	6926018	6926463	scf7180000001587|quiver	3207350	3207363	1	1	No spreading	Meth
ATREP10	AT5TE28355	Chr5	7833868	7834774	scf7180000001587|quiver	2270933	2270941	0	0	No spreading	Unmethylated
ATCOPIA22	AT5TE31200	Chr5	8624511	8629386	scf7180000001587|quiver	1461649	1461664	1	1	Long-distance spreading	Meth
SIMPLEHAT2	AT5TE31745	Chr5	8769450	8770675	scf7180000001587|quiver	1329091	1329103	1	1	No spreading	Meth
ATHILA7A	AT5TE33315	Chr5	9211109	9218667	scf7180000001587|quiver	886347	886353	0	1	No spreading	Meth
VANDAL8	AT5TE34730	Chr5	9561935	9571088	scf7180000001587|quiver	524228	524244	0	1	Long-distance spreading	Meth
VANDAL1	AT5TE38070	Chr5	10432877	10446801	scf7180000001586|quiver	308935	308953	1	1	Long-distance spreading	Meth
ATHILA6A	AT5TE41070	Chr5	11320501	11331866	scf7180000001739|quiver	59949	59963	0	0	No spreading	Unmethylated
ATHILA6A	AT5TE42440	Chr5	11810265	11821593	scf7180000001752|quiver	14629	14634	0	1	Long-distance spreading	Meth
HARBINGER	AT5TE44415	Chr5	12540559	12544395	scf7180000001639|quiver	1081581	1081589	1	1	Long-distance spreading	Meth
ATHILA6B	AT5TE47115	Chr5	13261021	13272510	scf7180000001598|quiver	198519	198525	0	1	No spreading	Meth
TAG3N1	AT5TE49330	Chr5	13839560	13840289	scf7180000001598|quiver	1165723	1165733	0	1	Short-distance spreading	Meth
ATCOPIA56	AT5TE49915	Chr5	13994796	14000227	scf7180000001598|quiver	1323893	1323904	1	1	Long-distance spreading	Meth
VANDAL2	AT5TE52200	Chr5	14502433	14517642	scf7180000001605|quiver	75693	75703	0	1	No spreading	Unmethylated
TAG2	AT5TE56560	Chr5	15636219	15639175	scf7180000001605|quiver	1226379	1226389	0	1	Long-distance spreading	Meth
ATCOPIA25	AT5TE56585	Chr5	15646197	15651173	scf7180000001605|quiver	1233742	1233753	1	1	Short-distance spreading	Meth
ATCOPIA83	AT5TE56645	Chr5	15685038	15689976	scf7180000001605|quiver	1252777	1252788	0	0	No spreading	Unmethylated
ATREP11A	AT5TE56960	Chr5	15779045	15779840	scf7180000001605|quiver	1345628	1345646	0	0	Short-distance spreading	Meth
VANDAL1N1	AT5TE61035	Chr5	16908096	16910311	scf7180000001605|quiver	2582655	2582666	0	1	No spreading	Meth
ATDNAI27T9A	AT5TE61705	Chr5	17085555	17086919	scf7180000001605|quiver	2758421	2758423	0	1	Short-distance spreading	Meth
ENDOVIR1	AT5TE63610	Chr5	17596759	17605846	scf7180000001605|quiver	3239131	3239132	0	1	Short-distance spreading	Meth
VANDAL14	AT5TE65330	Chr5	18119471	18131741	scf7180000001605|quiver	3753586	3753593	0	1	Short-distance spreading	Meth
ATCOPIA21	AT5TE65370	Chr5	18142156	18146898	scf7180000001605|quiver	3763985	3764003	1	1	Short-distance spreading	Meth
VANDAL18NA	AT5TE65460	Chr5	18171286	18172315	scf7180000001605|quiver	3788437	3788444	0	0	Short-distance spreading	Meth
ATCOPIA31	AT5TE66565	Chr5	18490606	18495234	scf7180000001605|quiver	4144714	4144722	1	1	Short-distance spreading	Meth
TAG3N1	AT5TE66580	Chr5	18500733	18501486	scf7180000001605|quiver	4150204	4150210	0	1	Short-distance spreading	Meth
ATCOPIA58	AT5TE68140	Chr5	18933096	18938943	scf7180000001605|quiver	4571767	4571775	1	1	Long-distance spreading	Meth
HELITRONY1E	AT5TE68915	Chr5	19152391	19153744	scf7180000001605|quiver	4780511	4780537	0	0	Short-distance spreading	Meth
TSCL	AT5TE72200	Chr5	20048358	20049583	scf7180000001605|quiver	5682778	5682792	0	1	No spreading	Unmethylated
SIMPLEGUY1	AT5TE72870	Chr5	20233164	20233830	scf7180000001605|quiver	5868487	5868489	0	0	Short-distance spreading	Meth
ATCOPIA85	AT5TE77610	Chr5	21542894	21546691	scf7180000001607|quiver	763338	763359	0	0	Long-distance spreading	Meth
ATCOPIA22	AT5TE79225	Chr5	22002017	22006884	scf7180000001607|quiver	1217802	1217815	1	1	Long-distance spreading	Meth
ATDNAI27T9B	AT5TE81030	Chr5	22510693	22512918	scf7180000001607|quiver	1751294	1751308	1	1	No spreading	Meth
ATREP12	AT5TE84250	Chr5	23431544	23432883	scf7180000001607|quiver	2672187	2672188	0	0	Short-distance spreading	Meth
ATDNAI27T9A	AT5TE85500	Chr5	23774322	23775709	scf7180000001607|quiver	3015206	3015207	0	0	Short-distance spreading	Meth
AT9NMU1	AT5TE94375	Chr5	26209504	26210488	scf7180000001607|quiver	5460729	5460742	1	1	No spreading	Meth

## Sheet: B
HEADER	DESCRIPTION
FAMILY	TE family for the given insertion
ELEMENT	TE element of the given insertion
CHR	Chromosome in Col-0 genome (TAIR10)
START	start, 1-based position before the TE insertion in Col-0 genome (TAIR10)
END	end, 1-based position after the TE insertion in Col-0 genome (TAIR10)
SCAFFOLD	Scaffold in Ler-1 genome (PacBio assembly from https://github.com/PacificBiosciences/DevNet/wiki/Arabidopsis-P5C3)
START	start, 1-based position before the TE insertion in Ler-1 genome (PacBio assembly from https://github.com/PacificBiosciences/DevNet/wiki/Arabidopsis-P5C3)
END	end, 1-based position after the TE insertion in Ler-1 genome (PacBio assembly from https://github.com/PacificBiosciences/DevNet/wiki/Arabidopsis-P5C3)
DETECTION BY SPLIT-READS	1, insertion is detected using both split-reads and genome sequece comaprison. 2, Insertions is only detected by genome sequence comparison
TSD	1, TSD is present. 2 TSD is lacking
DNA METHYLATION SPREADING	Type of DNA methylation spreading in Col-0
TE METHYLATION	Presece or absence of DNA metylation over TE sequence
