# Supplementary material for: The Arabidopsis thaliana mobilome and its impact at the species level
Source: eLife journal article supplement (doi:10.7554/elife.15716), 2016-06-03
Supplement: supp [file elife-15716-supp-v1.zip › elife_poa_e15716_Figure_2_source_data_1.xlsx]

## Sheet: A
TE FAMILY	Col-0A	Col-0B	Aa-0	Abd-0	Ag-0	Ak-1	Alst-1	Altai-5	Amel-1	An-1	Ang-0	Anholt-1	Ann-1	Anz-0	Appt-1	Ba-1	Baa-1	Bch-1	Bd-0	Benk-1	Ber	Bik-1	Bl-1	Bla-1	Boot-1	Bor-1	Bor-4	Br-0	Bs-1	Bsch-0	Bu-0	Buckhorn-Pass	Ca-0	Cal-0	Cerv-1	Chat-1	Chi-0	CIBC-17	CIBC-5	Cnt-1	Co-1	Com-1	Co	Cvi-0	Da1-12	Db-1	Di-G	Dja-1	Do-0
ARNOLD1	1.20506	1.3052	1.07746	0.531435	1.38388	0.444229	1.11098	0.61088	0.629346	0.582163	0.288915	0.517517	0.613088	0.278403	1.02449	0.383629	1.39581	0.819946	0.601519	0.446132	0.587721	0.683274	0.600938	0.951302	0.795646	0.436181	0.446347	0.721743	0.361825	0.554746	0.589648	1.35881	0.433744	0.639358	0.488575	0.521269	0.702019	0.363072	0.916791	0.48916	0.944627	0.934055	0.397603	0.462002	0.289932	1.06701	0.531573	0.999895	0.720045
ARNOLD2	7.41304	7.98284	7.76409	3.82002	8.17432	4.59794	6.05096	4.95429	4.34383	6.74851	3.03286	4.56242	5.18324	2.7004	6.8975	2.98356	3.96407	5.82267	3.47124	5.4394	4.5428	5.83811	4.45575	6.85577	5.58062	3.48143	3.6788	7.67169	5.62567	5.54068	5.04343	7.8449	4.57534	5.95762	6.3341	4.00278	7.01023	3.37956	4.41469	2.57385	4.692	5.42569	4.09333	3.67293	2.74388	5.50338	6.52044	7.02355	6.56799
ARNOLDY1	49.2897	50.3116	33.0401	34.5149	53.5146	26.5661	24.7807	35.4822	25.4394	25.413	26.9985	24.2303	23.4475	41.9343	38.622	45.2731	45.4613	32.0465	28.7027	37.0662	24.6624	26.037	33.7581	44.5388	39.1804	37.0091	35.1599	35.0747	36.2452	36.8956	36.6998	59.8137	32.8147	34.3298	38.526	26.2351	33.935	55.8146	42.8869	35.4871	39.7325	26.9099	52.5082	63.7131	23.9663	41.0716	27.7223	24.9803	40.3338
AT9MU1	3.55236	3.6197	2.71231	2.9758	2.77382	3.8476	2.08348	3.41064	1.4413	3.16367	2.0645	5.64754	1.23033	4.19823	2.8691	3.96926	5.78714	2.33515	2.08083	3.19436	2.1026	4.93966	1.90836	5.75499	3.1021	2.35705	2.07025	1.33754	3.46416	3.11023	2.88458	3.34607	2.11	6.9629	4.55038	2.26787	1.92215	2.23553	6.52387	4.00304	2.80614	2.2096	2.97085	3.08954	3.37396	3.66031	3.56743	1.9703	2.88834
AT9NMU1	14.6059	15.1323	10.12	13.9156	10.3555	9.66434	8.08064	9.83384	12.2884	7.30469	10.8813	6.6896	8.78134	6.47337	17.5815	13.4511	14.566	10.2084	13.7965	11.4952	8.37629	9.10876	8.87274	12.66	10.4799	14.9505	14.1062	10.0837	11.0456	7.64083	12.9233	10.7784	7.30215	15.3042	7.6253	9.75363	5.71041	11.9502	8.33864	6.2333	7.82515	8.96887	7.61288	14.7185	15.9589	9.75564	12.6612	6.56372	17.0487
AT9TSD1	11.419	11.3853	8.12826	8.03816	11.03	6.13026	7.19017	8.06795	7.4374	6.12909	8.27246	7.18449	7.07393	8.83052	6.52194	8.82319	13.8066	7.89417	6.86584	7.36322	5.82598	9.46789	6.37996	10.7309	8.1141	8.59057	9.46681	7.04195	9.4419	7.75821	7.42495	12.4576	7.86128	9.29205	9.63477	6.68109	7.91225	11.7594	8.49329	8.5445	10.8293	6.84197	11.8417	15.854	6.93489	9.51178	7.09962	6.36447	11.1643
ATCOPIA1	3.23323	3.02996	2.85065	3.21678	2.54325	3.20077	3.4646	2.91842	2.97267	3.02765	3.09132	3.2335	3.2818	2.83692	3.59639	2.58756	3.04104	3.09839	3.09316	2.99964	2.93061	3.03855	2.52555	2.8416	3.91883	2.91498	1.68409	2.84201	2.75861	2.97305	2.64704	2.74311	2.77963	2.69894	2.93346	4.88117	3.16495	3.09191	3.50874	3.13467	3.0853	3.4611	3.1982	3.40469	1.55765	2.63053	3.10642	4.78181	2.63826
ATCOPIA10	4.20878	3.96994	3.06293	5.83325	5.82042	6.32781	6.2219	5.84256	7.30235	5.12164	1.65808	6.33152	7.52372	6.19794	8.73659	4.11143	3.92182	8.10748	3.05212	2.96972	9.32949	6.24855	8.43815	5.44833	4.06158	4.41147	7.63717	3.02101	1.51366	7.30789	7.85191	4.43039	5.61376	5.43279	6.08278	5.69895	8.88308	3.74096	7.18039	1.68244	6.07869	7.36408	8.58788	1.63756	8.71665	5.3485	6.15116	8.14458	5.53988
ATCOPIA11	2.0673	1.94113	0.0367778	1.5025	1.998	2.99272	0.0764292	1.4922	1.42986	6.10815	2.61401	1.69291	0.514968	0.668439	1.44734	1.25232	1.29992	1.52336	0.0440976	1.28073	0.0864653	3.13307	0.0683938	1.35281	1.33961	0.0631745	0.84946	0.0715332	0.0358214	1.47471	3.58044	2.35339	2.63476	2.82312	0.0274553	3.18229	1.57251	2.43634	0.92747	1.47776	1.52339	3.17852	1.27093	3.26109	0.019296	2.45227	3.1535	1.71894	1.36221
ATCOPIA12	3.7881	3.8265	6.05138	7.88636	5.42481	6.7056	8.71424	5.20255	6.73245	6.55107	4.99564	6.56393	3.51157	5.99629	5.09583	5.94073	5.16992	4.29788	5.17246	3.24518	5.48143	4.97039	4.7842	3.62797	5.4156	3.12154	4.18086	4.57448	6.04088	4.75428	5.82953	4.8963	5.66031	4.50124	3.16557	3.57065	4.76576	8.21671	8.71217	8.28707	6.27964	9.18185	3.98993	3.74317	5.22501	2.65504	7.20813	6.78023	6.7479
ATCOPIA13	6.34844	6.28929	6.2593	4.64339	5.5053	4.84945	8.99347	4.29098	3.08258	5.43295	6.60245	9.03532	10.3252	5.91315	6.96939	3.78692	3.68284	9.04024	6.76451	6.80025	3.80401	7.70741	3.36792	5.53424	4.05003	7.18357	7.89602	4.63213	7.8373	4.3651	9.0914	4.83185	4.20191	4.60137	6.33444	5.53934	7.98404	3.93521	5.58855	6.80719	7.33867	5.65004	4.69745	4.13479	6.6118	5.21389	10.2313	5.60176	5.34516
ATCOPIA14	1.01551	0.985213	1.46219	0.00723931	1.02438	0.00943857	1.62275	0.00908965	0.0115759	1.46844	0.00872161	1.68607	1.75835	0.00252786	0.0105288	1.17009	0.00482323	0.010775	1.30679	1.35346	0.00565632	2.04899	0.00721737	0.00851128	1.21453	1.38221	1.28802	0.00994847	0.00783292	1.47501	1.35193	0.0103567	0.00963	1.48095	1.6017	1.66406	1.35361	0.0130025	1.50854	0.00558769	1.56755	0.0421365	1.3281	1.46307	0.011064	0.00995456	0.00731855	0.0111811	1.34661
ATCOPIA15	3.26104	3.34195	3.05565	3.01141	3.44106	3.09893	4.84444	3.52894	3.17875	3.10463	4.5293	3.19106	5.38836	3.01439	2.64877	2.50665	2.98506	2.90055	3.085	2.89168	4.88336	3.12821	4.1922	4.18469	4.16987	4.64422	2.7423	4.54995	1.93377	4.00722	2.80941	2.79279	4.60963	2.78132	3.99481	3.29353	2.84973	2.96377	4.65591	2.99739	4.43648	3.28725	1.85534	3.62053	4.89211	2.63681	3.09235	3.40706	2.66189
ATCOPIA16	3.22809	2.93077	4.28157	1.46492	3.39013	0.0316133	1.49881	2.10642	0.543526	3.13407	3.59009	1.48506	2.69097	4.43456	2.70067	1.35929	1.45948	1.39744	3.16894	2.82332	3.55447	3.38262	3.1478	4.40466	1.83646	2.84096	3.08505	0.493064	3.33642	1.97943	2.70327	2.77014	4.17842	2.01346	2.1143	1.69294	3.28272	1.46154	2.78649	4.66228	3.65569	3.66463	3.79345	1.51335	5.28369	2.76021	3.29361	1.82448	1.28387
ATCOPIA18	1.09418	1.00305	1.70059	1.58324	1.18699	1.59481	1.51755	1.69928	1.63585	1.67194	1.59641	1.60685	1.84565	1.68028	1.52049	1.32582	1.39014	1.5957	1.59576	1.48049	0.0351904	1.66358	0.0308083	1.38352	1.47799	1.55371	1.41481	1.63614	1.57541	1.42322	1.55165	1.41928	1.38686	1.55906	1.46907	1.82481	1.49553	1.33663	1.50297	1.56392	1.61721	1.74794	1.46019	1.27132	1.67741	1.36012	1.64668	1.81562	1.4723
ATCOPIA2	1.04792	1.00234	1.5461	1.45399	1.1243	0.00140113	0.00136732	5.02893	1.8471	1.95155	3.0617	3.98295	2.41755	1.67234	2.64048	0.168629	3.68027	1.753	1.01402	0.0017529	1.43909	5.82221	1.29648	0.00529428	1.36245	1.3717	2.77654	0.00142097	2.31062	3.30266	1.46532	2.07136	1.67529	3.22475	1.62946	1.99565	0.00062634	1.23468	0.97472	0.00239149	3.44719	0.00187142	0.00739659	0.00846989	1.87146	2.71688	3.66778	6.07814	2.46058
ATCOPIA20	1.68875	1.80842	0.917565	1.3934	0.303131	0.433902	1.93773	1.91282	2.64108	1.80078	1.32205	0.00419871	0.817162	0.39783	1.9696	0.705507	1.27783	1.71402	0.756239	1.39153	2.899	1.29413	2.84159	0.00145164	2.17364	2.75304	2.30016	1.98339	1.25787	1.70985	1.29135	2.20406	2.07223	3.18963	1.82146	1.28842	3.56319	1.37329	0.628702	2.14985	0.547131	3.95577	1.9812	0.723458	1.53779	0.937487	2.40699	2.29776	0.667717
ATCOPIA21	0.906502	0.94367	0.00327064	3.06187	0.00849758	0.00565842	1.84481	0.00236025	0.542219	0.00153977	0.00165184	0.00460723	0.00788675	0.00995847	1.26578	1.2702	1.21549	5.38235	1.26961	3.05833	1.87044	0.00222648	1.60411	2.73721	1.27074	0.0563242	2.94163	0.00463259	0.017167	0.00195056	1.52652	0.0166287	3.04212	5.15362	0.803449	0.00852039	1.66859	1.03032	2.7676	1.79745	1.72098	0.00262484	0.0168846	0.0339516	0.0010734	0.00918901	0.00313366	2.09254	0.00550361
ATCOPIA22	6.0114	6.05069	3.17083	4.58892	1.26058	3.25009	4.83729	0.0191534	1.74571	1.7368	1.58345	5.20314	0.0225726	0.020706	1.33208	2.52454	3.87046	3.20631	6.52353	4.19964	3.31041	1.82667	2.98654	1.32841	4.06893	0.190331	4.15447	3.09113	1.47209	1.536	1.43856	2.20583	4.27502	1.63845	0.0152108	5.29934	0.0105921	2.33714	1.92921	4.64961	1.56027	3.36939	3.38886	2.07807	0.0177145	1.38955	1.72984	3.4124	2.8284
ATCOPIA23	4.34192	4.1715	6.06352	6.10088	2.60322	1.76021	4.9738	1.49949	2.54578	7.10661	4.67928	6.77088	7.40472	1.526	1.16504	2.48945	3.15155	4.88111	3.15658	2.80361	1.38034	1.4923	1.2352	1.17249	1.34852	2.61459	0.741668	1.51627	3.6515	1.50343	7.51985	3.67993	2.99182	5.85252	3.88131	5.03926	1.2872	1.39736	2.66061	4.91975	1.69229	3.01773	2.56148	3.03799	4.95847	2.02331	5.13047	7.01307	0.660211
ATCOPIA25	1.04218	0.963852	1.54561	1.52904	0.00902681	1.59411	1.60401	0.00489259	0.00416381	1.70194	1.49002	0.00349333	0.00877937	0.00774683	0.00366645	0.00471369	0.00509033	1.55252	0.00373282	1.45277	1.61931	0.00353655	1.48448	0.00427163	1.32505	0.0635025	0.00357675	0.00514791	2.81701	0.00481805	0.00480736	0.00739535	0.00254392	0.00505391	1.53582	0.00536098	0.00424232	1.2302	0.535768	0.00386877	0.00739988	0.00265812	0.0111882	0.00645399	0.00468319	0.00389567	0.00894481	0.00540261	1.35494
ATCOPIA26	3.38609	3.47035	1.59744	1.48896	1.02881	0.0207457	1.70092	1.70589	3.43495	3.54515	0.0140637	1.59408	2.00882	1.64653	1.32586	1.24816	0.0186135	1.60277	1.65822	1.55937	3.60298	1.74735	3.16241	1.39352	2.82256	1.53383	0.029537	1.56653	1.5677	3.167	1.50195	1.35161	1.42642	1.66848	1.58867	1.82667	1.56811	1.61269	2.81503	1.70056	3.43294	1.81949	2.59816	1.32309	1.75022	1.369	1.85358	1.91924	2.1221
ATCOPIA27	6.46854	6.73154	8.77103	4.07469	3.57406	6.31305	3.1268	8.20396	6.29127	3.1816	10.5561	8.25867	3.5378	6.28411	2.91812	6.05125	7.27216	5.91669	11.4679	5.33062	9.59734	8.0014	8.9073	2.501	4.13703	5.20284	9.53906	3.32578	2.73156	7.13414	8.32864	2.68834	4.51491	5.88238	5.52678	9.68906	3.61629	6.1854	5.21299	4.59874	3.09098	4.71721	3.54249	4.55461	6.46822	7.72275	8.43033	6.94395	5.53793
ATCOPIA28	2.16021	2.02417	3.75136	2.477	5.03551	4.39355	4.28607	6.37138	5.87365	3.89629	5.42667	7.47133	7.08119	4.15603	5.69331	2.24488	1.22519	6.58743	6.70682	4.79702	4.54149	8.40343	4.29488	6.30967	3.32278	5.79429	4.21753	5.52288	3.34915	4.96093	6.27866	2.75656	5.56933	2.94128	1.94196	4.25569	10.4355	5.4314	5.91252	2.18504	5.6272	1.8025	2.89114	5.82339	5.21064	4.52191	5.80757	7.94364	3.56021
ATCOPIA3	1.02506	0.960137	1.63081	0.00134133	2.91544	5.26614	0.00395837	0	0.00122215	1.11361	0.00461904	3.74563	2.17883	3.15896	1.28339	2.04171	0.00401464	1.69259	0.00581377	0.000573697	1.92285	1.92572	1.7017	0.952298	2.29725	1.54396	0.0115366	3.18122	0.00440455	2.42204	3.46943	0.00292879	0.0129876	1.63672	0.0111567	3.73221	1.62313	1.14415	1.10034	1.70128	0.0138069	1.81976	1.65041	0.00580226	1.98531	2.3537	0.000643599	5.41318	0.00410445
ATCOPIA31	2.58849	2.74615	1.63405	0.0115921	0.0201039	0.154483	0.00825984	4.91537	3.5023	0.133233	3.347	3.63931	0.220166	0.0815315	0.144567	2.55623	2.80984	0.011632	4.99248	0.14069	1.90348	3.59952	1.69044	3.04905	1.49159	1.53377	1.38317	0.0141213	2.94131	0.00973985	1.65579	0.155913	1.77287	0.0538068	3.27868	0.00974439	3.13952	1.42955	0.0658719	0.0137382	0.011699	3.28764	1.6798	1.634	1.78773	0.14998	0.191628	5.72668	2.98684
ATCOPIA32	2.00915	1.88633	0.000801298	0.132164	1.13858	1.48563	0.123952	0.0835267	1.76858	4.00469	3.16947	0.003317	3.83648	0.0808154	0.00320257	0.00131307	0.00524649	0.0644651	1.8968	0.00227594	3.39232	0.0740992	3.09894	1.36226	1.73205	1.64239	2.79257	1.63554	1.85795	1.59112	0.0593784	1.24643	1.60243	1.65429	1.57469	1.77173	0.0023682	1.32208	0.0741074	0.085491	5.07826	3.63447	0.103674	1.25558	2.18435	1.38538	0.0705859	0.0779929	0.00385785
ATCOPIA35	6.49864	6.36237	7.3633	5.00461	7.22588	3.62444	5.4006	7.86346	4.87529	5.05342	3.70367	4.85115	6.32717	3.63302	7.03605	4.1661	4.9497	5.74586	6.61544	7.45358	8.2499	7.31887	7.49846	6.36788	6.45391	5.38217	6.78184	4.85527	7.40639	5.79347	4.27622	4.91424	4.90332	5.85638	5.03089	3.92787	5.87227	6.45411	6.74957	4.49094	5.82094	7.08448	5.18723	6.49532	7.86157	3.99185	6.9002	8.97617	4.10188
ATCOPIA36	4.6252	4.53082	10.9049	6.22378	5.93905	8.45879	8.9475	12.256	9.95347	8.90584	7.92538	9.42531	10.1959	6.74084	5.6023	6.41435	5.2481	8.17246	8.7609	4.69354	9.19246	5.41479	8.11001	5.74543	9.7065	9.49388	7.54626	8.14244	10.1524	9.77315	9.99241	6.39262	7.43366	13.0396	9.12873	11.0632	6.28091	7.15047	9.4691	8.21733	8.22212	11.0456	5.55125	5.34222	12.721	6.8028	9.45377	14.4938	5.15372
ATCOPIA4	1.81887	1.84789	2.81648	0.0131326	5.72871	1.46829	2.99993	3.17508	2.08187	1.8068	5.13613	4.03952	5.05799	4.5086	6.65528	0.384675	1.448	1.71891	2.98401	10.0643	2.12219	8.16411	1.7831	2.43484	1.38231	0.0802836	0.0128228	1.82906	3.85948	0.00425791	0.00934282	0.715455	5.77531	3.26629	3.00902	2.92602	1.75721	1.20149	4.5588	6.63263	5.78447	5.20129	1.27739	0.0512396	3.28349	0.500176	7.05146	5.67074	1.88697
ATCOPIA45	5.37293	4.95105	6.08214	4.32144	4.80493	3.47127	4.99191	5.97418	4.62388	5.36778	1.88423	6.26186	5.65832	2.51393	5.18518	3.8464	5.13913	7.489	8.32718	4.42001	8.38723	6.61479	7.41676	5.3665	5.56775	4.2786	5.0793	4.24699	4.29434	5.88909	5.61174	4.10253	4.29886	4.60296	7.6646	3.33425	5.85924	5.80679	4.86512	3.13424	4.40148	10.8978	8.31664	4.25794	6.67857	5.5214	6.13379	9.21765	6.47763
ATCOPIA47	1.13738	1.06048	1.64735	1.54631	1.11129	1.68598	1.81064	1.81024	1.77608	1.81827	1.55814	1.97758	2.26105	0.00129091	1.41458	1.2622	1.25705	1.56133	0.00105581	1.59394	1.86943	0.00208104	1.55307	1.3944	1.33588	0.0609058	0.00338057	0.00606444	1.48899	1.55436	1.44849	1.06787	1.53805	1.80519	1.68197	1.94179	0	1.2955	1.51059	1.69575	1.70538	1.7401	1.12613	0.00198523	1.56231	1.40359	0.00285177	2.08481	0.0026287
ATCOPIA48	5.5802	5.44483	3.96938	2.87921	3.64002	5.07122	5.31651	5.21825	5.22963	3.22692	5.28149	4.23274	5.09392	5.01264	5.02939	4.15766	3.42766	2.88239	6.39073	4.90491	3.38125	5.33054	3.14147	4.64566	2.74249	2.76444	2.78171	2.98905	4.65634	4.59331	4.63079	3.40118	3.84872	4.24153	5.29542	5.66935	3.00579	2.71337	4.41852	3.01289	3.07933	3.69661	3.70269	2.49126	3.45619	2.83583	3.37464	10.2296	3.56656
ATCOPIA49	8.72962	8.69787	8.58232	11.7303	6.31215	7.73297	9.55147	7.64307	3.47246	12.0601	5.14427	13.0595	15.2124	8.82149	7.08288	5.39978	5.05795	9.8728	7.07855	9.88237	5.82243	7.91044	5.37166	7.96313	6.29878	9.76264	8.24514	8.76372	5.9028	11.288	6.87897	9.00641	4.63416	5.10332	7.70586	12.7208	7.55504	8.03228	8.24053	13.1774	8.40522	13.1091	8.13663	7.9117	11.4768	3.83702	6.46742	8.70593	5.54578
ATCOPIA52	1.05097	0.956645	3.05747	2.83808	0.0104193	0.00602901	4.53491	1.56718	1.52449	1.56119	0.00409948	1.63678	0.00814199	1.36168	0.0150567	0.00547013	1.2298	0.00759653	3.10924	2.80047	0.00255662	0.00437177	0.0028413	1.32299	2.45065	1.52009	1.30981	0.00909074	1.40708	0.00386347	1.38637	2.19985	0.00309548	5.7805	0.0048515	1.65247	2.86025	0.00677158	1.01006	1.52442	1.57255	3.20455	0.00958217	0.0126881	0.00518122	3.81138	1.66971	0.00578449	1.38119
ATCOPIA55	1.03532	1.02639	0	1.06224	0.0352866	0.0129432	0.0439283	0	1.68625	0.046939	0.0258017	0.0166506	0.0772691	0.0366714	0.0291064	1.17655	0.000444307	0.0166106	0.00309754	0.0227058	0.00874625	0.00788302	0.00977506	0.0126809	0.971623	1.48092	1.45854	0.0227335	0.00737416	0	0.000350483	0.184756	1.51079	0.00192041	1.04253	0.000906211	0	0.175739	0.0896404	2.59442	0.00220352	1.79256	0.0932532	0.338571	0.0109623	1.33114	0.000556325	0.000546822	0.0145206
ATCOPIA56	3.18584	3.24961	1.29426	2.51737	2.09993	3.30128	1.28343	0.00376462	1.66357	1.5328	4.44023	4.47644	1.93146	1.66327	1.44345	4.7753	0.010973	2.55235	1.76064	1.05134	2.66412	2.71229	2.46113	0.162212	2.47272	1.11618	3.80584	3.14277	1.46002	1.6555	3.01138	1.19909	2.59107	1.58695	0.174816	1.76855	3.22913	2.36722	3.31953	2.54033	3.24307	1.68043	1.33658	1.47217	0.00504611	2.31676	0.00387428	0.00603253	2.34469
ATCOPIA57	6.43618	6.21056	11.5833	6.39573	4.4376	9.15024	10.8755	7.24433	11.6314	4.86609	7.89529	10.6039	8.51708	3.18662	6.35452	5.84995	5.2837	8.24566	8.90128	5.47465	8.41885	8.08353	8.01201	4.34258	7.71214	5.93603	10.5098	6.51494	7.18458	4.87204	9.43931	5.9007	7.65849	10.348	6.9915	8.4735	9.37955	7.89375	5.80966	8.97921	4.73442	1.75993	7.006	7.67975	8.46807	6.43222	5.03533	1.88682	3.64051
ATCOPIA58	3.45269	3.30901	3.17014	2.7797	3.37218	4.8445	4.23337	4.41114	5.49237	4.92016	2.88005	4.46711	0.723577	6.5496	4.05084	5.36249	3.53136	6.94762	1.72651	3.9592	5.21598	5.89858	4.79346	6.39999	5.65497	4.76502	5.08219	6.22518	4.19016	5.42245	4.96392	3.96978	5.33584	2.93993	4.52638	3.47898	4.29797	3.97575	5.9809	5.26668	4.42702	3.30784	2.7085	2.6359	3.64731	4.68112	3.44913	6.44525	3.98757
ATCOPIA63	1.10699	1.06517	1.57772	2.95902	2.29022	1.56691	1.69732	3.54096	0.00967838	3.25778	1.62362	1.5748	3.61916	0.00994406	2.56877	0.158396	0.0168448	3.00285	1.44656	2.98992	0.00823301	0.000813183	0.00553807	2.6983	2.81643	3.3028	1.52588	0.0059845	1.40058	0.00493083	0.00535418	1.51737	2.92637	1.60157	1.62493	1.62513	3.1153	1.31237	2.05178	1.56978	1.6198	1.65618	3.99829	2.45186	3.4967	0.00711089	0.00818963	2.02156	0.0139774
ATCOPIA65	3.27893	3.30563	1.40019	1.45438	1.57918	1.63845	1.8638	3.43723	3.15674	5.24075	1.52934	2.12427	2.08647	1.11507	5.68672	1.70772	1.33554	1.65775	4.54885	1.7076	3.16272	0.817056	2.82657	0.247931	2.856	3.04377	3.89472	1.46553	1.54599	0.218488	1.38465	1.68338	1.7055	1.51337	0.449077	4.82318	1.05489	3.105	3.78845	4.56395	2.53733	3.63462	1.53036	4.38649	2.38243	1.4712	2.55418	1.93949	2.82048
ATCOPIA67	1.84874	1.90116	2.86123	2.86319	2.09777	2.91695	3.08801	2.97556	3.11169	3.33865	3.14012	3.36816	3.56649	3.01197	2.57603	2.42514	2.50326	2.87112	2.81732	2.7124	3.2306	3.03182	3.07014	2.62258	2.68896	2.8295	2.58869	2.87493	2.71807	2.81961	2.60643	2.33646	2.9633	2.69265	2.80707	3.03533	2.81513	2.53875	2.87368	3.2222	3.25071	3.09847	2.57323	1.31423	3.08871	2.5373	3.14647	3.45967	2.58653
ATCOPIA69	5.12844	4.98346	3.87235	1.85073	1.92173	7.04636	3.00515	4.36373	1.64278	6.43166	2.83863	4.67888	9.62531	3.77929	6.51342	6.13977	4.68735	4.39308	4.79075	4.90723	4.71487	6.2651	4.30809	5.16751	3.00411	4.33813	6.56104	4.41332	5.05563	2.33058	3.39405	5.01768	6.42426	2.8747	2.67896	1.24149	4.39945	2.51677	3.5136	3.97109	4.60055	4.70291	2.93678	5.25235	6.36925	5.30925	5.86372	3.26678	6.58967
ATCOPIA72	1.109	1.06269	2.58	0.00756339	1.32316	1.55845	0.282434	0.00754372	0.00555047	0.00711219	1.51184	1.67592	0.0100608	1.55774	1.32249	0.0999931	0.0105438	0.00528205	3.50288	1.40203	0.00564318	0.00504878	0.00665887	0.00908952	0.0228527	0.00363254	1.24976	2.89941	2.86316	2.88566	0.00568857	2.47468	1.41523	1.60417	0.00836224	0.00337817	0.00283885	0.0056758	1.47564	0.00870812	1.50478	0.00407065	0.00709439	0.0350711	0.00689733	0.0135729	1.69212	0.00658146	1.37962
ATCOPIA74	1.08252	1.06453	5.22429	0.000512998	0.0120458	1.15765	0.00163804	1.64986	2.77289	1.56141	0	0.00287349	0.000362596	1.51223	0.00136078	2.31936	0.00482525	1.46952	1.59382	0	0	0.00100777	0.0026639	0	3.89417	1.49801	0.00341599	0.00134095	1.49522	0	1.48043	2.37943	0	0.00459635	0.00751818	0	1.17551	0.0021944	0.0012695	0	2.64972	0	1.21685	0.00373521	0.00164143	2.16112	1.71161	1.37489	2.72614
ATCOPIA75	5.60835	5.5601	8.20377	7.21996	5.85243	7.99998	9.85093	6.20352	7.40262	8.10518	7.7288	8.19278	10.39	9.28896	10.289	7.49233	5.20804	10.4866	6.45712	8.71045	7.59533	6.67644	7.03765	9.16549	9.14918	7.29058	6.88705	10.6007	7.13193	5.76925	5.63775	7.91537	8.72224	7.51418	7.70855	8.40701	5.7762	4.54241	8.18829	9.15487	7.52882	9.80394	5.45546	7.87974	6.73962	5.09768	8.57189	7.12039	6.69506
ATCOPIA78	12.9024	13.7955	6.00169	5.29655	3.37724	3.42917	5.37845	22.8947	9.17036	3.15034	5.52582	6.14176	5.50849	1.68526	6.97605	7.34458	9.07842	9.22518	9.84671	4.43399	4.46249	5.33143	4.20425	4.49462	6.60176	8.37326	7.18271	9.13063	6.24201	8.19178	5.63111	5.05813	4.49272	8.1217	3.38906	4.72444	12.2051	6.66636	5.40917	6.81842	6.2866	6.4972	4.10252	4.34051	8.81694	4.02018	6.50876	17.3619	2.37164
ATCOPIA79	2.17731	2.08467	1.90333	3.10409	2.48273	3.8546	3.62086	1.88058	2.19764	3.58417	3.40514	2.07171	2.85966	3.62314	2.95004	2.58409	2.51491	3.45225	3.37844	1.61985	1.60575	3.69546	1.48509	2.78164	3.08392	3.37987	1.67477	3.29976	1.64973	3.59358	3.01602	2.68412	3.43428	3.3019	3.4485	2.14071	3.24678	2.88467	2.66507	3.24208	2.01186	3.65542	1.65329	0.328517	1.79293	2.68887	3.79451	3.74616	1.63896
ATCOPIA85	1.1064	1.03979	1.57716	0.00599097	0.00579673	0.786545	2.40064	0.016342	0.00637036	0.790987	0.769839	1.69768	0.829727	2.88658	0.00833346	0.00764209	0.574137	0.00838148	0.00592816	0.00552156	0.00323478	3.3656	0.00444122	0.0124111	0.0294639	0.00627264	0.0059898	0.70204	0.0148367	1.52162	3.099	0.0106057	1.56521	0.00727622	0.0083525	0.00376048	0.00429529	0.00902407	1.99384	3.13062	0.00712101	0.00597009	0.00730032	0.569048	0.00596408	1.34376	0.00633906	0.00507125	0.00594749
ATCOPIA89	3.04521	2.99913	1.67043	1.50271	2.2926	3.3406	1.56249	1.65571	1.39886	3.36444	3.17581	1.75706	3.35912	1.41304	2.22453	2.14724	2.54589	2.70798	1.38076	4.09778	3.44773	3.48776	3.08808	1.37631	3.97039	1.56618	2.3737	1.47707	2.94134	2.57969	2.86122	3.60218	2.99876	1.36895	4.27016	5.34443	3.11335	1.30059	3.27585	3.16586	1.61375	2.95334	3.48854	3.77447	3.09946	2.3338	4.73065	3.7004	3.95599
ATCOPIA8A	1.10263	1.09699	0.0704758	0.0497463	0.0831114	0.0632501	0.0563773	1.39951	1.65795	0.0797766	0.0810819	0.0788133	0.0837944	0.0774111	0.0833673	0.067662	0.0767024	1.4867	0.0929056	1.2811	1.66018	1.67001	1.61745	0.0892987	0.0934219	0.0914854	1.42113	0.0978654	1.48614	1.53727	1.34262	1.3562	0.091432	1.37577	1.40243	0.088164	0	0.11288	0.583824	0.0468026	0.083142	0.000431513	1.09236	1.08616	1.60691	0.0481274	0.000515161	0.0033259	1.32152
ATCOPIA8B	2.20965	2.17906	1.56049	1.50765	0.0658088	2.86326	1.64488	1.13117	0.000804835	0	1.56228	1.80257	0.00424376	0.000945537	1.4021	1.99877	2.1449	0.000925208	2.04081	0.0604749	1.72439	0.00260787	1.53109	1.37137	2.67971	0.104086	0	1.53527	0	0	2.36831	0.0518568	2.53187	1.12551	0.00276364	0.00117002	1.1526	0.00366559	0.00145612	0	0.546201	1.71944	0.00243684	0.00322391	0.00120285	2.18003	1.23903	2.00314	1.44546
ATCOPIA90	1.15127	1.09252	1.56378	1.55908	1.16756	1.60384	1.59028	2.7402	0.0680919	1.66254	1.58643	1.65206	3.28639	0.00310287	1.39437	1.28188	1.33952	1.63731	2.95211	1.3603	1.62491	1.72393	1.46129	0.0444961	1.42192	1.50364	1.43665	1.60398	2.73304	1.42389	1.56458	1.28528	1.54729	1.60932	1.64138	1.84175	1.43746	1.25019	1.4877	1.53637	1.53126	1.68671	1.41948	0.117328	1.72235	1.47229	1.67483	4.66768	1.40664
ATCOPIA93	4.62515	4.60489	1.99867	5.62376	6.67884	8.05681	9.42532	6.23106	7.7997	11.7008	3.23038	8.62514	6.98516	11.4189	7.61118	2.78865	7.48636	7.76089	4.73083	4.42068	12.3914	9.9583	11.6076	12.2529	4.70362	7.9909	11.7531	9.01218	10.012	5.95479	5.8943	4.93514	5.57938	4.43446	4.75612	9.39806	4.61335	8.71218	7.37111	11.2137	8.67127	8.69093	12.5375	3.98412	8.67498	2.88017	5.43954	10.9064	3.38394
ATCOPIA97	2.223	2.0402	1.4625	1.43014	2.24751	3.36274	1.56273	1.77942	1.50536	1.47449	1.31221	3.16169	3.4057	4.24456	1.30286	1.2318	3.35218	1.31557	1.50951	2.80482	4.91946	1.48957	4.51002	2.80114	1.35345	1.3203	1.28512	1.39293	2.8714	2.74392	2.79596	2.31807	2.68076	1.32606	1.45957	3.28982	2.90026	1.17809	2.43934	2.91262	3.05684	3.44754	2.76738	2.36908	3.44683	2.4921	3.55988	1.84208	1.22344
ATDNA12T3A	6.02369	6.09659	6.78159	3.97333	3.68508	6.1399	3.84052	5.20788	7.20515	4.38339	4.76577	5.8817	5.19334	3.97474	3.90838	5.49225	2.65488	6.74594	5.81526	7.73041	7.10557	7.76874	6.7744	3.60559	3.65125	2.53625	6.1666	3.9151	6.5938	5.10818	5.67989	3.15375	6.9445	2.81104	5.55936	5.10417	3.8558	5.6883	3.61054	3.7746	5.55883	5.34725	3.47207	4.7248	6.5452	7.08716	2.65729	5.33341	5.40111
ATDNA1T9A	4.20764	4.4008	2.72516	0.588128	1.99452	2.36643	1.98103	4.34126	3.59017	3.92229	2.64752	3.80941	3.80824	3.72947	4.08125	3.90212	5.21831	5.04168	2.47375	4.70398	4.87068	3.71937	4.44678	4.05832	2.60836	3.81057	2.55456	2.58961	3.33393	2.25205	5.07395	4.08361	3.79785	3.97955	5.46437	2.52318	3.62477	2.55884	2.59311	2.85665	2.46073	3.80258	4.08084	5.47911	3.7034	3.89071	3.84921	4.44334	3.88436
ATDNA2T9A	10.3878	10.8968	10.5089	9.65013	9.07708	9.56426	7.74879	12.9596	8.42717	7.23182	8.1005	7.39772	5.23094	8.07398	11.7953	11.6559	13.9698	8.65631	9.05498	10.7247	9.49433	7.8442	11.1253	9.60854	10.3039	12.957	10.3227	9.66475	7.15811	10.0602	11.5106	16.0242	11.6596	9.36671	14.2529	7.10807	13.9152	14.132	11.7574	6.34937	8.30662	6.49884	9.80733	10.6051	8.09927	11.0894	10.8386	10.0034	12.7635
ATDNA2T9B	8.97961	10.05	9.64773	8.45211	7.76116	6.18526	5.9634	5.61794	4.30112	6.74561	7.14308	7.86735	5.02116	8.23642	10.6705	9.09988	8.86597	6.01651	6.08097	6.44552	7.828	7.42234	9.10496	6.78755	8.60667	13.1164	10.6563	8.72076	5.9669	10.4469	7.50404	9.94561	7.08076	8.23708	10.38	5.04614	6.55943	9.89963	8.23744	8.00886	7.90661	7.22638	9.25185	11.4401	7.58992	10.2789	7.14081	5.60489	6.40549
ATDNA2T9C	18.6418	18.3372	15.7841	15.572	19.1549	11.7623	14.0408	12.7313	11.5652	10.4977	13.8225	10.929	11.8354	15.8967	17.4498	17.5745	15.6153	14.5004	12.4959	14.3786	11.1679	11.7213	13.4668	18.4414	17.0803	17.4938	16.5116	12.3359	14.4176	15.0751	15.4151	18.8666	13.6897	12.7949	11.4817	10.597	14.8821	20.1275	15.0724	13.2887	15.4657	10.8462	20.5537	21.5452	12.8516	18.354	11.4011	9.98755	16.2597
ATDNAI26T9	5.69886	6.00052	2.60145	5.41267	4.07901	5.08591	5.19262	7.39988	4.83945	3.75119	5.8982	4.30264	7.64706	3.68806	6.63877	4.30021	2.8427	5.2008	5.83361	8.22706	3.72863	5.18683	3.0955	8.24255	5.26517	5.09535	3.56363	6.90569	4.22834	4.71569	5.24736	3.85032	5.02785	6.7016	2.87068	4.93945	4.36257	6.2056	4.029	1.18964	4.56552	4.90819	4.92545	4.88538	6.09475	4.0573	4.8971	2.5661	6.3428
ATDNAI27T9B	7.73596	7.8042	6.8358	6.10866	3.82344	5.54115	7.28121	7.45413	3.22855	9.71598	5.83691	5.31449	6.17133	5.20324	8.62553	8.46299	9.33508	6.04103	5.74457	9.9259	7.35398	5.43743	7.07102	9.49089	10.9106	7.08692	4.34927	5.75477	8.11429	6.05822	9.60569	10.0298	11.0791	6.38106	1.47834	5.79344	5.41606	6.82166	8.61066	7.29969	4.89699	5.5754	6.83787	3.1021	9.86988	9.12016	10.0466	9.75303	13.216
ATDNAI27T9C	6.28958	5.95996	5.23455	6.867	5.71874	5.78247	5.37851	4.80697	5.32773	7.47752	5.11282	5.83383	8.0088	4.43881	10.5373	6.07793	7.36194	9.13631	5.48248	3.88398	6.82182	4.58863	7.10272	6.9635	6.94924	6.626	6.78077	9.78999	3.64975	4.70434	6.64502	7.25517	4.31137	8.23579	6.17703	5.12967	4.23333	6.90801	5.6168	5.13921	5.83232	4.6341	12.0413	5.801	5.73157	5.85684	6.84153	5.20217	5.46964
ATENSPM1	7.1683	7.25276	7.83367	8.99798	8.2374	7.25522	4.83996	6.74735	7.83194	7.17675	9.2089	9.9163	5.97763	9.05926	7.48841	7.66593	7.4692	9.59152	8.26223	8.34704	7.28762	7.70673	7.13027	7.895	8.21404	7.59422	7.92946	8.27914	10.1201	9.48849	8.42072	7.38698	6.7757	5.27222	8.64126	7.02833	4.752	5.15472	6.93882	7.02716	9.11824	6.96371	4.51161	8.41335	4.97208	6.11784	9.92004	6.97181	8.2149
ATENSPM11	7.93048	7.50179	9.90066	8.33667	7.14352	8.05486	10.4651	9.88246	8.92086	10.9135	10.1945	7.61328	13.446	6.07502	6.37882	10.353	9.33797	10.9754	7.56728	8.43925	8.30888	10.3901	7.66953	7.53298	8.29144	6.93393	10.1184	8.37519	11.2138	9.03147	9.80362	7.95897	9.4487	8.30195	8.43833	10.6138	10.7835	10.1475	7.78289	8.4873	6.89257	10.5751	8.026	7.50543	7.48132	7.90108	7.91926	12.8066	9.13534
ATENSPM1A	9.41628	9.7254	14.1239	10.468	10.0893	17.1157	11.4367	12.3757	20.4292	11.3789	17.1593	18.3919	15.7243	13.6164	15.7041	11.2102	16.4912	10.8814	19.0919	17.4829	19.8859	12.5081	18.6744	15.3152	17.5768	17.8336	18.4801	17.1867	19.0369	12.7573	9.77237	10.9262	9.696	16.0808	14.1615	13.9959	17.4846	9.5471	14.4584	11.9312	16.7483	10.8165	9.05696	7.74837	23.795	17.6645	15.1942	9.47908	15.3422
ATENSPM2	9.62857	9.88351	11.0719	13.6249	9.20767	15.6532	12.023	12.8986	18.8855	13.6268	15.9742	11.1462	14.9342	10.8186	9.41389	13.7273	12.3974	16.5099	13.1432	18.1241	13.7929	13.518	13.0981	9.68243	16.7339	15.0479	12.2989	16.0709	13.8632	13.8818	15.2533	10.856	14.5046	13.0327	16.4723	14.6037	17.4724	9.71607	13.5262	17.4533	11.309	20.0013	11.4197	11.2691	17.2463	12.6263	16.8682	13.1341	13.6553
ATENSPM3	12.0619	11.7486	10.9669	14.9123	8.64331	12.3469	13.1721	12.8433	11.8782	18.536	13.7262	13.4379	14.1994	11.6504	11.089	10.4672	11.2708	16.2546	15.1161	9.5798	10.8926	10.9155	10.0075	11.404	11.61	11.1563	10.1944	10.4849	10.6889	10.8379	13.2373	10.5544	12.6737	11.9207	12.7236	16.1648	8.64535	9.83831	10.0856	11.2035	10.5613	11.3697	10.5386	11.0539	10.188	10.7353	10.8983	13.3807	10.8654
ATENSPM4	7.70734	7.85608	8.84092	9.42619	6.72164	8.57917	10.6948	8.17902	10.1148	13.492	8.21617	12.8425	8.7763	8.63888	8.44564	8.00339	9.23536	9.29168	8.74832	9.99488	10.0658	7.89128	9.89219	9.76935	9.70629	8.8035	7.90536	9.26301	7.85062	9.96893	9.8389	11.9281	11.257	9.87444	9.35966	9.90214	7.94882	6.7556	8.83253	9.42177	9.18485	10.0557	9.38712	7.76805	8.67928	8.37294	12.813	10.9841	8.38035
ATENSPM5	19.7255	20.8845	27.8027	28.9408	23.1789	27.1275	26.9876	23.5691	29.2792	19.9358	30.5872	32.5783	35.8625	23.1097	21.4647	20.5778	22.8802	20.9498	21.2996	28.4295	27.0005	35.3089	24.9056	19.9684	24.6612	25.5158	28.9422	30.5546	30.9819	36.0171	17.1879	21.8175	25.8525	22.245	23.3793	28.1622	27.758	27.0149	25.1739	34.7481	24.0278	30.988	22.5125	13.2483	35.1665	28.8426	25.8734	26.961	26.0307
ATENSPM9	8.38121	8.36466	15.1126	13.9617	10.6687	14.4492	15.3081	20.1478	16.4462	16.6558	15.5795	12.4697	15.3028	14.847	16.2656	11.3548	16.2658	12.0687	13.768	11.8531	19.6394	11.6764	18.6746	15.7921	13.6934	11.9651	14.1618	14.4926	13.7151	10.401	13.6665	13.5182	12.1261	11.6517	17.7366	16.8244	12.4625	15.1679	17.2416	18.0645	10.6636	18.4037	14.0202	10.6681	13.6996	11.9214	17.6416	17.4075	11.4696
ATGP1	36.7822	40.6296	44.411	44.6807	31.4995	56.9193	54.0851	42.9399	43.3567	48.6221	53.8604	63.4883	66.9208	50.9511	33.1769	35.6882	36.7291	50.0246	47.425	41.5302	53.8043	57.1159	50.5199	41.4997	41.0838	40.7496	33.621	44.6006	43.8712	51.7761	39.6212	31.1627	43.8147	43.4115	40.1755	56.3243	49.1829	31.5792	45.6038	45.0657	50.2129	53.8335	26.9094	26.4418	52.4141	40.528	42.9468	46.0776	42.9142
ATGP2	16.5004	19.4478	26.1811	28.3255	19.2396	46.2954	27.4981	29.0975	85.581	33.9589	32.3476	29.1656	28.4017	24.6554	22.0103	20.6906	22.5154	32.4787	42.9464	47.0753	31.6987	56.177	30.1725	19.8617	34.5815	34.6934	32.3924	33.9228	32.1516	27.1539	24.6475	18.4601	22.3588	28.5563	32.309	49.5167	36.0207	19.5963	29.6507	25.7711	23.0743	65.2516	24.6255	18.1769	46.7337	18.2079	58.8175	25.5786	23.6533
ATGP3	21.3568	21.1197	20.7253	17.5069	17.4026	26.3964	22.6876	19.8481	23.9857	22.3956	29.9215	23.663	32.7116	18.3514	24.3814	17.519	18.0992	17.6231	23.8348	19.1663	24.2835	22.4886	22.0387	19.1018	23.6062	18.2134	26.7224	19.8367	21.365	22.2264	21.0399	15.5081	19.1653	24.6145	20.3004	30.2827	21.3867	17.8007	20.9472	19.4854	20.2517	23.8783	15.5168	15.6321	28.1843	17.8675	30.9761	23.0438	17.0574
ATGP9B	2.4635	2.82621	3.44105	4.34379	5.29423	2.38293	6.92218	2.11606	4.06775	3.18483	3.15601	3.41971	2.03845	1.22185	0.923852	5.80909	2.2005	7.5949	1.5435	6.83874	3.00236	3.56067	2.83512	6.55582	5.22758	3.08622	1.53104	6.88344	8.99621	2.63489	3.26651	3.62774	7.24373	7.02508	1.25075	4.50889	1.57514	2.71598	3.33692	6.42022	3.78321	1.80423	6.09093	1.89487	2.39714	6.84925	1.71493	3.48113	4.13232
ATHAT3	5.34686	5.03819	8.26732	6.48085	4.2236	7.14006	7.89626	5.61679	6.64117	8.01563	8.39957	5.9201	10.7293	7.47635	3.96607	7.4163	2.81084	8.43228	8.45511	4.25391	8.1438	8.16113	7.35741	5.75442	7.35442	5.03051	7.54459	4.50076	11.1988	5.47991	5.19811	5.54637	7.88061	8.51289	7.14121	7.97625	5.17234	6.90375	5.70388	6.25386	8.18324	9.76369	8.5929	5.67899	4.50978	5.34413	7.05139	7.45136	6.62452
ATHAT7	6.24989	6.02757	8.67419	9.79569	6.08302	9.2096	9.04021	7.69768	8.20889	7.82826	9.35475	7.39966	10.4937	8.65338	6.78529	6.4443	7.65494	7.63315	8.95688	7.01109	9.81994	9.15363	9.04976	6.05714	8.14257	8.7504	6.38131	8.52143	7.03732	8.00743	7.75407	8.07123	8.78995	8.47974	8.91044	7.43856	8.69933	8.89819	8.401	9.97415	8.97927	12.2317	7.30646	8.00602	9.1872	7.38004	8.98509	9.97275	7.78677
ATHATN10	21.9342	20.6242	17.3333	15.3521	21.0615	12.5312	15.39	14.6636	11.6302	11.348	14.016	13.6581	10.8929	15.1232	17.5833	22.8642	19.8174	15.5858	13.2687	16.7777	14.0902	13.2358	16.0723	20.0424	16.7098	17.7627	16.2214	16.4287	15.213	17.2631	15.6416	18.8615	20.5579	16.0889	12.696	11.755	13.4398	17.224	17.0243	14.1612	15.4804	12.3206	18.8318	18.0733	13.3206	19.3804	13.2542	11.4428	17.1245
ATHATN6	11.1794	11.5437	7.16782	13.5817	9.03816	5.50895	8.88805	8.05917	7.97463	7.04941	7.28855	11.4247	9.81607	10.0039	12.1568	13.4581	12.6868	9.74572	10.0624	9.45298	7.33174	7.50726	8.19527	8.33785	12.5119	7.43033	11.4598	13.0235	10.2592	10.6428	9.4146	10.7411	9.27116	9.01884	11.827	6.69258	8.49365	10.4419	9.64503	9.58475	10.3732	9.17402	8.30834	7.35837	8.46912	8.46598	7.41378	7.01672	12.766
ATHPOGON3	55.2566	50.4945	33.5839	34.2606	56.3046	26.7114	27.4113	38.7617	24.6248	24.1861	24.2993	22.9233	24.0698	36.9968	47.5328	48.5014	49.8842	31.0332	23.8911	34.184	25.7533	24.478	34.9006	44.8679	47.2506	39.6416	37.6836	38.7282	35.712	34.5303	35.3224	51.4369	34.9467	36.7137	37.9591	23.4774	39.2167	47.9883	38.4069	33.3423	33.0633	25.8816	49.5869	51.7831	23.5968	45.2864	28.0785	24.773	41.1439
ATIS112A	13.7408	13.262	13.9431	14.9736	9.15891	9.85955	10.2728	10.7401	12.0817	16.7937	14.6042	9.52065	16.952	12.942	11.0463	11.4231	12.4467	12.5385	13.5664	9.72107	14.0112	12.9208	12.6925	13.1778	12.8871	12.9541	13.527	13.6902	9.85459	9.47293	16.2849	14.0086	12.0609	10.8291	15.7462	16.3488	10.252	11.363	13.3586	14.4749	9.47952	10.113	12.3106	7.56843	14.7077	12.9485	17.0426	12.1519	11.0539
ATLANTYS1	18.4171	20.8357	29.2622	29.701	20.5755	33.0495	33.0849	28.996	33.0611	29.8628	26.6279	29.0304	30.9142	25.4276	25.0308	23.6165	24.8845	34.5485	29.7953	29.7403	29.4867	32.4208	28.6769	21.3792	26.4915	27.2427	22.1103	25.1445	29.5929	30.6093	25.2551	23.6886	32.1005	31.1533	24.0261	31.0552	29.8157	18.1241	26.2609	32.4502	29.5924	31.5593	18.8396	15.9023	26.9256	24.0681	26.5672	32.548	28.1847
ATLANTYS2	20.2318	23.3112	31.7818	24.6967	19.8948	35.6533	26.1906	26.9571	40.1791	25.8788	31.3672	29.7568	32.5929	28.9751	21.735	20.7345	24.2022	30.5593	39.4523	28.3332	27.6504	32.3848	27.3255	25.9571	23.9074	29.2454	28.4457	27.1265	29.0922	22.6894	32.807	21.7078	26.8577	26.1461	25.7235	27.2412	40.8228	25.396	22.076	25.5601	31.7442	31.2645	22.8783	21.079	33.5222	24.687	33.4152	30.4362	25.7333
ATLINE1_1	7.01517	7.42049	8.09269	7.72946	4.85789	10.0387	10.8244	9.94278	10.7604	7.30825	10.5869	7.97261	12.2876	10.6587	8.69365	6.79166	8.49247	10.1091	10.1414	9.11223	6.03565	9.469	5.57524	8.91448	7.22184	6.51417	4.70601	9.11725	9.04446	8.96758	8.71552	5.27869	8.25983	10.5608	7.84593	9.8725	9.06772	5.60298	7.25881	6.79753	8.99446	8.86223	5.10121	5.76831	9.72228	8.31042	9.58571	11.8856	6.33092
ATLINE1_2	6.07677	6.38547	5.58937	4.80655	4.07097	5.70353	5.10202	5.21096	7.15638	6.49093	5.31951	7.72355	9.25147	7.33518	5.84616	4.4431	4.28533	7.33013	5.89533	5.88653	6.81315	6.10633	6.49339	5.03914	6.47482	6.38952	7.2673	5.52274	7.24983	8.9392	4.79738	5.22151	6.14199	6.81284	7.40921	6.24306	6.06124	4.01302	5.19061	4.75769	5.65981	8.04594	4.00414	4.07249	5.59439	4.89099	6.70803	6.13512	4.47946
ATLINE1_5	1.58528	1.74291	2.58214	2.58968	2.15271	2.39117	1.32549	2.66804	1.32341	2.7579	2.4552	1.49186	1.4496	2.80374	2.43579	2.30212	2.37069	2.67681	2.8369	2.47938	1.34876	3.23095	1.33518	1.18089	2.52408	2.57758	2.45949	2.70894	2.45733	2.29049	2.45855	2.35265	2.53771	2.79851	2.71846	2.65006	2.51261	2.41455	2.46851	2.66656	1.40173	2.77982	1.18914	2.38875	2.85018	2.62455	2.65052	2.72395	2.42706
ATLINE1A	34.4772	34.1463	34.5306	34.6641	31.7749	35.6676	35.6892	37.9811	32.8586	33.2788	38.3673	36.94	38.1832	38.6339	38.1196	29.858	34.2353	34.7067	35.9002	35.3367	33.5154	34.7948	32.5823	35.021	36.8908	34.704	39.599	35.0085	37.5143	30.4578	34.6624	37.6508	32.0175	36.6213	39.7527	35.3708	34.9431	33.6289	37.5053	32.6587	38.6766	38.2208	31.9908	40.392	33.2252	42.012	39.7239	36.1533	31.6727
ATLINE2	11.0171	10.9609	15.9021	12.1266	10.263	13.3346	14.4616	12.0607	12.0036	13.1538	12.6887	17.5738	14.0962	14.3101	11.6246	11.6476	11.1037	13.1438	11.9236	12.5776	12.2603	14.2628	10.9162	10.9471	14.4641	12.2059	16.1157	9.63612	14.0153	13.6684	13.9683	12.0975	11.5688	11.8364	11.5642	12.0725	11.4529	14.8324	15.7151	12.3875	13.7162	12.7519	9.2719	11.1925	16.0895	13.187	14.8673	12.055	11.0171
ATLINEIII	23.7705	23.8033	27.6207	22.9624	18.6052	24.633	25.0856	20.284	29.7439	26.5916	24.3849	22.3091	32.129	26.4817	23.4979	24.6385	26.0097	18.3332	21.6422	20.9221	25.7105	22.3941	23.7141	28.0062	23.8682	21.9624	18.5643	24.9354	24.2848	21.761	22.4083	21.3154	22.3246	23.8215	27.6559	26.8856	20.5091	25.7467	20.7757	22.3436	28.4197	27.0027	25.0145	17.643	24.3171	20.0315	26.1594	20.0915	21.8586
ATMU1	3.0724	3.05102	4.84609	1.70975	2.78959	4.65752	4.86107	3.00842	4.92376	4.85185	1.46513	5.074	7.025	3.0417	4.08075	4.8097	2.49074	4.24148	1.65603	4.06307	5.19191	5.23955	4.67891	3.13242	3.83807	4.08924	6.71197	4.63206	4.25238	4.77028	4.59032	4.08888	4.11788	3.03389	4.39927	3.29795	3.36745	2.55784	5.55009	1.4638	4.88858	3.20368	3.14184	3.57347	3.17652	1.30848	6.31199	5.34417	6.50351
ATMU10	2.06141	1.98232	2.94585	1.53243	1.12924	1.79669	1.6958	0.00324321	3.15204	3.25409	0.00593819	3.52603	3.93039	3.19592	1.33468	0.0821034	1.28835	3.03542	3.38809	3.03219	1.79189	3.58082	1.54628	0.00548637	1.39262	1.45987	1.29682	3.01383	1.5351	2.89526	1.37742	2.53276	2.83634	1.5742	3.06784	3.57261	0.00265326	1.30482	2.3795	1.62228	1.55065	1.63832	2.40353	0.874647	1.72544	0.0100888	1.68086	0.00437396	2.79681
ATMU2	2.07312	1.96535	1.13733	1.4538	0.949248	0.0170738	1.53962	3.00688	1.58947	1.68663	1.73735	1.23853	1.14583	3.17907	0.991877	1.47529	1.2752	1.63272	1.34291	2.97792	1.57885	1.70758	1.38256	1.32346	1.41384	1.4685	1.18809	1.50183	1.46032	1.17256	1.04547	1.15568	1.58715	1.57485	1.97553	3.47072	2.88453	1.35601	3.01346	1.46089	1.82561	1.82048	1.11715	0.0467964	1.52076	1.23926	1.6437	2.42343	1.40006
ATMU3	3.29916	3.17753	4.42015	5.68211	3.49281	4.58136	6.16186	3.27885	3.23803	4.87156	5.69717	6.25003	6.08414	5.4759	2.77567	5.8927	2.66297	3.01229	6.39421	6.34217	2.90754	2.14379	2.85391	5.36805	4.11195	3.61527	4.20277	5.79047	4.23148	4.40655	4.08248	3.90768	4.07959	2.98018	4.50841	5.11259	2.90595	3.94485	5.43484	5.58865	4.20504	4.39429	4.74519	2.86182	5.00206	4.78843	3.15174	3.20215	5.15367
ATMU3N1	9.02178	9.11449	11.1889	9.89084	10.3333	8.63939	12.1497	10.567	10.3939	8.13357	11.9791	11.6047	9.88288	11.3053	9.89847	11.405	13.6617	9.72758	10.8733	10.7339	9.01017	11.9116	8.41648	8.694	9.27854	12.2931	10.1518	10.8159	9.78707	11.1328	8.11064	12.2838	8.93279	9.97795	9.28621	8.8238	9.55413	8.89891	8.98789	11.0634	11.5911	8.58558	11.2914	8.43679	11.7839	9.12845	8.89285	9.06281	13.9106
ATMU4	1.07442	1.01285	2.20441	4.32245	0.554398	1.45693	1.54969	0.00261506	2.18531	2.99411	1.43284	1.42627	0.00281207	1.47646	0.57033	0.0322582	2.54448	4.41812	3.17042	0.00338128	0.00716051	0.00350419	0.0046304	5.84467	0.722323	2.05938	0.0030851	0.00974355	0.665651	0.151338	4.18748	1.25106	1.4649	1.48499	1.53835	3.25944	1.43106	0.00988153	1.6239	0.00250042	2.15273	2.23289	0.0115833	3.66667	3.17171	0.00244738	1.59912	3.48859	4.14559
ATMU6	1.06045	0.935589	1.04819	1.46541	1.18398	1.42771	1.485	1.06803	1.38618	1.57053	1.27297	1.5069	1.35849	1.39555	1.2937	1.11585	1.27811	1.35617	1.53541	1.43247	1.43547	1.4473	1.35776	1.38937	1.32075	1.40947	1.26891	1.51266	1.35943	1.44805	1.33011	1.10369	1.37951	1.28565	1.5886	1.3365	0.981979	1.31009	1.45434	1.45588	1.28156	1.50812	1.18705	1.14676	1.59798	1.21921	1.21192	1.27517	0.960015
ATMU6N1	6.46236	6.08191	4.72042	7.26459	8.14177	6.41642	6.11158	5.55574	6.61017	3.7489	6.71997	4.62435	6.3093	7.23912	5.12098	6.15484	5.71774	7.78406	4.05791	5.33602	5.07601	6.03084	4.61661	7.61691	5.12386	6.03352	5.9994	4.88766	5.61655	8.32699	7.58869	7.96935	4.7762	6.02022	6.23429	4.68973	5.73921	5.3865	5.6059	5.61875	5.31386	4.80887	5.99289	4.54651	7.47602	5.03659	6.175	6.1565	5.86566
ATMU7	1.85113	1.98041	0.0265684	0.0266299	0.0400939	0.0192705	1.58864	0.03158	0.0282802	0.0220276	0.0214486	0.0175141	0.125497	0.0351262	0.032164	0.0189555	0.0213116	0.0265023	0.0244466	0.0313435	0.0234929	0.0204021	0.0237037	0.0350393	0.0677518	0.0299231	1.30116	0.0276378	0.0221323	2.58737	0.024882	0.0324469	0.0303848	0.0357247	0.0354888	0.0153627	0.0243932	0.0287038	1.41505	0.0228215	0.0279531	0.0252024	0.0505774	1.4472	1.4779	1.28646	0.022027	0.019402	1.20999
ATRE1	2.90334	3.17792	1.56121	0.00854126	1.22224	1.69897	0.0107517	0.00484636	1.75503	1.64947	0.00327213	0.00573446	0.0052172	0.00740359	0.0077824	1.19812	0.0242392	1.53854	0.00539361	4.33598	3.47831	0.0126752	3.0642	2.76252	0.1133	1.37662	2.8376	0.00984443	1.57697	1.57602	1.47695	1.07204	1.38461	0.0104173	0.00300596	1.85898	0.00157006	0.00439626	2.47087	0.00817345	3.16972	0.00212192	0.0106401	0.00388335	0.00431652	0.00766737	1.79373	0.00207856	0.00413419
ATTIR16T3A	51.6906	50.2229	31.2677	39.6067	61.3086	25.6988	31.0662	39.043	26.3809	24.4331	30.763	23.1221	28.3208	41.6314	49.9042	46.8101	47.0271	32.2411	29.3565	37.5883	28.8978	28.1089	36.6406	47.2696	43.9734	42.0319	46.1852	37.4767	41.5993	36.4473	38.8729	51.7807	32.9585	44.0612	43.224	25.8519	38.2531	57.0005	44.1438	36.1881	37.8755	27.3092	53.5271	59.3722	26.445	43.0306	29.4629	27.137	45.4082
BOMZH1	18.7138	18.1125	17.2248	15.1597	19.9182	15.6009	17.3035	17.2606	16.5549	18.3875	14.2495	15.0226	14.28	20.0529	16.0686	22.4348	18.7094	16.4322	13.2326	15.0196	15.374	16.0602	14.3612	18.9959	16.457	19.053	18.0432	18.2261	15.9573	13.8417	16.0293	18.3714	18.7007	20.3451	17.1364	17.9793	16.0744	18.5285	16.7086	16.8937	16.8498	14.6926	18.0042	17.4732	17.4382	20.8783	14.1815	18.9397	21.8059
BRODYAGA1	33.8615	32.6441	22.6236	24.7583	35.0689	20.5434	23.0477	24.9668	17.5914	19.2018	19.9424	20.4225	14.7855	29.0565	30.2206	27.5644	32.0937	21.7022	18.825	24.1462	16.9004	19.7824	20.368	29.4264	28.6805	23.7118	26.1255	27.2225	24.3961	24.286	23.0937	28.979	23.4629	24.3473	27.1332	17.2369	25.3816	29.5937	27.4481	23.7347	20.9337	19.4812	31.7935	30.7383	19.4411	28.4709	20.7496	17.9821	27.8286
BRODYAGA1A	40.7895	40.198	26.7454	31.3494	42.1282	23.9628	28.1697	26.3253	23.7808	24.915	23.9901	23.7148	20.0952	31.741	36.3379	32.2051	38.5259	27.2181	26.0462	28.3806	25.9191	21.6225	29.4267	33.0071	33.7417	33.277	33.5612	29.3772	29.469	30.2809	28.5914	42.2638	28.1259	27.9363	33.8793	19.2515	27.0057	32.2315	31.7157	30.0078	26.915	23.7967	36.2017	42.7878	24.9452	37.7903	23.2707	19.482	30.493
ENDOVIR1	2.07976	2.14359	2.80191	3.62598	3.59942	2.81179	4.43483	1.74088	6.97578	4.78868	4.24305	8.56022	1.44177	4.41214	5.35804	3.16622	3.16062	4.38159	1.39396	2.34663	3.24331	2.84819	2.85861	5.44834	2.27038	3.06384	4.52652	3.7713	2.84861	3.21917	5.07697	7.89226	3.1577	4.39597	5.33306	3.16272	1.2633	3.61298	5.47967	2.67627	2.95165	3.63568	4.59661	2.34943	2.21643	2.42797	3.97892	1.56602	1.56047
HARBINGER	3.42716	3.27069	4.95192	1.39477	0.888876	3.82457	0.0402582	2.32846	3.51252	0.016854	4.26978	1.5039	3.14211	2.35716	2.59845	4.78911	1.88069	2.16442	3.48408	1.35652	4.07584	5.59434	3.5511	1.42077	2.34956	0.11938	2.86034	3.1355	0.899267	1.97482	2.75606	2.49887	3.55271	1.66928	2.25043	5.7516	1.05391	3.23926	1.9675	1.22544	2.8173	2.19105	1.66123	4.77887	2.74598	3.09959	1.35956	1.97701	2.36889
META1	26.4724	27.0419	23.0896	26.2004	32.7279	18.0127	27.3236	22.727	21.7663	22.8304	20.5867	21.2984	27.368	19.6188	27.8096	25.6064	28.0551	20.4666	21.3292	20.7573	15.9591	26.6414	16.1218	26.8639	30.3905	23.3198	23.0413	30.5557	25.9115	21.2218	17.6702	25.3721	17.7504	23.7394	18.0238	20.3851	21.775	24.111	24.8123	23.9818	24.9084	26.2511	25.268	26.9971	27.9548	22.9833	24.9253	30.0633	19.0783
SIMPLEGUY1	49.8532	48.0433	50.6164	48.9925	58.0117	39.5689	40.339	42.9653	36.6822	36.8054	40.0064	39.5632	33.0656	49.0554	51.8657	54.2749	55.6207	46.7243	47.791	44.2155	42.1061	39.4026	46.3001	57.5806	57.456	53.4124	50.4571	49.0019	42.9545	43.6949	52.1371	44.8645	60.373	50.0343	50.8532	36.498	37.4672	53.3615	43.1321	45.4677	41.6717	37.5322	49.4268	50.573	38.482	50.1815	40.7064	36.7899	52.5588
SIMPLEHAT1	15.5693	15.5018	14.5414	13.6235	15.1973	12.8724	15.4704	13.3734	14.8983	13.4342	13.9824	14.7342	10.8914	11.4245	15.6407	16.213	12.0336	14.106	13.0549	15.5398	12.5757	12.1395	12.9986	17.9767	16.7396	18.6859	15.6296	15.1676	15.6446	14.0013	14.1433	16.0915	17.8629	15.5639	17.3193	10.3553	13.3448	19.2596	14.1517	15.8095	15.2933	13.1299	15.799	20.4087	14.1374	16.8943	14.1224	12.4932	16.3159
SIMPLEHAT2	15.8396	16.6269	16.5023	15.3917	20.808	13.5153	15.4351	12.5239	13.9689	11.6201	15.2558	13.5155	15.3689	16.6375	17.0512	15.8443	16.4873	14.5548	12.0353	18.3153	15.246	13.9633	16.0518	23.9954	17.1927	18.3768	17.9719	14.6869	15.8193	15.3041	18.7167	16.4841	15.1645	19.4195	21.3557	12.2235	15.7826	16.9868	16.3519	14.7674	15.7432	11.5113	18.4832	24.1174	13.79	19.9939	16.1494	10.6912	18.6471
TA1-2	0.994988	1.05299	5.41974	2.84272	3.95516	2.89888	0.00253367	2.96116	1.62389	1.54857	3.96035	4.1777	1.91601	1.58739	4.62058	1.33839	1.31516	2.82724	1.72358	1.35195	1.75473	1.82	1.63759	1.49554	2.90842	5.22874	6.04223	1.26212	1.24165	2.89236	1.44056	1.30318	2.78485	2.54196	2.62836	1.77662	3.98468	1.38323	2.07107	3.12739	3.14625	3.20779	3.76019	1.36126	1.73917	3.41691	4.09136	0.0874455	1.33542
TA1_AT	1.02407	0.872907	2.00717	3.07666	2.18532	1.45069	3.05308	2.95383	3.1128	2.44807	3.69116	3.14423	3.00327	3.53046	3.52523	2.18349	2.31721	2.26448	2.47972	3.352	3.67606	2.85696	3.04601	2.40222	3.35918	2.72638	2.52669	1.59873	2.26636	2.481	2.46785	1.39649	1.62375	3.84526	2.41332	2.46659	2.57395	1.92052	3.39666	2.70622	4.27038	2.64375	1.78303	3.27803	4.19308	2.49991	3.6527	3.04249	1.44113
TAG2	9.53927	9.61569	7.6067	3.61479	4.6121	6.76536	4.42726	4.86784	6.12482	8.24632	4.26825	3.27699	5.15279	5.25596	4.98476	6.08026	2.1304	4.58665	4.67507	5.29615	7.50526	6.09056	6.45339	4.16682	5.80962	4.95016	5.58062	2.28693	9.63667	3.83904	7.97086	6.33821	7.59068	8.08674	5.4443	3.95865	5.8748	5.99889	5.70332	3.59889	7.0639	4.30293	5.35253	4.14275	4.99086	4.76598	8.40267	3.97552	5.74237
TSCL	9.08362	9.40832	14.1519	11.7238	8.91402	16.5826	9.43055	9.91428	11.9042	12.2777	13.8368	13.9259	12.5894	14.2539	8.79295	10.9896	13.143	13.063	12.5546	10.9398	11.0093	14.217	10.8988	11.295	10.7551	11.6899	10.7561	11.7664	11.8743	14.5689	12.7142	10.4303	12.678	10.2313	11.1836	13.5708	12.801	12.8758	12.5775	12.1079	13.2349	11.2054	8.54442	8.69711	15.5879	12.3417	13.8434	13.4214	11.8771
VANDAL1	12.1996	13.0499	11.2473	14.0605	7.25269	6.49477	13.0636	7.31796	11.9821	8.44773	8.43646	15.3944	7.02451	6.65501	7.3999	8.91116	10.2847	11.3271	12.9549	12.4405	8.77865	10.0281	8.17734	9.32986	8.38806	12.5999	9.18664	9.96152	10.503	8.97042	4.43174	7.92012	8.19434	10.2684	10.1295	9.52513	9.31661	8.14722	8.31548	11.9935	10.0815	8.27895	10.6855	5.19606	13.0715	10.5797	6.52394	8.61765	10.1464
VANDAL11	0.916466	0.915455	1.29809	1.14802	1.06063	1.30613	1.18322	1.26646	1.24912	1.30951	1.26175	1.28963	1.44934	1.25074	1.20612	1.21833	1.03541	1.29941	1.20838	1.1678	1.21895	1.29585	1.16032	1.18298	1.22075	1.1798	1.1071	1.2322	1.17526	1.21151	1.16086	1.00928	1.26762	1.19978	1.23427	1.36268	1.11841	1.06204	1.11765	1.36976	1.26442	1.25847	0.52524	1.09081	1.34069	1.29043	1.29507	1.46526	1.09516
VANDAL13	2.15717	2.07915	1.5477	3.07572	3.21107	2.20732	1.51421	0.847587	1.48061	2.54788	2.13674	1.3842	0.96521	3.50192	2.91852	1.97395	2.28219	2.85596	2.17311	2.62006	0.173291	5.13024	0.163464	2.42971	0.165653	1.94801	3.20764	2.07992	3.35981	1.25384	1.2939	1.54218	2.4354	1.43238	2.20748	2.87942	3.30235	1.84189	1.8685	3.33924	2.29033	0.5204	0.164842	0.217035	2.07995	2.63394	2.16057	0.860166	3.46309
VANDAL14	7.19708	8.39635	5.76489	2.95064	2.57379	1.43389	1.47286	0.378658	0.00937353	2.47914	0.00586871	4.607	2.97815	0.392188	4.94701	2.65266	5.54807	1.86731	0.00692025	2.73153	3.01638	1.6761	2.7712	2.64689	4.04912	1.81268	0.310451	2.72643	2.2165	1.30506	2.85367	2.35756	2.39002	0.390854	0.0126824	4.93121	0.00497982	2.42969	0.947587	2.86848	2.53764	1.59211	3.50406	0.743609	0.0057068	3.25777	1.49345	0.00623908	3.58245
VANDAL16	6.49393	6.53084	4.91416	6.4337	6.40172	5.86814	6.09134	5.27092	9.11283	7.05083	7.09012	5.92355	6.4563	5.3308	3.48768	7.62073	5.85337	7.84464	8.99764	6.3566	7.89061	8.54283	7.22324	4.52943	6.19908	7.54456	7.36064	5.1791	7.88373	11.371	7.33323	4.96844	8.22848	6.39275	7.09764	5.09281	12.4955	6.91883	7.13948	6.98875	8.17465	7.34429	5.83904	4.59479	6.01338	4.88619	5.94181	5.94812	6.35716
VANDAL17	5.1845	5.26496	5.58662	9.57037	8.18204	9.75349	7.49602	9.25008	8.32036	4.9854	8.34456	10.5694	7.69827	9.53928	4.41645	5.80033	18.4358	9.00747	6.29514	13.4236	6.43664	7.3561	6.16366	7.02018	6.16293	5.41881	7.23325	6.11088	4.67211	5.62464	8.96326	9.6714	10.3057	7.80283	7.56059	13.263	4.27884	10.5466	8.4459	9.36016	6.0541	10.2003	12.1284	8.65823	6.30071	6.07891	9.52826	8.23115	5.32091
VANDAL1N1	17.4124	16.7529	11.0523	13.7238	14.0616	12.7999	10.9973	10.4171	12.5406	12.1872	13.4893	13.3931	9.73515	11.0886	14.0853	15.8411	14.591	11.0102	10.2463	14.4107	11.3944	8.91533	12.1516	11.6201	11.8073	18.1097	16.2325	13.7904	10.9551	13.5846	16.3429	12.1116	14.629	14.9241	9.6517	14.5602	9.93061	13.5439	11.2017	12.6849	13.5109	8.07103	8.93918	14.9322	13.0973	15.8559	13.2634	8.96591	16.7284
VANDAL20	4.88239	4.90956	4.8556	6.14347	3.34484	8.49974	6.88848	3.67086	5.98387	6.55449	9.05404	6.78739	8.18294	8.47417	5.78398	5.2484	5.79807	5.21787	6.55326	5.82848	6.2843	7.34716	5.81767	5.75647	5.85924	4.02029	5.97896	5.24083	4.88085	5.63225	7.43401	4.45839	5.60298	6.42232	4.71578	6.90142	5.32019	3.84614	4.19851	6.501	6.53198	5.13905	4.8765	6.03389	6.71421	8.79704	5.43223	4.00705	6.62496
VANDAL21	16.2595	16.7216	20.5979	24.6617	15.1662	26.5663	26.7095	25.7976	26.4893	23.2452	21.849	22.5664	22.134	24.3737	17.3103	21.247	19.6444	18.2572	27.5196	22.1903	23.2643	25.2556	21.5047	21.732	22.2878	33.0695	23.0794	28.822	25.8522	29.4714	22.6471	18.3938	17.0473	24.3658	19.1828	24.282	26.6315	20.1075	25.8874	26.9084	18.7636	26.5939	15.801	18.0065	26.1556	18.809	27.5478	27.8973	20.965
VANDAL22	2.14022	2.03882	2.94191	3.04259	2.15585	3.28107	3.07031	3.10907	2.87042	2.17855	2.73313	3.04944	3.1901	2.9759	2.66684	2.3267	2.68137	2.44208	2.6622	2.91318	3.31344	2.83697	3.10823	2.87371	2.59214	3.02034	2.85986	2.85621	2.93548	3.143	2.5331	2.17229	1.82622	3.15037	2.02814	2.90679	2.85129	2.05795	2.95063	2.95545	3.29268	2.96312	2.63539	2.40436	3.32127	2.53616	2.56245	3.88332	2.20633
VANDAL2N1	17.9395	18.1202	21.3635	23.8026	19.5614	21.4582	24.1451	17.5352	22.2652	25.1798	24.8675	19.6112	24.2792	24.9325	22.8373	21.6106	17.0766	19.6368	18.4759	16.952	22.2968	18.5395	21.6286	18.3369	21.5837	22.9309	20.0525	17.3168	20.383	20.2697	15.8684	14.9439	23.5491	26.1548	24.1618	21.5671	21.0554	14.4427	19.7725	20.1439	20.5576	22.7672	17.2491	21.6422	25.155	19.0429	18.4057	23.3242	20.3886
VANDAL3	10.307	9.9409	16.8724	12.7131	11.459	16.2375	17.2555	12.8553	15.7752	16.2892	13.909	12.8496	16.8702	16.9305	13.4013	12.469	12.2247	20.3318	11.4883	15.3595	11.9797	9.61914	11.0746	16.6148	14.0797	10.7032	12.5151	9.37426	13.3044	13.68	10.0249	13.7871	13.9746	15.1943	19.4507	12.7509	14.0732	12.1647	13.21	11.2682	9.07592	14.2933	9.6506	12.2974	9.23503	13.2046	14.0712	17.8428	13.4404
VANDAL5	5.04219	5.08384	5.44432	6.69256	5.36758	5.28072	7.37963	3.89005	4.91106	5.57137	3.59959	5.22013	5.64697	4.67332	3.109	4.89983	4.38618	4.54152	5.73362	4.39867	6.46866	5.25446	6.03857	4.66838	6.29979	6.1867	4.71299	5.98068	5.2585	5.40305	5.52604	3.53456	5.55122	5.39601	6.13329	4.987	6.11197	4.15579	6.40601	6.75918	4.81967	4.83361	6.43627	4.88444	6.22137	4.83348	5.85503	4.98946	6.46372
VANDAL6	13.8174	14.7758	15.7794	15.0928	15.1342	11.2306	24.6233	8.5253	10.2538	15.0292	20.3287	16.4772	14.4248	15.6919	17.3646	13.9238	12.4055	11.3589	18.997	9.68096	16.3601	17.0107	15.1692	16.0806	13.086	12.4133	15.9093	17.1284	19.0039	17.4962	14.8816	8.41823	13.393	9.6948	15.3632	16.8203	7.77362	14.9103	14.6616	8.87169	17.6439	12.1461	4.94334	11.8734	19.8842	12.949	13.9792	12.2951	9.64342
[truncated: 163 more columns]

## Sheet: B
TE FAMILY	Aedal-1	Aedal-3	Ale-Stenar-44-4	Ale-Stenar-56-14	Ale-Stenar-64-24	Algutsrum	App1-12	App1-14	App1-16	Baa1-2	Baa4-1	Baa5-1	Bil-5	Bil-7	Broesarp-34-145	Broet1-6	Doer-10	Dra2-1	Dra3-1	Eden-1	Eden-2	Eden-7	Eden-9	Eds-1	Eds-9	Faeb-2	Faeb-4	Fael-1	Fjae1-1	Fjae1-2	Fjae1-5	Fjae2-4	Fly2-1	Fly2-2	Fri_2	Gro-3	Groen-12	Groen-14	Groen-5	Had-1	Had-2	Hag-2	Hal-1	Ham-1	Hel-3	Hola-1-1	Hola_1_2	Hola-2-2	Hov1-10
ARNOLD1	1.04815	0.751285	1.05721	0.755616	0.904424	0.747672	0.552274	0.909872	0.903868	0.584802	0.552148	0.534488	0.419581	0.620259	0.453759	0.141073	0.862259	0.933297	1.08569	0.851838	0.676517	1.40744	0.863011	0.482539	1.00228	0.527008	1.23944	1.25838	1.0475	0.921109	0.433811	0.815208	0.548615	0.766932	0.741568	0.599413	0.958976	1.30491	0.99303	0.629783	1.08597	0.848454	0.880022	0.593116	1.6262	0.920866	0.876992	0.743357	1.04311
ARNOLD2	6.30803	5.37784	5.67038	7.76167	5.80372	4.59357	3.68755	6.3907	7.09606	4.05454	3.47001	3.50616	4.62918	6.46246	2.89084	2.55244	5.85364	7.27376	6.98853	6.32404	4.97203	10.4652	6.2314	4.0321	8.29015	3.8858	8.02994	8.59025	5.51656	4.80501	2.54676	5.08654	6.1712	7.3062	5.50565	5.0566	8.55658	8.70824	6.60198	5.27261	7.55744	8.53755	7.01444	4.38482	6.78258	7.21214	8.43934	5.99342	8.78326
ARNOLDY1	25.7187	25.5026	23.9812	29.98	30.5922	22.6918	18.4071	19.8539	24.8109	9.42585	19.3139	17.2812	5.66779	11.5802	24.0495	3.97815	11.648	21.5963	25.6743	29.1601	29.0523	37.7785	17.5169	8.97109	30.6794	6.06695	32.3692	29.3498	25.4791	17.0134	14.0563	23.1922	22.9357	21.9539	35.027	22.0374	26.3029	32.728	19.3481	26.6531	32.9404	28.8454	28.6499	21.2684	34.5887	35.6773	17.3537	25.2386	18.1531
AT9MU1	4.09125	3.93296	4.14605	5.78106	6.33376	2.58237	4.50555	3.1397	4.16989	7.58435	4.02494	3.88174	3.63188	4.51961	2.51562	2.2725	3.6584	3.04515	4.11006	3.46457	4.40162	4.82005	3.1783	3.62328	4.06697	1.87037	2.21564	2.21268	2.87593	2.65871	2.85124	0.715248	1.66893	1.9737	2.93752	4.16988	2.65119	4.78197	3.88675	6.07058	6.12641	4.58101	5.57427	6.1314	3.19419	2.71288	2.24025	1.94091	4.47115
AT9NMU1	10.028	13.1244	12.3572	11.5213	14.1268	8.9844	8.1524	12.5678	12.9154	7.93541	14.2386	12.6063	5.38622	7.28083	10.5098	4.70865	8.06346	8.33021	11.9408	12.1859	11.1756	16.094	10.2065	8.26945	13.3331	5.42667	12.7708	10.8713	13.3339	8.60983	9.73789	5.9191	9.01933	9.14991	10.4954	7.92669	8.58211	8.90367	9.07566	9.13768	9.56596	9.79062	12.1838	11.2484	14.2558	12.3623	9.11724	11.5366	6.66253
AT9TSD1	7.49824	6.80394	6.44171	7.44291	7.77237	6.53561	5.5921	4.81482	5.1984	2.01238	5.17027	4.18781	2.48553	3.58741	8.33473	1.24289	5.03426	5.59956	7.65678	8.99579	9.16331	10.0526	6.8308	3.49832	7.7823	2.33832	7.69598	8.08142	7.00407	6.43319	4.95716	6.8515	6.06374	5.99008	9.03607	6.73926	6.68946	7.96441	5.46119	7.1191	8.47587	6.07927	6.01558	6.01449	8.02422	8.09271	5.34024	5.56049	5.88616
ATCOPIA1	3.15548	2.99556	3.05739	3.2961	3.04467	4.30135	4.61159	2.56094	2.8424	2.84873	2.68956	2.54007	3.11728	3.5124	2.85012	2.13478	3.03133	3.14798	2.93448	3.2581	2.89288	3.13559	4.5584	4.27852	4.64993	3.14146	3.64523	3.69336	2.67841	3.09279	2.84471	2.65038	3.22112	3.65399	3.31666	3.26734	2.90668	2.92448	3.35114	3.14937	3.04998	3.35554	4.27571	3.54196	2.97422	3.12342	3.35346	3.43871	3.15838
ATCOPIA10	8.42707	6.17425	7.74869	7.44896	5.92092	6.32445	3.10429	9.05266	8.78439	10.2731	7.22296	7.52415	5.54341	5.82077	1.85368	9.57585	6.86666	7.01747	6.49184	4.9831	5.8841	6.2178	6.3747	9.59389	7.93051	13.8342	3.69141	11.9305	4.78659	5.18774	8.56633	5.75768	4.92225	6.28928	9.10751	7.85617	6.88271	7.303	10.79	9.36171	10.0512	9.64673	7.14768	5.56611	4.7579	7.42847	8.55979	8.25552	9.64493
ATCOPIA11	1.80406	0.0179044	2.63211	1.44121	1.53515	3.13846	1.59998	2.8042	2.88584	4.39359	3.0524	3.08758	3.35162	3.56438	0.0512594	1.77365	0.0136904	0.0759343	1.48529	1.50161	1.60246	1.39716	1.72374	2.20105	0.0217695	1.94597	1.69261	1.70604	1.53206	2.36515	1.80823	0.0644016	0.0979755	1.7198	2.71627	3.05856	1.54303	1.575	1.69941	1.60512	1.44442	3.19003	1.8374	1.41577	1.66784	2.78877	3.00533	4.58608	3.05744
ATCOPIA12	6.38033	9.07023	5.85653	4.75646	5.16424	5.01984	6.5827	7.9673	5.31602	5.8338	5.11851	6.01962	4.26559	4.02502	7.09517	9.77588	7.07467	4.97531	6.3107	3.15535	4.6691	5.47214	7.99088	12.7087	8.4444	6.41591	3.24566	5.21601	3.1991	5.33381	6.60921	6.23033	3.47987	3.60397	6.4031	5.15984	6.51937	5.70135	4.87308	5.56904	4.95078	7.10908	5.00796	3.84404	4.96905	3.04027	3.43161	3.79538	6.19245
ATCOPIA13	7.06812	6.67669	10.4594	6.5821	10.7048	3.39791	7.55656	6.55505	4.82411	5.92879	8.95947	10.3596	9.75818	9.2542	10.537	5.99424	5.30153	6.59293	6.51942	6.33459	6.34037	6.90279	6.48118	5.91906	6.6994	6.34708	6.96413	6.4775	8.31708	5.48543	9.31635	2.97397	6.63079	6.75579	6.2932	9.56101	6.64313	5.97475	8.70519	4.89157	4.51399	6.78434	9.15919	10.7359	4.91716	8.27142	9.52771	9.84032	8.55047
ATCOPIA14	0.00682136	0.00376689	1.78693	1.64428	1.70453	1.48372	1.44586	1.38697	1.53637	0.0112046	0.00821738	0.00593024	0.0103933	0.0113503	0.00784551	0.0388207	0.00390845	0.0111637	0.00493912	1.56842	0.0130561	1.3596	1.5399	0.00670464	0.00763352	0.0108803	0.0197658	0.0312184	0.00257381	0.0103735	1.53587	0.00812888	0.00745672	0.00664612	0.00396838	0.0191273	0.00897665	0.00746908	0.00497937	0.0104869	0.00300287	0	0.00762641	0.00260847	1.65236	0.0048548	0.00612401	0.0251078	1.4684
ATCOPIA15	3.03659	3.21564	3.04427	2.89037	2.78707	3.24353	2.76847	2.79015	3.08057	3.15138	3.19433	3.26397	3.48143	3.78953	3.34424	3.13088	3.09584	3.04678	2.94395	2.85752	2.88778	2.63658	3.02535	3.29933	3.16959	3.58726	2.90204	3.17103	4.72533	4.83844	3.18039	2.60199	3.12795	3.33889	3.39035	3.09675	2.95521	2.94822	2.89324	3.45291	2.98038	2.91008	3.23174	3.62755	3.04423	3.24465	3.42245	3.54287	2.96451
ATCOPIA16	1.866	1.80952	2.12623	3.1805	1.48621	4.44885	2.87356	2.93366	1.50226	1.3443	1.42379	1.5942	2.68852	2.96937	3.04448	2.87645	2.87983	2.0017	3.27532	1.32641	3.03817	1.44331	1.39381	1.7955	2.02955	4.89963	3.59465	5.21202	1.63312	0.013187	2.82157	1.28106	2.92471	1.38466	3.48206	3.80245	2.8591	4.4957	3.23682	3.32291	1.68053	1.69314	3.14252	3.75567	3.51713	2.87287	3.33007	3.33673	2.66358
ATCOPIA18	1.61166	1.44594	1.68971	1.64256	1.37399	1.60256	1.46319	1.501	1.55776	1.65878	1.49892	1.78454	1.48811	1.84074	1.57789	1.53145	1.72037	1.55966	1.40606	1.45577	1.54155	1.28943	1.52545	1.58742	1.65873	1.75144	1.53836	1.74848	1.71669	1.67561	1.46324	1.33185	1.56143	1.64872	1.82442	1.50641	1.58593	1.56037	1.63214	1.69234	1.51925	1.81366	1.76761	1.592	0.0207395	1.50424	1.65759	1.65815	1.64995
ATCOPIA2	0.000787095	0.00634592	0.00782162	0.00478287	1.82033	0.00827206	1.42282	4.04843	0.00198177	5.07316	4.45285	5.253	6.20192	5.12488	0.810519	0.0698897	0.00392642	0.00887864	2.51407	0.00612547	1.70159	0.00527411	2.32204	0	0.00968739	0.0252262	2.1265	1.88734	4.68819	0.0165764	2.47417	0.409399	0.00250504	0.014569	0.00177103	4.59073	0.000778248	0	0.0249434	4.39903	4.18278	0.736143	0	0.00219881	2.13969	3.25863	1.98695	4.61612	0.00623303
ATCOPIA20	2.50156	2.26404	2.63201	2.24898	1.26618	2.86945	2.7941	4.80704	2.40252	1.97084	2.01199	2.15035	2.82803	2.61014	2.61848	4.64446	2.52341	1.8037	2.08411	2.17252	1.33544	1.87808	0.481434	2.51155	2.4232	3.9558	1.79009	1.77335	2.62617	3.1999	2.00602	2.06775	3.8692	3.99624	2.85667	2.50191	2.45369	2.20507	3.03013	3.78799	2.4808	2.00349	3.6154	1.04785	2.27104	5.01305	5.64895	4.93376	2.83321
ATCOPIA21	2.28986	0.00611767	3.15949	1.93075	2.65055	2.31874	0.0177352	1.91747	2.09268	0.0137502	0.00669942	0.00190409	8.99299	7.45767	8.92045	7.28314	0.0268782	0.00635853	0.912623	0.00324972	1.87089	1.493	2.97245	0.0226865	0.0155291	0.0218751	0.0159998	0.00711859	1.90057	0.00396889	0.00224497	4.28415	2.37486	2.11237	1.53854	2.68128	3.69227	1.30496	1.98362	0.00186963	0.00385024	4.07936	2.36094	2.27558	1.98852	0.00362679	2.20689	2.49956	2.25437
ATCOPIA22	1.98099	1.99372	2.07125	3.64808	1.89249	1.83786	1.77696	3.51699	5.26813	5.99735	1.78138	2.01752	6.37346	6.75453	5.67389	5.75484	0.0207226	1.86383	1.72189	1.87762	2.01522	1.95943	1.80721	4.33223	3.69298	2.22474	3.66993	1.89737	3.46396	0.770475	3.72981	4.94304	1.72601	3.59254	3.55025	3.8248	0.0139581	1.76327	3.67127	3.89071	3.98998	2.37355	0.0144003	5.53149	0.00888517	2.75049	2.11118	1.92807	3.84811
ATCOPIA23	5.37561	6.70652	4.61057	3.31942	3.00577	6.6728	3.00275	4.5627	6.42228	1.75595	3.20365	3.76711	8.72502	8.25183	3.21514	5.19581	3.76115	6.53973	4.76055	5.08323	4.57976	4.0376	4.84389	5.8181	5.11805	10.4751	4.92072	5.518	2.97071	1.73499	1.46313	4.31929	6.66351	6.64758	5.30496	6.74013	6.65252	8.0889	4.98674	1.33478	1.31415	6.90886	1.39845	1.84108	5.02524	2.98043	3.11042	3.36044	4.49241
ATCOPIA25	0.00907439	1.68607	0.00145202	0.00398977	0.000907326	0.00442407	0.00187732	0.00230637	1.75001	1.82398	0.00361549	0.00362981	0.00102181	0.00442854	0.00120299	0.00442735	0.00583958	1.77118	1.62188	0.00659123	0.0049216	0.00505519	0.00168956	0.00089319	0.00180333	0.00772931	0.00419261	0.00657972	1.71898	1.72754	1.85188	1.69433	1.76246	1.80528	0.00729276	0.0144242	0.00561544	0.00338352	0.00186762	0.00825709	0.00192793	1.78361	1.90775	0.937224	1.79415	0.00664422	0.00571725	0.000948882	0.00467073
ATCOPIA26	1.98265	1.68351	2.00848	1.44729	1.92599	1.68758	1.54959	0.0189932	0.0135548	1.84809	1.7276	1.89559	2.16544	2.10334	1.79822	4.21678	1.74822	1.34874	1.70493	0.0099701	0.013242	0.023916	0.00984284	2.15895	1.68214	2.21592	1.74346	0.014483	1.66988	1.67393	1.77288	1.34031	0.0257036	1.77196	0.0180883	0.0198527	1.62119	1.54665	0.022065	1.87277	1.70903	3.68215	0.00513239	1.8591	3.83169	0.0230415	0.0206997	0.0797054	1.65295
ATCOPIA27	7.42223	3.25094	13.9357	9.0976	9.17285	5.5743	5.41954	7.27492	5.34335	14.6219	10.3373	11.0515	7.24725	6.10196	9.55252	15.0691	13.0619	13.9835	5.016	8.79478	12.1776	9.86225	9.69787	3.29401	4.83242	11.3423	12.7111	12.225	8.92252	5.60151	10.67	8.09524	7.5913	5.68022	8.19467	5.48108	3.07089	8.38459	8.9161	11.8745	9.04271	10.8495	7.64341	3.49604	10.4077	6.67831	8.67913	7.33533	9.96182
ATCOPIA28	6.4185	3.02234	6.51328	8.45861	6.72428	4.87266	4.3689	5.999	7.15592	2.92061	4.93408	5.11931	3.31992	3.73021	6.11534	4.07583	6.30409	5.04196	3.84745	6.23987	6.61635	4.64322	5.26048	4.60326	6.29868	7.18896	8.15902	10.0076	5.75831	6.31008	4.72262	6.20296	8.47007	10.1428	6.6821	6.88461	4.52429	5.02783	3.76309	5.9657	6.74778	3.99408	5.64839	8.73369	3.7939	8.71744	9.72044	9.97659	6.17245
ATCOPIA3	1.99675	0.0145173	0.428273	0.404673	0.4198	1.38746	2.52394	1.77073	2.01677	2.80071	0.00285292	0.00132252	2.73269	2.2837	0	3.07357	0.476949	3.86874	2.73713	0.46986	2.2166	1.71117	0.504966	0.0601113	0.0535957	2.71638	3.52087	1.88361	1.8976	4.35074	4.25007	1.90596	2.02715	3.792	1.58839	0.0500579	0.00566735	0.00625103	2.02179	0.00110072	0.00191807	0.0137827	1.9084	1.90591	0.00334974	1.64655	2.0348	2.21869	2.00674
ATCOPIA31	2.22792	2.07321	0.136907	1.9013	0.0854513	0.178518	1.84917	1.87386	0.00541613	4.30264	3.89727	4.09213	0.00709599	0.00980506	0.0134264	2.76414	0.198862	2.09259	0.0138126	5.82353	5.79197	2.13996	2.07974	0.0156205	0.0130266	0.235241	2.86927	1.97013	1.86022	0.00719065	0.0156284	0.0306985	5.61057	3.61073	1.81683	1.97127	1.99772	0.0539096	0.0112832	2.02599	0.201888	0.00825853	2.04254	2.06932	0.0159343	4.02601	4.73991	4.20229	3.57943
ATCOPIA32	0.0787206	0.088684	1.90095	0.414224	1.50565	0.00582237	0.110706	1.6791	1.7267	0.115929	0.102349	0.0850219	0.10591	0.111612	0.00394205	1.23883	0.107262	0.349299	1.70177	0.120522	0.0989992	0.0920402	0.0884815	0.106215	0.0981983	1.3978	0.00590462	0.117334	0.111506	0.103552	0.0040019	0.00435506	0.101664	0.132327	1.77424	0.117898	0.0920783	0.00395233	0.0115221	0.0966933	0.0956186	0.0928992	1.91606	0.314368	1.92254	1.71902	0.109342	1.92854	0.0122927
ATCOPIA35	6.2369	7.06122	4.79408	5.92863	4.81174	6.63046	6.18655	4.6461	5.91729	7.65636	6.28015	6.53253	8.08705	8.59692	8.20586	2.67095	8.09223	6.89926	7.34588	6.01156	7.18271	5.45256	7.2179	8.65198	6.47191	10.2045	7.95719	7.78366	5.136	5.74175	7.0976	5.84222	6.83043	5.56795	6.79398	7.50133	7.56399	8.34053	7.9286	5.41637	4.79788	8.67838	6.61522	7.01707	10.0802	5.94488	7.29419	7.50561	7.0903
ATCOPIA36	5.63071	9.985	8.72325	9.0341	9.10578	8.29634	9.35825	10.1851	10.0437	11.8819	8.63216	9.53279	12.6226	12.2747	12.6673	9.55419	5.77197	11.8526	6.67927	13.5678	13.5002	8.71259	14.2066	17.9329	14.0333	16.6182	10.4968	11.2741	11.8305	11.6317	7.61265	8.9613	10.8305	12.612	11.2253	14.1037	11.9463	12.587	12.5472	8.86753	9.88211	12.758	12.6553	13.2448	4.81399	9.6884	11.131	13.6923	8.91974
ATCOPIA4	4.36166	3.70186	3.56479	6.24756	5.323	8.33382	10.299	5.98153	12.3528	7.93427	6.94627	7.74412	10.5536	7.69894	0.0107642	11.1156	8.22558	5.25925	7.10841	7.68365	4.40446	4.60635	8.44194	5.29968	3.55671	9.24145	5.45718	3.52803	6.15126	5.17387	5.27255	7.49164	2.58297	0.170162	3.36344	2.54331	5.68013	3.57822	4.39933	2.57452	3.61809	2.20116	0.0336785	6.3368	1.83156	4.13113	4.38939	4.98636	3.61907
ATCOPIA45	4.88456	4.93093	4.68568	5.57896	4.49735	4.65643	6.304	4.49665	6.04311	7.50271	6.41525	6.46536	8.80105	9.29541	6.46456	3.7255	7.68552	6.72288	5.82851	4.12578	5.78575	4.01037	4.51929	7.29903	6.12939	6.96044	4.62822	4.93314	4.58611	4.22932	4.8447	5.50979	4.4602	6.29771	4.97615	7.99075	4.52823	4.62536	6.38722	6.6879	6.0557	8.56244	4.92898	6.96332	5.8807	5.61012	6.51871	6.0911	5.59245
ATCOPIA47	0.000722856	1.818	2.04115	1.83563	1.62653	0.00442062	2.04495	1.73154	1.79073	2.13052	0.00308978	0.00238697	2.8284	2.35488	1.92665	3.01884	2.27068	1.82221	1.93951	1.72426	0.00388271	1.47739	0.00221605	2.29909	1.76269	0.00848548	0.785636	0.00142653	1.84076	2.01663	1.99187	1.7702	1.93458	1.87506	0.00200158	0.00284089	1.85555	1.7681	0	2.00911	1.7588	0.000744405	1.85856	2.0882	1.86482	1.75112	2.03035	2.26168	1.878
ATCOPIA48	3.58749	3.32935	5.09403	5.2845	4.86609	5.07978	3.35343	5.37634	7.53851	8.75074	3.43231	3.56785	11.2445	9.75949	3.23443	7.99004	3.93898	6.8847	4.73933	8.09983	5.79051	2.68868	7.0388	6.49373	5.67618	4.88456	3.3664	3.39937	2.90735	4.30177	4.65442	3.91381	3.45101	3.61734	5.77785	5.75111	3.14412	2.93376	3.34544	3.06593	2.84837	6.97201	3.07413	3.58233	6.81734	3.02994	3.32275	3.68125	3.76296
ATCOPIA49	7.42769	5.54877	5.11958	7.77766	6.31303	7.99767	7.13996	8.45116	8.95605	7.05722	8.04899	8.12803	3.95796	4.31638	5.50266	9.12955	7.54406	10.8916	9.07381	3.80449	0.716925	6.50837	8.66004	5.9751	4.02188	5.32585	3.72872	4.10552	7.43582	10.2235	11.6892	11.2692	4.87761	2.27673	6.35285	2.18027	7.18163	6.60248	5.61789	9.09298	8.43616	9.19096	7.96905	6.96375	3.49006	6.92948	6.50951	8.16218	11.3411
ATCOPIA52	5.12726	3.32987	2.8894	4.70386	1.41334	3.20129	1.59576	1.5925	0.00824957	1.85436	1.78198	1.78524	0.00543469	0.00220894	0.00647119	0.130274	0.0174583	1.79244	0.00294375	2.88234	2.91599	1.29929	3.03148	4.04598	5.02384	0.0133127	0.00522815	0.00355664	1.60623	1.65457	1.76872	3.00802	1.57311	1.80909	5.06903	0.00756746	3.36299	1.53793	2.95852	3.57497	3.14989	0.00816032	3.15579	0.00236954	1.54376	0.00556466	0.00408299	0.0023665	1.25499
ATCOPIA55	0	0	0.0209618	0.0348248	0.00533485	0.0308525	0.0200717	0.0220292	0.0222271	0.0236369	0.0189669	0.00952551	0.115873	0.0829892	0.0550747	0.012879	0.046034	0	0.0238822	0.0606007	0.00284463	0.0403112	0.020206	0.00263071	0	0.0740259	0	0	0.00374532	0	0.0238942	0.00639022	1.7739	1.8972	0	0.0100897	0.0206432	0	0.0697709	0	0.017586	0	0	0	0.0137013	0	0.00119284	0.00275144	0.00112277
ATCOPIA56	1.2091	0.00679357	1.84405	4.44349	3.2884	3.40856	0.0131053	4.54762	2.94355	1.88791	0.019959	0.00461917	1.63956	1.58632	4.75014	2.02402	0.00530412	3.5463	4.04524	0.00845134	0.00189347	1.13586	1.22634	0.00582357	0.0116966	1.51682	0.00992822	1.20299	2.8537	4.2806	3.13632	4.37304	1.39128	1.52879	3.03948	1.12859	1.20072	0.00627355	1.30238	1.72066	0.0480495	1.57372	3.10276	1.92156	1.096	1.5879	1.70692	1.54206	1.4833
ATCOPIA57	3.20149	4.27827	7.00672	11.0201	7.93116	7.08021	6.3417	5.93946	4.79765	9.29841	5.80405	6.21184	7.69793	7.76979	11.0448	10.5679	4.89032	9.96545	9.42098	7.75668	5.74724	3.58823	5.45205	8.57487	8.70518	4.9617	7.75968	4.78455	6.98988	7.30421	8.2267	4.70486	7.60834	7.28874	4.55535	7.16677	8.24062	7.59468	4.05758	8.07543	8.55941	4.98064	4.38742	7.93326	3.99948	8.79528	9.00987	7.71036	10.2464
ATCOPIA58	6.64638	3.54795	5.27681	5.87999	6.61042	4.85215	4.35511	7.02427	7.37272	4.93132	3.21776	3.5018	6.22275	6.80571	6.07756	2.15784	4.7684	3.85196	5.10012	4.67073	3.17174	4.09309	7.06974	5.5578	5.03727	6.37257	3.47912	8.40977	1.95011	5.60662	7.02898	5.46297	3.34358	3.58579	6.85013	5.54096	5.89601	4.86053	3.05671	3.45185	4.79947	5.64301	5.64945	4.08201	7.29927	1.96915	3.84804	2.1388	4.68269
ATCOPIA63	4.69796	2.93732	0.00910675	0	0.0151907	1.60984	0.00521838	2.79902	1.8626	0.0840225	0.0190375	0.00632183	3.3479	3.70492	0.00466297	0.0388272	5.26892	1.67775	1.48282	2.9665	1.55992	2.69176	0.0123475	5.47909	3.10197	3.56536	3.34811	3.19066	0.0115653	0.02117	0.392769	2.80216	1.44945	0.00764162	4.67976	3.06376	0.0310181	4.38278	1.49347	3.36844	3.09663	3.18759	0.0154577	1.53441	4.68161	0.0126069	0.00710735	0.0189663	0.0197629
ATCOPIA65	3.06789	3.38004	2.56567	1.89554	1.97435	0.903813	2.26438	1.958	2.20102	3.06993	3.83973	3.64823	3.60181	4.22463	3.20829	1.50653	3.11662	3.52026	0.401808	4.16694	5.7247	3.53155	2.54254	2.40808	2.18946	2.72398	4.28728	4.36883	3.16509	2.08225	3.33757	3.24836	4.87708	3.77564	1.1883	2.06757	2.11449	1.96997	3.71511	3.51065	3.47601	0.392098	3.41248	1.28812	2.04982	3.66145	4.12411	3.84407	1.68081
ATCOPIA67	3.12505	3.17356	3.21542	2.94543	3.09062	3.60426	3.28765	3.22235	3.49826	3.88966	3.63415	3.72431	4.4491	3.88089	3.37318	4.72187	3.44994	3.19262	3.36728	2.92026	2.92984	2.82764	3.406	3.99857	3.16895	3.56649	3.25104	3.2287	3.31736	3.37056	3.58381	2.81229	3.23266	3.12672	3.10115	3.41619	3.11378	3.19964	3.41812	3.31991	2.87628	3.33725	2.51365	3.73576	3.15021	2.78924	3.10362	3.38081	3.02621
ATCOPIA69	4.37746	4.15391	5.54305	4.34394	7.06861	6.00002	6.09935	4.4131	4.26952	3.96784	2.76754	2.96897	4.56172	5.05809	4.84704	3.30044	4.19874	1.77557	3.05258	3.88054	5.17591	3.60849	5.38562	2.71725	3.13296	4.48844	3.8358	4.57049	4.40694	3.20802	4.69607	4.11673	8.31875	7.14878	3.4271	5.84618	5.52469	5.43074	3.07367	4.86058	3.27945	4.95303	5.73452	4.91254	4.63109	4.41335	9.66708	6.23156	4.55441
ATCOPIA72	0.261593	0.235955	3.11519	0.00524696	0.180794	0.0162734	1.76282	1.58779	3.22971	1.86871	0.00927862	0.0105912	2.17996	1.96819	1.65148	2.17614	0.3943	3.56983	0.00165576	0.00297194	0.0113915	0.00171568	0.0147719	0.410428	0.340672	0.440499	0.294606	0.284659	2.94827	1.83105	4.87166	1.63588	1.22129	1.17981	0.31214	0.00605799	1.99641	0.00599605	2.42421	0.0061321	0.00486802	0.265083	0	1.58197	1.69102	0.265954	0.00718736	0.0119957	0.00859949
ATCOPIA74	1.76358	1.59171	1.68677	0	1.40385	0	3.13692	0	0.245527	1.92405	3.57466	3.60944	0	0	0.197111	0.0473034	0	0.00291124	0.00206625	1.48558	1.39357	1.21971	1.49054	1.86773	1.60745	2.16416	0.00661991	0.00187643	0	2.9373	1.67028	1.55559	3.37624	3.4925	0	0	1.75567	1.48677	1.55609	2.59404	3.06605	6.82264	0.00785255	0.212494	0	1.6822	1.69697	1.62005	1.73931
ATCOPIA75	10.0121	9.56126	8.50456	6.89357	6.86008	6.43048	8.19742	9.75235	6.56059	6.70453	6.59076	6.56425	7.44585	7.25049	8.36023	12.9734	10.7654	8.26108	10.2823	8.19077	7.44224	7.48878	8.10483	12.9533	7.76627	9.93611	8.13014	9.95394	7.69043	7.67518	8.98045	9.08355	8.15118	8.37912	6.39964	6.53293	10.4446	10.6648	7.52181	9.14661	8.0767	11.6578	10.069	8.85824	6.08446	7.57256	8.13138	8.7952	11.3421
ATCOPIA78	12.7014	14.7982	8.156	15.094	7.55894	7.17052	7.89011	6.53877	9.34478	13.8848	14.1467	12.6286	9.35171	11.5946	16.341	6.78328	9.64316	9.6633	13.9906	9.90771	13.9247	14.9944	8.08418	12.7054	11.2043	9.57855	12.4911	11.5698	2.9548	4.17874	9.87627	6.99403	9.62989	8.71371	9.90201	11.4181	9.95686	4.83217	7.94162	10.5989	14.8469	6.49478	8.60839	4.23165	9.94373	7.36781	11.9285	6.35253	8.55776
ATCOPIA79	3.85636	3.33186	3.76159	1.56999	3.21072	2.04129	2.15472	1.74259	3.41842	4.11063	3.81917	4.03305	4.62304	4.59204	2.33062	2.7012	3.83698	3.63353	2.09456	3.63545	1.58334	2.8517	1.81057	4.59548	3.64815	4.74171	3.44498	3.91047	3.46095	4.51819	4.30717	3.41271	3.63675	3.50704	1.95459	3.55469	3.34448	3.27011	3.5849	2.3602	2.19022	4.42456	1.85935	4.18897	3.70122	3.36594	3.82504	4.01015	2.54218
ATCOPIA85	0.00436614	0.00513291	0.0113132	0.00904025	0.0026528	0.00900425	1.77396	0.00966421	0.00249209	0.00382799	0.00369983	0.00406824	0	0.00142418	0.00904975	0.0021815	0.00377089	0.639111	1.59894	1.02721	1.07089	0.00697767	0.00329324	0.00757344	0.00548324	0.00453708	0.00576159	0.00693173	0.00553079	0.00796963	0.00529325	0.642033	1.48786	1.5939	0.00655564	0.00677997	0.00623117	0.00246422	0.0108315	0.0160454	0.0248341	0.00394514	0.00237749	0.00615846	0.0036195	0.00701757	0.00445139	0.0045773	0.00614569
ATCOPIA89	3.84168	3.21574	3.58513	3.51065	2.83803	3.65023	3.77148	3.21165	3.3278	3.54452	4.56772	4.7482	6.02869	5.58128	1.98866	2.62307	3.748	3.72775	2.87256	3.14025	2.53047	2.76301	3.00915	4.16968	3.44329	4.16799	1.78528	3.20673	3.43416	3.74931	5.32515	4.82284	3.60799	3.56844	3.67555	2.99509	2.90319	2.74351	3.04116	2.05406	3.34305	3.71212	3.56412	5.44492	3.38151	4.81027	3.53523	4.16031	3.55735
ATCOPIA8A	1.84035	1.76486	0.0913517	0.100029	0.0623681	0	0.00279363	0.0781277	0.0765097	0.0626402	1.83131	1.95019	0.0530621	0.0467348	1.5679	0.0615531	1.90339	0.0602118	0	1.80202	1.5725	1.48846	1.70833	2.3349	1.78832	0.0542255	1.79627	1.85031	0	1.87671	0.108789	0.0710769	0.0667507	0.077337	1.81021	1.54575	1.7571	1.66998	1.68879	0.00433671	0.0043243	0.0666218	0.0664208	0.081886	0.0724078	0.0764464	0.0717414	0.0799106	0.0871473
ATCOPIA8B	1.28647	1.23306	0.00781275	1.84014	0	1.32006	0.0128152	0.00210304	3.08056	0.00443272	3.92732	4.31526	2.66639	2.34187	1.25207	3.12226	2.86109	3.23799	0.00287325	1.2794	1.12926	1.04275	1.30094	1.53073	1.23398	0.0207818	1.13907	1.29237	1.88036	2.09671	0.0357103	0.00769325	2.01248	1.29643	2.01097	3.2877	1.22103	1.15734	0.00136394	1.41344	1.18379	0	0	0.102719	0	3.4008	2.13044	2.15559	0.00224063
ATCOPIA90	1.59883	1.42311	3.29821	1.52914	2.8641	3.07024	2.91752	1.48011	1.537	1.64768	0.122001	0.0810364	1.49814	1.66299	1.49611	1.40345	1.70281	1.68934	1.36467	1.40856	1.34312	1.3116	1.47623	1.64678	1.64547	1.45268	1.5123	1.64946	0.00546591	1.61747	1.64313	1.5394	1.58315	1.94481	0.00703689	1.59994	1.66378	1.49491	1.58468	0.0445821	1.46418	1.63496	1.58484	1.65539	1.48092	4.30045	4.69967	4.55631	2.96783
ATCOPIA93	8.56155	9.81005	8.26085	11.7003	10.4545	7.54636	9.50481	5.1694	11.7725	7.35381	5.38184	5.70069	6.72066	6.91165	8.40685	7.83934	10.3322	10.6856	9.53503	12.3345	5.08579	9.21842	12.5497	11.2195	10.3895	14.1784	7.73206	10.2821	11.3907	10.1802	9.52476	9.98523	9.6971	9.81357	11.2456	10.3919	11.4583	11.565	8.90793	10.0954	8.0074	6.54272	5.974	8.65998	5.63848	10.4026	12.8563	12.3726	12.0563
ATCOPIA97	3.25735	2.97492	4.44345	1.41084	3.24982	3.56424	1.51863	3.01435	1.46851	1.62209	1.35834	1.48449	4.18448	3.99548	1.53315	1.15534	1.48925	3.16482	3.20094	1.55283	2.91233	1.16239	1.42882	3.53082	1.36307	4.05374	1.47486	3.24325	1.51171	1.61478	3.53196	1.2007	2.7734	3.19314	3.17128	3.42265	2.82652	3.19524	3.32961	1.5915	1.44535	3.35672	3.11516	3.43665	2.75914	4.46208	4.83526	5.30611	3.39881
ATDNA12T3A	2.54754	2.3945	4.60345	2.95445	4.54736	4.54827	2.53043	4.90833	3.25446	11.4586	7.22879	7.74219	2.30516	2.49299	2.91014	3.48115	4.57812	3.42579	2.77015	2.76952	4.73637	3.25465	5.35269	2.72542	3.82905	5.19355	4.13843	4.02835	4.38253	2.25569	5.19498	4.60857	2.66684	4.84995	4.01379	4.10073	3.83239	2.16072	2.73391	3.13539	4.19376	3.20089	3.10797	5.88514	6.02979	4.4417	4.74956	4.71598	6.07647
ATDNA1T9A	2.52629	3.66684	2.41822	5.0867	2.5673	3.25578	2.73202	2.7309	2.93729	1.7314	4.45995	4.42014	2.67714	2.99564	6.39823	3.25547	0.921569	4.85829	3.0846	3.51711	3.94857	3.93854	3.68043	1.54507	2.45626	1.33039	5.18596	4.11748	2.4303	3.86735	3.31406	3.25914	2.7703	3.70363	7.30271	3.74774	3.15932	3.33891	3.27497	3.64469	4.73177	3.17601	3.25652	3.63431	3.90827	5.08815	4.79251	4.62302	4.26541
ATDNA2T9A	5.73162	8.15463	10.8217	11.0339	12.1854	5.80538	6.61442	7.22035	8.08504	4.32926	5.59187	6.21448	1.87393	2.93814	10.2148	3.10283	4.35655	9.43701	9.21095	7.00721	8.09655	8.4914	6.40929	1.93407	7.09434	2.12933	5.77824	6.73188	9.9503	8.54445	6.2519	10.3252	6.14458	5.94669	10.5893	4.45794	6.42443	5.48586	6.05055	9.04966	9.21254	7.68995	7.37618	6.94512	8.63349	9.50564	4.7959	5.3626	5.98408
ATDNA2T9B	6.41871	5.69121	6.36319	8.18663	7.22666	9.01936	5.72054	6.19769	7.29891	4.71966	5.3062	4.56099	2.36737	3.87839	5.61641	1.92945	4.63465	7.77054	6.44833	7.86152	8.14636	10.2867	6.1617	2.45373	6.42659	2.04957	5.05361	6.03366	10.1193	6.78164	4.77306	7.51134	5.99074	6.70014	8.25269	5.84546	6.04131	7.19896	6.87976	5.70514	8.49916	6.58318	7.91758	7.47919	8.0644	10.0742	7.37733	8.57127	7.36803
ATDNA2T9C	7.34753	9.86724	8.43048	13.6899	10.0266	9.18856	7.50076	10.43	9.87497	6.20756	8.83771	7.04047	2.15309	4.02051	9.19662	1.53774	5.45493	10.5019	10.1346	9.71384	10.3159	10.2374	6.67144	4.1707	11.9765	2.24015	10.1916	10.2382	10.7346	8.08198	7.60748	11.3393	10.894	7.692	13.4519	9.95922	9.96843	12.846	10.5869	11.4206	13.878	10.7486	10.0803	7.87333	12.3021	11.6332	7.75149	9.55593	9.33643
ATDNAI26T9	3.22658	7.31814	2.05712	2.26147	2.47619	1.23875	3.96339	5.75419	5.68397	1.64289	4.7544	4.2994	2.38266	3.30177	5.90078	1.08461	3.99527	4.45078	3.38609	5.8325	5.99884	5.66043	4.33418	4.17422	6.84863	2.77783	5.00772	4.82905	2.34538	3.68082	3.26466	4.2821	3.16005	3.59435	2.93687	2.59302	4.53885	4.4337	3.47317	5.8612	4.72392	4.69182	2.11406	5.091	4.09988	5.48625	3.99644	4.61125	4.73971
ATDNAI27T9B	9.19772	6.81103	11.2542	8.3917	12.1479	7.54432	5.26605	8.52797	6.08058	4.46442	5.94633	6.28727	2.51384	3.67239	4.74495	5.85678	5.82158	7.69176	5.42719	9.25725	5.12813	4.74362	6.99882	5.84365	8.19516	3.82047	6.82853	7.13144	9.39171	5.19158	4.8565	3.54	4.77037	2.08642	5.50659	7.06724	6.70766	6.79278	3.74638	6.93053	6.14505	4.17693	5.04075	7.72312	8.55491	6.30284	3.63532	4.05493	4.69893
ATDNAI27T9C	5.30007	5.27052	5.056	5.29761	5.39168	2.93248	6.39182	7.65817	5.68554	4.71106	6.38568	5.35888	2.88836	4.20593	6.56803	1.90815	3.78024	3.16741	3.9679	7.45025	6.93477	4.42504	7.23148	3.25859	6.63568	2.09525	4.43589	3.97474	7.53475	3.89833	3.38904	5.88305	3.96678	5.84756	9.7224	6.82399	5.46587	6.06429	4.47169	3.40009	3.95732	4.44472	4.3279	5.54921	6.44696	7.23313	6.03251	5.92808	5.60142
ATENSPM1	7.72342	5.91496	6.68283	9.02454	8.27466	7.02762	9.78879	7.10294	7.74848	5.9752	4.59137	4.81227	6.46316	6.22445	8.04405	10.2318	5.74983	5.74706	7.6491	6.01061	6.27217	4.3877	5.86107	5.12242	4.28019	5.18304	4.74069	7.26737	7.9147	11.4168	12.4376	9.96254	6.7582	6.88972	6.9931	6.38786	5.66796	4.71252	4.62791	9.17232	10.259	7.30267	7.74165	4.78526	8.80199	6.38829	5.4818	6.81277	10.2553
ATENSPM11	8.85651	8.57426	8.5422	7.37707	7.86073	7.73566	9.31216	8.63937	9.21264	7.50256	7.15566	7.60813	7.33432	8.19356	11.0725	8.56921	5.83078	9.03243	8.27988	6.98385	9.30338	6.35592	8.03286	9.92771	5.85767	11.3722	5.65152	10.307	8.25827	7.09181	7.19471	6.78661	7.20773	8.69753	9.54995	7.28999	7.3366	7.09041	11.2029	5.98241	7.15337	10.9666	8.62051	8.48427	8.24671	9.08266	9.40987	8.98207	9.63742
ATENSPM1A	15.2925	13.2585	8.42192	15.8942	9.53729	10.0149	15.41	10.1864	9.45702	15.1707	9.10398	9.97764	26.3446	26.1737	22.6684	20.5506	14.3309	18.2583	21.3599	10.3556	14.7915	12.4841	14.9608	13.8614	13.2482	25.2727	13.1974	11.9437	12.4747	18.853	15.7168	21.9477	19.5044	13.896	19.1488	16.5036	11.7333	12.3365	16.1561	20.8021	10.7436	13.8111	18.925	12.8415	12.5617	16.6016	15.835	14.4633	20.4129
ATENSPM2	12.7316	16.2295	16.6309	13.1348	14.8025	18.3461	17.1324	18.0982	16.8761	16.2854	15.3307	16.4206	19.0042	16.835	16.4152	23.9379	14.7061	17.7573	16.0895	14.1483	13.5415	14.3752	14.4218	14.904	14.7517	14.7418	14.0273	11.6251	13.1249	18.7154	16.6465	15.119	16.6222	17.1785	14.765	16.6475	12.7635	11.1326	14.6397	15.2994	12.5449	17.4984	19.5626	18.6063	17.4318	13.3431	15.6892	15.0724	15.7871
ATENSPM3	12.1201	11.5193	13.2694	15.7477	13.5143	11.0753	11.9813	11.0843	11.3917	16.0873	12.5761	12.8953	12.8897	12.555	12.5852	13.7942	14.6467	10.4368	15.8258	13.4416	10.5119	11.2127	11.842	14.2677	11.4911	13.2311	9.59002	9.65504	14.3006	12.4028	13.8803	12.7187	10.8546	10.8717	11.122	12.4341	9.78977	7.91849	12.1616	15.8555	13.5925	14.6234	13.4468	10.3467	11.2616	10.7012	11.2716	10.8206	12.4295
ATENSPM4	11.3502	12.825	14.9723	12.9898	10.8496	8.80279	8.78204	8.05866	10.0102	12.9222	11.6178	13.0351	11.5353	10.9763	11.3459	9.40484	12.062	8.70284	11.4683	8.11444	12.0066	9.63217	9.38086	11.2425	9.57419	10.6072	8.81835	9.51522	11.1519	11.5751	12.0488	9.00917	10.6262	10.8116	11.1513	9.65562	9.69097	8.34692	10.6168	11.6642	9.52463	10.9846	12.2229	14.1217	12.7223	12.3941	13.8726	13.673	9.38578
ATENSPM5	27.3739	28.046	30.9421	34.8658	34.121	23.9351	25.3371	36.3667	39.2479	21.6204	28.4159	29.1805	36.1438	38.6041	23.3632	27.2141	25.1856	23.118	20.2895	26.27	24.6723	25.3617	26.6199	29.5493	23.2425	18.3082	20.692	20.1728	27.59	27.6266	23.849	25.9824	21.5619	20.9164	19.3604	37.2809	25.067	22.0509	31.5137	28.2631	29.9858	25.6417	26.4051	32.0052	28.1646	21.9005	23.5151	21.2607	17.8118
ATENSPM9	17.8359	18.7525	19.8996	16.4454	19.2166	19.0571	18.8286	21.153	23.5269	12.6008	18.257	18.1747	16.5956	16.9934	14.7808	13.5297	18.4774	13.9913	14.0296	17.1918	10.09	20.0477	12.7225	20.5436	20.7179	18.4754	18.7887	15.7123	18.9172	18.8105	18.3001	14.9293	21.1645	23.6894	20.4445	16.622	19.553	20.9415	20.5034	17.492	19.7129	17.6458	20.8826	21.6468	17.6725	19.8624	21.7075	20.6488	18.3361
ATGP1	59.565	59.2031	62.982	62.505	61.7514	74.8834	73.8245	57.9211	63.7269	82.8786	82.4022	89.1317	102.195	80.2076	73.3542	101.374	82.5803	65.1827	63.8937	58.1594	54.6831	43.1236	63.4475	84.4943	52.2868	78.4173	53.2369	48.0361	66.1672	67.6887	75.5875	61.0523	67.0285	59.3591	42.0627	63.9013	57.2506	58.8901	58.1395	61.7065	59.9394	53.6501	60.4859	59.3348	49.5353	50.6181	68.3456	67.3599	56.3094
ATGP2	36.265	45.8983	64.111	34.2769	49.0071	51.6775	114.863	50.3086	59.391	66.3057	44.83	50.1517	68.6118	54.0312	48.5146	134.923	45.7911	56.3392	58.7973	35.0609	38.9586	27.6452	35.6224	62.4285	35.8485	49.537	32.8302	32.1077	36.703	73.1381	72.3595	57.6175	49.7676	51.55	30.9557	42.7135	41.5434	29.169	35.5412	53.5841	46.9128	44.5032	79.3327	60.6548	41.1703	30.2451	50.0431	45.9172	45.896
ATGP3	27.1517	28.3121	25.8477	22.9754	23.7456	24.8817	25.3677	23.7496	24.0544	38.1345	32.0399	34.7385	32.9642	30.7335	29.696	36.1181	27.9994	28.2249	22.5789	31.9827	30.3095	22.6555	31.192	30.4603	25.263	37.5947	27.0205	27.2086	22.741	23.8729	25.6735	23.8373	31.4494	32.9735	29.1162	27.2561	29.2291	22.6175	22.9402	28.0713	22.7716	37.4785	22.5238	27.6386	32.3802	27.3747	33.7798	35.0203	29.6613
ATGP9B	5.0389	17.1526	4.65109	4.68253	4.08446	3.63102	1.61453	1.5871	2.09914	4.30433	4.36192	4.62689	5.1968	4.96654	1.97482	1.71217	5.18221	0.160542	8.86633	3.72565	3.91702	5.18133	3.23518	3.81821	3.06376	3.43698	3.26212	2.88888	11.0431	2.43461	2.93889	2.95367	3.46694	3.72723	3.644	2.68932	2.83097	2.87313	1.09337	2.44888	2.50804	7.63387	2.00935	2.74066	8.38703	2.18763	2.83098	2.73706	1.53187
ATHAT3	6.87803	8.82676	7.57571	9.72189	7.8891	6.34339	6.04409	6.22326	6.51886	5.71844	5.29047	5.46737	6.55345	7.68015	8.00409	8.20597	6.41825	7.88545	5.16755	6.52019	6.11388	7.22946	5.06197	7.41459	7.91913	5.79753	6.84073	7.10792	10.1096	6.48845	2.80804	5.73577	7.63357	9.99735	5.95821	6.93759	6.40631	6.56813	9.3433	7.56026	7.11498	5.41666	8.10348	7.85639	9.20074	10.5901	9.67756	10.3418	10.388
ATHAT7	9.60666	9.00126	7.50317	8.85259	7.74182	6.64402	8.52491	6.66934	7.36891	9.138	9.31273	9.2211	8.53837	9.81776	7.33292	6.19826	9.31463	9.35393	6.91984	8.58901	8.72598	8.50784	8.82654	10.8869	10.7729	7.52377	8.97872	8.11748	9.79295	10.0934	7.38451	7.08857	7.03323	9.02272	9.7994	8.12794	9.13658	8.96832	8.81104	8.98803	7.79887	10.9845	9.58457	9.67688	6.77383	8.45003	9.13794	9.1939	7.81624
ATHATN10	10.13	11.633	10.5363	11.5571	13.9199	12.992	8.60022	8.60828	8.83456	6.99286	10.1675	8.47074	4.88686	8.36829	10.0335	3.17827	9.86447	10.0638	8.96166	12.0883	11.6972	14.2866	10.9507	7.30143	15.1767	5.27689	11.4102	12.6118	11.9139	8.78578	8.44808	12.3595	11.0499	11.9953	11.5326	11.7917	11.2694	15.0036	13.0896	10.7434	13.2573	8.68601	10.9422	8.20369	11.1613	12.0292	9.14111	8.72086	12.3745
ATHATN6	7.7289	8.9498	8.68189	8.45234	10.8235	6.23007	8.02183	8.48853	6.18328	4.15534	6.5877	5.59304	5.31389	7.29533	7.87332	3.7257	8.40271	5.46656	7.05507	9.49016	10.5034	11.1442	9.88833	6.62421	8.65595	6.23492	8.32904	9.30358	8.08705	8.42708	6.43787	8.26703	6.47156	6.37756	6.3649	8.61257	9.36743	7.53929	7.80195	8.26586	9.34479	5.99111	5.98843	8.65468	6.13917	8.65097	5.93178	4.97842	8.03262
ATHPOGON3	16.0554	19.898	16.355	23.0118	19.7082	22.6332	19.325	18.2851	17.489	10.3869	20.2631	15.4523	4.79924	11.1012	13.8359	2.31119	11.6326	19.6438	18.6677	19.4801	20.8085	31.3531	18.9299	9.49917	26.2265	4.86455	19.7257	23.4806	21.7422	13.0139	13.3255	27.4036	24.3812	19.662	26.3806	20.7997	21.0225	24.7704	20.8961	20.0352	26.3874	20.178	20.5742	13.6229	28.2167	29.97	13.1707	19.0023	17.5008
ATIS112A	10.6009	9.64449	11.3868	15.1409	11.8411	10.1652	9.70871	9.18352	13.0172	11.4207	9.09173	9.81489	10.0102	11.0156	12.3373	11.078	12.561	9.48249	11.3675	9.9336	8.63407	9.97627	8.62788	10.1762	10.9432	11.7386	13.9385	14.8577	13.7253	11.9932	11.7107	11.3142	10.4905	10.4639	12.9457	10.2507	10.0648	10.177	8.13728	13.303	10.2621	10.6203	10.8981	13.6302	14.1503	14.4183	13.0517	14.6929	12.3933
ATLANTYS1	42.6286	38.2319	37.3301	34.8805	30.9171	33.098	50.578	37.3964	38.9766	46.6308	42.1903	45.9577	54.7783	41.4249	44.6746	60.2683	55.4649	30.2448	46.0646	37.8684	34.5957	31.623	39.849	54.6277	33.4174	59.9257	40.5227	34.826	41.5855	47.3431	42.3776	35.443	39.5315	40.2116	31.3764	36.9145	38.8512	36.2341	36.8371	33.2526	29.8785	39.6388	33.9976	43.8494	33.154	29.2998	37.7926	38.1892	37.3489
ATLANTYS2	40.2058	40.5827	44.1124	30.2527	36.1751	39.3929	49.0027	45.8953	46.29	45.0629	41.8369	46.2488	54.6624	42.6481	47.4171	62.2154	42.8761	41.549	34.8208	42.0075	46.2634	36.7525	41.4271	49.2677	34.3705	61.0408	34.1849	34.1587	33.6808	37.2063	33.1894	39.2102	51.3972	46.0339	30.0571	41.2085	41.3047	41.6229	40.152	43.995	35.8862	39.1188	42.4317	47.6811	32.1891	33.7257	45.3409	44.5882	37.745
ATLINE1_1	6.63958	9.39625	9.26351	6.83822	7.84768	11.1461	11.5826	11.9545	8.53718	9.89414	8.76725	9.24817	10.431	9.36883	9.77804	17.3397	6.68506	8.69136	8.34403	5.64518	6.24947	5.79753	7.79545	8.47018	6.1933	10.5364	6.56699	8.60454	10.7113	10.3203	10.038	10.1701	11.564	9.65656	7.6293	7.83833	8.86152	5.67184	5.61031	9.38242	8.44367	10.4752	9.76764	12.3337	9.33298	8.80271	10.6611	11.8839	9.59451
ATLINE1_2	7.6095	6.25843	8.84355	6.99847	5.91123	6.82926	8.00742	5.72154	7.52734	9.0555	5.45935	6.20517	7.76122	6.83679	6.85002	11.6043	8.35061	6.89079	6.74315	6.02147	7.49913	4.91862	7.89122	7.43452	6.81506	9.46841	5.58571	6.34517	7.06751	7.5169	8.24724	6.49635	8.90406	8.54112	6.40059	8.58872	8.03794	7.65776	5.72266	6.89055	6.14384	7.40212	11.8449	7.72275	7.52784	5.56528	6.20126	6.53031	5.74605
ATLINE1_5	3.19628	3.05818	3.24048	2.63356	2.61483	3.28661	1.50878	2.53907	2.81066	3.17773	2.79254	3.10396	3.57015	3.41103	2.89004	4.40197	2.97278	2.59869	2.44623	2.80211	2.73635	2.51773	2.82106	3.32794	2.93826	3.6834	2.53355	2.90943	2.56601	2.91743	2.78248	2.68524	2.73155	2.88372	2.67138	3.03803	2.66176	2.71422	2.64685	2.97425	2.90838	2.94699	1.47248	3.12871	2.82331	3.16488	3.38756	3.73598	2.5885
ATLINE1A	31.7458	34.4391	35.0202	33.3709	32.0995	32.7518	30.6037	36.1432	34.4441	32.9524	32.7181	33.5667	30.8824	35.2	37.793	31.4171	31.0411	32.7254	33.0665	30.4661	31.9868	33.114	31.3201	36.0906	35.8811	29.8948	32.5953	33.9381	34.7011	33.6615	33.55	29.3002	29.4561	34.7701	41.3742	30.567	33.1855	32.5836	32.4013	32.4591	30.2408	33.7461	34.5764	34.5861	36.5473	28.2027	30.197	26.1483	24.4213
ATLINE2	15.2191	14.866	17.4162	16.3135	15.6293	18.2643	14.4845	16.5329	16.7044	14.0079	11.8518	12.973	19.6498	19.3256	16.9217	12.9191	14.1066	17.0496	12.3457	14.1832	14.0225	13.2964	14.585	15.6116	13.17	15.5749	13.1717	13.8169	11.7646	10.9542	13.5647	13.5212	18.6644	16.8092	15.4566	16.4224	13.2667	13.5434	14.0663	17.7715	14.4313	14.9713	14.8158	16.3832	13.4649	12.8572	15.2013	14.7282	13.2277
ATLINEIII	26.0234	31.4671	26.8843	25.171	24.7897	20.9065	24.7423	22.0163	26.0029	25.8331	22.4356	25.0541	24.1444	25.641	22.4957	29.9377	22.2056	23.0608	24.4986	21.8405	21.8993	20.7128	20.1198	30.3056	27.2139	26.0011	26.6607	26.1015	21.2693	21.297	26.0794	21.0334	23.3696	22.6179	21.9501	15.6571	25.8684	24.7545	16.1491	22.8271	24.0675	26.0482	28.5191	24.7925	24.1285	23.7501	24.9076	25.4879	21.5891
ATMU1	4.23275	3.21574	5.11737	4.27177	4.74791	5.42422	5.00493	7.88511	4.00439	3.69439	5.15874	5.43211	6.76811	6.42063	5.46097	10.682	6.50938	5.08546	3.0213	3.26879	2.91721	2.94845	3.70806	3.89053	4.06501	4.46482	3.60257	4.21709	4.66297	5.10315	5.03027	5.3742	4.95422	5.37537	4.83356	3.7064	4.68558	4.98703	5.36846	5.29118	5.84322	4.84805	4.99292	6.79711	6.28024	4.96937	5.48466	5.85698	5.66305
ATMU10	0.00353845	0.00920816	1.76579	1.36928	1.72677	1.90431	3.67131	3.19143	3.47579	3.56316	1.86652	2.06326	4.50019	4.09862	3.5708	2.3794	0.00901609	0.0122927	1.50949	0.00705112	0.00316831	0.0135244	0.00544116	0.00691352	0.00622586	0.0101437	0.00185167	1.85383	3.21827	1.74387	1.8418	1.67147	1.60307	3.52578	1.62223	3.43702	0.00883919	0.00399262	1.62664	3.32445	3.0427	1.65459	1.48072	1.98846	1.53386	2.6198	1.64684	1.71656	0.0320653
ATMU2	1.50488	1.46178	1.35961	1.39707	1.03127	1.20577	1.36126	1.51288	0.0124023	1.54544	1.56397	1.50715	1.7631	1.73801	0.0142756	1.60091	1.56757	1.40146	1.01834	1.20114	1.13067	1.0025	1.1107	1.74478	1.56326	1.56958	1.38033	1.69798	1.15765	1.32471	1.34742	2.53678	1.59407	0.0119766	1.56075	1.39009	1.4228	1.35236	1.49295	1.63173	1.50801	0.0682868	3.11742	0.702343	1.0549	0.0778114	3.03975	3.16971	2.95753
ATMU3	5.21054	4.52657	5.42004	3.42517	3.02818	2.81446	5.96483	6.44249	4.70673	2.86004	3.21019	3.49701	3.22331	3.44202	1.37667	3.24143	4.94373	3.02324	3.0384	4.34941	4.89663	4.19781	3.1346	4.72801	4.55749	5.75996	5.11111	5.58027	5.87426	3.65492	5.28685	3.20913	2.71865	3.11381	4.96851	3.18453	6.0912	4.50504	3.3802	3.63309	3.58061	1.8053	2.82487	3.43342	6.1953	4.41499	3.1333	2.8857	4.87218
ATMU3N1	8.05202	8.44113	9.76758	11.8909	8.99323	8.61552	6.80746	7.10736	9.53613	7.47484	9.42356	11.9846	5.69503	6.37751	11.3856	4.66	7.51489	10.2632	8.39294	11.0512	12.1283	12.3231	9.21004	5.51586	8.478	5.75036	10.5305	6.35353	7.41844	7.87171	7.07738	6.4446	10.3911	11.5653	9.6787	11.3293	7.43275	7.08472	8.79496	7.47774	8.36877	6.28786	10.1736	6.34647	8.89495	8.94619	6.97581	9.09554	10.0968
ATMU4	1.94245	1.70079	2.46573	0.805195	2.98365	2.96759	1.54328	1.7923	0.00257365	0.751181	0.0227722	0.000484743	0.00497188	0	0.00253772	3.84003	5.34545	2.96979	1.59151	1.51436	1.41113	1.42863	2.08266	4.34342	5.37169	4.53933	5.07488	5.70199	0.00248923	1.60417	0.0464451	1.54149	0.0309353	0.00430256	0.00229519	1.46969	1.47102	4.71937	3.22523	0.00116756	0.00351846	2.24244	2.32869	2.07025	2.37855	2.98397	3.24474	3.47634	3.61007
ATMU6	1.41052	1.37715	1.38923	1.26429	1.28036	1.03249	1.22581	1.22968	1.35506	1.32081	1.33183	1.48925	1.49811	1.52984	1.58181	1.11479	1.30811	1.52088	1.11977	1.39562	1.38276	1.29013	1.27646	1.35353	1.46256	1.37287	1.28229	1.47739	1.40581	1.46101	1.4007	1.31649	1.28756	1.34623	1.52651	1.40566	1.41187	1.31248	1.39376	1.18452	1.07282	1.4634	1.51056	1.54941	1.37994	1.39809	1.35946	1.36158	1.25049
ATMU6N1	7.13392	7.04788	5.62967	8.38597	5.4316	7.50673	5.73169	4.95137	5.6643	4.49201	4.13628	4.4761	5.32279	6.62789	4.05127	3.8924	5.52427	5.95431	5.57901	6.05005	5.10725	6.85086	4.47532	5.96519	7.08168	5.51322	5.98797	6.97563	6.07814	5.07137	7.05062	4.28417	4.87726	5.35935	7.51426	4.16656	4.09341	4.0249	6.22177	5.93115	5.78151	5.51827	5.6954	6.41135	6.12858	7.95462	5.93976	5.85077	3.25836
ATMU7	0.0163495	0.0179584	1.27507	0.0185515	1.13754	0.0183375	0.0279359	0.881407	1.19425	2.81929	1.22322	1.55919	3.48739	3.20307	0.0284443	0.00156013	0.0162268	0.00928633	0.0139975	0.0114233	0.0232764	0.0222522	0.00897672	0.0157155	0.0199297	2.00614	1.76261	0.0158332	2.25154	2.49046	0.0581432	0.0170887	1.33996	1.4351	0.0110944	0.00598007	1.20921	0.0130715	2.43687	0.824819	0.0488664	1.31688	1.14759	0.0128534	0.0164014	1.26996	1.04112	1.00076	0.0177125
ATRE1	0	0	0.0106486	0.00106079	0.00382994	2.41935	4.68214	4.39188	2.38369	0.00954261	0.00216944	0.00169178	3.05956	2.79735	0.00360975	3.56459	0.001973	2.2542	6.13093	0	0.00837003	0.00404671	0.00237825	0	0.0011469	0.0109758	0.0145834	0.000367436	0.00634922	0.000728038	0.00274555	0.00484087	0.0300189	0.0170456	1.61577	2.52656	1.9394	0.00562738	1.94802	2.41749	2.31314	3.97605	0	0.0182509	0.00214298	0.000655033	0.0133901	0.0370573	2.16855
ATTIR16T3A	21.8622	26.8079	24.8457	34.0101	30.3346	22.4659	21.5149	21.4504	18.8173	10.0996	24.6728	19.3484	4.74305	11.548	25.7543	2.24886	14.5498	23.4049	32.1923	30.1674	31.3047	33.89	21.7523	9.26401	29.0832	5.76719	29.9258	31.2505	28.4329	19.0215	18.9151	24.7112	23.3374	21.0529	35.175	22.4525	26.2287	31.2152	24.0011	26.959	32.2006	26.3827	29.396	19.9373	33.7499	37.1082	19.5838	25.1983	22.8516
BOMZH1	12.9945	11.6649	13.5294	16.2042	17.0949	15.5891	14.8096	13.3768	15.6077	8.53724	12.0212	11.9781	6.40283	10.6019	18.6462	8.21617	9.90192	13.9926	14.484	14.7447	14.5933	16.2843	11.8056	8.66949	16.9945	6.97945	14.2998	15.1885	14.2086	13.703	13.8176	13.2314	12.6701	14.43	18.5254	14.0717	13.9236	16.4962	17.4748	10.5598	12.7458	15.4863	14.8056	13.9749	15.0508	15.3591	13.9916	15.3377	15.4217
BRODYAGA1	13.1793	15.6742	13.3529	17.5458	16.0281	12.6918	13.501	17.7493	15.327	10.7589	15.6637	13.298	6.75672	11.2694	13.6685	5.00253	9.91801	16.7041	15.7944	15.9662	18.5327	24.0347	14.8997	8.75138	18.5457	6.16774	16.4406	16.7026	15.7373	11.9954	11.4417	17.65	14.4477	15.3793	18.462	15.8936	14.0803	16.671	14.219	14.2019	18.2735	16.0061	16.292	10.5542	17.9069	20.489	10.4283	14.2219	12.6074
BRODYAGA1A	19.8378	21.1487	17.8957	25.0141	21.5969	19.5464	17.2777	19.2276	18.0591	11.4793	16.9061	15.8851	9.81492	16.2524	18.6224	7.58136	12.432	26.0873	20.6523	26.0304	25.7541	27.6796	19.2149	13.2788	21.8774	13.133	22.1957	24.9561	21.0083	18.3022	15.7555	22.5197	22.1251	22.6903	26.0778	21.7609	20.2618	23.0893	19.8386	19.426	24.3598	21.9063	22.1284	18.2214	25.3439	27.7989	18.1867	20.6868	17.5667
ENDOVIR1	2.04739	3.08079	5.71343	4.81056	5.381	8.38261	6.29213	3.97577	5.41958	6.0698	5.14959	5.46508	7.44964	6.80729	2.04717	4.56873	3.50871	4.68462	6.93727	3.15498	2.88233	1.87495	3.55078	1.83869	1.60828	20.9881	15.281	10.6805	4.06891	7.00609	3.6145	4.10151	2.24218	7.24992	2.85323	3.5161	3.52739	3.18444	5.52593	3.13737	2.98039	3.94211	2.73265	1.68953	7.54219	6.79049	7.52784	7.64654	10.6854
HARBINGER	1.49046	1.47486	4.19708	4.38024	4.26787	2.86084	1.33628	1.40821	0.036962	2.25625	2.60989	2.65829	2.2629	2.39765	3.633	0.114822	4.17098	2.76434	2.0948	3.31922	4.43047	3.49479	3.85892	2.27426	1.26025	2.06938	2.52681	3.86562	1.30341	1.3099	2.92585	2.5249	3.71643	4.1632	3.4106	2.77042	3.01292	3.98723	1.18957	0.0370069	1.15128	0.52205	0.0489893	6.63784	3.76375	1.45087	3.24977	1.41429	1.41765
META1	18.4573	20.3741	22.6064	32.6552	26.5679	25.987	11.7691	22.5762	18.752	11.2947	23.3094	19.1612	10.3961	15.6133	23.5601	6.95331	18.896	16.2484	18.3815	21.2522	27.4453	33.2483	24.8095	12.1237	22.0366	9.5134	22.7251	24.3379	26.5056	25.6789	17.263	18.7122	20.1894	19.8972	24.7189	23.0741	25.3662	22.6721	22.8109	18.2235	20.109	23.3237	18.5782	18.6887	23.9477	20.5781	17.382	15.5711	21.2289
SIMPLEGUY1	27.878	29.9919	35.4725	33.0517	33.3648	30.1753	31.3732	28.8395	30.4629	24.6509	29.643	33.0011	21.0202	28.1498	32.09	30.4751	20.4385	34.7488	39.2106	34.3887	33.0788	38.7147	27.866	22.5906	33.0896	21.2649	32.613	30.0981	32.4653	28.3885	28.1667	34.3407	30.895	35.794	36.9632	31.1256	31.2867	31.9256	24.9575	33.7628	38.3072	35.3099	31.0312	30.7426	41.6451	39.1812	25.2874	34.4875	33.2436
SIMPLEHAT1	15.3735	13.3931	13.9047	13.142	11.9927	8.38914	10.5177	10.9139	10.3819	11.1237	11.2714	13.2545	12.0304	14.8833	11.0784	16.4431	7.38788	14.301	13.4143	12.797	13.8473	15.8161	9.32863	12.3583	14.1188	11.6591	11.4722	11.8264	12.5443	11.5042	9.9716	14.2549	11.5853	11.8007	15.119	10.1578	14.115	12.4335	9.82474	13.5206	15.9776	12.3644	11.2983	15.3524	12.8472	12.4337	7.32264	11.3161	7.7563
SIMPLEHAT2	14.8388	15.914	12.2428	12.6952	10.6761	15.557	11.6417	17.4427	15.4668	11.8469	10.9115	12.2483	9.90339	12.5465	12.5765	13.5382	8.43196	14.4653	15.4109	16.5395	14.7515	19.8558	10.6658	13.7893	17.7615	10.089	14.3621	13.4349	13.5874	11.4051	11.4385	13.0602	10.5902	13.5763	12.0257	10.4571	12.8602	15.3105	11.1031	14.6044	15.8507	11.0618	12.2569	12.0525	17.2253	15.7824	9.76473	12.884	9.84697
TA1-2	3.4434	3.09748	1.56281	3.60917	1.63134	1.73936	4.60104	2.55145	1.72613	0	3.24167	3.3715	2.4516	2.21335	4.47368	3.39156	3.50479	1.9011	4.10968	3.07186	3.07835	2.6061	3.32179	4.04068	3.26309	4.20917	3.36586	3.38828	4.03178	4.34445	4.44479	3.79316	5.04538	4.69459	3.29104	1.85085	3.03726	3.02236	1.9054	4.47329	3.84039	1.83713	3.04306	2.04471	1.04293	1.66552	4.87438	2.16981	1.77657
TA1_AT	3.67262	3.57973	2.70595	3.00912	1.13732	2.6482	2.29503	2.79075	2.31935	3.85547	3.54405	3.61623	3.79216	4.22292	3.62085	1.94333	4.27433	2.98833	3.13038	3.26401	3.2548	3.98014	3.28298	5.55583	3.91268	5.69505	4.69554	3.76807	2.72297	3.11021	2.37336	2.25019	2.33607	2.60834	4.06708	3.94638	2.97053	3.06691	3.52636	1.78136	1.96712	3.71476	2.97686	2.73776	2.76794	2.16982	2.80344	2.7088	2.56168
TAG2	3.4882	7.45331	2.79434	6.31766	2.40045	2.69901	2.27092	5.5538	6.77705	1.53769	1.83515	1.72646	1.9649	2.24247	5.46298	3.57843	1.57107	5.83625	4.09284	1.47704	2.29444	3.29231	2.02799	0.439805	2.75316	2.64907	2.17932	3.67207	7.12848	4.83172	3.93915	3.05197	6.60599	8.00451	3.39819	3.44527	0.771201	0.90947	3.11945	7.56573	7.64031	3.68101	2.66157	4.73784	6.14994	5.90742	5.97089	4.34656	4.36924
TSCL	13.503	13.372	16.0784	9.74015	16.2829	12.3188	13.203	13.9961	10.8469	14.0612	10.9586	11.7175	13.7846	11.528	14.315	23.5387	13.1912	16.6589	13.7409	10.7985	10.387	9.23252	11.2183	16.7555	9.30239	14.0431	10.3761	11.0286	15.9418	12.8711	16.3073	15.0942	12.873	11.5989	10.7458	11.8683	14.5373	11.8213	10.2182	11.7377	10.8616	9.50017	11.9427	16.8956	13.7875	13.2361	14.5302	15.248	10.7891
VANDAL1	8.25813	9.43702	7.52356	5.61356	7.31243	10.3073	15.3337	8.12383	11.8425	9.33017	11.2972	12.0012	12.2174	12.1565	11.1786	20.4508	11.961	15.9665	12.4215	9.23635	11.9335	15.8942	14.8236	7.83524	11.5439	20.9616	12.9931	8.8344	9.15558	14.498	8.91691	10.6537	10.668	11.9282	13.0424	11.3195	4.61501	6.35736	9.19415	9.9612	8.08661	12.5832	12.4557	9.96148	8.64117	15.1469	18.0328	15.8948	13.7271
VANDAL11	1.35152	1.36492	1.58033	1.13052	1.11542	1.3546	1.11808	1.2281	1.31059	1.25049	1.24335	1.20884	1.48605	1.56399	1.29845	1.65312	1.41607	1.30884	1.07536	1.3043	1.19318	1.26093	1.37893	1.46481	1.36625	1.32115	1.20046	1.18459	1.15693	1.30091	1.22683	1.22951	1.41421	1.43042	1.23385	1.26847	1.27475	1.26848	1.21701	1.25066	1.16538	1.23217	1.28911	1.26502	1.35523	1.1269	1.23849	1.28285	1.20777
VANDAL13	3.80522	3.37495	3.27214	0.154603	2.14807	3.24019	5.00521	2.72993	0.0105126	1.45223	1.59542	1.63356	2.55131	2.27213	2.33622	4.39701	3.76817	3.60242	1.02047	1.43314	1.46546	1.72938	1.99558	4.79325	2.09341	3.92051	1.95596	1.87879	2.45575	3.32491	0.869129	4.75185	3.79224	3.94221	2.11529	0.690292	4.34555	3.29838	0.290032	2.22191	1.48457	0.0303023	1.52808	2.13042	0.20002	2.50319	2.87736	2.53656	2.49243
VANDAL14	6.41153	7.07235	0.550978	1.91773	1.87535	4.26295	1.86347	3.97018	2.00272	3.42297	5.5738	5.52726	1.69718	1.89944	2.24751	7.05937	1.9308	2.14182	3.50844	1.88986	2.14375	4.70669	1.94328	3.78008	1.72079	3.36056	1.87454	3.19389	9.68421	2.28512	4.74141	3.09642	5.8408	2.89629	5.98611	1.95445	1.78405	5.46972	9.90331	1.07944	2.12001	2.99942	2.04077	5.18577	3.79685	0.0119733	0.0312411	0.0846937	1.6054
VANDAL16	6.16854	5.9408	7.72967	9.47929	7.48015	6.2573	9.043	7.85576	8.71548	8.04105	17.5416	18.1723	8.9214	8.48252	7.69787	10.4359	6.85037	8.13319	6.5918	11.4726	12.6271	16.2736	15.7576	7.09084	5.20075	8.09341	6.04067	6.28678	5.95334	6.33824	6.6181	5.93165	5.81689	5.70636	4.87996	7.00197	5.77642	5.87105	9.21482	7.66864	7.96855	5.75777	8.2463	7.61308	3.47933	4.72325	5.683	5.64299	7.7599
VANDAL17	11.5794	8.23331	9.7204	8.89796	6.63066	9.49421	7.13104	12.2772	11.7741	9.43514	7.54713	7.42166	7.43978	7.92264	6.13317	4.39576	9.41015	7.50645	4.43878	9.09963	8.76473	10.7681	10.3458	9.75531	9.7954	4.09859	8.54289	10.617	9.00351	7.07726	9.06436	12.963	8.10802	10.4557	11.1456	6.60804	9.1683	8.47773	7.15104	4.9873	6.30046	8.04869	8.51141	7.18433	8.29223	7.54893	6.12848	7.80526	4.85712
VANDAL1N1	10.0263	8.28788	12.3447	10.3744	12.791	11.7655	10.3712	10.1805	10.9999	6.53387	10.0299	9.38807	3.25474	4.29481	8.36731	2.98123	8.19399	10.7982	8.71816	7.19189	6.626	12.6896	8.34584	5.35488	9.26249	3.70386	8.34789	7.60773	12.9446	7.06958	6.14924	10.7182	9.65182	10.6982	7.1716	8.93923	7.84101	10.252	8.00676	7.57524	8.96115	9.23233	8.56342	6.45573	11.2177	10.2725	7.74363	5.85247	7.91116
VANDAL20	6.65464	6.25821	4.74977	7.52738	5.2666	7.15416	7.93507	5.98233	5.94711	7.25021	5.72723	5.79779	6.73944	6.42142	6.76797	9.70369	8.2866	5.14274	6.22246	5.12757	5.15451	6.84758	7.84121	8.65641	7.32154	4.98553	7.53182	4.5362	5.4981	6.88759	5.68749	4.20937	5.61192	5.56192	6.19839	6.00337	5.8817	6.08024	5.36549	6.79782	7.57737	7.1326	8.592	6.16068	5.35693	4.89206	6.80678	6.61123	6.83373
VANDAL21	24.8985	25.2989	29.4639	31.3377	31.0461	23.7235	28.1919	31.0433	28.6552	23.414	21.1912	21.6033	29.8912	30.091	26.4775	27.4655	23.8113	23.629	26.8577	22.682	21.8909	24.5799	24.7329	25.619	21.4041	22.3442	23.7794	24.2135	27.5606	30.023	25.4086	21.9687	26.1648	26.9222	22.2484	27.0476	26.2895	27.0487	28.4408	27.4381	26.7462	28.7303	25.1645	30.0196	17.7862	26.2428	27.5961	26.7939	21.6167
VANDAL22	3.34593	3.1614	3.40561	3.07243	2.99769	3.75596	3.44644	3.47679	2.86574	3.41648	3.26431	3.3647	3.0538	3.14692	2.68735	3.46293	3.43904	3.18598	3.04596	3.23922	2.78762	2.88442	3.0243	3.13052	3.03022	3.80922	2.99269	3.26277	2.57124	3.18388	2.99706	3.12832	3.08279	3.04676	3.37265	2.8903	3.72851	2.71418	3.07466	3.39464	2.68953	3.35439	3.02494	3.03415	2.5796	2.87995	3.11347	3.02218	2.96111
VANDAL2N1	18.6555	19.2721	18.4267	18.7533	18.6961	19.9483	19.1503	19.8205	25.1753	16.9091	18.3564	18.799	17.8558	19.0698	16.2051	15.1807	21.6449	18.2417	18.832	16.5442	14.7851	18.4235	18.9608	21.0059	20.4011	15.1729	12.5795	14.4443	17.7358	16.9287	18.5956	18.8503	20.5702	22.1931	19.8891	18.6977	22.424	16.4964	19.3063	17.9633	21.0831	18.3002	21.5947	15.2115	19.1642	20.3743	16.5724	16.1495	25.7291
VANDAL3	24.5814	19.679	12.1335	14.4583	17.3603	18.2542	17.059	18.5809	19.0423	18.1209	17.6225	17.9489	17.541	16.8546	13.9992	18.9996	22.7396	12.4805	13.2248	17.5983	13.7716	13.944	16.9171	20.629	16.3636	20.7815	14.8373	17.7413	16.3856	14.3032	18.1428	14.0664	16.0497	18.4781	15.4709	16.1232	18.4603	16.3072	16.7055	14.2742	11.1892	19.2821	15.1976	16.7226	17.8254	22.4854	16.3047	18.6651	16.0982
VANDAL5	4.41156	5.31095	3.96055	5.51608	4.02292	5.58455	5.60453	4.79339	4.73311	5.38245	3.58827	3.60807	5.61915	6.46291	4.30969	4.04897	4.16071	5.23156	5.52038	3.3692	3.03082	3.55895	3.61788	5.05102	5.79322	3.80506	4.49288	4.53793	4.04079	6.17851	4.59198	4.3006	3.78866	3.85343	5.04266	4.89686	4.32088	4.65276	4.28902	5.82432	5.73097	3.30494	4.63726	3.54495	5.67917	5.81941	5.26905	4.93521	4.58716
VANDAL6	11.2964	11.5318	18.2213	15.7876	18.5105	14.6716	12.8242	17.6529	13.1094	24.1894	10.9628	11.373	15.22	16.0459	14.3668	21.6595	14.2551	8.73767	12.8713	10.5758	13.8984	12.7791	13.2433	11.3595	11.4485	11.2587	15.0752	15.9955	17.2013	15.6641	6.4766	14.9565	13.1263	13.3064	10.1769	11.5067	10.6197	13.4469	15.8109	7.48541	8.66614	14.1562	8.80225	21.6552	17.5613	13.8361	15.8254	13.685	12.7754
[truncated: 131 more columns]
