# Supplementary material for: The Arabidopsis thaliana mobilome and its impact at the species level
Source: eLife journal article supplement (doi:10.7554/elife.15716), 2016-06-03
Supplement: supp [file elife-15716-supp-v1.zip › elife_poa_e15716_Supplementary_File_1.pdf]

## Supplementary file 1. GWAS results for CNV

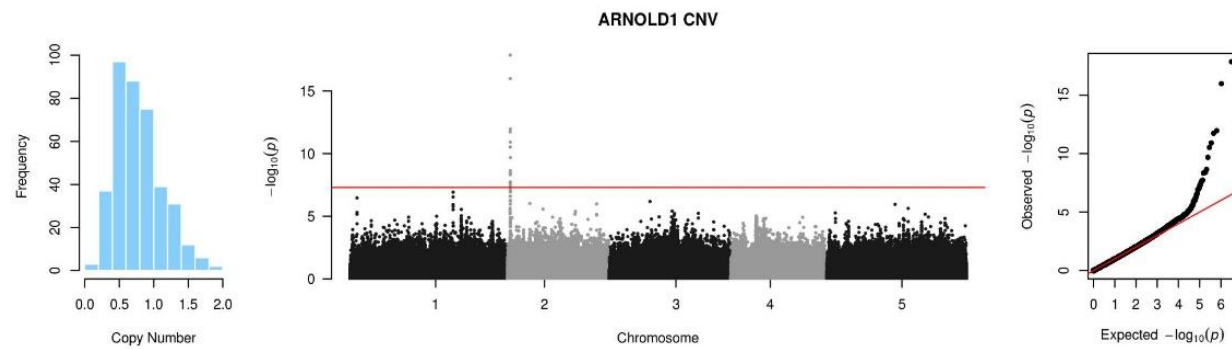

| TE      | GWAS associated interval | Leading SNP | Type of association | P-value  |           |          | MAF   | Candidate gene(s) |
|---------|--------------------------|-------------|---------------------|----------|-----------|----------|-------|-------------------|
|         |                          |             |                     | Joined   | Worldwide | Sweden   |       |                   |
| ARNOLD1 | Chr2:550102-595539       | Chr2-560680 | C/S                 | 1.39E-18 | 2.51E-09  | 1.69E-08 | 0.077 |                   |

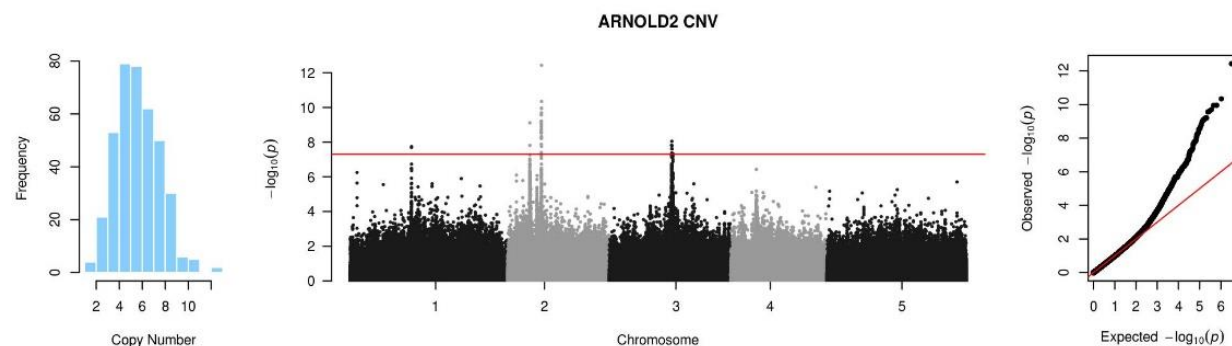

| TE      | GWAS associated interval | Leading SNP   | Type of association | P-value  |           |          | MAF   | Candidate gene(s)                                     |
|---------|--------------------------|---------------|---------------------|----------|-----------|----------|-------|-------------------------------------------------------|
|         |                          |               |                     | Joined   | Worldwide | Sweden   |       |                                                       |
| ARNOLD2 | Chr1:11886940-11900534   | Chr1-11886941 | C/S                 | 2.02E-08 | 6.12E-05  | 2.78E-05 | 0.218 |                                                       |
| ARNOLD2 | Chr2:4360249-4361088     | Chr2-4360250  | TRANS               | 7.77E-10 | 3.68E-07  | 3.57E-05 | 0.269 | AT2G11010, AT2G11015                                  |
| ARNOLD2 | Chr2:6531910-6609313     | Chr2-6557527  | C/S                 | 1.66E-09 | 4.30E-03  | 5.10E-05 | 0.150 |                                                       |
| ARNOLD2 | Chr3:12047135-12123371   | Chr3-12098457 | TRANS               | 8.96E-09 | 9.98E-06  | 1.04E-04 | 0.474 | AT3G30430, AT3G30456, AT3G30460, AT3G30520, AT3G30530 |

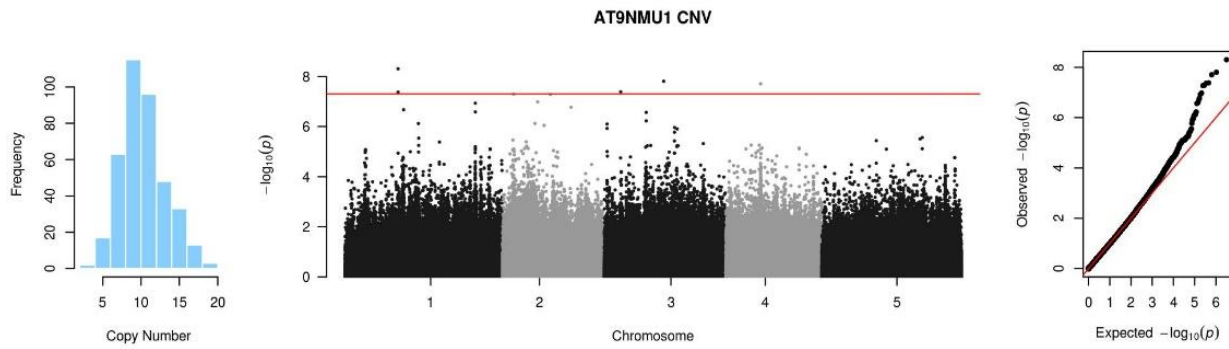

| TE      | GWAS associated interval | Leading SNP   | Type of association | P-value  |           |          | MAF   | Candidate gene(s)                                                                      |
|---------|--------------------------|---------------|---------------------|----------|-----------|----------|-------|----------------------------------------------------------------------------------------|
|         |                          |               |                     | Joined   | Worldwide | Sweden   |       |                                                                                        |
| AT9NMU1 | Chr1:10280547-10280549   | Chr1-10280548 | TRANS               | 4.97E-09 | 2.99E-07  | NA       | 0.344 | AT1G29350, AT1G29355, AT1G29357, AT1G29370, AT1G29380, AT1G29390, AT1G29395, AT1G29400 |
| AT9NMU1 | Chr3:11495299-11495301   | Chr3-11495300 | TRANS               | 1.56E-08 | 1.85E-08  | NA       | 0.228 | AT3G29644                                                                              |
| AT9NMU1 | Chr4:6766764-6766766     | Chr4-6766765  | TRANS               | 1.97E-08 | 3.96E-05  | 1.24E-04 | 0.146 | AT4G11070                                                                              |

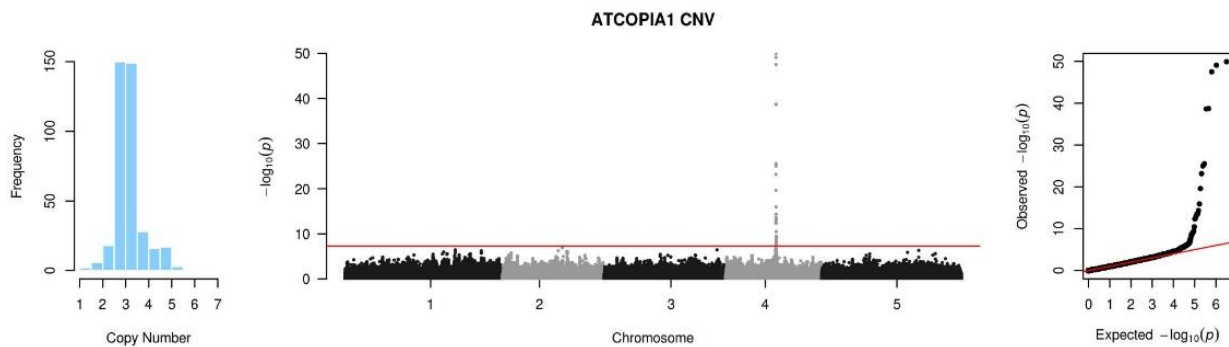

| TE       | GWAS associated interval | Leading SNP  | Type of association | P-value  |           |          | MAF   | Candidate gene(s) |
|----------|--------------------------|--------------|---------------------|----------|-----------|----------|-------|-------------------|
|          |                          |              |                     | Joined   | Worldwide | Sweden   |       |                   |
| ATCOPIA1 | Chr4:9712617-9782935     | Chr4-9733104 | CIS                 | 7.70E-50 | 2.24E-24  | 8.83E-29 | 0.095 |                   |

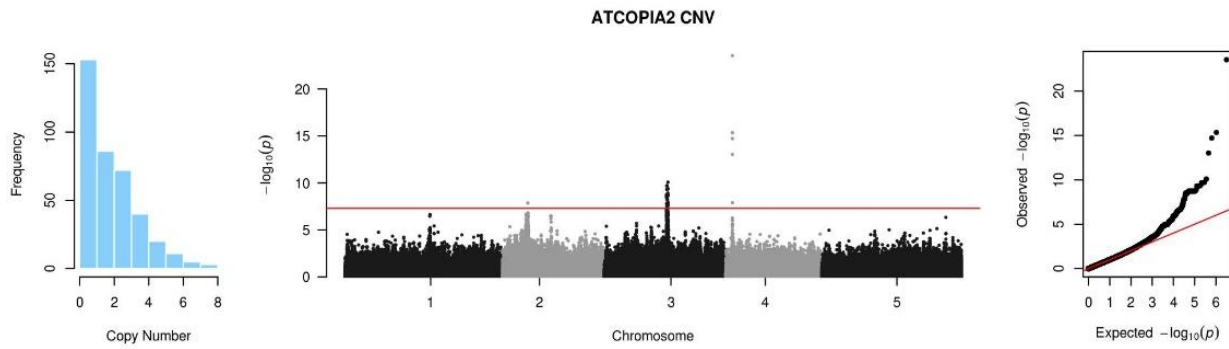

| TE       | GWAS associated interval | Leading SNP   | Type of association | P-value  |           |          | MAF   | Candidate gene(s) |
|----------|--------------------------|---------------|---------------------|----------|-----------|----------|-------|-------------------|
|          |                          |               |                     | Joined   | Worldwide | Sweden   |       |                   |
| ATCOPIA2 | Chr2:4934115-4934117     | Chr2-4934116  | TRANS               | 1.37E-08 | 1.66E-03  | 2.49E-08 | 0.254 | AT2G12290         |
| ATCOPIA2 | Chr3:12010819-12354238   | Chr3-12315559 | CIS                 | 8.18E-11 | 7.97E-09  | NA       | 0.118 |                   |
| ATCOPIA2 | Chr4:1313271-1317155     | Chr4-1316584  | CIS                 | 2.86E-24 | 2.51E-11  | 3.49E-18 | 0.485 |                   |

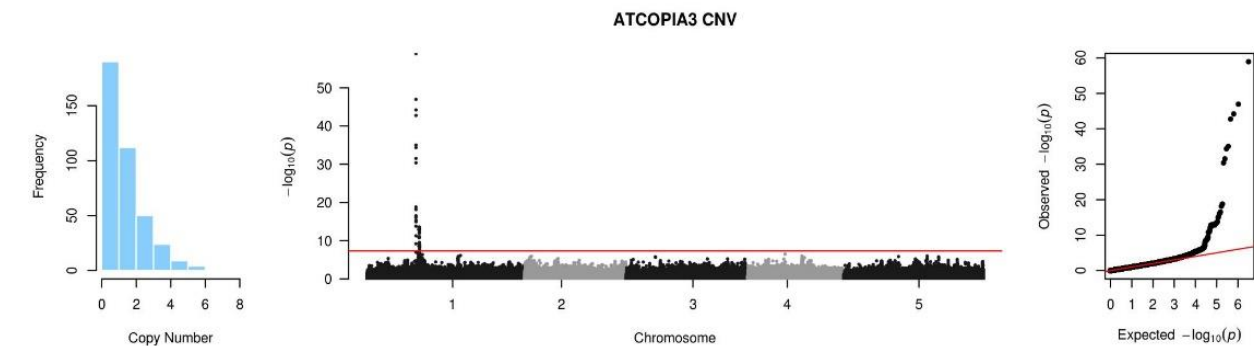

| TE       | GWAS associated interval | Leading SNP   | Type of association | P-value  |           |          | MAF   | Candidate gene(s) |
|----------|--------------------------|---------------|---------------------|----------|-----------|----------|-------|-------------------|
|          |                          |               |                     | Joined   | Worldwide | Sweden   |       |                   |
| ATCOPIA3 | Chr1:9476030-9480581     | Chr1-9478025  | CIS                 | 1.18E-59 | 4.27E-23  | 4.48E-41 | 0.479 |                   |
| ATCOPIA3 | Chr1:10065788-10144540   | Chr1-10114390 | TRANS               | 2.77E-10 | 1.00E-03  | 8.50E-08 | 0.244 | Centromere        |

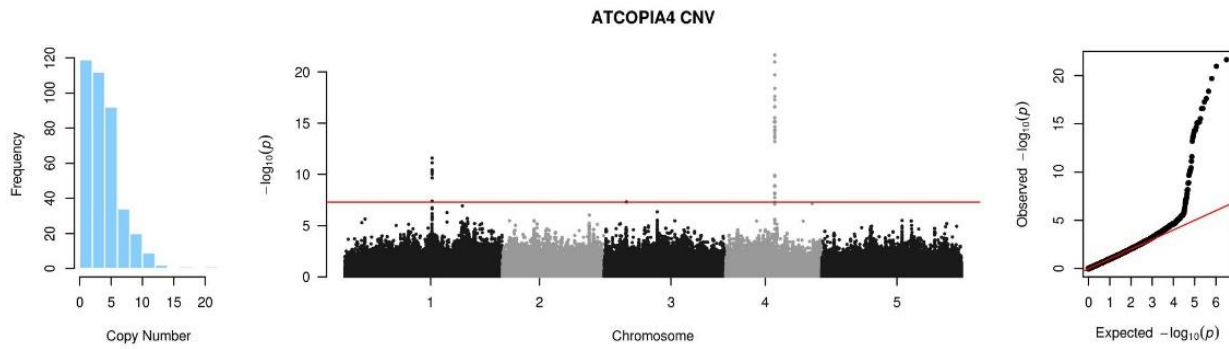

| TE       | GWAS associated interval | Leading SNP   | Type of association | P-value  |           |          | MAF   | Candidate gene(s) |
|----------|--------------------------|---------------|---------------------|----------|-----------|----------|-------|-------------------|
|          |                          |               |                     | Joined   | Worldwide | Sweden   |       |                   |
| ATCOPIA4 | Chr1:16853511-16857178   | Chr1-16853512 | CIS                 | 7.37E-12 | 1.82E-08  | 6.36E-05 | 0.456 |                   |
| ATCOPIA4 | Chr4:9483993-9488516     | Chr4-9485781  | CIS                 | 2.24E-22 | 8.60E-14  | 7.06E-11 | 0.477 |                   |

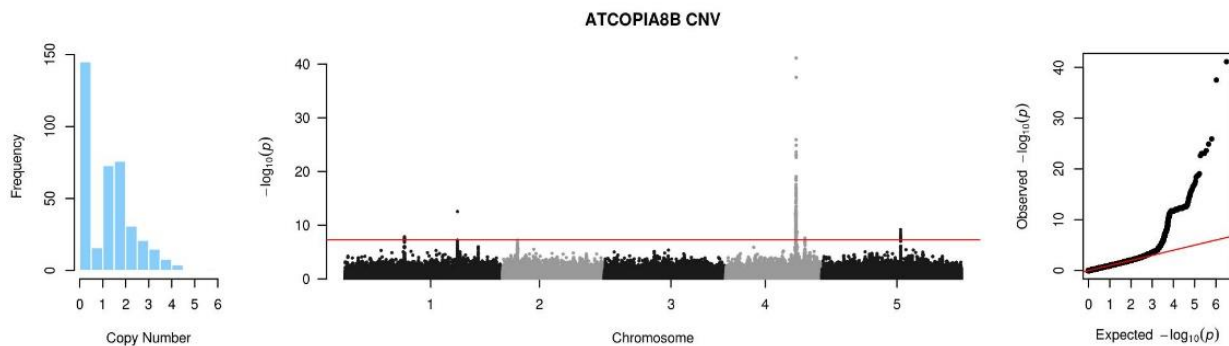

| TE        | GWAS associated interval | Leading SNP   | Type of association | P-value  |           |          | MAF   | Candidate gene(s)                          |
|-----------|--------------------------|---------------|---------------------|----------|-----------|----------|-------|--------------------------------------------|
|           |                          |               |                     | Joined   | Worldwide | Sweden   |       |                                            |
| ATCOPIA8B | Chr1:11505352-11506731   | Chr1-11505353 | TRANS               | 1.44E-08 | 1.09E-04  | 1.65E-05 | 0.300 | AT1G32000, AT1G32010, AT1G32020, AT1G32030 |
| ATCOPIA8B | Chr1:21752025-21752027   | Chr1-21752026 | CIS                 | 2.90E-13 | 2.17E-05  | 1.42E-10 | 0.238 |                                            |
| ATCOPIA8B | Chr4:13531245-13816484   | Chr4-13627337 | CIS                 | 7.46E-42 | 5.10E-28  | 8.82E-17 | 0.454 |                                            |
| ATCOPIA8B | Chr4:15327376-15327920   | Chr4-15327377 | CIS                 | 2.63E-08 | NA        | 1.10E-07 | 0.131 |                                            |
| ATCOPIA8B | Chr5:15241272-15244051   | Chr5-15241273 | TRANS               | 6.73E-10 | 2.96E-04  | 1.28E-07 | 0.413 | AT5G38195                                  |

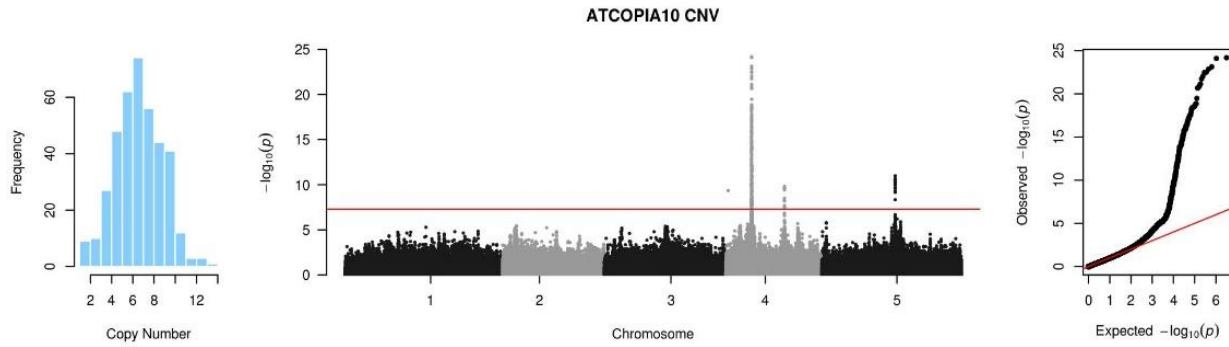

| TE        | GWAS associated interval | Leading SNP   | Type of association | P-value  |           |          | MAF   | Candidate gene(s)                                                                      |
|-----------|--------------------------|---------------|---------------------|----------|-----------|----------|-------|----------------------------------------------------------------------------------------|
|           |                          |               |                     | Joined   | Worldwide | Sweden   |       |                                                                                        |
| ATCOPIA10 | Chr4:500303-500305       | Chr4-500304   | TRANS               | 4.49E-10 | 1.34E-05  | 6.75E-06 | 0.269 | AT4G01140, AT4G01150, AT4G01160, AT4G01170, AT4G01180, AT4G01190, AT4G01200, AT4G01210 |
| ATCOPIA10 | Chr4:4907701-5122395     | Chr4-5034442  | CIS                 | 7.99E-25 | 9.13E-16  | 2.21E-10 | 0.297 |                                                                                        |
| ATCOPIA10 | Chr4:11364113-11380407   | Chr4-11376940 | CIS                 | 1.54E-10 | 2.75E-07  | 7.48E-08 | 0.179 |                                                                                        |
| ATCOPIA10 | Chr5:14196459-14209447   | Chr5-14196547 | CIS                 | 1.04E-11 | 4.65E-07  | 6.95E-07 | 0.362 |                                                                                        |

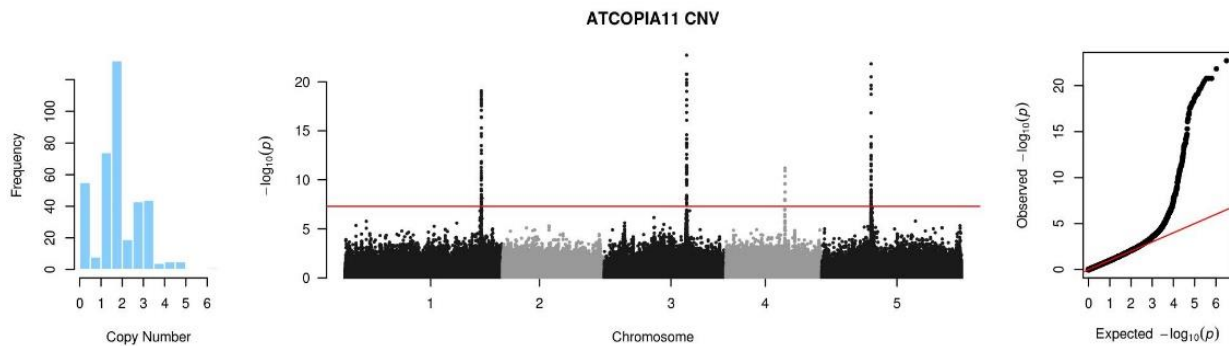

| TE        | GWAS associated interval | Leading SNP   | Type of association | P-value  |           |          | MAF   | Candidate gene(s)                                                                                                                  |
|-----------|--------------------------|---------------|---------------------|----------|-----------|----------|-------|------------------------------------------------------------------------------------------------------------------------------------|
|           |                          |               |                     | Joined   | Worldwide | Sweden   |       |                                                                                                                                    |
| ATCOPIA11 | Chr1:26341260-26465474   | Chr1-26370884 | CIS                 | 8.42E-20 | 1.06E-08  | 2.03E-13 | 0.300 |                                                                                                                                    |
| ATCOPIA11 | Chr3:15867269-15931805   | Chr3-15917909 | CIS                 | 1.95E-23 | 5.97E-16  | 1.08E-08 | 0.164 |                                                                                                                                    |
| ATCOPIA11 | Chr4:11441725-11484545   | Chr4-11460817 | TRANS               | 1.16E-08 | NA        | 5.65E-06 | 0.078 | AT4G21500, AT4G21510, AT4G21520, AT4G21530, AT4G21534, AT4G21540, AT4G21550, AT4G21560, AT4G21570, AT4G21580, AT4G21585, AT4G21590 |
| ATCOPIA11 | Chr5:9529127-9560997     | Chr5-9540237  | CIS                 | 1.48E-22 | 3.20E-13  | 1.04E-10 | 0.249 |                                                                                                                                    |

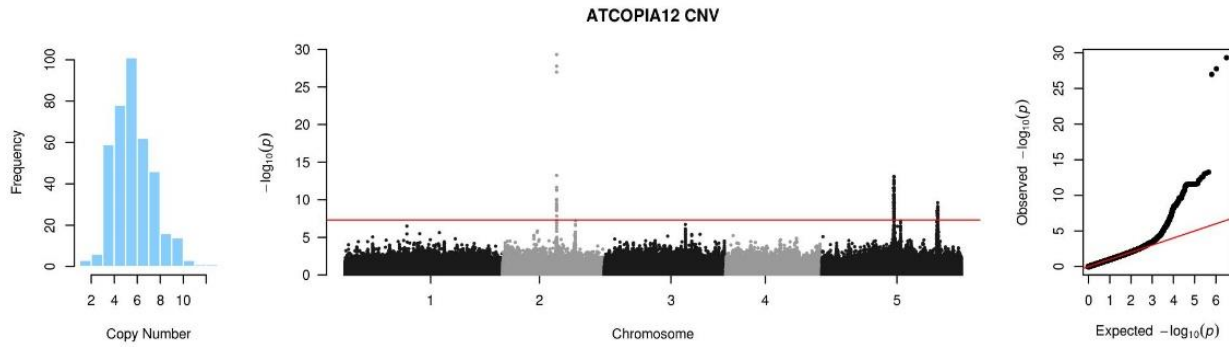

| TE        | GWAS associated interval | Leading SNP   | Type of association | P-value  |           |          | MAF   | Candidate gene(s) |
|-----------|--------------------------|---------------|---------------------|----------|-----------|----------|-------|-------------------|
|           |                          |               |                     | Joined   | Worldwide | Sweden   |       |                   |
| ATCOPIA12 | Chr2:10485359-10493333   | Chr2-10490467 | C/S                 | 4.84E-30 | 1.14E-12  | 3.35E-19 | 0.415 |                   |
| ATCOPIA12 | Chr5:13941203-13960559   | Chr5-13948475 | C/S                 | 9.90E-14 | 1.37E-08  | 1.06E-06 | 0.303 |                   |
| ATCOPIA12 | Chr5:22334744-22450916   | Chr5-22388168 | C/S                 | 2.53E-10 | 7.56E-05  | 8.42E-08 | 0.079 |                   |

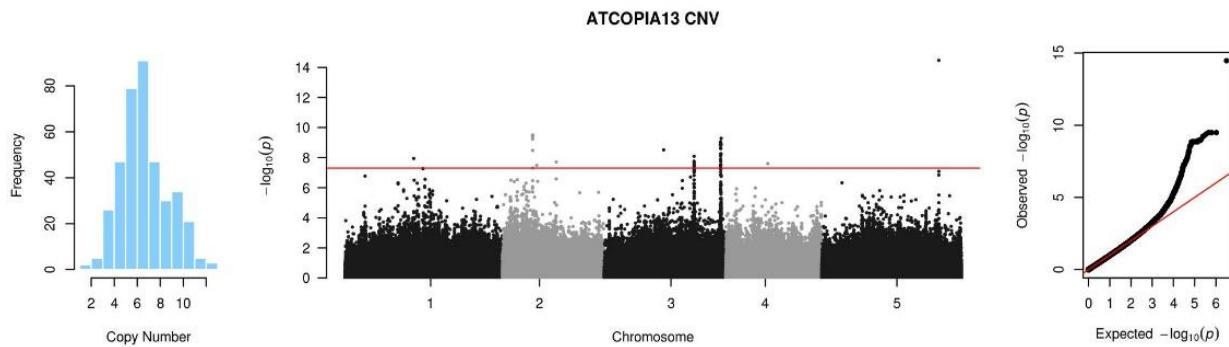

| TE        | GWAS associated interval | Leading SNP   | Type of association | P-value  |           |          | MAF   | Candidate gene(s)                                                                                                                                                                                                                                           |
|-----------|--------------------------|---------------|---------------------|----------|-----------|----------|-------|-------------------------------------------------------------------------------------------------------------------------------------------------------------------------------------------------------------------------------------------------------------|
|           |                          |               |                     | Joined   | Worldwide | Sweden   |       |                                                                                                                                                                                                                                                             |
| ATCOPIA13 | Chr2:10431596-10431598   | Chr2-10431597 | TRANS               | 1.97E-08 | 1.41E-05  | 4.39E-03 | 0.423 | AT2G24570                                                                                                                                                                                                                                                   |
| ATCOPIA13 | Chr2:5853595-5856494     | Chr2-5853596  | C/S                 | 4.00E-10 | 8.09E-08  | 5.63E-04 | 0.138 |                                                                                                                                                                                                                                                             |
| ATCOPIA13 | Chr3:11495299-11495301   | Chr3-11495300 | TRANS               | 3.02E-09 | 4.13E-09  | NA       | 0.228 | AT3G29644                                                                                                                                                                                                                                                   |
| ATCOPIA13 | Chr3:17353731-17359266   | Chr3-17356687 | TRANS               | 8.16E-09 | 1.60E-04  | 6.65E-06 | 0.221 | AT3G47090, AT3G47100, AT3G47110, AT3G47120, AT3G47130, AT3G47140, AT3G47150, AT3G47160, AT3G47170                                                                                                                                                           |
| ATCOPIA13 | Chr3:22502613-22593700   | Chr3-22593699 | TRANS               | 5.18E-10 | 3.94E-04  | 8.16E-08 | 0.274 | AT3G60870, AT3G60880, AT3G60890, AT3G60897, AT3G60900, AT3G60910, AT3G60920, AT3G60940, AT3G60950, AT3G60960, AT3G60961, AT3G60966, AT3G60970, AT3G60972, AT3G60980, AT3G60990, AT3G61010, AT3G61028, AT3G61030, AT3G61035, AT3G61040, AT3G61050, AT3G61060 |
| ATCOPIA13 | Chr4:8148311-8148313     | Chr4-8148312  | TRANS               | 2.52E-08 | 2.38E-07  | NA       | 0.226 | AT4G14140 (MET2a)                                                                                                                                                                                                                                           |
| ATCOPIA13 | Chr5:22617655-22617657   | Chr5-22617656 | C/S                 | 3.38E-15 | 4.29E-08  | 6.58E-09 | 0.151 |                                                                                                                                                                                                                                                             |

### ATCOPIA15 CNV

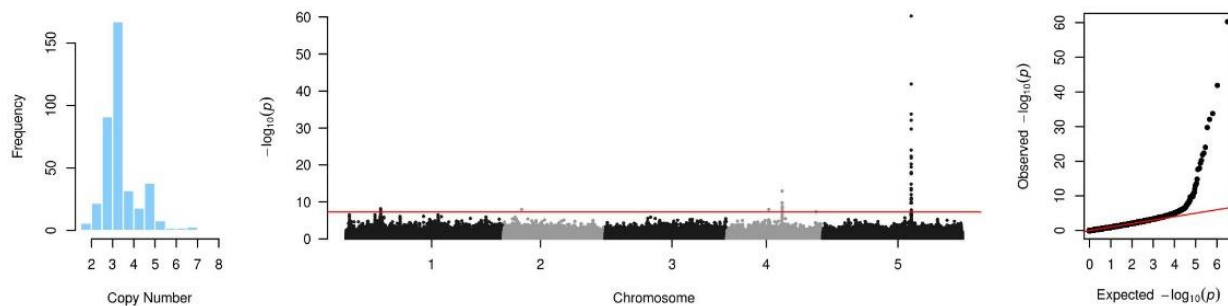

| TE        | GWAS associated interval | Leading SNP   | Type of association | P-value  |           |          | MAF   | Candidate gene(s)        |
|-----------|--------------------------|---------------|---------------------|----------|-----------|----------|-------|--------------------------|
|           |                          |               |                     | Joined   | Worldwide | Sweden   |       |                          |
| ATCOPIA15 | Chr1:6691019-6693438     | Chr1-6691020  | TRANS               | 6.95E-09 | 1.07E-04  | 3.94E-07 | 0.264 | AT1G19340                |
| ATCOPIA15 | Chr2:3543097-3543099     | Chr2-3543098  | TRANS               | 1.01E-08 | 2.68E-07  | NA       | 0.056 | .                        |
| ATCOPIA15 | Chr4:8140855-8140857     | Chr4-8140856  | TRANS               | 1.01E-08 | 1.12E-06  | NA       | 0.154 | <b>AT4G14140 (MET2a)</b> |
| ATCOPIA15 | Chr5:17086844-17108149   | Chr5-17095071 | CIS                 | 5.36E-61 | 1.59E-29  | 3.92E-43 | 0.200 |                          |

### ATCOPIA21 CNV

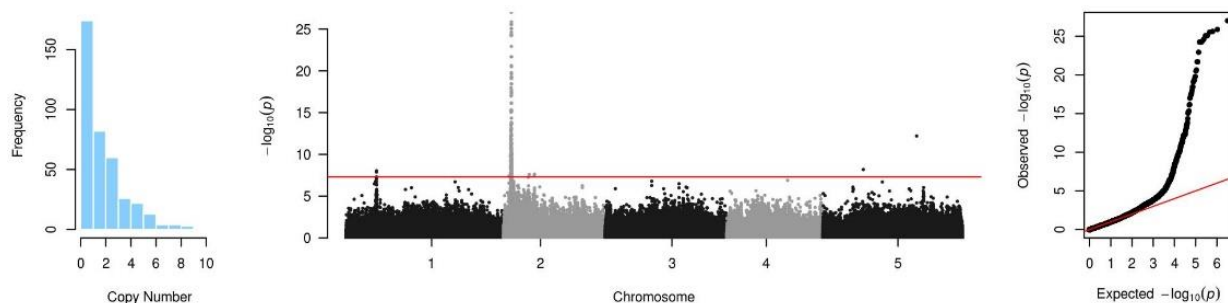

| TE        | GWAS associated interval | Leading SNP   | Type of association | P-value  |           |          | MAF   | Candidate gene(s)                                                                                                                                        |
|-----------|--------------------------|---------------|---------------------|----------|-----------|----------|-------|----------------------------------------------------------------------------------------------------------------------------------------------------------|
|           |                          |               |                     | Joined   | Worldwide | Sweden   |       |                                                                                                                                                          |
| ATCOPIA21 | Chr1:5907163-5932529     | Chr1-5932528  | TRANS               | 9.27E-09 | 1.07E-02  | 3.30E-07 | 0.097 | AT1G17240, AT1G17250, AT1G17255, AT1G17260, AT1G17270, AT1G17280, AT1G17285, AT1G17290, AT1G17300, AT1G17310, AT1G17330, AT1G17340, AT1G17345, AT1G17350 |
| ATCOPIA21 | Chr2:1361817-1569513     | Chr2-1545294  | TRANS               | 1.00E-27 | 2.63E-11  | 2.25E-17 | 0.162 | Centromere                                                                                                                                               |
| ATCOPIA21 | Chr2:5003212-5003214     | Chr2-5003213  | TRANS               | 2.53E-08 | NA        | 4.52E-05 | 0.062 | AT2G12400, AT2G12405                                                                                                                                     |
| ATCOPIA21 | Chr2:6027055-6027057     | Chr2-6027056  | TRANS               | 2.33E-08 | NA        | 3.70E-06 | 0.079 | AT2G14210, AT2G14247, AT2G14255                                                                                                                          |
| ATCOPIA21 | Chr5:7834869-7834871     | Chr5-7834870  | TRANS               | 6.44E-09 | 2.00E-05  | 9.53E-05 | 0.156 | AT5G23230, AT5G23240, AT5G23250, AT5G23260, AT5G23270, AT5G23280                                                                                         |
| ATCOPIA21 | Chr5:18146702-18146704   | Chr5-18146703 | CIS                 | 6.37E-13 | 3.74E-05  | 2.26E-10 | 0.341 |                                                                                                                                                          |

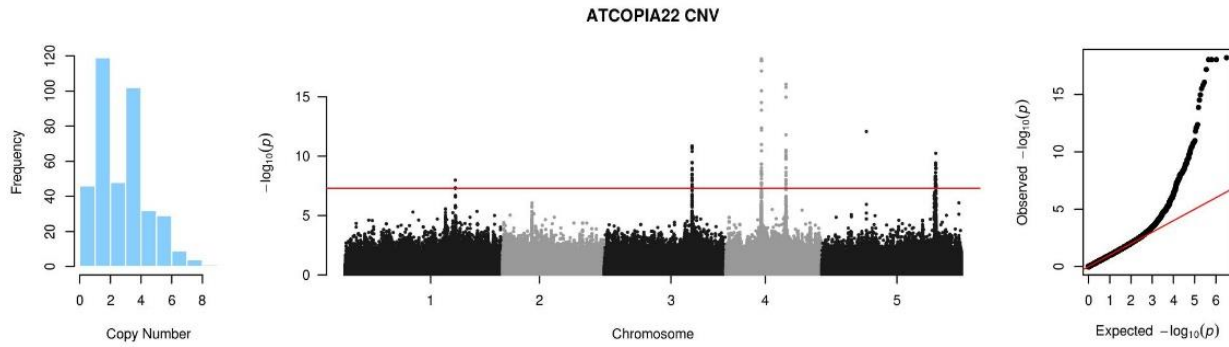

| TE        | GWAS associated interval | Leading SNP   | Type of association | P-value  |           |          | MAF   | Candidate gene(s)                                                |
|-----------|--------------------------|---------------|---------------------|----------|-----------|----------|-------|------------------------------------------------------------------|
|           |                          |               |                     | Joined   | Worldwide | Sweden   |       |                                                                  |
| ATCOPIA22 | Chr1:21331281-21331283   | Chr1-21331282 | TRANS               | 1.03E-08 | 2.11E-05  | 5.79E-05 | 0.131 | AT1G57570, AT1G57580, AT1G57590, AT1G57600, AT1G57610, AT1G57613 |
| ATCOPIA22 | Chr3:16986926-16997760   | Chr3-16990821 | C/S                 | 1.56E-11 | 8.86E-10  | 3.02E-04 | 0.233 |                                                                  |
| ATCOPIA22 | Chr4:6889588-6925403     | Chr4-6914365  | C/S                 | 6.20E-19 | 7.33E-10  | 3.78E-11 | 0.415 |                                                                  |
| ATCOPIA22 | Chr4:11674680-11689673   | Chr4-11683009 | C/S                 | 8.60E-17 | 3.88E-10  | 5.46E-08 | 0.413 |                                                                  |
| ATCOPIA22 | Chr5:8626824-8626826     | Chr5-8626825  | C/S                 | 8.35E-13 | 6.06E-06  | 7.19E-09 | 0.321 |                                                                  |
| ATCOPIA22 | Chr5:21983780-22083456   | Chr5-22008321 | C/S                 | 3.64E-10 | 7.01E-04  | 3.74E-08 | 0.397 |                                                                  |

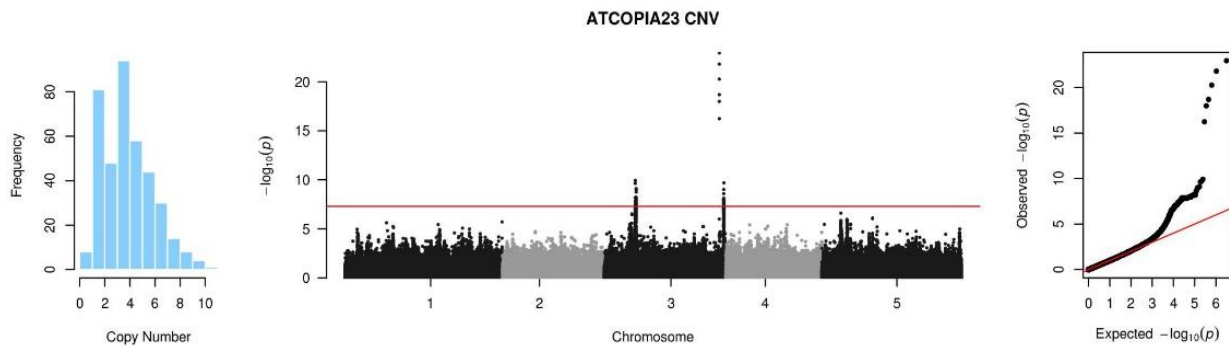

| TE        | GWAS associated interval | Leading SNP   | Type of association | P-value  |           |          | MAF   | Candidate gene(s) |
|-----------|--------------------------|---------------|---------------------|----------|-----------|----------|-------|-------------------|
|           |                          |               |                     | Joined   | Worldwide | Sweden   |       |                   |
| ATCOPIA23 | Chr3:6003034-6152323     | Chr3-6009730  | C/S                 | 1.18E-10 | NA        | 3.66E-10 | 0.428 |                   |
| ATCOPIA23 | Chr3:22233653-22236246   | Chr3-22234997 | C/S                 | 1.13E-23 | 4.31E-13  | 5.84E-13 | 0.303 |                   |
| ATCOPIA23 | Chr3:23091858-23119620   | Chr3-23095275 | C/S                 | 9.59E-10 | 2.32E-10  | NA       | 0.387 |                   |

# ATCOPIA25 CNV

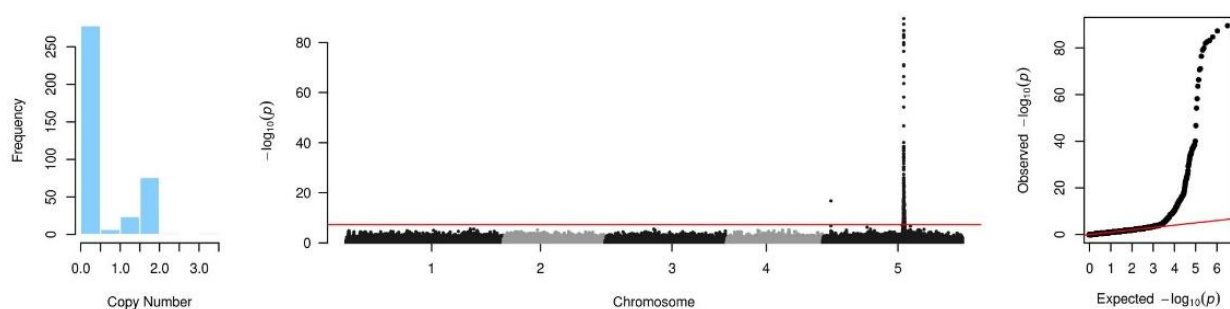

| TE        | GWAS associated interval | Leading SNP   | Type of association | P-value  |           |          | MAF   | Candidate gene(s)                                                                                            |
|-----------|--------------------------|---------------|---------------------|----------|-----------|----------|-------|--------------------------------------------------------------------------------------------------------------|
|           |                          |               |                     | Joined   | Worldwide | Sweden   |       |                                                                                                              |
| ATCOPIA25 | Chr5:15631732-15722788   | Chr5-1565233  | TRANS               | 1.71E-17 | 2.75E-08  | 3.32E-11 | 0.387 | AT5G05240, AT5G05250, AT5G05260, AT5G05270, AT5G05280, AT5G05282, AT5G05290, AT5G05300, AT5G05310, AT5G05320 |
| ATCOPIA25 | Chr5:1565232-1565234     | Chr5-15536214 | TRANS               | 4.87E-09 | 1.07E-08  | 1.13E-01 | 0.338 | AT5G38760, AT5G38770, AT5G38780, AT5G38790, AT5G38800, AT5G38810, AT5G38820, AT5G38830                       |
| ATCOPIA25 | Chr5:15534667-15536215   | Chr5-15646847 | CIS                 | 2.96E-90 | 4.49E-49  | 2.52E-43 | 0.244 |                                                                                                              |

# ATCOPIA27 CNV

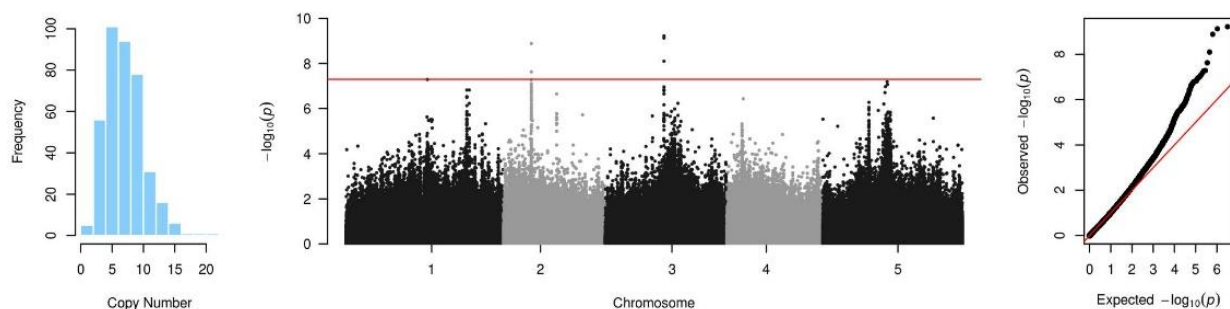

| TE        | GWAS associated interval | Leading SNP   | Type of association | P-value  |           |          | MAF   | Candidate gene(s) |
|-----------|--------------------------|---------------|---------------------|----------|-----------|----------|-------|-------------------|
|           |                          |               |                     | Joined   | Worldwide | Sweden   |       |                   |
| ATCOPIA27 | Chr2:5395709-5399290     | Chr2-5399289  | CIS                 | 1.30E-09 | 3.06E-04  | 3.54E-07 | 0.426 |                   |
| ATCOPIA27 | Chr3:11336905-11341663   | Chr3-11341654 | CIS                 | 6.02E-10 | NA        | 3.69E-08 | 0.364 |                   |

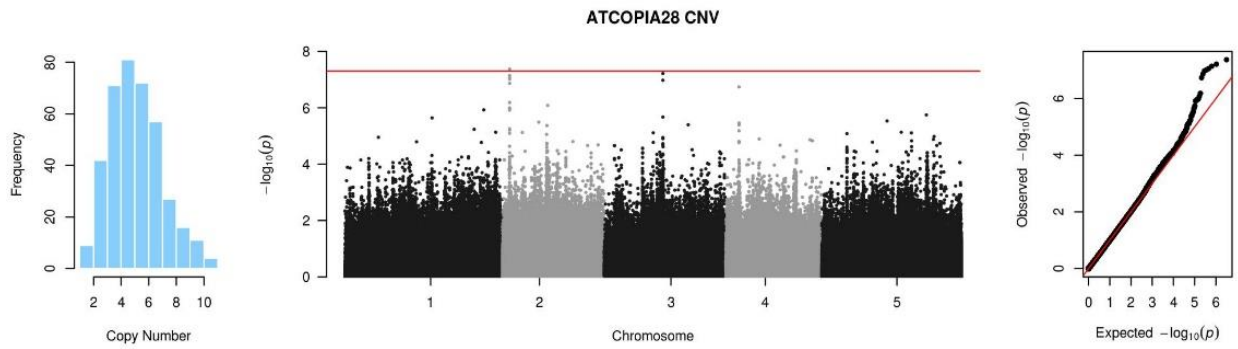

| TE | GWAS associated interval | Leading SNP | Type of association | P-value |           |        | MAF | Candidate gene(s) |
|----|--------------------------|-------------|---------------------|---------|-----------|--------|-----|-------------------|
|    |                          |             |                     | Joined  | Worldwide | Sweden |     |                   |
|    |                          |             |                     |         |           |        |     |                   |

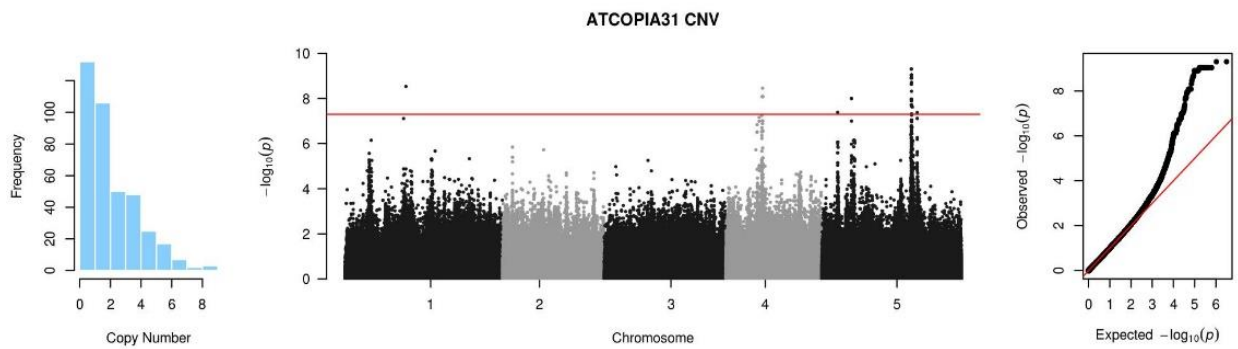

| TE        | GWAS associated interval | Leading SNP   | Type of association | P-value  |           |          | MAF   | Candidate gene(s)                                                                                                                                        |
|-----------|--------------------------|---------------|---------------------|----------|-----------|----------|-------|----------------------------------------------------------------------------------------------------------------------------------------------------------|
|           |                          |               |                     | Joined   | Worldwide | Sweden   |       |                                                                                                                                                          |
| ATCOPIA31 | Chr1:11792244-11792246   | Chr1-11792245 | CIS                 | 2.93E-09 | 2.70E-04  | 1.90E-06 | 0.233 |                                                                                                                                                          |
| ATCOPIA31 | Chr4:7115170-7148336     | Chr4-7115171  | TRANS               | 8.21E-09 | 8.98E-04  | NA       | 0.056 | AT4G11810, AT4G11820, AT4G11830, AT4G11840, AT4G11845, AT4G11850, AT4G11860, AT4G11870, AT4G11876, AT4G11880, AT4G11890, AT4G11900, AT4G11910, AT4G11911 |
| ATCOPIA31 | Chr5:17518855-17518857   | Chr5-5749637  | CIS                 | 1.00E-08 | 1.04E-04  | 8.20E-05 | 0.121 |                                                                                                                                                          |
| ATCOPIA31 | Chr5:5749636-5753383     | Chr5-17518856 | TRANS               | 2.39E-08 | 9.60E-05  | 9.55E-06 | 0.179 | AT5G43620/AT5G43630                                                                                                                                      |

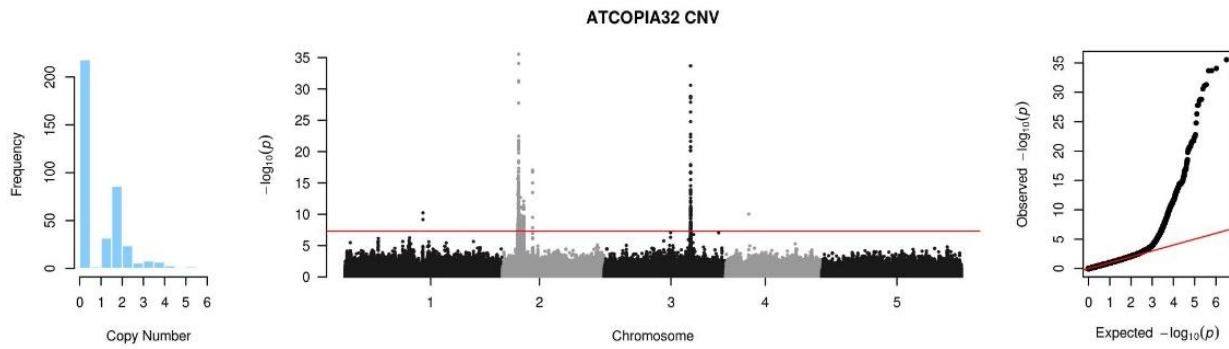

| TE        | GWAS associated interval | Leading SNP   | Type of association | P-value  |           |          | MAF   | Candidate gene(s)                                                                                                                                      |
|-----------|--------------------------|---------------|---------------------|----------|-----------|----------|-------|--------------------------------------------------------------------------------------------------------------------------------------------------------|
|           |                          |               |                     | Joined   | Worldwide | Sweden   |       |                                                                                                                                                        |
| ATCOPIA32 | Chr1:15081095-15081108   | Chr1-15081107 | TRANS               | 5.86E-11 | 5.25E-07  | 4.82E-06 | 0.262 | AT1G40104                                                                                                                                              |
| ATCOPIA32 | Chr2:2988052-3233924     | Chr2-3165157  | CIS                 | 2.85E-36 | 4.63E-20  | 1.27E-19 | 0.213 |                                                                                                                                                        |
| ATCOPIA32 | Chr2:3912394-4142561     | Chr2-4116428  | TRANS               | 7.79E-13 | 6.01E-07  | 4.03E-10 | 0.149 | AT2G10260, AT2G10340, AT2G10440, AT2G10450, AT2G10535, AT2G10537, AT2G10550, AT2G10557, AT2G10560, AT2G10602, <b>AT2G10606 (AtMIR396a)</b> , AT2G10608 |
| ATCOPIA32 | Chr2:5842521-5844665     | Chr2-5844284  | CIS                 | 9.22E-18 | 3.28E-13  | 4.77E-05 | 0.141 |                                                                                                                                                        |
| ATCOPIA32 | Chr3:16653606-16706917   | Chr3-16692698 | CIS                 | 2.05E-34 | 1.54E-15  | 1.28E-19 | 0.228 |                                                                                                                                                        |
| ATCOPIA32 | Chr4:4490149-4490151     | Chr4-4490150  | TRANS               | 9.43E-11 | 5.10E-06  | 1.29E-06 | 0.136 |                                                                                                                                                        |

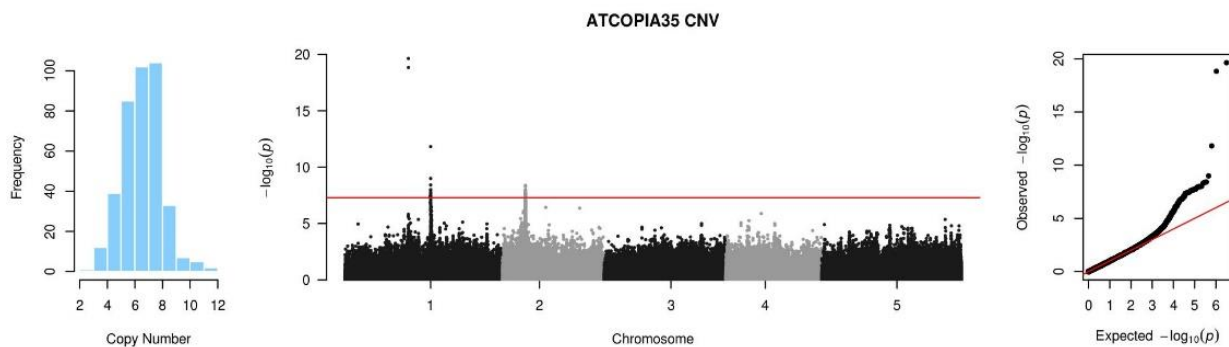

| TE        | GWAS associated interval | Leading SNP   | Type of association | P-value  |           |          | MAF   | Candidate gene(s) |
|-----------|--------------------------|---------------|---------------------|----------|-----------|----------|-------|-------------------|
|           |                          |               |                     | Joined   | Worldwide | Sweden   |       |                   |
| ATCOPIA35 | Chr1:12275476-12276017   | Chr1-12275477 | CIS                 | 2.33E-20 | 4.01E-12  | 1.10E-08 | 0.238 |                   |
| ATCOPIA35 | Chr1:16569369-16574867   | Chr1-16569613 | CIS                 | 1.54E-12 | 8.37E-08  | 5.06E-06 | 0.492 |                   |
| ATCOPIA35 | Chr2:4433215-4466730     | Chr2-4460190  | CIS                 | 9.72E-09 | 3.94E-04  | 3.39E-07 | 0.267 |                   |

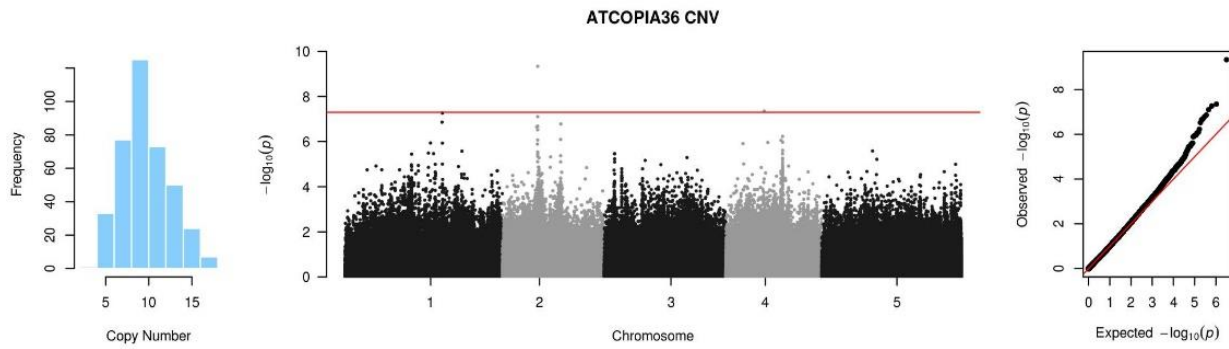

| TE        | GWAS associated interval | Leading SNP  | Type of association | P-value  |           |          | MAF   | Candidate gene(s) |
|-----------|--------------------------|--------------|---------------------|----------|-----------|----------|-------|-------------------|
|           |                          |              |                     | Joined   | Worldwide | Sweden   |       |                   |
| ATCOPIA36 | Chr2:6823369-6823371     | Chr2-6823370 | C/S                 | 4.60E-10 | 1.09E-08  | 5.98E-04 | 0.141 |                   |

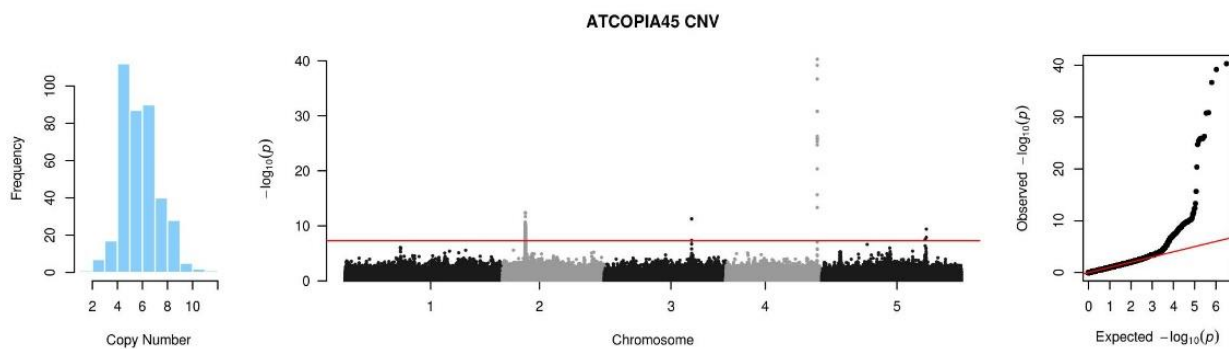

| TE        | GWAS associated interval | Leading SNP   | Type of association | P-value  |           |          | MAF   | Candidate gene(s) |
|-----------|--------------------------|---------------|---------------------|----------|-----------|----------|-------|-------------------|
|           |                          |               |                     | Joined   | Worldwide | Sweden   |       |                   |
| ATCOPIA45 | Chr2:4424480-4470623     | Chr2-4448145  | C/S                 | 3.80E-13 | 2.07E-06  | 5.36E-11 | 0.326 |                   |
| ATCOPIA45 | Chr3:16887713-16888130   | Chr3-16887714 | C/S                 | 5.06E-12 | 1.15E-07  | 1.03E-05 | 0.167 |                   |
| ATCOPIA45 | Chr4:17712213-17716723   | Chr4-17714966 | C/S                 | 4.92E-41 | 4.04E-20  | 4.54E-22 | 0.385 |                   |
| ATCOPIA45 | Chr5:19992222-20214930   | Chr5-20214929 | C/S                 | 3.72E-10 | 2.05E-06  | 3.82E-05 | 0.113 |                   |

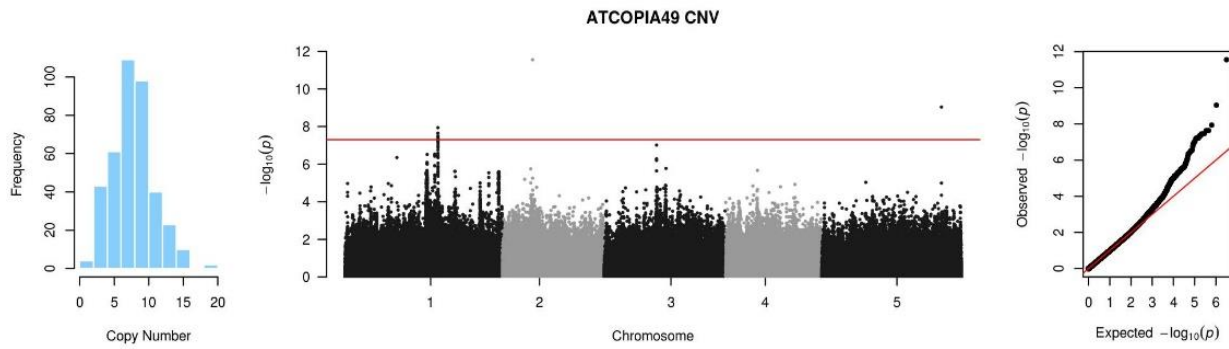

| TE        | GWAS associated interval | Leading SNP   | Type of association | P-value  |           |          | MAF   | Candidate gene(s)    |
|-----------|--------------------------|---------------|---------------------|----------|-----------|----------|-------|----------------------|
|           |                          |               |                     | Joined   | Worldwide | Sweden   |       |                      |
| ATCOPIA49 | Chr1:17971317-17972346   | Chr1-17971318 | TRANS               | 2.30E-08 | 1.89E-02  | 1.90E-07 | 0.062 | AT1G48610, AT1G48620 |
| ATCOPIA49 | Chr5:23137090-23137092   | Chr5-23137091 | C/S                 | 9.10E-10 | 1.05E-06  | 9.76E-04 | 0.300 |                      |

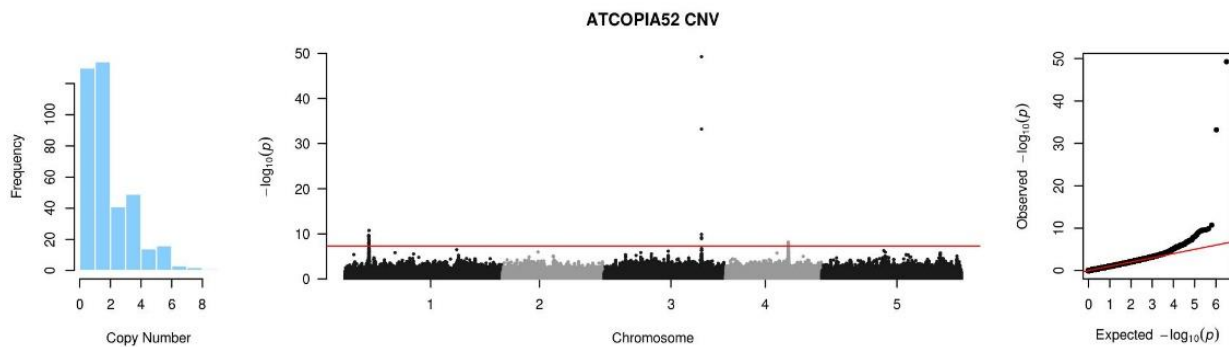

| TE        | GWAS associated interval | Leading SNP   | Type of association | P-value  |           |          | MAF   | Candidate gene(s) |
|-----------|--------------------------|---------------|---------------------|----------|-----------|----------|-------|-------------------|
|           |                          |               |                     | Joined   | Worldwide | Sweden   |       |                   |
| ATCOPIA52 | Chr1:4601427-4637435     | Chr1-4608098  | C/S                 | 2.46E-10 | NA        | 6.84E-10 | 0.223 |                   |
| ATCOPIA52 | Chr3:18791446-18794342   | Chr3-18794341 | C/S                 | 5.44E-50 | 9.81E-29  | 3.49E-23 | 0.341 |                   |
| ATCOPIA52 | Chr4:12087454-12124406   | Chr4-12087455 | C/S                 | 6.92E-09 | 8.35E-06  | 2.69E-05 | 0.169 |                   |

# ATCOPIA56 CNV

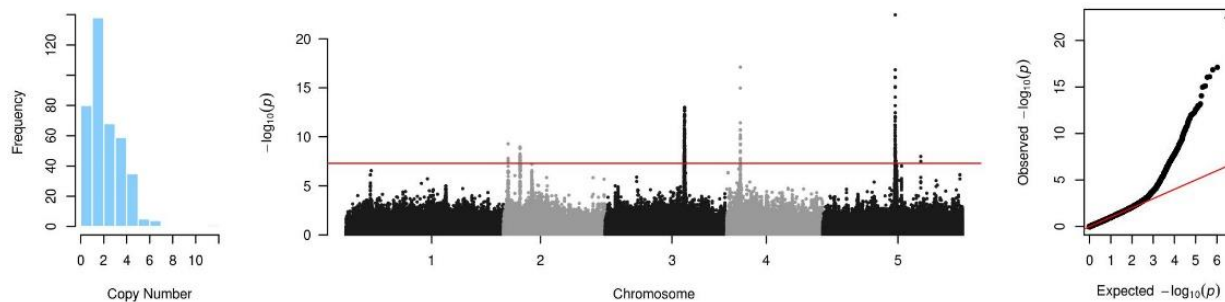

| TE        | GWAS associated interval | Leading SNP   | Type of association | P-value  |           |          | MAF   | Candidate gene(s)                                                |
|-----------|--------------------------|---------------|---------------------|----------|-----------|----------|-------|------------------------------------------------------------------|
|           |                          |               |                     | Joined   | Worldwide | Sweden   |       |                                                                  |
| ATCOPIA56 | Chr2:926086-928373       | Chr2-928372   | CIS                 | 1.59E-08 | NA        | 1.59E-08 | 0.120 |                                                                  |
| ATCOPIA56 | Chr2:3234681-3237292     | Chr2-3234682  | TRANS               | 1.08E-09 | 7.71E-07  | 6.15E-04 | 0.238 | AT2G07742, AT2G07749, AT2G07771, AT2G07773, AT2G07776            |
| ATCOPIA56 | Chr3:15250312-15250314   | Chr3-15250313 | TRANS               | 7.72E-09 | 8.45E-03  | 1.25E-07 | 0.126 | AT3G43300                                                        |
| ATCOPIA56 | Chr4:2638412-2651109     | Chr4-2644995  | CIS                 | 7.81E-18 | 6.95E-11  | 9.70E-10 | 0.436 |                                                                  |
| ATCOPIA56 | Chr5:13954062-14040109   | Chr5-13998970 | CIS                 | 3.65E-23 | 8.03E-15  | 2.19E-10 | 0.369 |                                                                  |
| ATCOPIA56 | Chr5:14126672-14136469   | Chr5-14126673 | TRANS               | 2.91E-08 | 7.05E-04  | 2.99E-06 | 0.238 | AT5G35970, AT5G35980, AT5G35995, AT5G36000, AT5G36001, AT5G36002 |
| ATCOPIA56 | Chr5:18934190-18934192   | Chr5-18934191 | TRANS               | 9.89E-09 | NA        | 5.27E-07 | 0.128 | AT5G46640, AT5G46650, AT5G46660, AT5G46670, AT5G46680            |

# ATCOPIA57 CNV

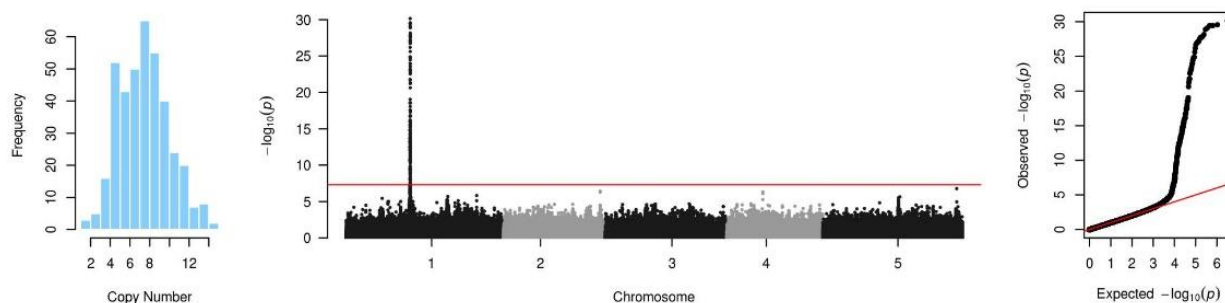

| TE        | GWAS associated interval | Leading SNP   | Type of association | P-value  |           |          | MAF   | Candidate gene(s) |
|-----------|--------------------------|---------------|---------------------|----------|-----------|----------|-------|-------------------|
|           |                          |               |                     | Joined   | Worldwide | Sweden   |       |                   |
| ATCOPIA57 | Chr1:12397425-12419360   | Chr1-12400225 | CIS                 | 7.06E-31 | 4.24E-20  | 6.40E-12 | 0.369 |                   |

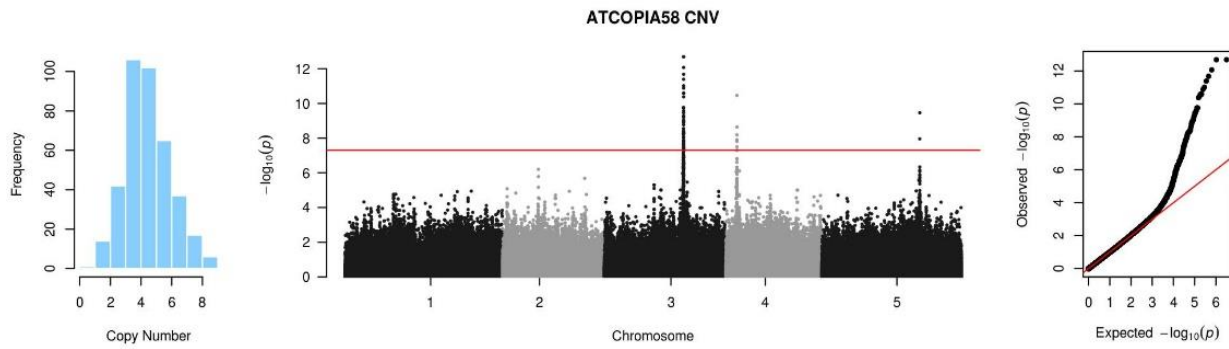

| TE        | GWAS associated interval | Leading SNP   | Type of association | P-value  |           |          | MAF   | Candidate gene(s) |
|-----------|--------------------------|---------------|---------------------|----------|-----------|----------|-------|-------------------|
|           |                          |               |                     | Joined   | Worldwide | Sweden   |       |                   |
| ATCOPIA58 | Chr3:15297177-15337326   | Chr3-15333805 | CIS                 | 1.73E-10 | 1.09E-05  | 9.17E-07 | 0.264 |                   |
| ATCOPIA58 | Chr4:2196868-2204565     | Chr4-2203315  | CIS                 | 2.29E-09 | 5.55E-03  | 1.06E-09 | 0.351 |                   |
| ATCOPIA58 | Chr5:18930571-18937598   | Chr5-18937597 | CIS                 | 3.45E-10 | NA        | 4.06E-11 | 0.295 |                   |

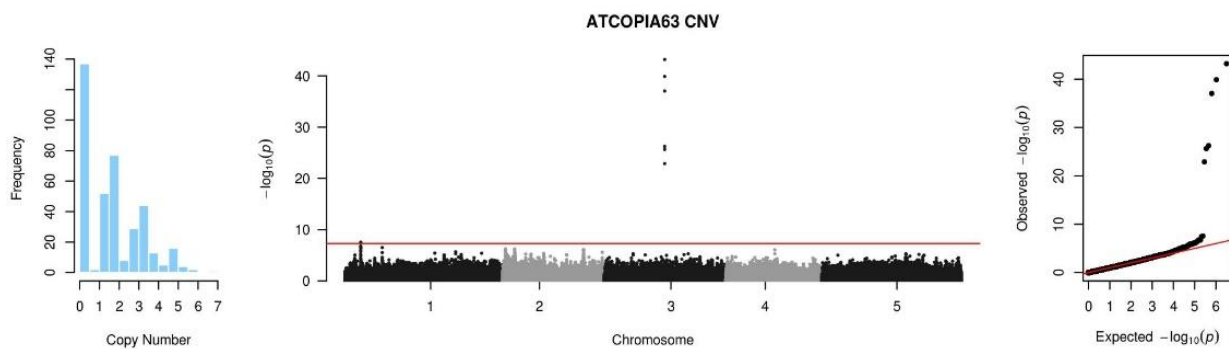

| TE        | GWAS associated interval | Leading SNP   | Type of association | P-value  |           |          | MAF   | Candidate gene(s)                                                           |
|-----------|--------------------------|---------------|---------------------|----------|-----------|----------|-------|-----------------------------------------------------------------------------|
|           |                          |               |                     | Joined   | Worldwide | Sweden   |       |                                                                             |
| ATCOPIA63 | Chr1:3070484-3070486     | Chr1-3070485  | TRANS               | 2.75E-08 | 7.88E-06  | NA       | 0.054 | AT1G09480, AT1G09483, AT1G09490, AT1G09500, AT1G09510, AT1G09520, AT1G09530 |
| ATCOPIA63 | Chr3:11665988-11669337   | Chr3-11668694 | CIS                 | 6.44E-44 | 3.05E-27  | 3.27E-22 | 0.367 |                                                                             |

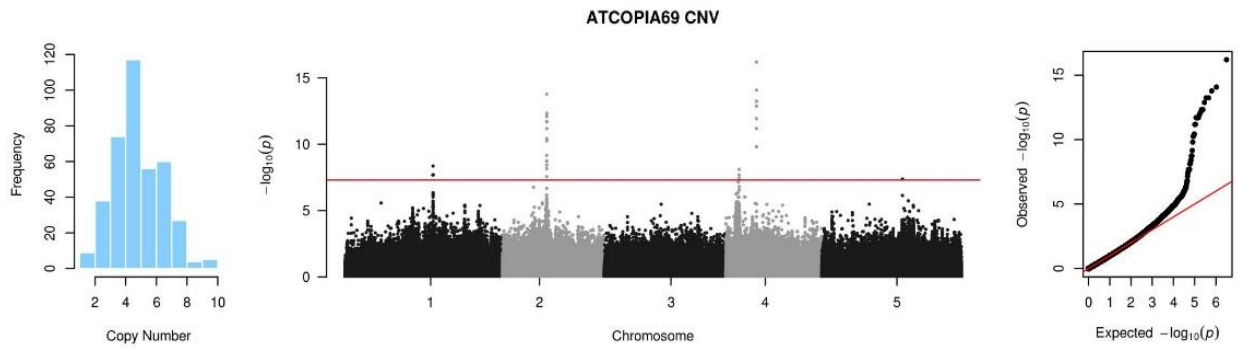

| TE        | GWAS associated interval | Leading SNP   | Type of association | P-value  |           |          | MAF   | Candidate gene(s)                          |
|-----------|--------------------------|---------------|---------------------|----------|-----------|----------|-------|--------------------------------------------|
|           |                          |               |                     | Joined   | Worldwide | Sweden   |       |                                            |
| ATCOPIA69 | Chr1:17021538-17021715   | Chr1-17021714 | TRANS               | 4.39E-09 | 6.77E-07  | NA       | 0.079 | AT1G45000, AT1G45010, AT1G45015, AT1G45050 |
| ATCOPIA69 | Chr2:8562490-8566582     | Chr2-8566517  | CIS                 | 1.68E-14 | 6.79E-09  | 1.92E-06 | 0.341 |                                            |
| ATCOPIA69 | Chr4:2603653-2604070     | Chr4-2604069  | CIS                 | 7.85E-09 | 5.67E-04  | 2.35E-07 | 0.185 |                                            |
| ATCOPIA69 | Chr4:5967301-5969646     | Chr4-5969528  | CIS                 | 6.40E-17 | 6.19E-12  | 4.63E-07 | 0.346 |                                            |

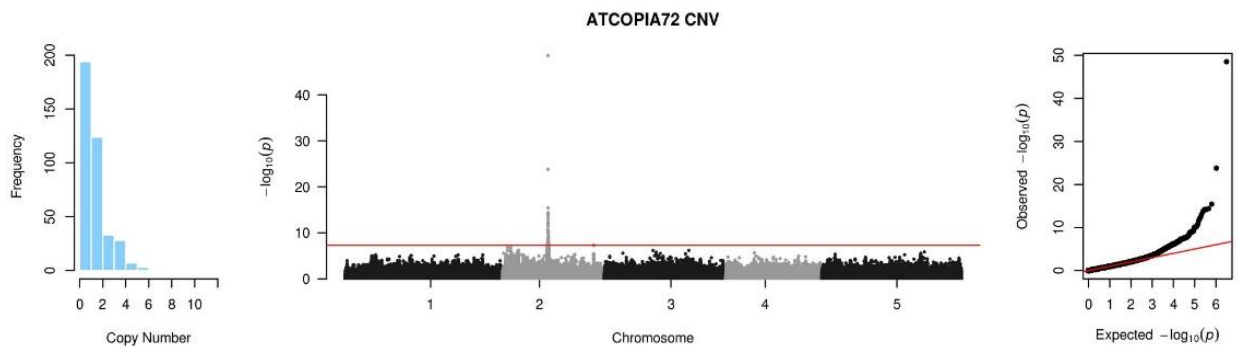

| TE        | GWAS associated interval | Leading SNP  | Type of association | P-value  |           |          | MAF   | Candidate gene(s) |
|-----------|--------------------------|--------------|---------------------|----------|-----------|----------|-------|-------------------|
|           |                          |              |                     | Joined   | Worldwide | Sweden   |       |                   |
| ATCOPIA72 | Chr2:8780704-8939446     | Chr2-8820365 | CIS                 | 3.03E-49 | 6.58E-25  | 3.06E-24 | 0.474 |                   |

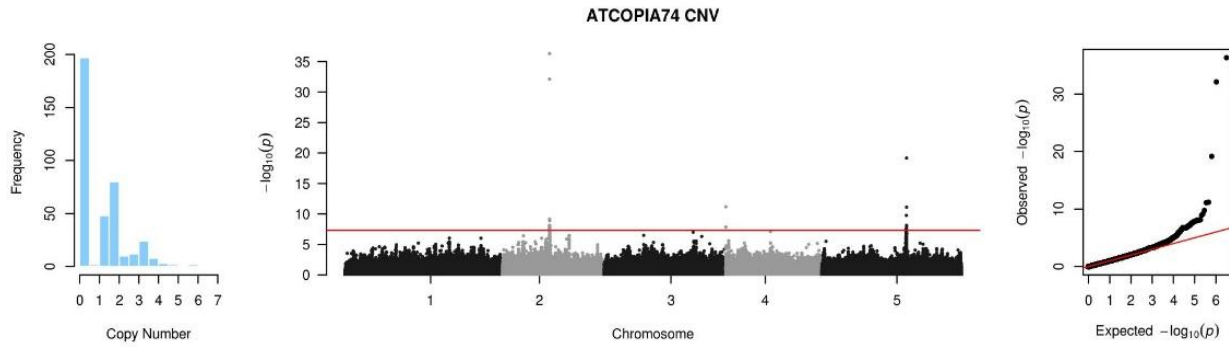

| TE        | GWAS associated interval | Leading SNP   | Type of association | P-value  |           |          | MAF   | Candidate gene(s)                                                                                                       |
|-----------|--------------------------|---------------|---------------------|----------|-----------|----------|-------|-------------------------------------------------------------------------------------------------------------------------|
|           |                          |               |                     | Joined   | Worldwide | Sweden   |       |                                                                                                                         |
| ATCOPIA74 | Chr2:9096957-9167689     | Chr2-9124731  | CIS                 | 4.93E-37 | 4.19E-20  | 6.36E-19 | 0.438 |                                                                                                                         |
| ATCOPIA74 | Chr4:30568-41778         | Chr4-41777    | TRANS               | 6.56E-12 | 2.39E-07  | 2.50E-05 | 0.262 | AT4G00060, AT4G00070, AT4G00080, AT4G00085, AT4G00090, AT4G00100, AT4G00110, AT4G00120, AT4G00124, AT4G00130, AT4G00140 |
| ATCOPIA74 | Chr5:16320093-16398302   | Chr5-16389345 | CIS                 | 6.89E-20 | 1.13E-15  | NA       | 0.090 |                                                                                                                         |

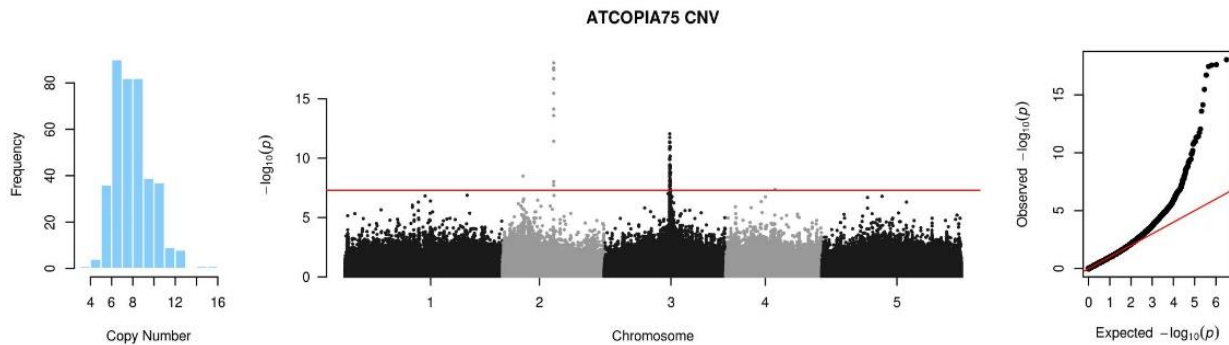

| TE        | GWAS associated interval | Leading SNP   | Type of association | P-value  |           |          | MAF   | Candidate gene(s) |
|-----------|--------------------------|---------------|---------------------|----------|-----------|----------|-------|-------------------|
|           |                          |               |                     | Joined   | Worldwide | Sweden   |       |                   |
| ATCOPIA75 | Chr2:3989860-3989862     | Chr2-3989861  | TRANS               | 3.13E-09 | 2.98E-09  | 8.57E-02 | 0.238 | AT2G10340         |
| ATCOPIA75 | Chr2:9928878-9932430     | Chr2-9930929  | CIS                 | 9.30E-19 | 1.17E-10  | 1.92E-10 | 0.477 |                   |
| ATCOPIA75 | Chr3:12834786-12834788   | Chr3-12834787 | TRANS               | 1.59E-09 | 9.04E-06  | 2.06E-06 | 0.338 |                   |

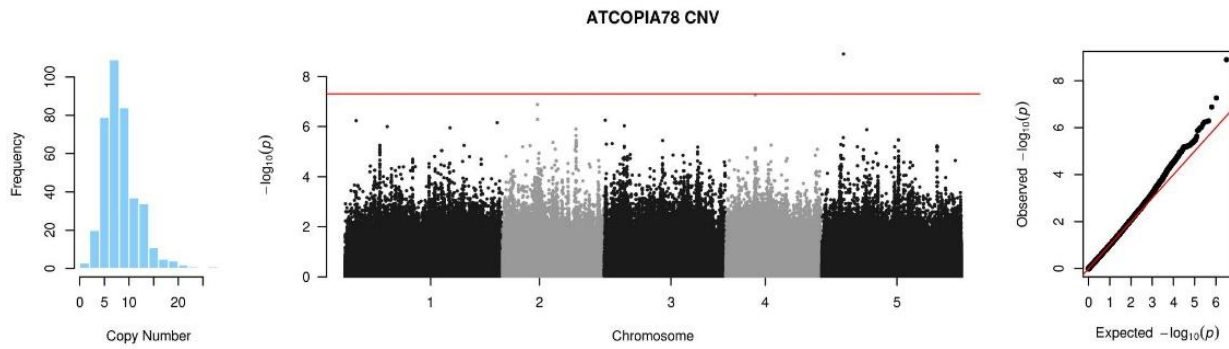

| TE        | GWAS associated interval | Leading SNP  | Type of association | P-value  |           |        | MAF   | Candidate gene(s)               |
|-----------|--------------------------|--------------|---------------------|----------|-----------|--------|-------|---------------------------------|
|           |                          |              |                     | Joined   | Worldwide | Sweden |       |                                 |
| ATCOPIA78 | Chr5:4188262-4188264     | Chr5-4188263 | TRANS               | 1.27E-09 | 3.94E-10  | NA     | 0.051 | AT5G13160, AT5G13170, AT5G13180 |

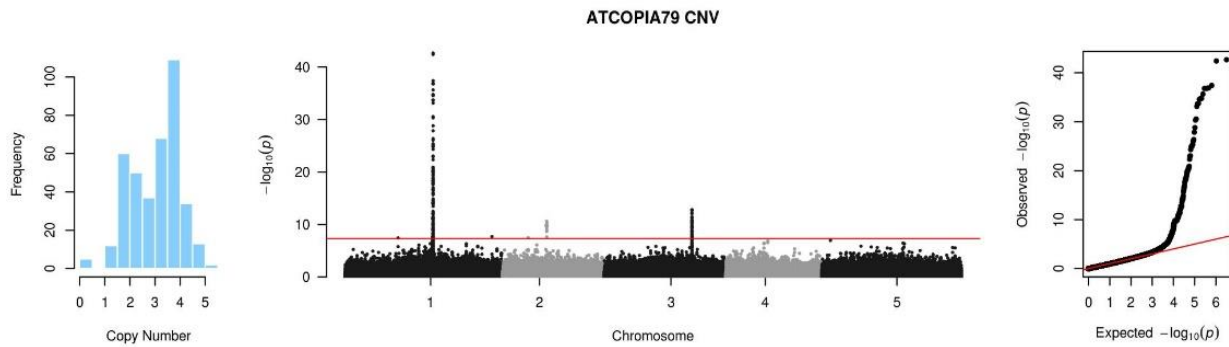

| TE        | GWAS associated interval | Leading SNP   | Type of association | P-value  |           |          | MAF   | Candidate gene(s)                                                           |
|-----------|--------------------------|---------------|---------------------|----------|-----------|----------|-------|-----------------------------------------------------------------------------|
|           |                          |               |                     | Joined   | Worldwide | Sweden   |       |                                                                             |
| ATCOPIA79 | Chr1:16980013-17031219   | Chr1-17025377 | C/S                 | 3.85E-43 | 1.93E-23  | 2.19E-23 | 0.292 |                                                                             |
| ATCOPIA79 | Chr1:28424371-28424373   | Chr1-28424372 | TRANS               | 2.10E-08 | 1.14E-07  | NA       | 0.118 | AT1G75660, AT1G75670, AT1G75680, AT1G75690, AT1G75700, AT1G75710, AT1G75717 |
| ATCOPIA79 | Chr2:8562348-8566414     | Chr2-8564058  | TRANS               | 2.97E-11 | 1.65E-06  | NA       | 0.056 | AT2G19820, AT2G19830, AT2G19850, AT2G19860, AT2G19870                       |
| ATCOPIA79 | Chr3:16954379-16964030   | Chr3-16960376 | C/S                 | 1.73E-10 | 1.90E-05  | 1.93E-07 | 0.259 |                                                                             |

### ATCOPIA85 CNV

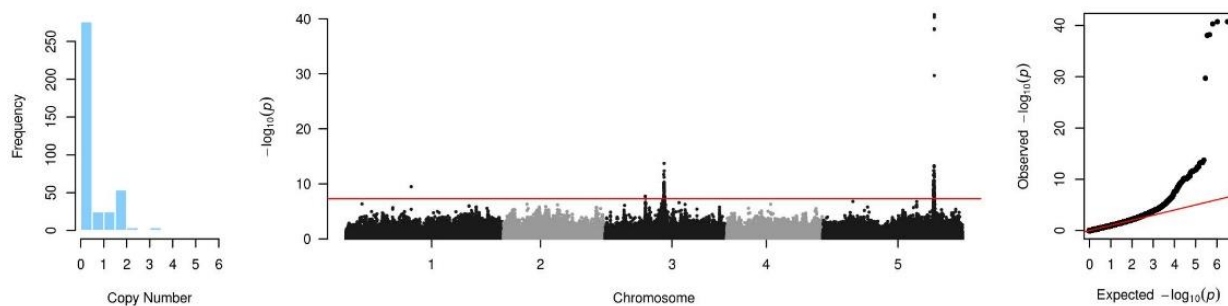

| TE        | GWAS associated interval | Leading SNP   | Type of association | P-value  |           |          | MAF   | Candidate gene(s)                                                                                                                                                                                    |
|-----------|--------------------------|---------------|---------------------|----------|-----------|----------|-------|------------------------------------------------------------------------------------------------------------------------------------------------------------------------------------------------------|
|           |                          |               |                     | Joined   | Worldwide | Sweden   |       |                                                                                                                                                                                                      |
| ATCOPIA85 | Chr1:12622354-12622356   | Chr1-12622355 | CIS                 | 3.18E-10 | NA        | 2.16E-08 | 0.121 |                                                                                                                                                                                                      |
| ATCOPIA85 | Chr3:7751220-7751222     | Chr3-7751221  | TRANS               | 1.63E-08 | 3.56E-08  | NA       | 0.077 | AT3G21970, AT3G21980, AT3G21990, AT3G22000, AT3G22010, AT3G22020, AT3G22022, AT3G22030                                                                                                               |
| ATCOPIA85 | Chr3:11289786-11522466   | Chr3-11350047 | TRANS               | 1.52E-10 | NA        | 6.32E-18 | 0.146 | AT3G29590, AT3G29636, AT3G29410, AT3G29644, AT3G29639, AT3G29638, AT3G29635, AT3G29633, AT3G29630, AT3G29390, AT3G29580, AT3G29575, AT3G29570, AT3G29560, AT3G29450, AT3G29431, AT3G29430, AT3G29400 |
| ATCOPIA85 | Chr5:21392325-21611278   | Chr5-21545142 | CIS                 | 1.88E-41 | 5.91E-12  | 5.81E-61 | 0.154 |                                                                                                                                                                                                      |

### ATCOPIA93 CNV

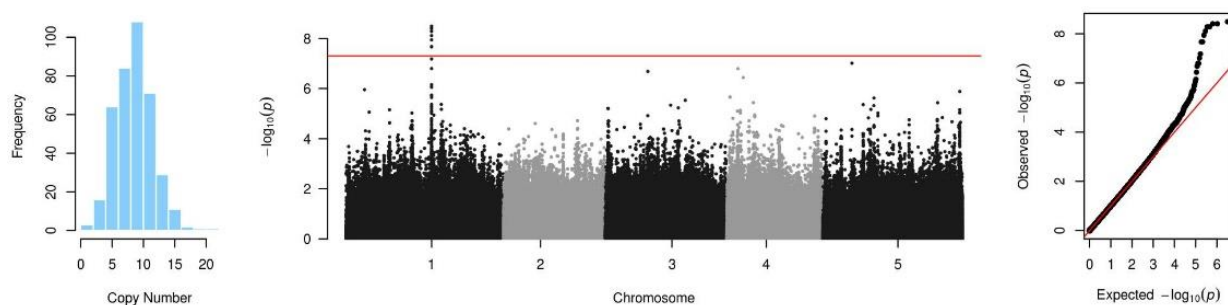

| TE        | GWAS associated interval | Leading SNP   | Type of association | P-value  |           |          | MAF   | Candidate gene(s) |
|-----------|--------------------------|---------------|---------------------|----------|-----------|----------|-------|-------------------|
|           |                          |               |                     | Joined   | Worldwide | Sweden   |       |                   |
| ATCOPIA93 | Chr1:16549768-16554098   | Chr1-16549829 | CIS                 | 5.20E-09 | 1.29E-05  | 6.58E-05 | 0.413 |                   |

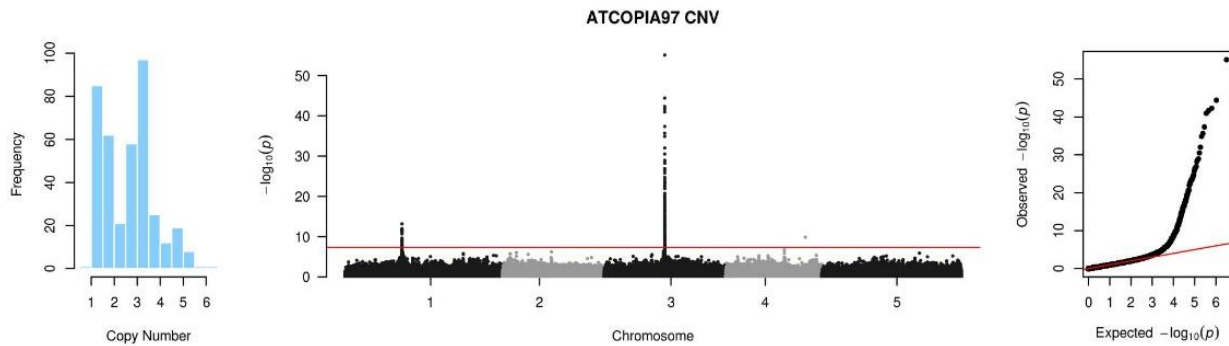

| TE        | GWAS associated interval | Leading SNP   | Type of association | P-value  |           |          | MAF   | Candidate gene(s) |
|-----------|--------------------------|---------------|---------------------|----------|-----------|----------|-------|-------------------|
|           |                          |               |                     | Joined   | Worldwide | Sweden   |       |                   |
| ATCOPIA97 | Chr1:11011579-11013340   | Chr1-11012665 | CIS                 | 2.28E-10 | 5.22E-05  | 4.04E-06 | 0.228 |                   |
| ATCOPIA97 | Chr3:11670224-11717607   | Chr3-11680834 | CIS                 | 7.99E-56 | 6.09E-26  | 4.23E-33 | 0.410 |                   |
| ATCOPIA97 | Chr4:15398043-15398045   | Chr4-15398044 | TRANS               | 1.31E-10 | 2.46E-04  | 4.79E-09 | 0.279 | AT4G31830         |

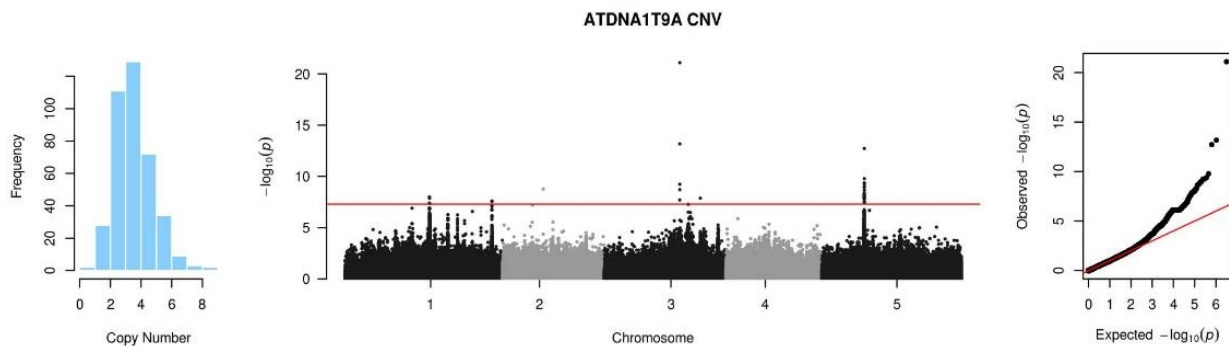

| TE        | GWAS associated interval | Leading SNP   | Type of association | P-value  |           |          | MAF   | Candidate gene(s)                                                |
|-----------|--------------------------|---------------|---------------------|----------|-----------|----------|-------|------------------------------------------------------------------|
|           |                          |               |                     | Joined   | Worldwide | Sweden   |       |                                                                  |
| ATDNA1T9A | Chr1:16343965-16361551   | Chr1-16343966 | CIS                 | 1.02E-08 | 2.57E-07  | 1.56E-03 | 0.169 | AT1G75660, AT1G75670, AT1G75680, AT1G75690, AT1G75700, AT1G75710 |
| ATDNA1T9A | Chr1:28419353-28419375   | Chr1-28419354 | TRANS               | 2.62E-08 | 7.92E-05  | 2.22E-05 | 0.238 |                                                                  |
| ATDNA1T9A | Chr2:7907427-7907429     | Chr2-7907428  | TRANS               | 1.70E-09 | NA        | 3.61E-07 | 0.172 | AT2TE32765 (VANDAL16)                                            |
| ATDNA1T9A | Chr3:14600022-14603445   | Chr3-14603444 | CIS                 | 8.11E-22 | 1.93E-12  | 1.39E-10 | 0.441 |                                                                  |
| ATDNA1T9A | Chr3:18568631-18568633   | Chr3-18568632 | TRANS               | 1.35E-08 | NA        | 1.67E-07 | 0.085 | AT3G50060, AT3G50070, AT3G50080, AT3G50090, AT3G50100            |
| ATDNA1T9A | Chr5:8186376-8212656     | Chr5-8206873  | CIS                 | 1.89E-13 | 5.03E-09  | 2.30E-06 | 0.256 |                                                                  |

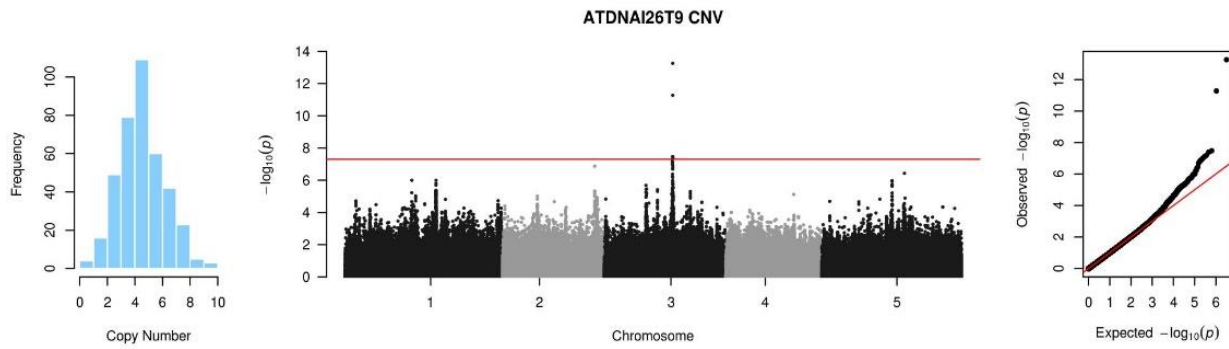

| TE         | GWAS associated interval | Leading SNP   | Type of association | P-value  |           |          | MAF   | Candidate gene(s) |
|------------|--------------------------|---------------|---------------------|----------|-----------|----------|-------|-------------------|
|            |                          |               |                     | Joined   | Worldwide | Sweden   |       |                   |
| ATDNAI26T9 | Chr3:13244967-13245592   | Chr3-13244968 | C/S                 | 5.53E-14 | 1.35E-07  | 3.18E-08 | 0.049 |                   |

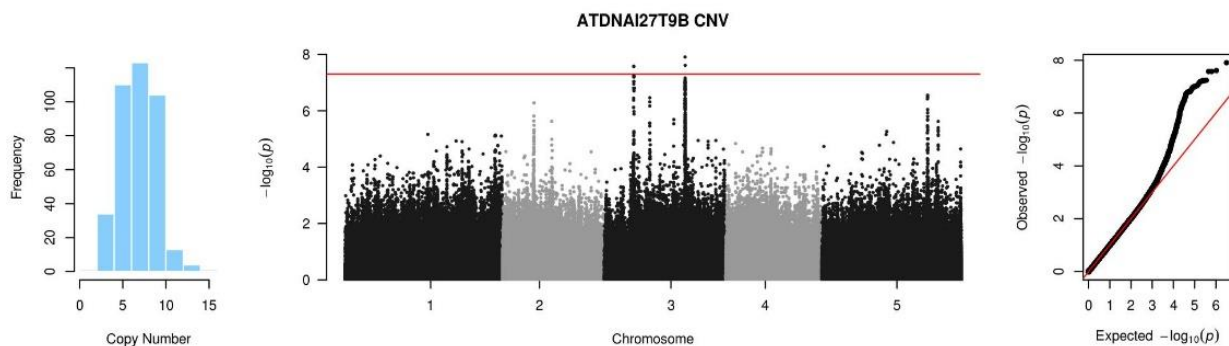

| TE          | GWAS associated interval | Leading SNP   | Type of association | P-value  |           |          | MAF   | Candidate gene(s)                                                                                                       |
|-------------|--------------------------|---------------|---------------------|----------|-----------|----------|-------|-------------------------------------------------------------------------------------------------------------------------|
|             |                          |               |                     | Joined   | Worldwide | Sweden   |       |                                                                                                                         |
| ATDNAI27T9B | Chr3:15617514-15642531   | Chr3-5699617  | TRANS               | 2.67E-08 | 9.60E-07  | NA       | 0.069 | AT3G16700, AT3G16710, AT3G16712, AT3G16720, AT3G16730, AT3G16740, AT3G16750, AT3G16760, AT3G16770, AT3G16780, AT3G16785 |
| ATDNAI27T9B | Chr3:5699616-5707384     | Chr3-15617515 | C/S                 | 1.24E-08 | 3.55E-05  | 1.92E-04 | 0.326 |                                                                                                                         |

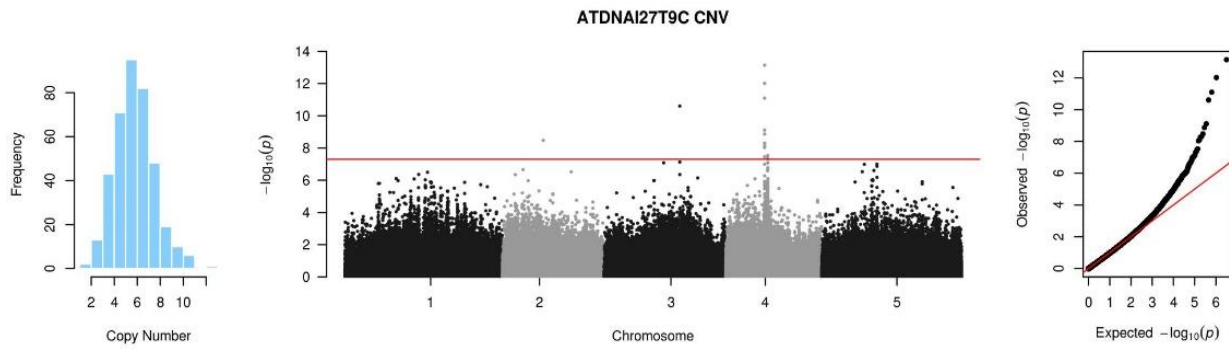

| TE          | GWAS associated interval | Leading SNP   | Type of association | P-value  |           |          | MAF   | Candidate gene(s)                                     |
|-------------|--------------------------|---------------|---------------------|----------|-----------|----------|-------|-------------------------------------------------------|
|             |                          |               |                     | Joined   | Worldwide | Sweden   |       |                                                       |
| ATDNAI27T9C | Chr2:7907427-7907429     | Chr2-7907428  | TRANS               | 3.32E-09 | NA        | 5.06E-07 | 0.172 | AT2G18160, AT2G18162, AT2G18170, AT2G18180, AT2G18190 |
| ATDNAI27T9C | Chr3:14600022-14600024   | Chr3-14600023 | TRANS               | 2.47E-11 | 4.57E-06  | 6.48E-07 | 0.285 | AT3G42473, AT3G42475                                  |
| ATDNAI27T9C | Chr4:7524860-7526558     | Chr4-7526557  | CIS                 | 7.75E-10 | 1.33E-07  | 4.76E-05 | 0.008 |                                                       |
| ATDNAI27T9C | Chr4:8141395-8141397     | Chr4-8141396  | TRANS               | 2.92E-08 | 3.21E-05  | 6.42E-05 | 0.177 | <b>AT4G14140 (MET2a)</b>                              |

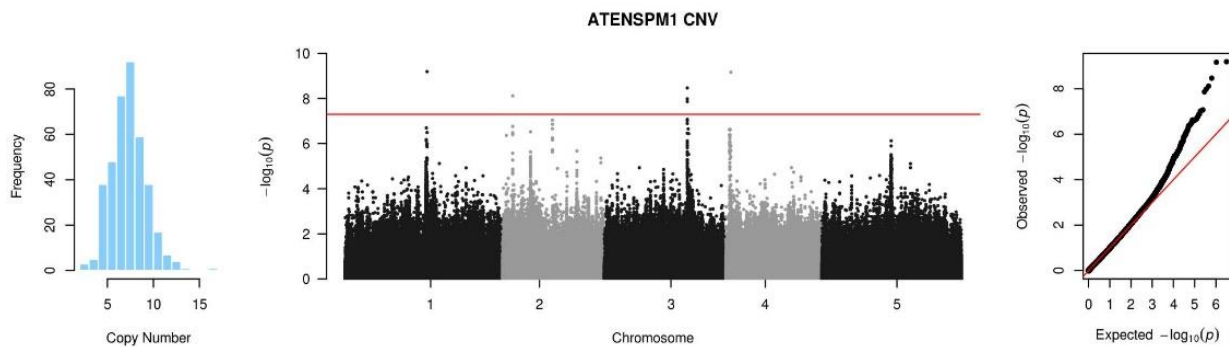

| TE       | GWAS associated interval | Leading SNP   | Type of association | P-value  |           |          | MAF   | Candidate gene(s)    |
|----------|--------------------------|---------------|---------------------|----------|-----------|----------|-------|----------------------|
|          |                          |               |                     | Joined   | Worldwide | Sweden   |       |                      |
| ATENSPM1 | Chr1:15867785-15867787   | Chr1-15867786 | CIS                 | 6.43E-10 | 1.88E-05  | 1.44E-05 | 0.426 |                      |
| ATENSPM1 | Chr2:2006442-2006444     | Chr2-2006443  | TRANS               | 7.60E-09 | 1.88E-02  | 7.48E-07 | 0.121 | AT2G05500, AT2G05510 |
| ATENSPM1 | Chr3:16050194-16050498   | Chr3-16050497 | TRANS               | 3.41E-09 | NA        | 4.11E-08 | 0.167 | AT3G44400            |
| ATENSPM1 | Chr4:1022686-1022688     | Chr4-1022687  | CIS                 | 6.78E-10 | 1.76E-06  | 1.24E-04 | 0.313 |                      |

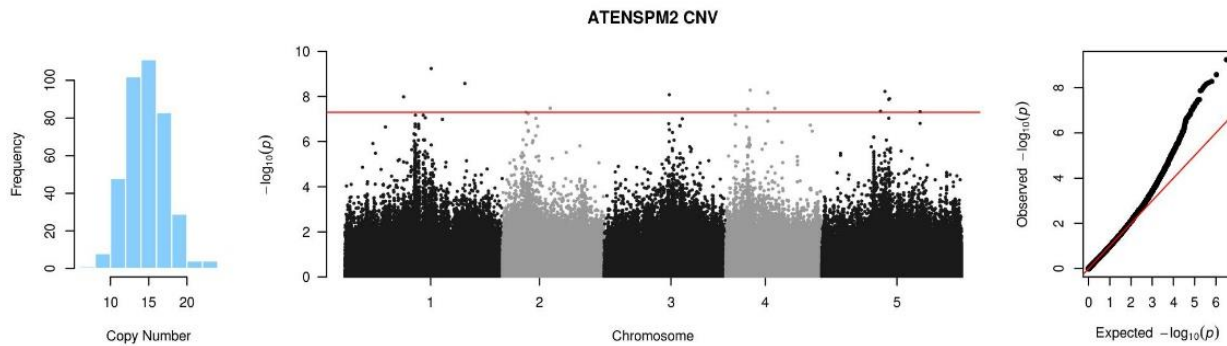

| TE       | GWAS associated interval | Leading SNP   | Type of association | P-value  |           |          | MAF   | Candidate gene(s)                                                           |
|----------|--------------------------|---------------|---------------------|----------|-----------|----------|-------|-----------------------------------------------------------------------------|
|          |                          |               |                     | Joined   | Worldwide | Sweden   |       |                                                                             |
| ATENSPM2 | Chr1:16675002-16675004   | Chr1-16675003 | TRANS               | 5.75E-10 | 5.97E-07  | 5.20E-03 | 0.359 | <b>AT1G43950 (ARF23)</b>                                                    |
| ATENSPM2 | Chr1:23181917-23181919   | Chr1-23181918 | TRANS               | 2.64E-09 | 1.56E-07  | 4.40E-02 | 0.195 | AT1G62570, AT1G62580, AT1G62590, AT1G62600, AT1G62610, AT1G62620, AT1G62630 |
| ATENSPM2 | Chr3:12566674-12566676   | Chr3-12566675 | TRANS               | 8.39E-09 | 4.71E-07  | NA       | 0.218 | .                                                                           |
| ATENSPM2 | Chr4:4767946-4767948     | Chr4-4767947  | TRANS               | 5.25E-09 | 9.69E-08  | 2.00E-02 | 0.321 | .                                                                           |
| ATENSPM2 | Chr4:8148250-8148252     | Chr4-8148251  | TRANS               | 6.85E-09 | 1.27E-08  | NA       | 0.108 | <b>AT4G14140 (MET2a)</b>                                                    |
| ATENSPM2 | Chr5:12205883-12205885   | Chr5-12205884 | TRANS               | 5.99E-09 | 3.63E-08  | 1.42E-01 | 0.282 | .                                                                           |
| ATENSPM2 | Chr5:12947984-13085062   | Chr5-13085061 | TRANS               | 1.26E-08 | 1.16E-06  | 4.61E-03 | 0.287 | AT5G34780, AT5G34828, AT5G34829, AT5G34830, AT5G34869, AT5G34871            |

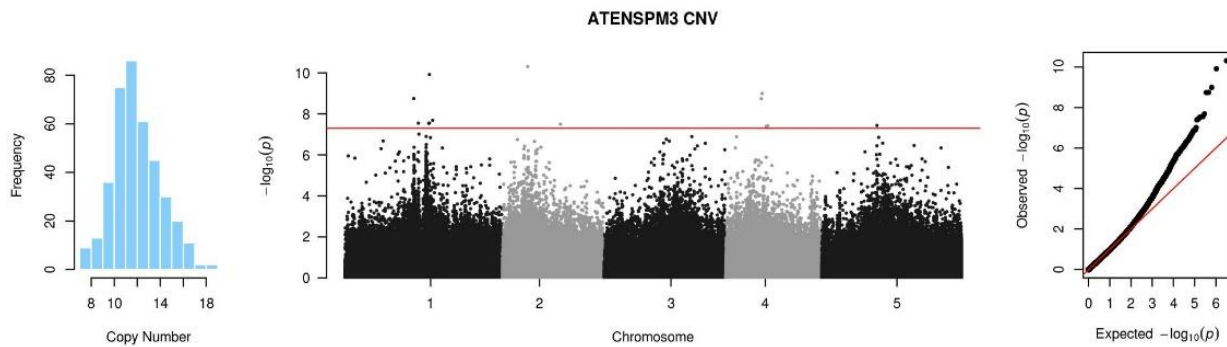

| TE       | GWAS associated interval | Leading SNP   | Type of association | P-value  |           |          | MAF   | Candidate gene(s)                                                           |
|----------|--------------------------|---------------|---------------------|----------|-----------|----------|-------|-----------------------------------------------------------------------------|
|          |                          |               |                     | Joined   | Worldwide | Sweden   |       |                                                                             |
| ATENSPM3 | Chr1:13288207-13288209   | Chr1-13288208 | TRANS               | 1.80E-09 | 5.09E-09  | NA       | 0.277 | AT1G35780                                                                   |
| ATENSPM3 | Chr1:14186622-14186624   | Chr1-14186623 | TRANS               | 2.81E-08 | 3.97E-07  | 1.79E-02 | 0.377 | AT1G37150, AT1G37162                                                        |
| ATENSPM3 | Chr1:16182880-16182882   | Chr1-16182881 | TRANS               | 2.85E-08 | 6.45E-07  | 4.20E-03 | 0.423 | AT1G43040                                                                   |
| ATENSPM3 | Chr1:16344111-16344119   | Chr1-16344112 | TRANS               | 1.22E-10 | 2.92E-12  | 7.14E-01 | 0.310 | AT1G43310                                                                   |
| ATENSPM3 | Chr1:16962663-16962665   | Chr1-16962664 | TRANS               | 2.04E-08 | 1.51E-07  | 6.56E-03 | 0.226 | AT1G44900                                                                   |
| ATENSPM3 | Chr2:4906414-4906416     | Chr2-4906415  | CIS                 | 4.88E-11 | 2.31E-07  | 1.79E-03 | 0.374 |                                                                             |
| ATENSPM3 | Chr4:6880307-6880309     | Chr4-6880308  | TRANS               | 1.82E-09 | 5.90E-09  | 3.96E-02 | 0.479 | AT4G11290, AT4G11300, AT4G11310, AT4G11320                                  |
| ATENSPM3 | Chr4:7062242-7062244     | Chr4-7062243  | TRANS               | 1.02E-09 | 4.21E-09  | NA       | 0.223 | AT4G11670, AT4G11680, AT4G11690, AT4G11700, AT4G11720, AT4G11730, AT4G11740 |

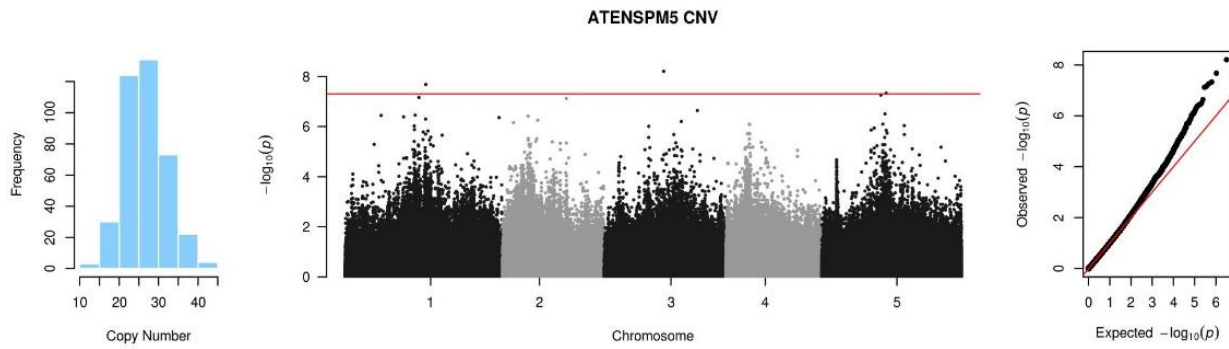

| TE       | GWAS associated interval | Leading SNP   | Type of association | P-value  |           |        | MAF   | Candidate gene(s) |
|----------|--------------------------|---------------|---------------------|----------|-----------|--------|-------|-------------------|
|          |                          |               |                     | Joined   | Worldwide | Sweden |       |                   |
| ATENSPM5 | Chr1:15612278-15612280   | Chr1-15612279 | TRANS               | 2.10E-08 | 3.11E-08  | NA     | 0.187 | AT1G41830         |
| ATENSPM5 | Chr3:11495299-11495301   | Chr3-11495300 | TRANS               | 6.22E-09 | 8.24E-10  | NA     | 0.228 | AT3G29644         |

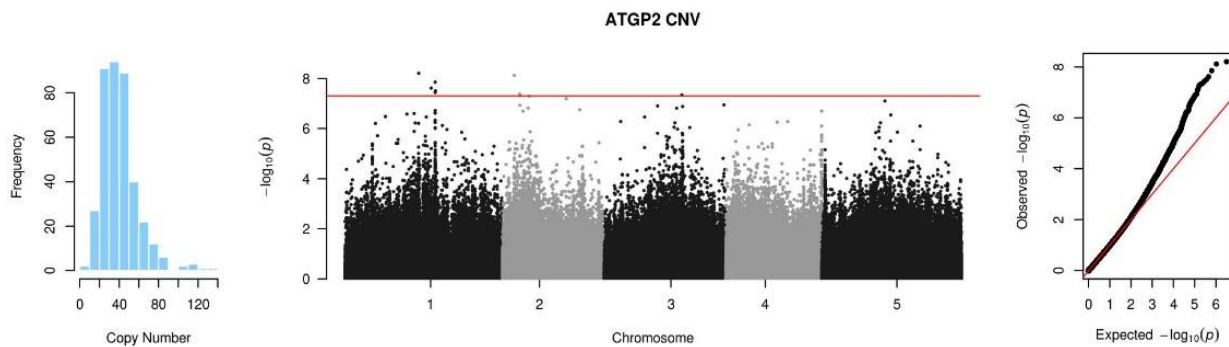

| TE    | GWAS associated interval | Leading SNP   | Type of association | P-value  |           |          | MAF   | Candidate gene(s)                                                |
|-------|--------------------------|---------------|---------------------|----------|-----------|----------|-------|------------------------------------------------------------------|
|       |                          |               |                     | Joined   | Worldwide | Sweden   |       |                                                                  |
| ATGP2 | Chr1:14263097-14263099   | Chr1-14263098 | TRANS               | 6.21E-09 | 1.25E-08  | NA       | 0.244 | .                                                                |
| ATGP2 | Chr1:16675002-16675004   | Chr1-16675003 | TRANS               | 2.42E-08 | 6.62E-09  | 2.84E-01 | 0.359 | AT1G43950 (ARF23)                                                |
| ATGP2 | Chr1:17440198-17440200   | Chr1-17440199 | TRANS               | 1.40E-08 | 8.34E-07  | 8.78E-04 | 0.064 | AT1G47497, AT1G47500, AT1G47510, AT1G47497, AT1G47500, AT1G47510 |
| ATGP2 | Chr2:2290684-2290686     | Chr2-2290685  | TRANS               | 7.61E-09 | 2.78E-06  | 2.23E-03 | 0.295 | AT2G05940                                                        |

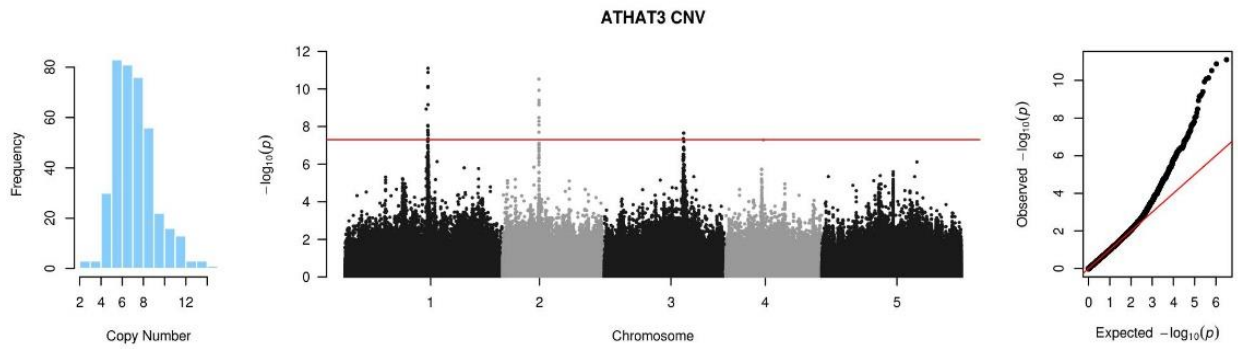

| TE     | GWAS associated interval | Leading SNP   | Type of association | P-value  |           |          | MAF   | Candidate gene(s)                          |
|--------|--------------------------|---------------|---------------------|----------|-----------|----------|-------|--------------------------------------------|
|        |                          |               |                     | Joined   | Worldwide | Sweden   |       |                                            |
| ATHAT3 | Chr1:16036245-16036886   | Chr1-16036246 | TRANS               | 8.67E-09 | 6.36E-06  | 4.88E-05 | 0.282 | AT1G42680                                  |
| ATHAT3 | Chr1:16070455-16094668   | Chr1-16071288 | CIS                 | 7.91E-12 | 5.48E-11  | NA       | 0.121 |                                            |
| ATHAT3 | Chr2:7066692-7073458     | Chr2-7067625  | CIS                 | 2.98E-11 | 5.18E-06  | 1.21E-06 | 0.364 |                                            |
| ATHAT3 | Chr3:15351283-15351287   | Chr3-15351284 | TRANS               | 2.23E-08 | NA        | 1.09E-07 | 0.108 | AT3G43420, AT3G43430, AT3G43431, AT3G43432 |

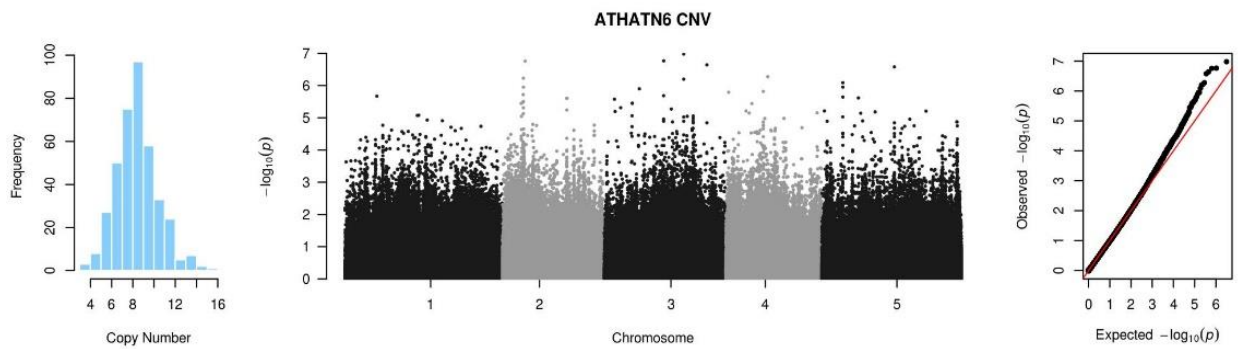

| TE | GWAS associated interval | Leading SNP | Type of association | P-value |           |        | MAF | Candidate gene(s) |
|----|--------------------------|-------------|---------------------|---------|-----------|--------|-----|-------------------|
|    |                          |             |                     | Joined  | Worldwide | Sweden |     |                   |
|    |                          |             |                     |         |           |        |     |                   |

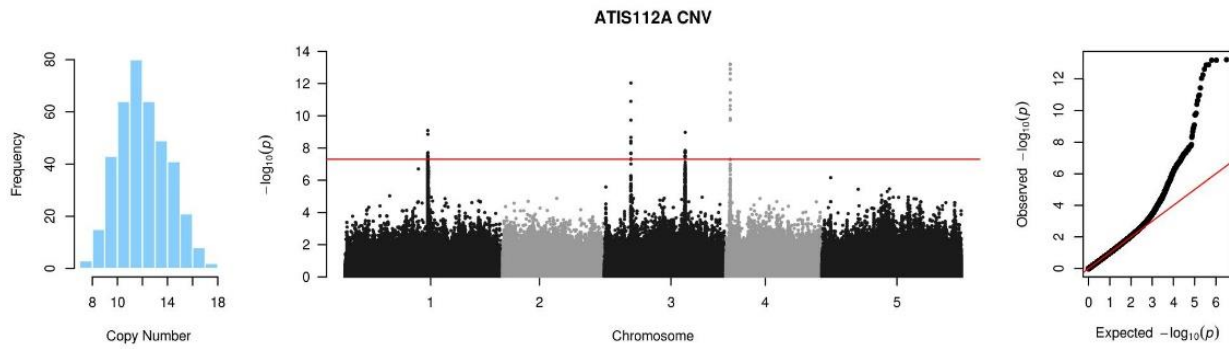

| TE       | GWAS associated interval | Leading SNP   | Type of association | <i>P-value</i> |           |          | MAF   | Candidate gene(s) |
|----------|--------------------------|---------------|---------------------|----------------|-----------|----------|-------|-------------------|
|          |                          |               |                     | Joined         | Worldwide | Sweden   |       |                   |
| ATIS112A | Chr1:15995694-16067310   | Chr1-16031743 | <i>CIS</i>          | 8.18E-10       | 8.97E-06  | 6.02E-06 | 0.336 |                   |
| ATIS112A | Chr3:15617514-15642531   | Chr3-5157268  | <i>CIS</i>          | 9.19E-13       | 4.82E-08  | 1.41E-06 | 0.272 |                   |
| ATIS112A | Chr3:5149758-5158701     | Chr3-15642530 | <i>CIS</i>          | 1.06E-09       | 1.70E-06  | 3.94E-04 | 0.436 |                   |
| ATIS112A | Chr4:866297-871018       | Chr4-866304   | <i>CIS</i>          | 6.51E-14       | 3.51E-08  | 1.10E-06 | 0.369 |                   |

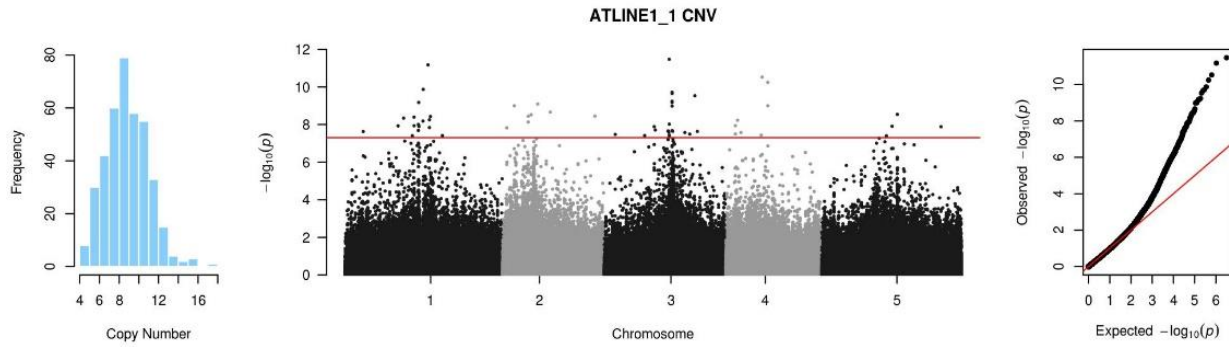

| TE        | GWAS associated interval | Leading SNP   | Type of association | P-value  |           |          | MAF   | Candidate gene(s)                                                                                            |
|-----------|--------------------------|---------------|---------------------|----------|-----------|----------|-------|--------------------------------------------------------------------------------------------------------------|
|           |                          |               |                     | Joined   | Worldwide | Sweden   |       |                                                                                                              |
| ATLINE1_1 | Chr1:3527270-3527272     | Chr1-3527271  | TRANS               | 2.35E-08 | 1.22E-05  | 5.89E-05 | 0.121 | AT1G10640, AT1G10650, AT1G10652, AT1G10657, AT1G10660, AT1G10670                                             |
| ATLINE1_1 | Chr1:10280562-10280564   | Chr1-10280563 | TRANS               | 1.17E-08 | 2.06E-09  | NA       | 0.256 | AT1G29350, AT1G29355, AT1G29357, AT1G29370, AT1G29380, AT1G29390, AT1G29395, AT1G29400                       |
| ATLINE1_1 | Chr1:11339021-11339023   | Chr1-11339022 | TRANS               | 4.56E-09 | 5.86E-07  | NA       | 0.241 | AT1G31650, AT1G31660, AT1G31670, AT1G31690                                                                   |
| ATLINE1_1 | Chr1:13354892-13365991   | Chr1-13354893 | TRANS               | 4.00E-09 | 1.33E-07  | 2.06E-03 | 0.441 | AT1G35900, AT1G35910                                                                                         |
| ATLINE1_1 | Chr1:14186622-14186631   | Chr1-14186630 | TRANS               | 9.81E-09 | 3.12E-10  | 1.34E-01 | 0.372 | AT1G37150, AT1G37162                                                                                         |
| ATLINE1_1 | Chr1:14263097-14313946   | Chr1-14263098 | TRANS               | 6.65E-10 | 1.95E-09  | NA       | 0.244 | AT1G38065, AT1G38131                                                                                         |
| ATLINE1_1 | Chr1:15087421-16344119   | Chr1-16073092 | TRANS               | 6.68E-12 | 4.31E-10  | NA       | 0.228 | .                                                                                                            |
| ATLINE1_1 | Chr1:16518106-16518108   | Chr1-16518107 | TRANS               | 3.77E-09 | 1.02E-08  | NA       | 0.397 | AT1G43730                                                                                                    |
| ATLINE1_1 | Chr2:859602-859604       | Chr2-859603   | TRANS               | 1.49E-08 | 2.10E-05  | 2.80E-03 | 0.497 | AT2G02930, AT2G02950, AT2G02955, AT2G02960, AT2G02970, AT2G02980                                             |
| ATLINE1_1 | Chr2:2304138-2304140     | Chr2-2304139  | TRANS               | 1.00E-09 | 5.01E-10  | 2.09E-01 | 0.374 | AT2G05970                                                                                                    |
| ATLINE1_1 | Chr2:4999266-4999451     | Chr2-4999267  | TRANS               | 7.35E-09 | 6.20E-08  | NA       | 0.105 | AT2G12400                                                                                                    |
| ATLINE1_1 | Chr2:5558376-5558378     | Chr2-5558377  | TRANS               | 3.01E-09 | 1.30E-07  | 1.25E-02 | 0.362 | AT2G13370                                                                                                    |
| ATLINE1_1 | Chr2:6822456-6822458     | Chr2-6822457  | TRANS               | 8.04E-10 | 1.88E-10  | NA       | 0.328 | AT2G15620, AT2G15630, AT2G15640, AT2G15660, AT2G15670, AT2G15680, AT2G15690                                  |
| ATLINE1_1 | Chr2:9281325-9281327     | Chr2-9281326  | TRANS               | 2.18E-09 | 8.82E-09  | NA       | 0.182 | AT2G21710, AT2G21720, AT2G21725, AT2G21727, AT2G21730, AT2G21740, AT2G21750, AT2G21760, AT2G21770, AT2G21780 |
| ATLINE1_1 | Chr2:17904473-17904475   | Chr2-17904474 | TRANS               | 3.57E-09 | 3.11E-07  | 2.18E-03 | 0.077 | AT2G43018, AT2G43020, AT2G43030, AT2G43040, AT2G43050, AT2G43060, AT2G43070                                  |
| ATLINE1_1 | Chr3:9643029-9643031     | Chr3-9643030  | TRANS               | 1.29E-08 | 2.95E-08  | 4.83E-03 | 0.487 | AT3G26290, AT3G26300, AT3G26310, AT3G26320, AT3G26330, AT3G26340                                             |
| ATLINE1_1 | Chr3:9859836-9859838     | Chr3-9859837  | TRANS               | 1.95E-08 | 1.98E-05  | 3.05E-05 | 0.474 | AT3G26780, AT3G26782, AT3G26790, AT3G26800, AT3G26810, AT3G26812                                             |
| ATLINE1_1 | Chr3:12354058-12354060   | Chr3-12354059 | TRANS               | 2.18E-08 | 2.92E-08  | 6.09E-03 | 0.438 | AT3G30720, AT3G30725, AT3G30730                                                                              |
| ATLINE1_1 | Chr3:12462649-12566676   | Chr3-12536058 | TRANS               | 3.37E-12 | 2.11E-10  | 3.02E-02 | 0.256 | AT3G30778, AT3G30805, AT3G30820                                                                              |
| ATLINE1_1 | Chr3:13099797-13104190   | Chr3-13099798 | CIS                 | 6.54E-10 | 1.71E-05  | 8.91E-06 | 0.395 |                                                                                                              |
| ATLINE1_1 | Chr3:13246999-13247001   | Chr3-13247000 | TRANS               | 2.29E-08 | 3.75E-04  | 8.69E-06 | 0.341 | AT3G32280                                                                                                    |
| ATLINE1_1 | Chr3:15588932-15588934   | Chr3-15588933 | TRANS               | 2.66E-08 | 1.11E-06  | NA       | 0.151 | AT3G43682                                                                                                    |
| ATLINE1_1 | Chr3:17519634-17519636   | Chr3-17519635 | TRANS               | 2.94E-10 | 5.92E-10  | NA       | 0.269 | AT3G47510, AT3G47520, AT3G47530, AT3G47540, AT3G47543, AT3G47550, AT3G47560, AT3G47570                       |
| ATLINE1_1 | Chr3:17978865-17978867   | Chr3-17978866 | TRANS               | 2.33E-08 | 3.50E-07  | NA       | 0.210 | AT3G48515, AT3G48520, AT3G48530                                                                              |
| ATLINE1_1 | Chr4:1891430-1891432     | Chr4-1891431  | TRANS               | 1.15E-08 | 1.10E-08  | 4.33E-01 | 0.262 | AT4G03960, AT4G03965                                                                                         |
| ATLINE1_1 | Chr4:2298769-2298771     | Chr4-2298770  | TRANS               | 5.88E-09 | 7.50E-09  | NA       | 0.310 | AT4G04570, AT4G04580                                                                                         |
| ATLINE1_1 | Chr4:2960759-2960761     | Chr4-2960760  | TRANS               | 2.66E-08 | 2.79E-08  | NA       | 0.144 | AT4G05612                                                                                                    |
| ATLINE1_1 | Chr4:7062242-7062244     | Chr4-7062243  | TRANS               | 2.97E-11 | 1.43E-11  | NA       | 0.223 | AT4G11670, AT4G11680, AT4G11690, AT4G11700, AT4G11720, AT4G11730, AT4G11740                                  |
| ATLINE1_1 | Chr4:8148250-8148313     | Chr4-8148312  | TRANS               | 5.72E-11 | 7.55E-11  | NA       | 0.226 | <b>AT4G14140 (MET2a)</b>                                                                                     |
| ATLINE1_1 | Chr5:13603137-13603139   | Chr5-13603138 | TRANS               | 1.22E-08 | 4.04E-09  | 2.49E-02 | 0.387 | AT5G35375, AT5G35380, AT5G35390, AT5G35400, AT5G35405, AT5G35407                                             |
| ATLINE1_1 | Chr5:14590846-14590848   | Chr5-14590847 | TRANS               | 2.86E-09 | 1.00E-07  | 1.76E-02 | 0.149 | AT5G36940, AT5G36950, AT5G36960, AT5G36940, AT5G36950, AT5G36960                                             |
| ATLINE1_1 | Chr5:23050034-23050036   | Chr5-23050035 | TRANS               | 1.31E-08 | 1.68E-07  | 1.38E-03 | 0.292 | AT5G56960, AT5G56970, AT5G56975, AT5G56980                                                                   |

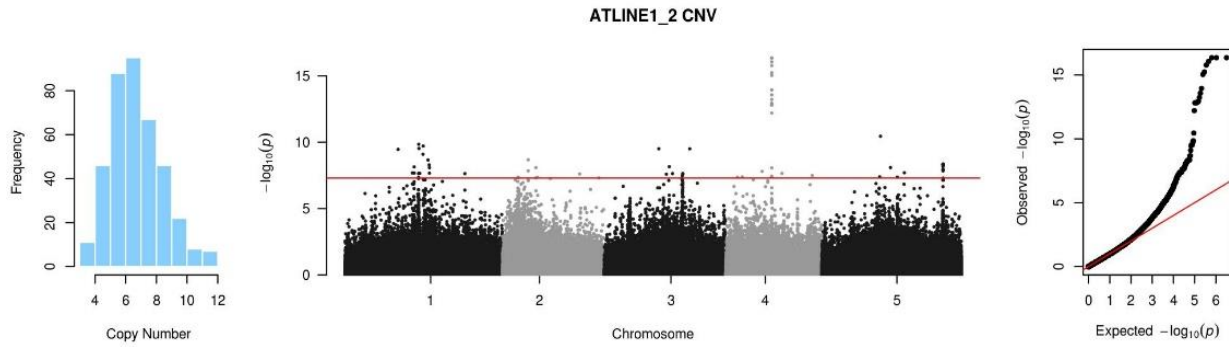

| TE        | GWAS associated interval | Leading SNP   | Type of association | P-value  |           |          | MAF   | Candidate gene(s)                                                                      |
|-----------|--------------------------|---------------|---------------------|----------|-----------|----------|-------|----------------------------------------------------------------------------------------|
|           |                          |               |                     | Joined   | Worldwide | Sweden   |       |                                                                                        |
| ATLINE1_2 | Chr1:10280562-10280564   | Chr1-10280563 | TRANS               | 3.50E-10 | 5.19E-11  | NA       | 0.256 | AT1G29350, AT1G29355, AT1G29357, AT1G29370, AT1G29380, AT1G29390, AT1G29395, AT1G29400 |
| ATLINE1_2 | Chr1:13013843-13013845   | Chr1-13013844 | TRANS               | 2.08E-08 | 3.80E-09  | 2.00E-01 | 0.297 | AT1G35375, AT1G35400                                                                   |
| ATLINE1_2 | Chr1:13381001-13401451   | Chr1-13381002 | TRANS               | 7.29E-09 | 1.52E-09  | NA       | 0.218 | .                                                                                      |
| ATLINE1_2 | Chr1:14225247-16344119   | Chr1-14263098 | TRANS               | 1.42E-10 | 1.05E-10  | NA       | 0.244 | .                                                                                      |
| ATLINE1_2 | Chr1:23181917-23181919   | Chr1-23181918 | TRANS               | 2.30E-08 | 1.81E-06  | 4.37E-02 | 0.195 | AT1G62570, AT1G62580, AT1G62590, AT1G62600, AT1G62610, AT1G62620, AT1G62630            |
| ATLINE1_2 | Chr2:4997864-4999451     | Chr2-4999450  | TRANS               | 2.10E-09 | 1.38E-11  | NA       | 0.131 | AT2G12400                                                                              |
| ATLINE1_2 | Chr2:6477378-6477380     | Chr2-6477379  | TRANS               | 8.13E-09 | 6.46E-11  | 2.74E-01 | 0.390 | AT2G15000, AT2G15010                                                                   |
| ATLINE1_2 | Chr2:14932292-14932294   | Chr2-14932293 | TRANS               | 2.43E-08 | 6.27E-08  | NA       | 0.392 | AT2G35520, AT2G35530, AT2G35540, AT2G35550, AT2G35580, AT2G35585, AT2G35600            |
| ATLINE1_2 | Chr3:10542191-10542193   | Chr3-10542192 | TRANS               | 3.08E-10 | 2.25E-07  | 6.95E-05 | 0.441 | AT3G28243, AT3G28250, AT3G28260, AT3G28270, AT3G28280, AT3G28290, AT3G28291            |
| ATLINE1_2 | Chr3:12001880-12001882   | Chr3-12001881 | TRANS               | 2.56E-08 | 7.67E-11  | 6.58E-01 | 0.233 | AT3G30387, AT3G30391                                                                   |
| ATLINE1_2 | Chr3:12566674-12566676   | Chr3-12566675 | TRANS               | 6.91E-09 | 2.67E-09  | NA       | 0.218 | .                                                                                      |
| ATLINE1_2 | Chr3:13199634-13199636   | Chr3-13199635 | TRANS               | 2.29E-08 | 9.21E-07  | NA       | 0.315 | .                                                                                      |
| ATLINE1_2 | Chr3:15178231-15178298   | Chr3-15178232 | CIS                 | 2.48E-08 | 6.54E-05  | 1.14E-04 | 0.090 | .                                                                                      |
| ATLINE1_2 | Chr3:16511648-16511650   | Chr3-16511649 | TRANS               | 3.10E-10 | 1.07E-09  | 3.29E-02 | 0.200 | AT3G45100, AT3G45110, AT3G45130                                                        |
| ATLINE1_2 | Chr4:7062242-7062244     | Chr4-7062243  | TRANS               | 1.57E-08 | 8.76E-10  | NA       | 0.223 | AT4G11670, AT4G11680, AT4G11690, AT4G11700, AT4G11720, AT4G11730, AT4G11740            |
| ATLINE1_2 | Chr4:10898110-10898112   | Chr4-10898111 | TRANS               | 2.23E-08 | 6.07E-11  | 4.54E-02 | 0.249 | AT4G20140, AT4G20150, AT4G20160, AT4G20170, AT4G20190                                  |
| ATLINE1_2 | Chr5:11344169-11344171   | Chr5-11344170 | TRANS               | 3.54E-11 | 2.05E-10  | 1.02E-02 | 0.408 | .                                                                                      |
| ATLINE1_2 | Chr5:13289118-13289120   | Chr5-13289119 | TRANS               | 8.00E-09 | 2.54E-06  | NA       | 0.059 | .                                                                                      |
| ATLINE1_2 | Chr5:15962104-15962106   | Chr5-15962105 | TRANS               | 1.99E-08 | 2.96E-07  | 3.04E-02 | 0.156 | AT5G39860, AT5G39865, AT5G39870, AT5G39880                                             |

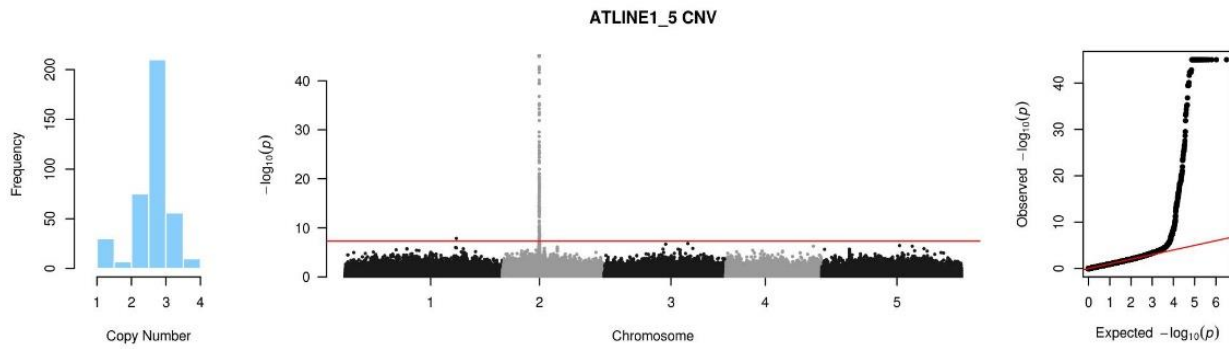

| TE        | GWAS associated interval | Leading SNP   | Type of association | P-value  |           |          | MAF   | Candidate gene(s)                                                |
|-----------|--------------------------|---------------|---------------------|----------|-----------|----------|-------|------------------------------------------------------------------|
|           |                          |               |                     | Joined   | Worldwide | Sweden   |       |                                                                  |
| ATLINE1_5 | Chr1:21540447-21540449   | Chr1-21540448 | TRANS               | 1.35E-08 | 6.54E-05  | 8.67E-05 | 0.297 | AT1G58150, AT1G58160, AT1G58170, AT1G58180, AT1G58190, AT1G58200 |
| ATLINE1_5 | Chr2:7057592-7215595     | Chr2-7106640  | CIS                 | 8.97E-46 | 1.84E-35  | NA       | 0.082 |                                                                  |

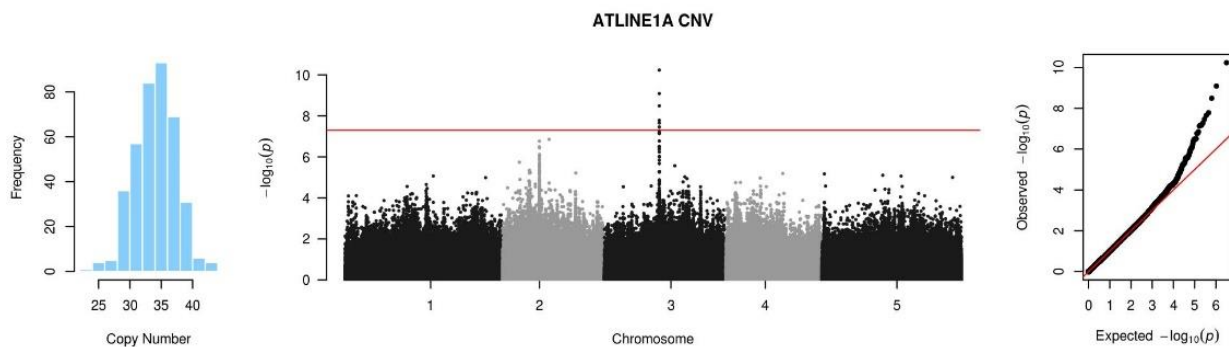

| TE       | GWAS associated interval | Leading SNP   | Type of association | P-value  |           |          | MAF   | Candidate gene(s) |
|----------|--------------------------|---------------|---------------------|----------|-----------|----------|-------|-------------------|
|          |                          |               |                     | Joined   | Worldwide | Sweden   |       |                   |
| ATLINE1A | Chr3:10642015-10645602   | Chr3-10642086 | C/S                 | 5.84E-11 | 3.18E-08  | 4.47E-04 | 0.459 |                   |

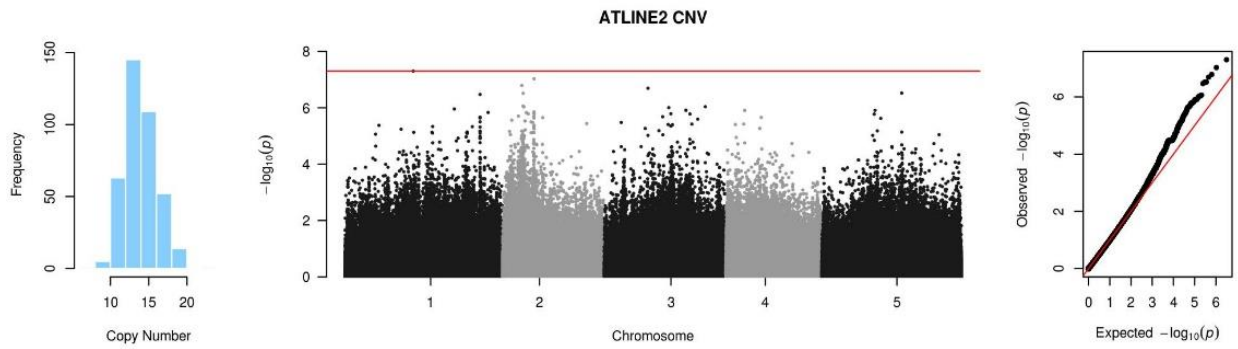

| TE | GWAS associated interval | Leading SNP | Type of association | P-value |           |        | MAF | Candidate gene(s) |
|----|--------------------------|-------------|---------------------|---------|-----------|--------|-----|-------------------|
|    |                          |             |                     | Joined  | Worldwide | Sweden |     |                   |
|    |                          |             |                     |         |           |        |     |                   |

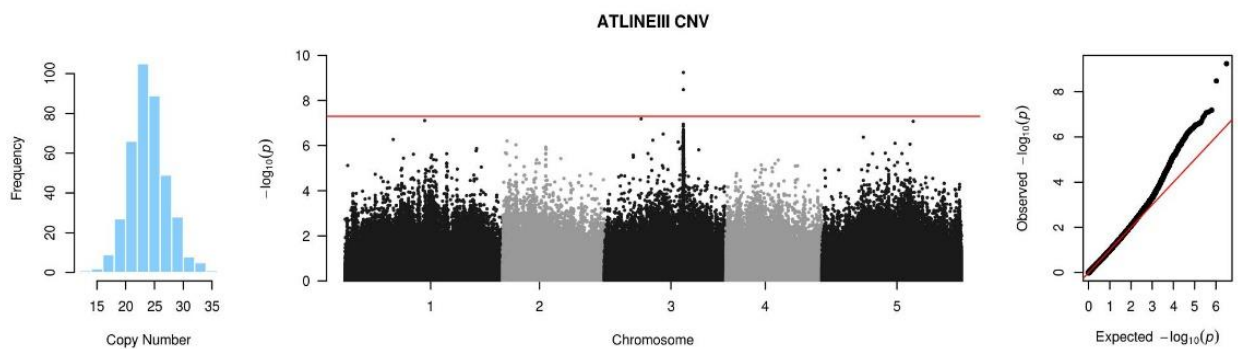

| TE        | GWAS associated interval | Leading SNP   | Type of association | P-value  |           |          | MAF   | Candidate gene(s) |
|-----------|--------------------------|---------------|---------------------|----------|-----------|----------|-------|-------------------|
|           |                          |               |                     | Joined   | Worldwide | Sweden   |       |                   |
| ATLINEIII | Chr3:15295284-15295304   | Chr3-15295303 | TRANS               | 5.73E-10 | 9.29E-07  | 1.25E-04 | 0.282 | AT3G43340         |

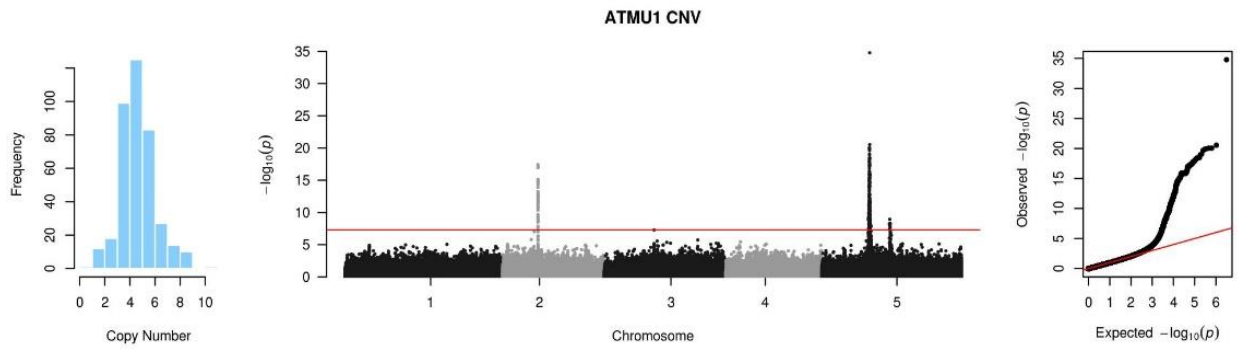

| TE    | GWAS associated interval | Leading SNP   | Type of association | P-value  |           |          | MAF   | Candidate gene(s)                                                                                                       |
|-------|--------------------------|---------------|---------------------|----------|-----------|----------|-------|-------------------------------------------------------------------------------------------------------------------------|
|       |                          |               |                     | Joined   | Worldwide | Sweden   |       |                                                                                                                         |
| ATMU1 | Chr2:6874717-6891586     | Chr2-6882611  | CIS                 | 3.75E-18 | 4.16E-13  | 4.94E-05 | 0.100 |                                                                                                                         |
| ATMU1 | Chr5:9047986-9522014     | Chr5-9260607  | CIS                 | 1.67E-35 | 3.85E-20  | 8.24E-18 | 0.105 |                                                                                                                         |
| ATMU1 | Chr5:13113294-13230580   | Chr5-13113295 | TRANS               | 5.78E-09 | 9.67E-08  | NA       | 0.051 | AT5G34850, AT5G34870, AT5G34881, AT5G34882, AT5G34883, AT5G34885, AT5G34887, AT5G34905, AT5G34908, AT5G34930, AT5G34940 |

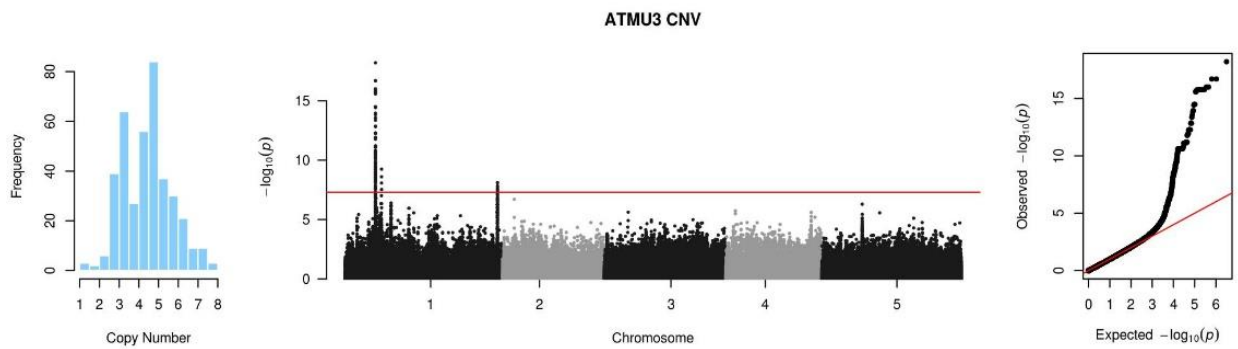

| TE    | GWAS associated interval | Leading SNP   | Type of association | P-value  |           |          | MAF   | Candidate gene(s) |
|-------|--------------------------|---------------|---------------------|----------|-----------|----------|-------|-------------------|
|       |                          |               |                     | Joined   | Worldwide | Sweden   |       |                   |
| ATMU3 | Chr1:7082827-7084454     | Chr1-5905999  | CIS                 | 6.17E-19 | 3.21E-06  | 4.68E-16 | 0.195 |                   |
| ATMU3 | Chr1:29472077-29482991   | Chr1-7082828  | TRANS               | 5.59E-10 | 3.90E-07  | NA       | 0.100 | AT1G20410         |
| ATMU3 | Chr1:5876536-5922541     | Chr1-29472078 | CIS                 | 7.91E-09 | 5.16E-06  | 1.31E-03 | 0.128 |                   |

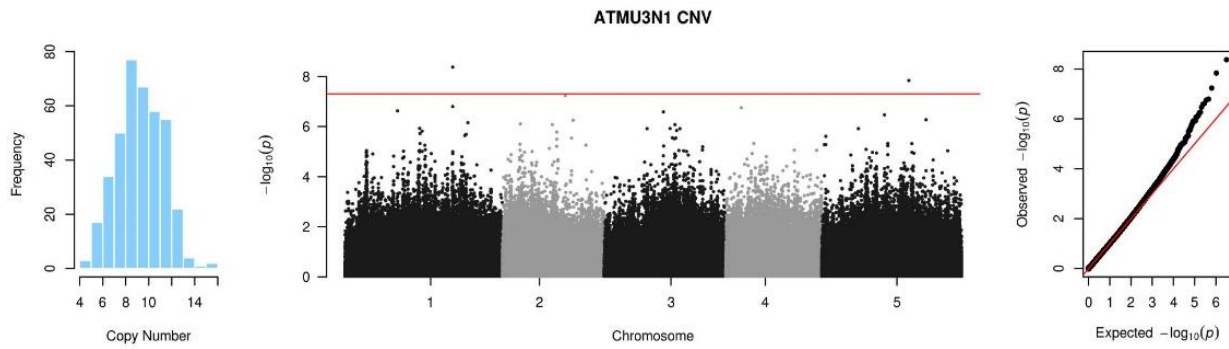

| TE      | GWAS associated interval | Leading SNP   | Type of association | P-value  |           |          | MAF   | Candidate gene(s)                                                                                            |
|---------|--------------------------|---------------|---------------------|----------|-----------|----------|-------|--------------------------------------------------------------------------------------------------------------|
|         |                          |               |                     | Joined   | Worldwide | Sweden   |       |                                                                                                              |
| ATMU3N1 | Chr1:20822319-20822321   | Chr1-20822320 | TRANS               | 4.24E-09 | NA        | 4.27E-06 | 0.382 | AT1G55690, AT1G55700, AT1G55710, AT1G55720, AT1G55730                                                        |
| ATMU3N1 | Chr5:16828813-16828815   | Chr5-16828814 | TRANS               | 1.45E-08 | NA        | 6.87E-06 | 0.177 | AT5G42060, AT5G42070, AT5G42080, AT5G42090, AT5G42092, AT5G42100, AT5G42110, AT5G42120, AT5G42130, AT5G42140 |

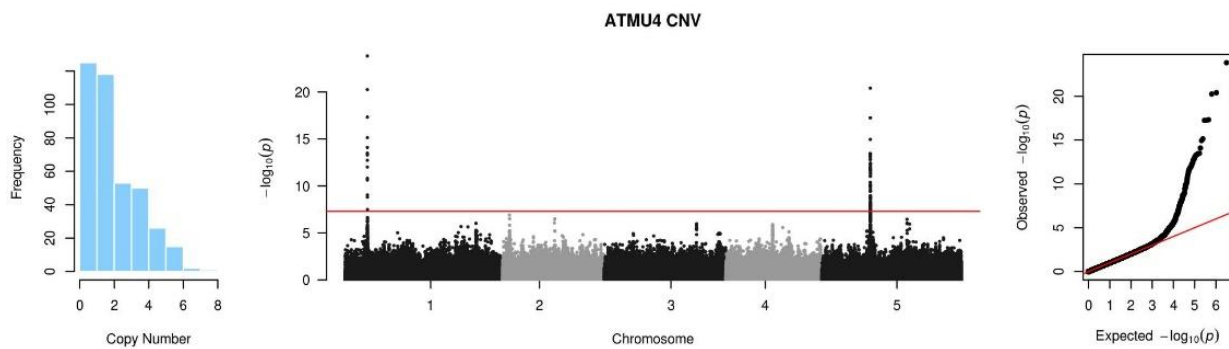

| TE    | GWAS associated interval | Leading SNP  | Type of association | P-value  |           |          | MAF   | Candidate gene(s) |
|-------|--------------------------|--------------|---------------------|----------|-----------|----------|-------|-------------------|
|       |                          |              |                     | Joined   | Worldwide | Sweden   |       |                   |
| ATMU4 | Chr1:4330246-4336252     | Chr1-4332459 | C/S                 | 1.50E-24 | 4.70E-18  | 1.16E-08 | 0.423 |                   |
| ATMU4 | Chr5:9359695-9398879     | Chr5-9374600 | C/S                 | 3.90E-21 | 1.17E-13  | 1.02E-09 | 0.233 |                   |

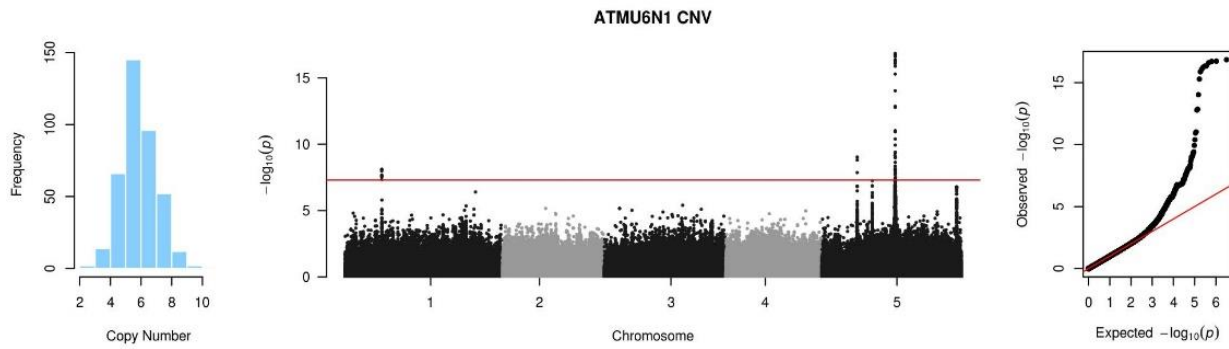

| TE      | GWAS associated interval | Leading SNP   | Type of association | P-value  |           |          | MAF   | Candidate gene(s) |
|---------|--------------------------|---------------|---------------------|----------|-----------|----------|-------|-------------------|
|         |                          |               |                     | Joined   | Worldwide | Sweden   |       |                   |
| ATMU6N1 | Chr1:7112320-7126770     | Chr1-7121312  | C/S                 | 7.92E-09 | 3.10E-06  | 4.33E-04 | 0.051 |                   |
| ATMU6N1 | Chr5:6837888-6840327     | Chr5-6837889  | C/S                 | 9.27E-10 | 1.16E-08  | 8.46E-04 | 0.308 |                   |
| ATMU6N1 | Chr5:14156862-14241288   | Chr5-14196547 | C/S                 | 4.54E-17 | 1.63E-09  | 1.14E-09 | 0.362 |                   |

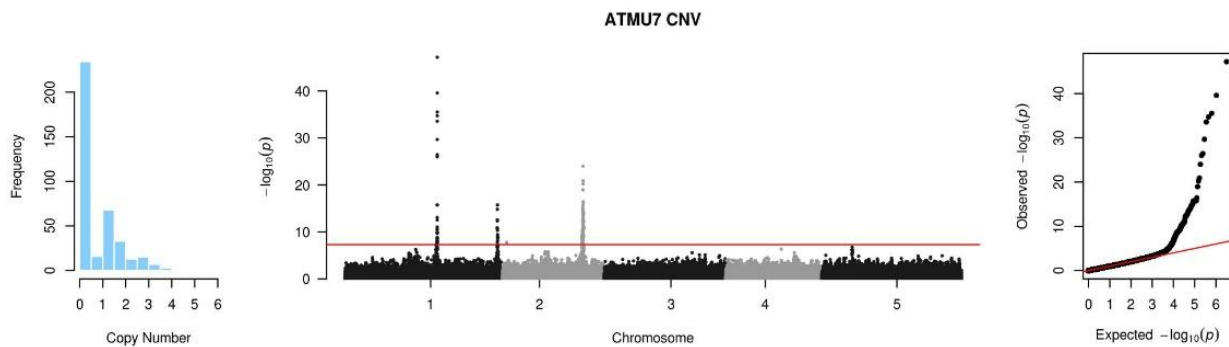

| TE    | GWAS associated interval | Leading SNP   | Type of association | P-value  |           |          | MAF   | Candidate gene(s)                                                                      |
|-------|--------------------------|---------------|---------------------|----------|-----------|----------|-------|----------------------------------------------------------------------------------------|
|       |                          |               |                     | Joined   | Worldwide | Sweden   |       |                                                                                        |
| ATMU7 | Chr1:17827343-17850172   | Chr1-17843917 | C/S                 | 6.51E-48 | 1.04E-30  | 7.78E-20 | 0.195 |                                                                                        |
| ATMU7 | Chr1:29606534-29606536   | Chr1-29606535 | TRANS               | 1.49E-09 | NA        | 1.45E-04 | 0.059 | AT1G78690, AT1G78700, AT1G78710, AT1G78720, AT1G78730, AT1G78740, AT1G78750, AT1G78760 |
| ATMU7 | Chr2:853711-853718       | Chr2-853712   | C/S                 | 1.84E-08 | 9.63E-06  | 6.79E-04 | 0.062 |                                                                                        |
| ATMU7 | Chr2:15400354-15688272   | Chr2-15595243 | C/S                 | 1.02E-10 | NA        | 8.13E-07 | 0.115 |                                                                                        |

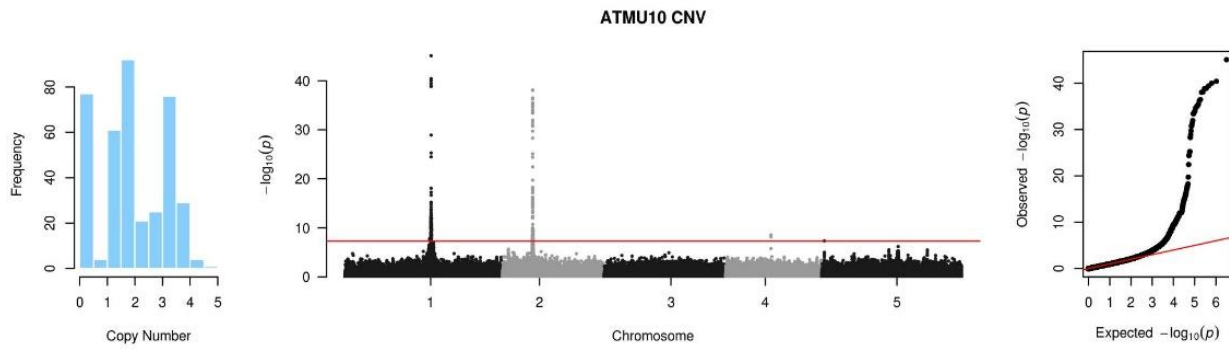

| TE     | GWAS associated interval | Leading SNP   | Type of association | P-value  |           |          | MAF   | Candidate gene(s)               |
|--------|--------------------------|---------------|---------------------|----------|-----------|----------|-------|---------------------------------|
|        |                          |               |                     | Joined   | Worldwide | Sweden   |       |                                 |
| ATMU10 | Chr1:16647700-16712103   | Chr1-16660193 | CIS                 | 8.04E-46 | 2.21E-24  | 1.35E-24 | 0.390 |                                 |
| ATMU10 | Chr2:5835416-5914331     | Chr2-5861365  | CIS                 | 8.62E-39 | 4.42E-21  | 1.17E-18 | 0.441 |                                 |
| ATMU10 | Chr4:8780515-8780544     | Chr4-8780516  | TRANS               | 2.81E-09 | 5.31E-05  | 7.00E-05 | 0.200 | AT4G15360, AT4G15370, AT4G15380 |

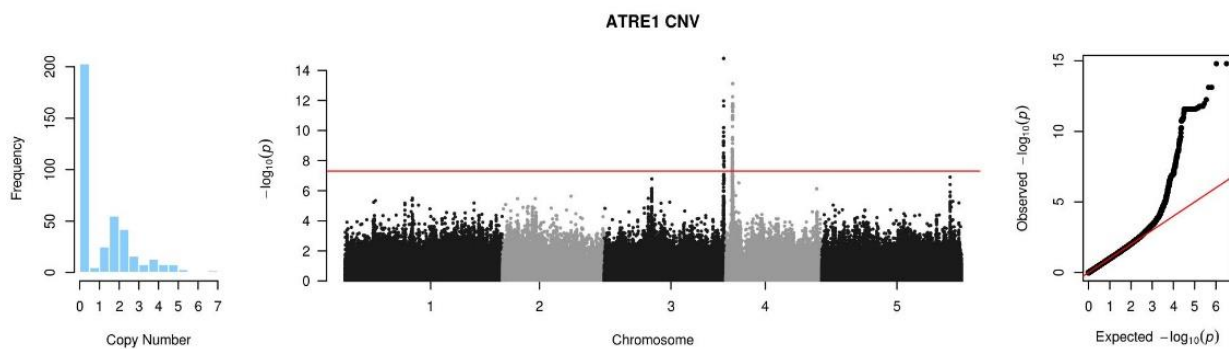

| TE    | GWAS associated interval | Leading SNP   | Type of association | P-value  |           |          | MAF   | Candidate gene(s) |
|-------|--------------------------|---------------|---------------------|----------|-----------|----------|-------|-------------------|
|       |                          |               |                     | Joined   | Worldwide | Sweden   |       |                   |
| ATRE1 | Chr3:23050888-23163122   | Chr3-23079848 | TRANS               | 1.61E-15 | 2.17E-11  | 1.04E-05 | 0.121 | Telomere          |
| ATRE1 | Chr4:1259349-1373555     | Chr4-1363394  | TRANS               | 7.59E-14 | 5.83E-12  | 1.70E-04 | 0.182 | Telomere          |

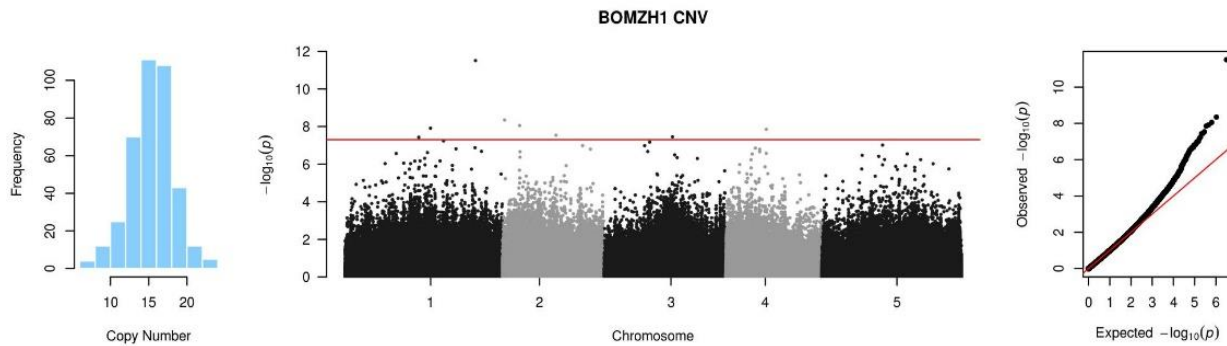

| TE     | GWAS associated interval | Leading SNP   | Type of association | P-value  |           |          | MAF   | Candidate gene(s)                                                           |
|--------|--------------------------|---------------|---------------------|----------|-----------|----------|-------|-----------------------------------------------------------------------------|
|        |                          |               |                     | Joined   | Worldwide | Sweden   |       |                                                                             |
| BOMZH1 | Chr1:16538277-16538279   | Chr1-16538278 | TRANS               | 1.20E-08 | NA        | 1.99E-07 | 0.077 | AT1G43760, AT1G43765                                                        |
| BOMZH1 | Chr1:25245332-25245334   | Chr1-25245333 | TRANS               | 3.10E-12 | NA        | 2.00E-09 | 0.136 | AT1G67390                                                                   |
| BOMZH1 | Chr2:425001-425003       | Chr2-425002   | TRANS               | 4.49E-09 | NA        | 1.88E-06 | 0.056 | AT2G01905, AT2G01910, AT2G01913, AT2G01918, AT2G01920, AT2G01930, AT2G01940 |
| BOMZH1 | Chr2:3336992-3336994     | Chr2-3336993  | TRANS               | 8.84E-09 | NA        | NA       | 0.449 | AT2G07689, AT2G07691, AT2G07692, AT2G07695, AT2G07755, AT2G07792            |
| BOMZH1 | Chr2:10367486-10367488   | Chr2-10367487 | TRANS               | 2.87E-08 | NA        | 3.57E-06 | 0.105 | AT2G24340, AT2G24350, AT2G24360, AT2G24370, AT2G24380, AT2G24390, AT2G24395 |
| BOMZH1 | Chr4:7861176-7861178     | Chr4-7861177  | TRANS               | 1.39E-08 | NA        | 6.15E-06 | 0.054 | AT4G13500, AT4G13505, AT4G13510, AT4G13520, AT4G13530, AT4G13540, AT4G13550 |

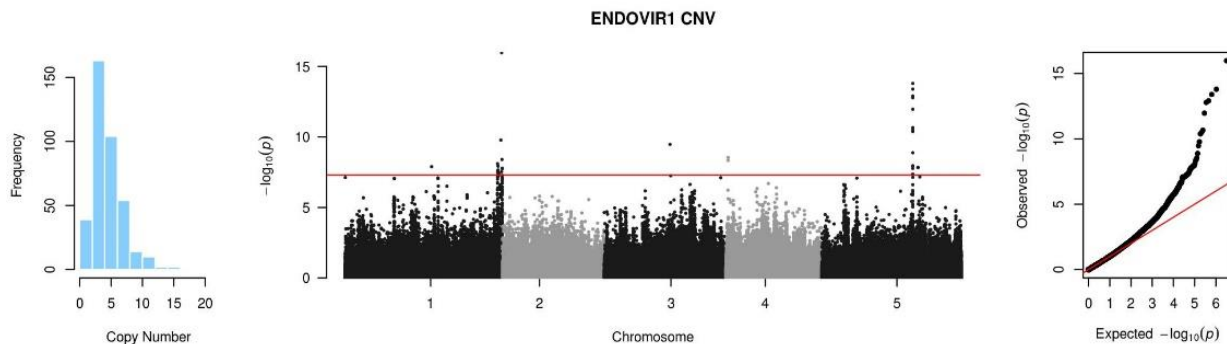

| TE       | GWAS associated interval | Leading SNP   | Type of association | P-value  |           |          | MAF   | Candidate gene(s)                                                                                 |
|----------|--------------------------|---------------|---------------------|----------|-----------|----------|-------|---------------------------------------------------------------------------------------------------|
|          |                          |               |                     | Joined   | Worldwide | Sweden   |       |                                                                                                   |
| ENDOVIR1 | Chr1:16742503-16742505   | Chr1-16742504 | TRANS               | 1.27E-08 | NA        | 7.46E-09 | 0.105 | AT1G44050                                                                                         |
| ENDOVIR1 | Chr1:29491625-29610696   | Chr1-29491626 | TRANS               | 7.81E-09 | NA        | 1.00E-07 | 0.054 | Centromere                                                                                        |
| ENDOVIR1 | Chr1:30145534-30424738   | Chr1-30145535 | TRANS               | 1.67E-10 | NA        | 4.98E-10 | 0.105 | Centromere                                                                                        |
| ENDOVIR1 | Chr3:12711190-12711192   | Chr3-12711191 | TRANS               | 3.39E-10 | NA        | 2.07E-07 | 0.087 | AT3G31350                                                                                         |
| ENDOVIR1 | Chr4:482154-489967       | Chr4-482155   | TRANS               | 4.60E-09 | NA        | 2.54E-06 | 0.092 | AT4G01090, AT4G01100, AT4G01110, AT4G01120, AT4G01130, AT4G01140, AT4G01150, AT4G01160, AT4G01170 |
| ENDOVIR1 | Chr5:17598754-17603687   | Chr5-17603169 | CIS                 | 4.02E-14 | 1.16E-10  | 7.69E-07 | 0.349 |                                                                                                   |
| ENDOVIR1 | Chr5:18585594-18591343   | Chr5-18585595 | TRANS               | 1.46E-08 | NA        | 1.94E-05 | 0.059 | AT5G45800, AT5G45810, AT5G45820, AT5G45830, AT5G45840, AT5G45850                                  |

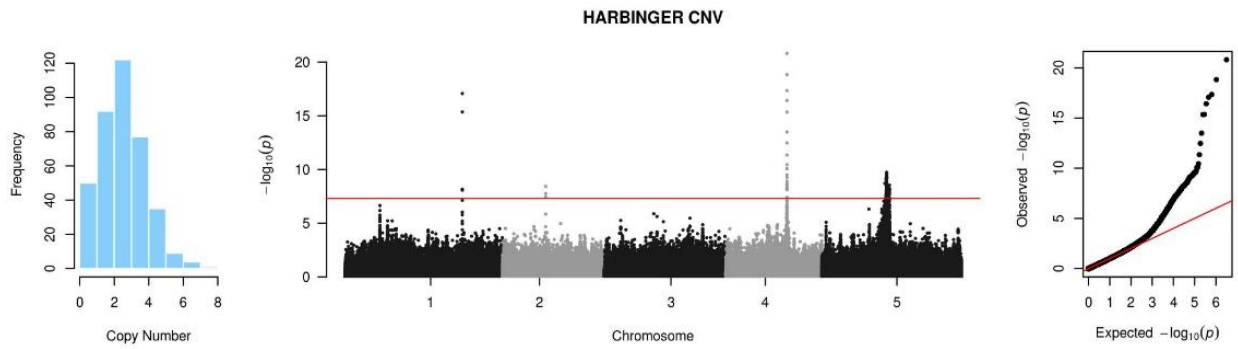

| TE        | GWAS associated interval | Leading SNP   | Type of association | P-value  |           |          | MAF   | Candidate gene(s) |
|-----------|--------------------------|---------------|---------------------|----------|-----------|----------|-------|-------------------|
|           |                          |               |                     | Joined   | Worldwide | Sweden   |       |                   |
| HARBINGER | Chr1:22695813-22698956   | Chr1-22698955 | C/S                 | 6.77E-09 | NA        | 3.33E-06 | 0.362 |                   |
| HARBINGER | Chr2:8379751-8381366     | Chr2-8381365  | C/S                 | 3.67E-09 | 4.17E-06  | 6.75E-04 | 0.482 |                   |
| HARBINGER | Chr4:11828799-11840680   | Chr4-11832740 | C/S                 | 1.54E-21 | 3.86E-09  | 7.78E-14 | 0.462 |                   |
| HARBINGER | Chr5:12192380-13075605   | Chr5-12443314 | C/S                 | 6.79E-10 | 2.25E-09  | 4.97E-04 | 0.274 |                   |

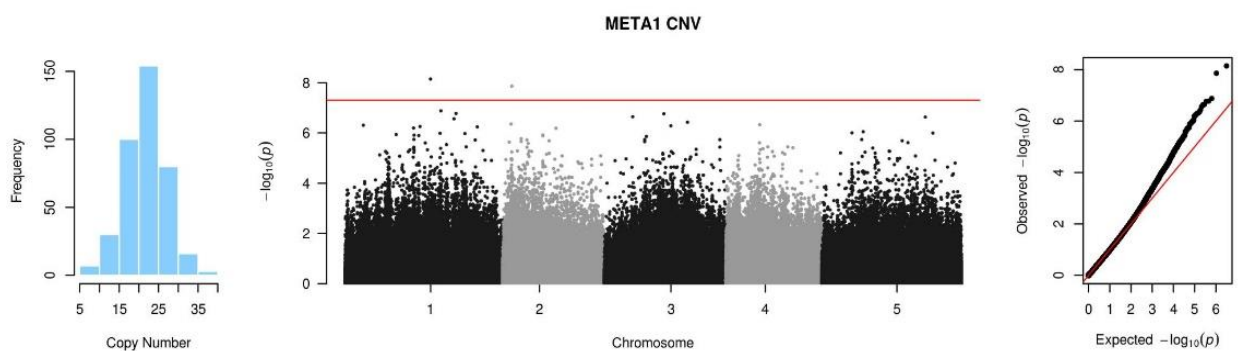

| TE    | GWAS associated interval | Leading SNP   | Type of association | P-value  |           |          | MAF   | Candidate gene(s) |
|-------|--------------------------|---------------|---------------------|----------|-----------|----------|-------|-------------------|
|       |                          |               |                     | Joined   | Worldwide | Sweden   |       |                   |
| META1 | Chr1:16538277-16538279   | Chr1-16538278 | TRANS               | 7.15E-09 | NA        | 5.94E-09 | 0.156 | AT1G43765         |
| META1 | Chr2:1825193-1825195     | Chr2-1825194  | C/S                 | 1.38E-08 | 4.24E-04  | 4.02E-07 | 0.238 |                   |

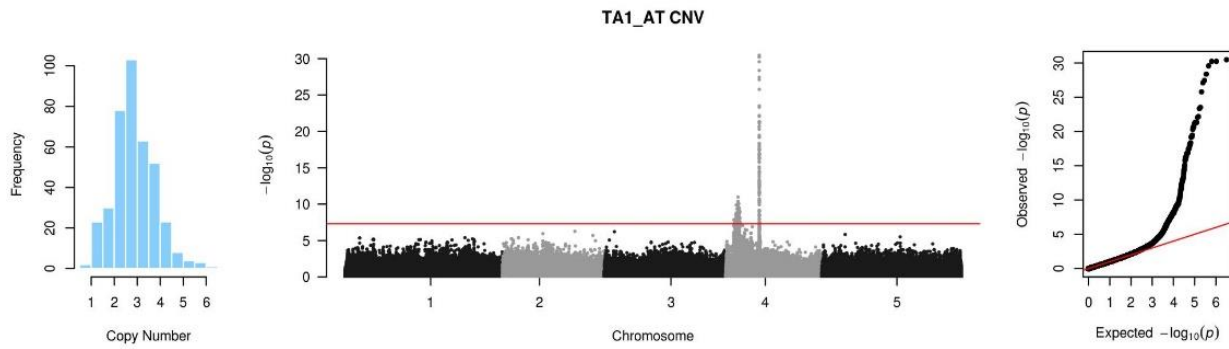

| TE     | GWAS associated interval | Leading SNP  | Type of association | P-value  |           |          | MAF   | Candidate gene(s) |
|--------|--------------------------|--------------|---------------------|----------|-----------|----------|-------|-------------------|
|        |                          |              |                     | Joined   | Worldwide | Sweden   |       |                   |
| TA1_AT | Chr4:1603072-2778767     | Chr4-2405296 | TRANS               | 3.97E-11 | 2.16E-09  | NA       | 0.105 | Centromere        |
| TA1_AT | Chr4:6501683-6522039     | Chr4-6502694 | CIS                 | 3.38E-31 | 1.46E-21  | 3.64E-13 | 0.315 |                   |

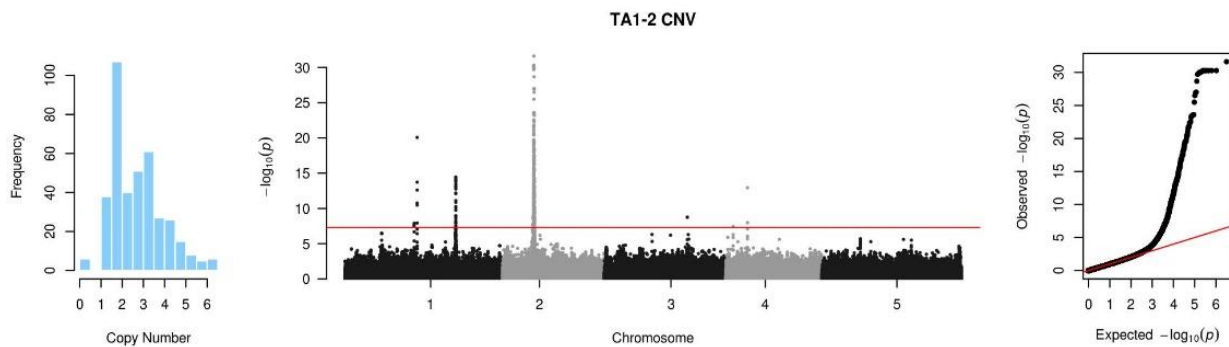

| TE    | GWAS associated interval | Leading SNP   | Type of association | P-value  |           |          | MAF   | Candidate gene(s)                                                                                                                                                                                    |
|-------|--------------------------|---------------|---------------------|----------|-----------|----------|-------|------------------------------------------------------------------------------------------------------------------------------------------------------------------------------------------------------|
|       |                          |               |                     | Joined   | Worldwide | Sweden   |       |                                                                                                                                                                                                      |
| TA1-2 | Chr1:13374338-13959108   | Chr1-13959107 | CIS                 | 1.17E-08 | 3.46E-01  | 1.22E-10 | 0.500 |                                                                                                                                                                                                      |
| TA1-2 | Chr1:21421680-21427870   | Chr1-21426003 | CIS                 | 1.78E-10 | 2.82E-03  | 3.51E-11 | 0.331 |                                                                                                                                                                                                      |
| TA1-2 | Chr2:6047365-6202913     | Chr2-6098822  | TRANS               | 2.41E-32 | 1.80E-15  | 1.08E-17 | 0.277 | AT2G14255, AT2G14260, AT2G14270, AT2G14282, AT2G14285, AT2G14288, AT2G14289, AT2G14290, AT2G14365, AT2G14378, AT2G14390, AT2G14440, AT2G14460, AT2G14500, AT2G14510, AT2G14520, AT2G14530, AT2G14540 |
| TA1-2 | Chr3:16053230-16053253   | Chr3-16053231 | TRANS               | 1.78E-09 | NA        | 4.23E-08 | 0.064 | AT3G44400                                                                                                                                                                                            |
| TA1-2 | Chr4:4231227-4231267     | Chr4-4231228  | TRANS               | 1.15E-13 | 8.77E-12  | 2.25E-04 | 0.144 | Centromere                                                                                                                                                                                           |

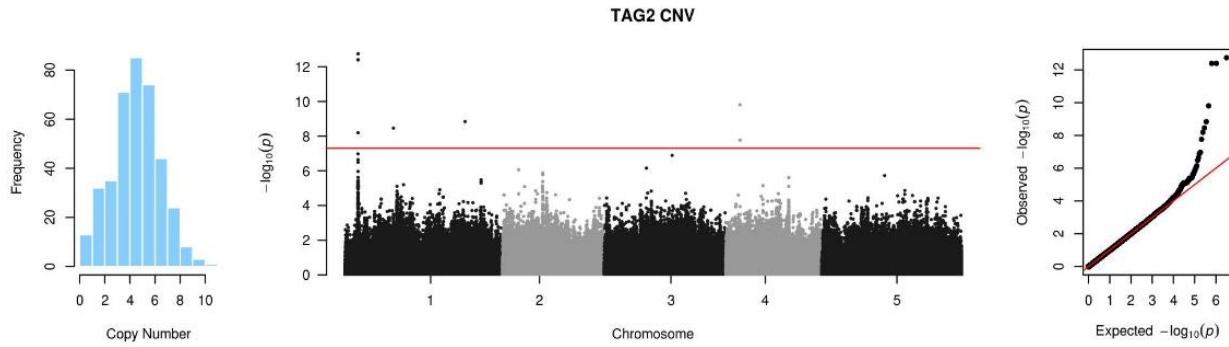

| TE   | GWAS associated interval | Leading SNP   | Type of association | P-value  |           |          | MAF   | Candidate gene(s)                                                                      |
|------|--------------------------|---------------|---------------------|----------|-----------|----------|-------|----------------------------------------------------------------------------------------|
|      |                          |               |                     | Joined   | Worldwide | Sweden   |       |                                                                                        |
| TAG2 | Chr1:2540827-2546070     | Chr1-2540828  | TRANS               | 1.81E-13 | 8.71E-11  | 7.25E-05 | 0.423 | AT1G08130                                                                              |
| TAG2 | Chr1:9386433-9386435     | Chr1-9386434  | TRANS               | 3.47E-09 | 6.03E-04  | 5.61E-06 | 0.162 | AT1G27000, AT1G27008, AT1G27020, AT1G27030, AT1G27040, AT1G27045, AT1G27050, AT1G27060 |
| TAG2 | Chr1:23242799-23242801   | Chr1-23242800 | CIS                 | 1.44E-09 | NA        | 2.67E-10 | 0.254 |                                                                                        |
| TAG2 | Chr4:2790842-2791555     | Chr4-2790843  | CIS                 | 1.56E-10 | 4.06E-07  | 3.63E-04 | 0.490 |                                                                                        |

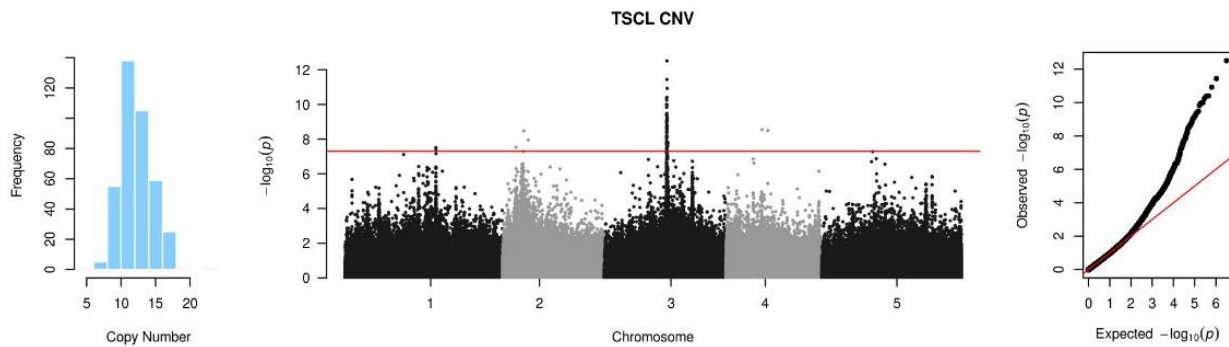

| TE   | GWAS associated interval | Leading SNP   | Type of association | P-value  |           |          | MAF   | Candidate gene(s)                                                                      |
|------|--------------------------|---------------|---------------------|----------|-----------|----------|-------|----------------------------------------------------------------------------------------|
|      |                          |               |                     | Joined   | Worldwide | Sweden   |       |                                                                                        |
| TSCL | Chr1:17576803-17576805   | Chr1-17576804 | TRANS               | 3.08E-08 | 1.54E-05  | 1.12E-03 | 0.438 | AT1G47740, AT1G47750, AT1G47760, AT1G47765, AT1G47740, AT1G47750, AT1G47760, AT1G47765 |
| TSCL | Chr2:2644617-2644619     | Chr2-2644618  | TRANS               | 2.99E-08 | 2.01E-07  | 1.33E-02 | 0.500 | AT2G06645                                                                              |
| TSCL | Chr2:4129746-4129748     | Chr2-4129747  | TRANS               | 3.37E-09 | 1.91E-07  | 1.95E-02 | 0.382 | AT2G10602                                                                              |
| TSCL | Chr2:4997864-4997866     | Chr2-4997865  | TRANS               | 1.13E-08 | 2.32E-09  | NA       | 0.241 | AT2G12400                                                                              |
| TSCL | Chr3:12042050-12343556   | Chr3-12117064 | CIS                 | 3.11E-13 | 1.58E-08  | 4.66E-07 | 0.387 |                                                                                        |
| TSCL | Chr4:7062242-7062244     | Chr4-7062243  | TRANS               | 2.85E-09 | 2.45E-09  | NA       | 0.223 | AT4G11670, AT4G11680, AT4G11690, AT4G11700, AT4G11720, AT4G11730, AT4G11740            |
| TSCL | Chr4:8148311-8148313     | Chr4-8148312  | TRANS               | 3.19E-09 | 1.21E-09  | NA       | 0.226 | AT4G14140 (MET2a)                                                                      |

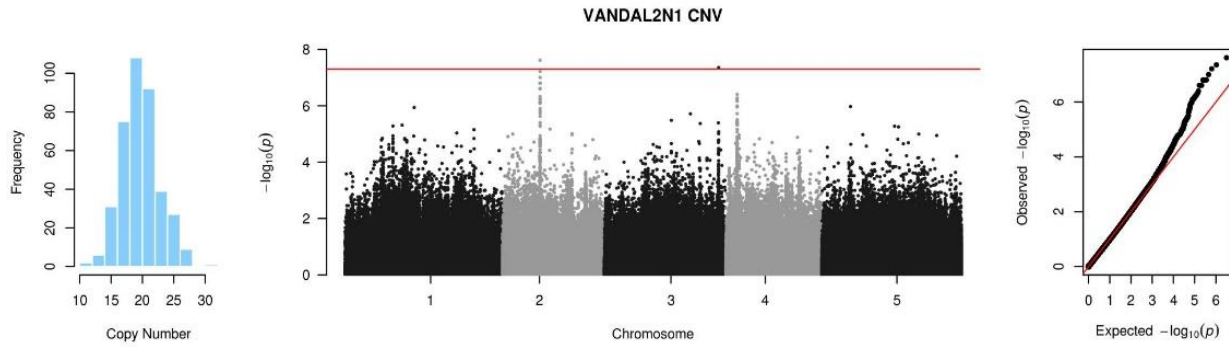

| TE        | GWAS associated interval | Leading SNP  | Type of association | P-value  |           |          | MAF   | Candidate gene(s) |
|-----------|--------------------------|--------------|---------------------|----------|-----------|----------|-------|-------------------|
|           |                          |              |                     | Joined   | Worldwide | Sweden   |       |                   |
| VANDAL2N1 | Chr2:7287475-7287477     | Chr2-7287476 | CIS                 | 2.42E-08 | 1.66E-06  | 2.72E-03 | 0.100 |                   |

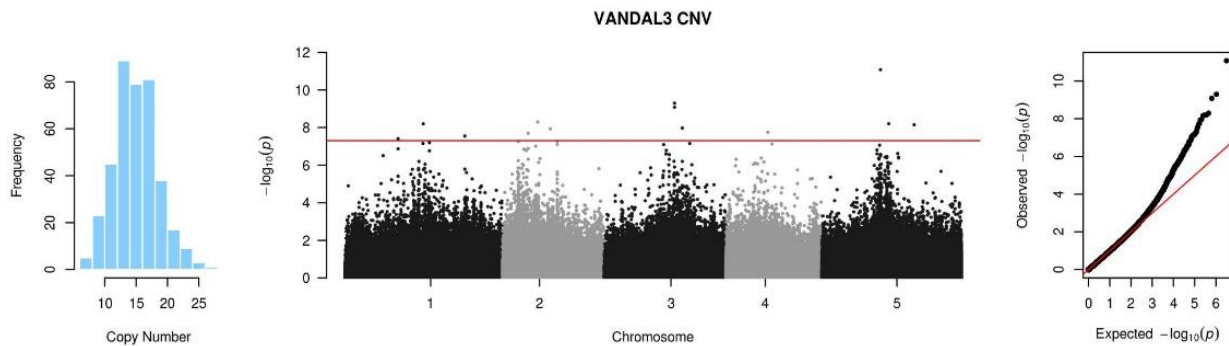

| TE      | GWAS associated interval | Leading SNP   | Type of association | P-value  |           |          | MAF   | Candidate gene(s)                                                                                            |
|---------|--------------------------|---------------|---------------------|----------|-----------|----------|-------|--------------------------------------------------------------------------------------------------------------|
|         |                          |               |                     | Joined   | Worldwide | Sweden   |       |                                                                                                              |
| VANDAL3 | Chr1:15141763-15141765   | Chr1-15141764 | TRANS               | 6.41E-09 | 1.42E-07  | NA       | 0.136 | AT1G62570, AT1G62580, AT1G62590, AT1G62600, AT1G62610, AT1G62620, AT1G62630                                  |
| VANDAL3 | Chr1:23179645-23179647   | Chr1-23179646 | TRANS               | 2.84E-08 | 5.69E-07  | 5.28E-02 | 0.328 | AT1G62570, AT1G62580, AT1G62590, AT1G62600, AT1G62610, AT1G62620, AT1G62630                                  |
| VANDAL3 | Chr2:4999449-4999451     | Chr2-4999450  | TRANS               | 2.02E-08 | 3.40E-08  | NA       | 0.131 | AT2G12400                                                                                                    |
| VANDAL3 | Chr2:6822456-6822458     | Chr2-6822457  | TRANS               | 5.07E-09 | 1.71E-08  | NA       | 0.328 | AT2G15620, AT2G15630, AT2G15640, AT2G15660, AT2G15670, AT2G15680, AT2G15690                                  |
| VANDAL3 | Chr2:9281325-9281327     | Chr2-9281326  | TRANS               | 1.16E-08 | 9.39E-08  | NA       | 0.182 | AT2G21710, AT2G21720, AT2G21725, AT2G21727, AT2G21730, AT2G21740, AT2G21750, AT2G21760, AT2G21770, AT2G21780 |
| VANDAL3 | Chr3:13582231-13582240   | Chr3-13582232 | TRANS               | 8.30E-10 | 7.51E-09  | NA       | 0.141 | Centromere                                                                                                   |
| VANDAL3 | Chr3:15074728-15074730   | Chr3-15074729 | TRANS               | 1.06E-08 | 9.15E-08  | NA       | 0.167 | AT3G43083                                                                                                    |
| VANDAL3 | Chr4:8148311-8148313     | Chr4-8148312  | TRANS               | 1.76E-08 | 1.90E-07  | NA       | 0.226 | <b>AT4G14140 (MET2a)</b>                                                                                     |
| VANDAL3 | Chr5:11344169-11344171   | Chr5-11344170 | TRANS               | 8.34E-12 | 3.65E-12  | 1.77E-01 | 0.408 | Centromere                                                                                                   |
| VANDAL3 | Chr5:12931127-12931129   | Chr5-12931128 | TRANS               | 6.34E-09 | 4.50E-07  | 1.65E-03 | 0.362 | Centromere                                                                                                   |
| VANDAL3 | Chr5:17851103-17851105   | Chr5-17851104 | TRANS               | 7.04E-09 | 2.03E-08  | 1.25E-01 | 0.192 | AT5G44290, AT5G44300, AT5G44306, AT5G44310, AT5G44316, AT5G44320, AT5G44330, AT5G44340                       |

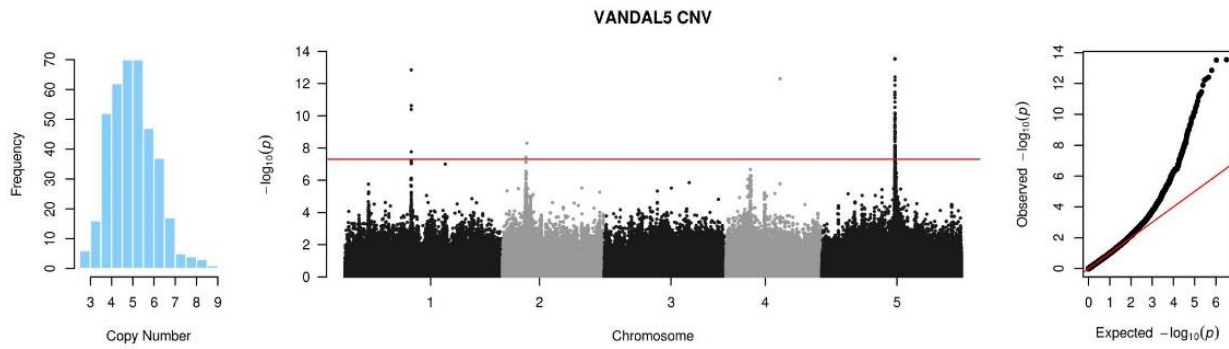

| TE      | GWAS associated interval | Leading SNP   | Type of association | P-value  |           |          | MAF   | Candidate gene(s)               |
|---------|--------------------------|---------------|---------------------|----------|-----------|----------|-------|---------------------------------|
|         |                          |               |                     | Joined   | Worldwide | Sweden   |       |                                 |
| VANDAL5 | Chr1:12818394-12828989   | Chr1-12818395 | CIS                 | 1.40E-13 | 2.62E-08  | 7.05E-07 | 0.431 |                                 |
| VANDAL5 | Chr2:4737737-4737739     | Chr2-4737738  | TRANS               | 5.02E-09 | 3.31E-07  | 4.82E-03 | 0.118 | AT2G11778, AT2G11810            |
| VANDAL5 | Chr4:10536648-10536650   | Chr4-10536649 | CIS                 | 4.94E-13 | 2.47E-10  | 1.50E-04 | 0.287 |                                 |
| VANDAL5 | Chr5:14113255-14113257   | Chr5-14113256 | TRANS               | 7.55E-09 | 3.58E-04  | 9.64E-08 | 0.462 | AT5G35950, AT5G35960, AT5G35970 |

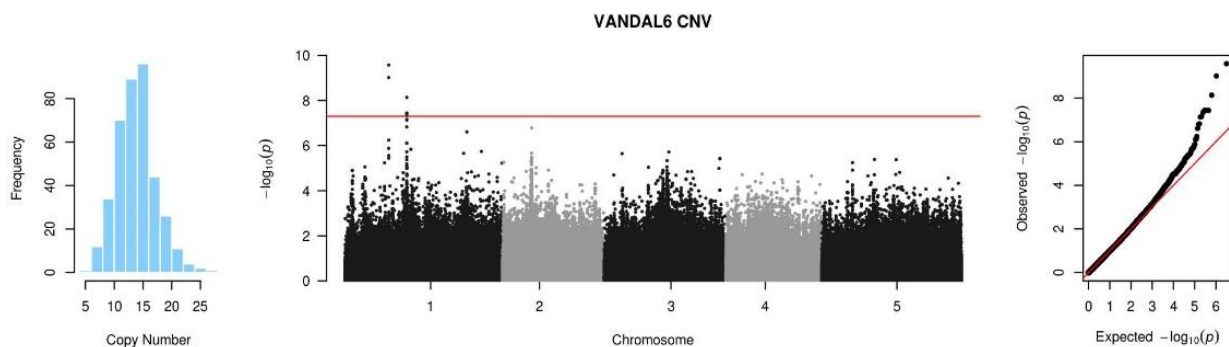

| TE      | GWAS associated interval | Leading SNP   | Type of association | P-value  |           |          | MAF   | Candidate gene(s)                                                                                            |
|---------|--------------------------|---------------|---------------------|----------|-----------|----------|-------|--------------------------------------------------------------------------------------------------------------|
|         |                          |               |                     | Joined   | Worldwide | Sweden   |       |                                                                                                              |
| VANDAL6 | Chr1:8461393-8461722     | Chr1-8461394  | CIS                 | 9.70E-10 | 4.17E-05  | 1.46E-06 | 0.418 |                                                                                                              |
| VANDAL6 | Chr1:11960663-11960665   | Chr1-11960664 | TRANS               | 7.33E-09 | 1.11E-03  | 2.52E-06 | 0.282 | AT1G32970, AT1G32975, AT1G32980, AT1G32990, AT1G32992, AT1G33010, AT1G33020, AT1G33030, AT1G33040, AT1G33050 |

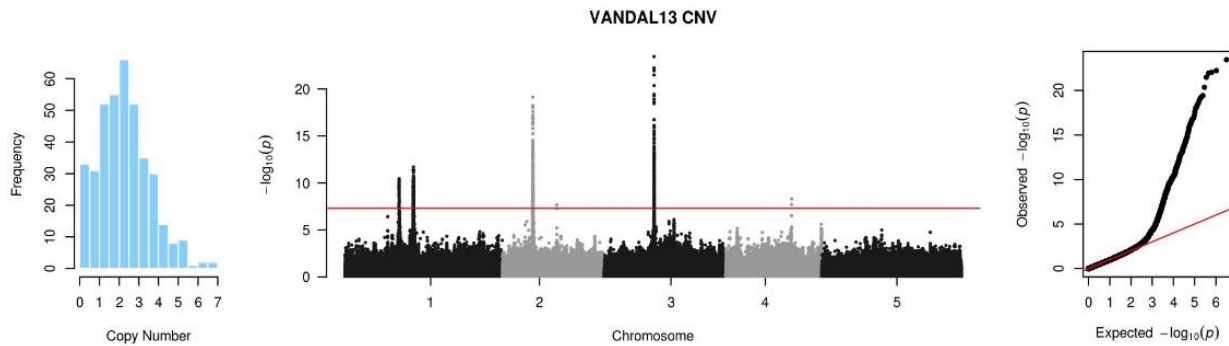

| TE       | GWAS associated interval | Leading SNP   | Type of association | P-value  |           |          | MAF   | Candidate gene(s)                                                                                                                  |
|----------|--------------------------|---------------|---------------------|----------|-----------|----------|-------|------------------------------------------------------------------------------------------------------------------------------------|
|          |                          |               |                     | Joined   | Worldwide | Sweden   |       |                                                                                                                                    |
| VANDAL13 | Chr1:10425512-10511828   | Chr1-10452544 | CIS                 | 1.00E-10 | 2.01E-03  | 1.72E-09 | 0.321 |                                                                                                                                    |
| VANDAL13 | Chr1:13229289-13278414   | Chr1-13229290 | CIS                 | 4.71E-12 | 1.68E-07  | 2.65E-07 | 0.195 |                                                                                                                                    |
| VANDAL13 | Chr2:5875322-5908135     | Chr2-5903083  | CIS                 | 7.50E-20 | 9.12E-11  | 1.13E-10 | 0.464 |                                                                                                                                    |
| VANDAL13 | Chr2:10530058-10530060   | Chr2-10530059 | TRANS               | 2.09E-08 | 4.82E-05  | 9.67E-05 | 0.474 | AT2G24740                                                                                                                          |
| VANDAL13 | Chr3:9591516-9634713     | Chr3-9615484  | CIS                 | 3.54E-24 | 2.39E-13  | 5.30E-12 | 0.472 |                                                                                                                                    |
| VANDAL13 | Chr4:12727871-12749741   | Chr4-12749740 | TRANS               | 4.86E-09 | NA        | 3.50E-06 | 0.067 | AT4G24640, AT4G24644, AT4G24650, AT4G24660, AT4G24670, AT4G24680, AT4G24690, AT4G24700, AT4G24710, AT4G24730, AT4G24740, AT4G24750 |

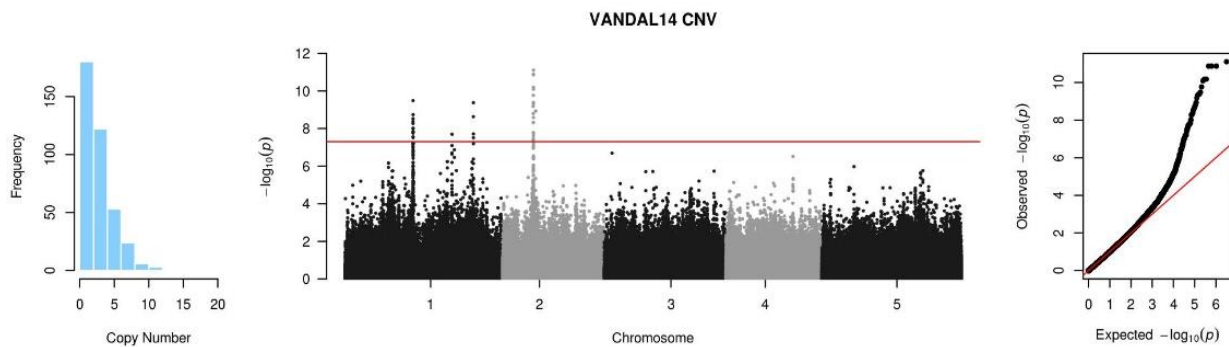

| TE       | GWAS associated interval | Leading SNP   | Type of association | P-value  |           |          | MAF   | Candidate gene(s)                                     |
|----------|--------------------------|---------------|---------------------|----------|-----------|----------|-------|-------------------------------------------------------|
|          |                          |               |                     | Joined   | Worldwide | Sweden   |       |                                                       |
| VANDAL14 | Chr1:20700191-20700193   | Chr1-20700192 | TRANS               | 2.00E-08 | 7.44E-02  | 3.32E-08 | 0.074 | AT1G55420, AT1G55430, AT1G55440, AT1G55450, AT1G55460 |
| VANDAL14 | Chr1:24822615-24824216   | Chr1-24823448 | TRANS               | 4.22E-10 | NA        | 5.65E-07 | 0.141 | AT1G66550                                             |
| VANDAL14 | Chr2:5953772-6016808     | Chr2-6014486  | CIS                 | 7.81E-12 | 3.61E-08  | 6.49E-06 | 0.249 |                                                       |
| VANDAL14 | Chr2:6449392-6449394     | Chr2-6449393  | TRANS               | 1.16E-09 | 1.14E-06  | 7.63E-05 | 0.085 | AT2G14960                                             |

### VANDAL16 CNV

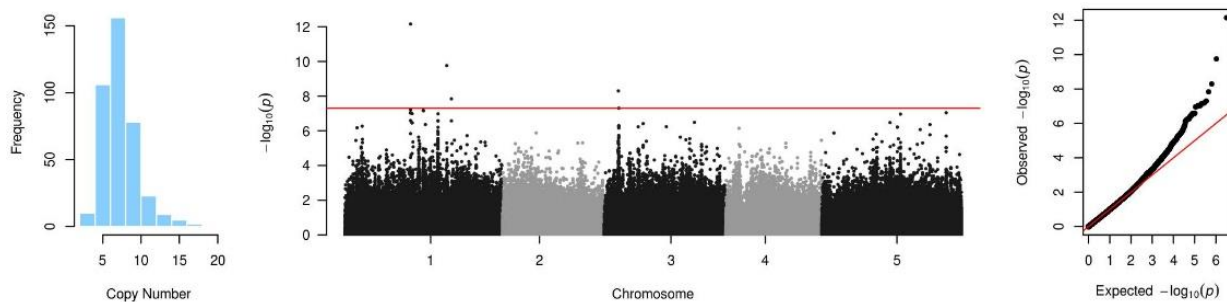

| TE       | GWAS associated interval | Leading SNP   | Type of association | P-value  |           |          | MAF   | Candidate gene(s)                                                                                            |
|----------|--------------------------|---------------|---------------------|----------|-----------|----------|-------|--------------------------------------------------------------------------------------------------------------|
|          |                          |               |                     | Joined   | Worldwide | Sweden   |       |                                                                                                              |
| VANDAL16 | Chr1:12678935-12678937   | Chr1-12678936 | CIS                 | 7.03E-13 | 4.66E-08  | 9.88E-06 | 0.438 |                                                                                                              |
| VANDAL16 | Chr1:19668640-19668642   | Chr1-19668641 | TRANS               | 1.75E-10 | NA        | 1.35E-06 | 0.051 | AT1G52780, AT1G52790, AT1G52800, AT1G52810, AT1G52820, AT1G52825, AT1G52827, AT1G52830                       |
| VANDAL16 | Chr1:20580746-20580748   | Chr1-20580747 | TRANS               | 1.44E-08 | 6.56E-09  | 2.11E-01 | 0.090 | AT1G55130, AT1G55140, AT1G55150, AT1G55152, AT1G55160, AT1G55170, AT1G55175, AT1G55180, AT1G55190, AT1G55200 |
| VANDAL16 | Chr3:2718661-2718663     | Chr3-2718662  | TRANS               | 5.01E-09 | 1.72E-03  | 1.76E-06 | 0.336 | AT3G08890, AT3G08900, AT3G08910, AT3G08920, AT3G08930, AT3G08940, AT3G08943, AT3G08947, AT3G08950            |

### VANDAL17 CNV

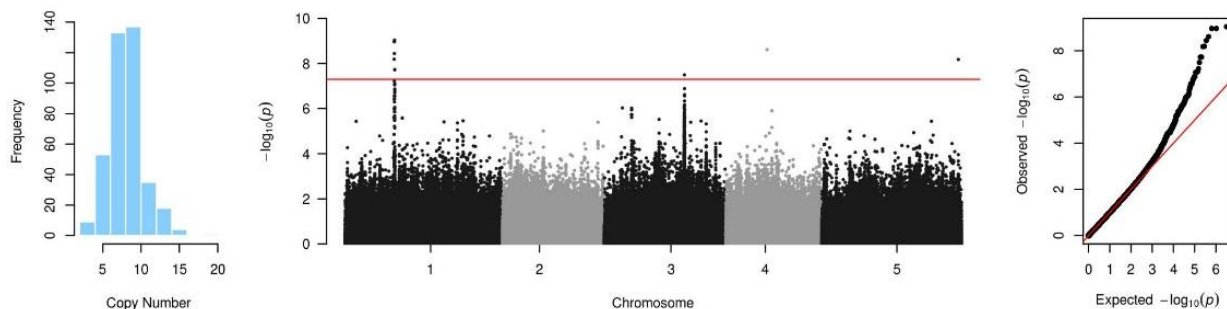

| TE       | GWAS associated interval | Leading SNP   | Type of association | P-value  |           |          | MAF   | Candidate gene(s)                                                           |
|----------|--------------------------|---------------|---------------------|----------|-----------|----------|-------|-----------------------------------------------------------------------------|
|          |                          |               |                     | Joined   | Worldwide | Sweden   |       |                                                                             |
| VANDAL17 | Chr1:9512264-9629285     | Chr1-9574348  | TRANS               | 9.11E-10 | 2.04E-05  | 6.71E-06 | 0.097 |                                                                             |
| VANDAL17 | Chr4:8006212-8006214     | Chr4-8006213  | TRANS               | 2.45E-09 | 1.21E-08  | 1.51E-02 | 0.072 | AT4G13780, AT4G13790, AT4G13800, AT4G13810, AT4G13820, AT4G13830, AT4G13840 |
| VANDAL17 | Chr5:26385626-26385628   | Chr5-26385627 | TRANS               | 6.63E-09 | 1.85E-14  | 5.83E-01 | 0.056 | AT5G65930, AT5G65940, AT5G65950, AT5G65960, AT5G65970, AT5G65980, AT5G65990 |

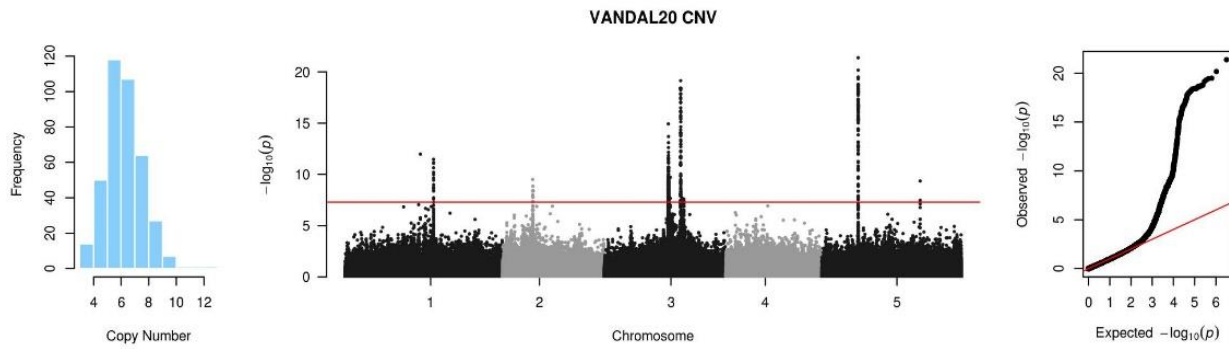

| TE       | GWAS associated interval | Leading SNP   | Type of association | P-value  |           |          | MAF   | Candidate gene(s)                                                                                            |
|----------|--------------------------|---------------|---------------------|----------|-----------|----------|-------|--------------------------------------------------------------------------------------------------------------|
|          |                          |               |                     | Joined   | Worldwide | Sweden   |       |                                                                                                              |
| VANDAL20 | Chr1:14600154-14600156   | Chr1-14600155 | TRANS               | 1.06E-12 | NA        | 1.77E-07 | 0.100 |                                                                                                              |
| VANDAL20 | Chr1:17133749-17146953   | Chr1-17135470 | TRANS               | 6.90E-12 | 7.17E-06  | 3.40E-08 | 0.351 | AT1G45201, AT1G45207, AT1G45215, AT1G45221, AT1G45223, AT1G45229, AT1G45231, AT1G45233, AT1G45234, AT1G45243 |
| VANDAL20 | Chr2:5860912-5905408     | Chr2-5860913  | TRANS               | 3.13E-10 | 2.88E-10  | 4.28E-02 | 0.064 | AT2G13950, AT2G13960, AT2G13980, AT2G14000, AT2G14045, AT2G14050, AT2G14060                                  |
| VANDAL20 | Chr3:12377529-12448562   | Chr3-12395623 | TRANS               | 1.17E-15 | 2.18E-08  | 4.39E-11 | 0.185 | AT3G30768, AT3G30769, AT3G30770, AT3G30775                                                                   |
| VANDAL20 | Chr3:12536059-12536061   | Chr3-12536060 | TRANS               | 2.98E-08 | 2.24E-07  | 2.94E-01 | 0.218 | AT3G30820                                                                                                    |
| VANDAL20 | Chr3:12747790-12767654   | Chr3-12767653 | TRANS               | 1.92E-10 | NA        | 8.08E-05 | 0.069 | AT3G31400, AT3G31401, AT3G31402                                                                              |
| VANDAL20 | Chr3:14761600-14806561   | Chr3-14763896 | CIS                 | 7.16E-20 | 1.54E-10  | 7.17E-11 | 0.305 |                                                                                                              |
| VANDAL20 | Chr3:15070929-15070931   | Chr3-15070930 | TRANS               | 2.06E-08 | NA        | 2.87E-06 | 0.059 | AT3G43083                                                                                                    |
| VANDAL20 | Chr3:15371779-15371781   | Chr3-15371780 | TRANS               | 2.55E-08 | 7.30E-04  | 2.19E-06 | 0.174 | AT3G43440                                                                                                    |
| VANDAL20 | Chr5:7027445-7038846     | Chr5-7034340  | CIS                 | 4.15E-22 | 1.98E-10  | 1.57E-15 | 0.479 |                                                                                                              |
| VANDAL20 | Chr5:19019479-19019481   | Chr5-19019480 | TRANS               | 4.43E-10 | 5.91E-08  | 1.03E-03 | 0.333 | AT5G46850, AT5G46860, AT5G46870, AT5G46871, AT5G46873, AT5G46874, AT5G46877                                  |

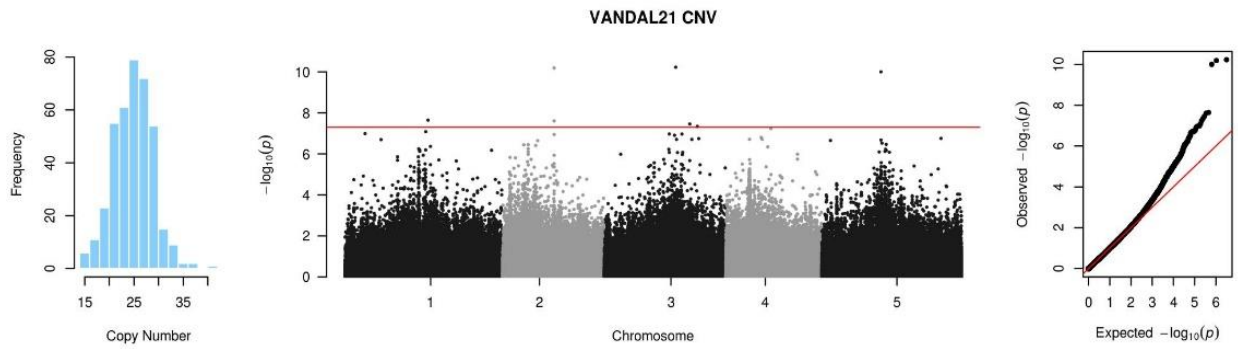

| TE       | GWAS associated interval | Leading SNP   | Type of association | P-value  |           |          | MAF   | Candidate gene(s)    |
|----------|--------------------------|---------------|---------------------|----------|-----------|----------|-------|----------------------|
|          |                          |               |                     | Joined   | Worldwide | Sweden   |       |                      |
| VANDAL21 | Chr1:16073091-16073093   | Chr1-16073092 | TRANS               | 2.27E-08 | 2.89E-08  | NA       | 0.228 | AT1G42700, AT1G42710 |
| VANDAL21 | Chr2:10001804-10002742   | Chr2-10001805 | CIS                 | 6.48E-11 | 2.33E-06  | 8.92E-06 | 0.254 |                      |
| VANDAL21 | Chr3:13826287-13826289   | Chr3-13826288 | TRANS               | 5.90E-11 | 9.74E-10  | 9.59E-03 | 0.228 |                      |
| VANDAL21 | Chr5:11418711-11418713   | Chr5-11418712 | TRANS               | 9.97E-11 | 4.38E-09  | 2.08E-03 | 0.349 |                      |
