# Supplementary material for: The Arabidopsis thaliana mobilome and its impact at the species level
Source: eLife journal article supplement (doi:10.7554/elife.15716), 2016-06-03
Supplement: supp [file elife-15716-supp-v1.zip › elife_poa_e15716_Supplementary_File_3.xlsx]

## Sheet: Hoja1
Supplementray file 3. PCR validation of non-reference TE insertions with TSDs and list of primer sequences used in this study.
Insertion coordinates	TE family	Nearby gene	Validated presence absence by PCR?	Validation 5' primer sequence	Validation 3' primer sequence	qPCR 5' primer sequence	qPCR 3' primer sequence
Chr4:12133674-12133690	ATCOPIA52	AT4G23160	YES	GCATCATGAAAACGGTTGATATT	GCTTCGGAGTGTTAGTTCTTGAG	TGGCAGCTTGGTTCATATTAGAT	CTCAAAACCCTTTTGTCCTCTTT
Chr2:12719137-12719156	ATCOPIA78	AT2G29780	YES	GAAACCCGAAGAACTCCACA	GGAATCCGATCAAAGCGTAA	TGTCTTCAAGGTTCTCCGATAAA	GCCATCTCTATGCACCAAGTATC
Chr3:1350918-1350934	ATCOPIA78	AT3G04903	YES	CAATCCTTTAAGCTTGGGATAGA	ATATTCGGTGCCGATGAAAC	CAATCCTTTAAGCTTGGGATAGA	ATATTCGGTGCCGATGAAAC
Chr3:4518013-4518032	ATCOPIA78	AT3G13760	YES	CCACAAGCATCACATGGAAC	ATCCCCTACTCCAGCCCTTA	CTGTGCACGAATGAAAACATTTA	CTTACATTATGCCACGGAGAAAG
Chr3:7363086-7363100	ATCOPIA78	AT3G20997	YES	ATAGCAAGAATGGTGGCTTTGTA	TGCGTTGTTATTTATTTCCGTTT	AAAGCACGAGCCACCACTTC	AGGACAAGAAACGTGCCATGA
Chr3:17002735-17002758	ATCOPIA78	AT3G46270	YES	TACGTCTCCGTCCGATAACC	ATCTCTGGCGGCTTGTTAGA	ATTGTTATGTCCAAGGCATTGTC	GAAGTGGCCTCTACATCTCTCAA
Chr4:13338591-13338607	ATCOPIA78	AT4G26380	YES	GTGATCTTCGGCTCCTGCTT	TCCTTTCTGAGGTGGCCAGT	GTGATCTTCGGCTCCTGCTT	TCCTTTCTGAGGTGGCCAGT
Chr4:15328830-15328845	ATCOPIA8B	AT4G31640	YES	CAGGTTCTGTTTTCACATTCTCC	CAAGCATATAGAGGGAAAACACG	TTGTCCAACCTCCAGCTATAAAA	AGGCATGAGATAGTTTTGATGGA
Chr1:18009379-18009393	ATCOPIA93	AT1G48690	YES	CCAGTGGTGAGCTACGATGA	GATGGCCGGTTCTTGAAATA	GTGGACGAGCATAAAGCGTG	TGCGAATGGAGAGCCTTCAA
Chr3:3056657-3056677	ATCOPIA93	AT3G09940	YES	CGAAATCTCCAAAGCCAAAG	GTTGTGCTCGTGCCACTTTA	AATCGAGGATAGTGATGAGCTTG	TGCTACAGTTCCCTTGATGATTT
Chr2:14826176-14826194	ATHATN6	AT2G35160	NA	NA	NA	AACACCAGGCACAGTTCCAA	ATGGTGGGCTTCCTAGTTGC
Chr3:22078947-22078958	SIMPLEHAT2	AT3G59770	NA	NA	NA	AGCACCCTGTCCAGAAAACAT	CACGGTGCGGATGATTTGAC
Chr1:18106779-18106795	SIMPLEHAT2	AT1G48950	NA	NA	NA	CACAGAGCTTGCAGTCCAGT	GAGTGAGACGGCTAGGGGTA
Chr1:22668488-22668509	VANDAL17	AT1G61430	YES	TACAGTCAATATTGGTGTGCCAG	TATATTGGCCATTCGTATTTTGG	TTCTTGCGCTGAGAACCAGT	AGCTGGCGACAAGAACATGG
Chr1:18880127-18880149	VANDAL17	AT1G50940	NA	NA	NA	TCACAACACGTGCACTTCCA	GGTGCGGGTCCTTGTATGTT
Chr4:5813503-5813515	VANDAL1N1	AT4G09110	NA	NA	NA	ATCGTCTCTGCCAACTGTGG	AGCGGTTTCTCTCATGGACG
Chr4:6273274-6273290	VANDAL21	AT4G10030	NA	NA	NA	TGCACATCCTCCGCTAGAAC	ATTGCGAATTCGTCGTTTCCC
Chr5:7340013-7340038	VANDAL6	AT5G22130	YES	GATTGAACTAGCCGGTGTATGTC	TCAGTGTGTGTTGATTTTGCTTT	CCCCAGTTTACAGTACAGTTTGC	ACCGTCTGAAGAGAGGAGAGAAT
Chr5:18070784-18070799	VANDAL6	AT5G44785	NA	NA	NA	CAAGAACATTGACAAGAGCAGTG	TTAGCGGTGGTTTCACAGATACT
