# Supplementary material for: The Arabidopsis thaliana mobilome and its impact at the species level
Source: eLife journal article supplement (doi:10.7554/elife.15716), 2016-06-03
Supplement: supp [file elife-15716-supp-v1.zip › elife_poa_e15716_Supplementary_File_4.xlsx]

## Sheet: A
ELEMENT	FAMILY	SUPERFAMILY
AT5TE37855	ATTIR16T3A	DNA
AT4TE28405	ATTIR16T3A	DNA
AT4TE67005	TNAT1A	DNA
AT1TE16325	TNAT1A	DNA
AT2TE22040	ATENSPM1	DNA/En-Spm
AT2TE63800	ATENSPM1	DNA/En-Spm
AT4TE05190	ATENSPM1	DNA/En-Spm
AT3TE47975	ATENSPM11	DNA/En-Spm
AT1TE38940	ATENSPM1A	DNA/En-Spm
AT4TE07415	ATENSPM1A	DNA/En-Spm
AT1TE41230	ATENSPM1A	DNA/En-Spm
AT1TE42210	ATENSPM3	DNA/En-Spm
AT2TE20205	ATENSPM3	DNA/En-Spm
AT4TE18505/AT4TE18510	ATENSPM3	DNA/En-Spm
AT3TE62120/AT3TE62130	ATENSPM3	DNA/En-Spm
AT1TE36570	ATENSPM3	DNA/En-Spm
AT2TE18415	ATENSPM3	DNA/En-Spm
AT3TE57715/AT3TE57720	ATENSPM3	DNA/En-Spm
AT1TE62470	ATENSPM5	DNA/En-Spm
AT4TE09085	ATENSPM5	DNA/En-Spm
AT1TE55320	ATENSPM6	DNA/En-Spm
AT1TE06650	ATIS112A	DNA/Harbinger
AT5TE46220	ATIS112A	DNA/Harbinger
AT4TE54750	HARBINGER	DNA/Harbinger
AT5TE44415	HARBINGER	DNA/Harbinger
AT4TE30830	SIMPLEGUY1	DNA/Harbinger
AT5TE72870	SIMPLEGUY1	DNA/Harbinger
AT1TE52925	ATHAT3	DNA/HAT
AT3TE43415	ATHATN1	DNA/HAT
AT3TE63265	ATHATN1	DNA/HAT
AT5TE37200	ATHATN10	DNA/HAT
AT2TE07880	ATHATN3	DNA/HAT
AT2TE01350	ATHATN4	DNA/HAT
AT5TE28560	ATHATN6	DNA/HAT
AT1TE06470	ATHATN7	DNA/HAT
AT1TE42930	SIMPLEHAT1	DNA/HAT
AT4TE22040	SIMPLEHAT1	DNA/HAT
AT5TE49990	SIMPLEHAT1	DNA/HAT
AT2TE41090	SIMPLEHAT2	DNA/HAT
AT1TE08240	TAG2	DNA/HAT
AT5TE56560	TAG2	DNA/HAT
AT1TE36605	TAG2	DNA/HAT
AT3TE46170	TAG2	DNA/HAT
AT3TE10950	TAG3N1	DNA/HAT
AT5TE49330	TAG3N1	DNA/HAT
AT2TE30180	ATDNATA1	DNA/Mariner
AT2TE02465	ARNOLD1	DNA/MuDR
AT2TE08110	ARNOLD2	DNA/MuDR
AT2TE24335	ARNOLD2	DNA/MuDR
AT1TE38530	ARNOLD2	DNA/MuDR
AT2TE26255	ARNOLDY1	DNA/MuDR
AT3TE47185	ARNOLDY2	DNA/MuDR
AT2TE24935	AT9MU1	DNA/MuDR
AT1TE00840	AT9NMU1	DNA/MuDR
AT2TE22480	AT9NMU1	DNA/MuDR
AT2TE72380	AT9NMU1	DNA/MuDR
AT4TE25785	AT9NMU1	DNA/MuDR
AT5TE94375	AT9NMU1	DNA/MuDR
AT4TE50260	AT9TSD1	DNA/MuDR
AT3TE74275	AT9TSD1	DNA/MuDR
AT1TE53825	ATDNA1T9A	DNA/MuDR
AT3TE59770	ATDNA1T9A	DNA/MuDR
AT3TE24910	ATDNAI27T9A	DNA/MuDR
AT5TE61705	ATDNAI27T9A	DNA/MuDR
AT5TE85500	ATDNAI27T9A	DNA/MuDR
AT5TE64080	ATDNAI27T9B	DNA/MuDR
AT5TE81030	ATDNAI27T9B	DNA/MuDR
AT5TE33455	ATMU1	DNA/MuDR
AT1TE54925	ATMU10	DNA/MuDR
AT2TE23870	ATMU10	DNA/MuDR
AT1TE43880	ATMU11	DNA/MuDR
AT1TE96100	ATMU11	DNA/MuDR
AT1TE82600	ATMU2	DNA/MuDR
AT1TE19130	ATMU3	DNA/MuDR
AT5TE61255	ATMU3N1	DNA/MuDR
AT1TE14085	ATMU4	DNA/MuDR
AT3TE49090	ATMU5	DNA/MuDR
AT1TE93320	ATMU6	DNA/MuDR
AT1TE22695	ATMU6N1	DNA/MuDR
AT1TE74430	ATMU6N1	DNA/MuDR
AT5TE50750	ATMU6N1	DNA/MuDR
AT1TE59235	ATMU7	DNA/MuDR
AT2TE69630	ATMU7	DNA/MuDR
AT3TE40820	BOMZH1	DNA/MuDR
AT2TE29120	BOMZH1	DNA/MuDR
AT1TE41995	BRODYAGA1	DNA/MuDR
AT5TE58190	BRODYAGA1	DNA/MuDR
AT4TE23545	BRODYAGA1A	DNA/MuDR
AT4TE73405	BRODYAGA1A	DNA/MuDR
AT1TE54795	BRODYAGA2	DNA/MuDR
AT1TE58650	BRODYAGA2	DNA/MuDR
AT4TE76155	BRODYAGA2	DNA/MuDR
AT4TE89905	BRODYAGA2	DNA/MuDR
AT4TE67455	BRODYAGA2	DNA/MuDR
AT3TE33980	LIMPET1	DNA/MuDR
AT2TE11815	VANDAL1	DNA/MuDR
AT2TE09205	VANDAL1	DNA/MuDR
AT5TE37350	VANDAL1	DNA/MuDR
AT5TE38070	VANDAL1	DNA/MuDR
AT3TE40145	VANDAL13	DNA/MuDR
AT1TE23740	VANDAL14	DNA/MuDR
AT3TE11850	VANDAL16	DNA/MuDR
AT3TE22200	VANDAL17	DNA/MuDR
AT3TE60740	VANDAL17	DNA/MuDR
AT1TE23420	VANDAL1N1	DNA/MuDR
AT1TE31190	VANDAL2	DNA/MuDR
AT1TE64080	VANDAL2	DNA/MuDR
AT2TE09375	VANDAL2	DNA/MuDR
AT2TE25840	VANDAL2	DNA/MuDR
AT3TE54510	VANDAL2	DNA/MuDR
AT3TE62260	VANDAL2	DNA/MuDR
AT4TE12615	VANDAL2	DNA/MuDR
AT4TE23825	VANDAL2	DNA/MuDR
AT5TE52200	VANDAL2	DNA/MuDR
AT2TE06955	VANDAL21	DNA/MuDR
AT2TE42810	VANDAL21	DNA/MuDR
AT3TE53580	VANDAL21	DNA/MuDR
AT4TE23345	VANDAL21	DNA/MuDR
AT4TE15615	VANDAL21	DNA/MuDR
AT5TE03885	VANDAL2N1	DNA/MuDR
AT5TE57960	VANDAL2N1	DNA/MuDR
AT5TE64455	VANDAL2N1	DNA/MuDR
AT1TE35680	VANDAL2N1	DNA/MuDR
AT2TE45465	VANDAL3	DNA/MuDR
AT1TE56135	VANDAL4	DNA/MuDR
AT1TE27295	VANDAL6	DNA/MuDR
AT2TE43165	VANDAL6	DNA/MuDR
AT3TE70635	VANDAL6	DNA/MuDR
AT4TE25050	VANDAL6	DNA/MuDR
AT4TE67560	VANDAL6	DNA/MuDR
AT5TE53465	VANDAL6	DNA/MuDR
AT4TE45190	VANDAL8	DNA/MuDR
AT5TE34730	VANDAL8	DNA/MuDR
AT4TE23185/AT4TE23190/AT4TE23195/AT4TE23200	ATMU13	DNA/MuDR
AT2TE11860	ATHPOGO	DNA/Pogo
AT2TE31715	ATHPOGON3	DNA/Pogo
AT1TE70805	ATLINE1_1	LINE/L1
AT4TE31790	ATLINE1_1	LINE/L1
AT5TE65710	ATLINE1_1	LINE/L1
AT5TE52410	ATLINE1_1	LINE/L1
AT5TE52345	ATLINE1_2	LINE/L1
AT5TE52400	ATLINE1_2	LINE/L1
AT2TE27670	ATLINE1_4	LINE/L1
AT5TE31020	ATLINE1_6	LINE/L1
AT3TE43615	ATLINE2	LINE/L1
AT1TE38580	ATLINEIII	LINE/L1
AT2TE01000	ATLINEIII	LINE/L1
AT3TE62085	ATLINEIII	LINE/L1
AT1TE57585	ATLINEIII	LINE/L1
AT1TE33490	TA11	LINE/L1
AT5TE72200	TSCL	LINE/L1
AT4TE44080	ATCOPIA1	LTR/COPIA
AT5TE50775	ATCOPIA10	LTR/COPIA
AT1TE86360	ATCOPIA11	LTR/COPIA
AT4TE56270	ATCOPIA11	LTR/COPIA
AT5TE49725	ATCOPIA12	LTR/COPIA
AT2TE23850/AT2TE23855	ATCOPIA12/ATCOPIA13	LTR/COPIA
AT2TE45020/AT2TE45025	ATCOPIA12/ATCOPIA13	LTR/COPIA
AT5TE81385	ATCOPIA13	LTR/COPIA
AT3TE46255	ATCOPIA14	LTR/COPIA
AT1TE30195	ATCOPIA16	LTR/COPIA
AT4TE36845	ATCOPIA17	LTR/COPIA
AT4TE06710	ATCOPIA2	LTR/COPIA
AT2TE13385	ATCOPIA20	LTR/COPIA
AT5TE65370	ATCOPIA21	LTR/COPIA
AT1TE70490	ATCOPIA22	LTR/COPIA
AT5TE79225	ATCOPIA22	LTR/COPIA
AT4TE29830	ATCOPIA22	LTR/COPIA
AT3TE90530	ATCOPIA23	LTR/COPIA
AT3TE94195	ATCOPIA23	LTR/COPIA
AT5TE65640	ATCOPIA23	LTR/COPIA
AT5TE56585	ATCOPIA25	LTR/COPIA
AT1TE36030/AT1TE36035	ATCOPIA25/ATCOPIA51	LTR/COPIA
AT4TE24480	ATCOPIA26	LTR/COPIA
AT3TE47235	ATCOPIA27	LTR/COPIA
AT5TE00230	ATCOPIA27	LTR/COPIA
AT2TE06390	ATCOPIA28	LTR/COPIA
AT1TE30550	ATCOPIA3	LTR/COPIA
AT1TE38210	ATCOPIA31	LTR/COPIA
AT3TE44000	ATCOPIA31A	LTR/COPIA
AT2TE13685	ATCOPIA32	LTR/COPIA
AT3TE67635	ATCOPIA32	LTR/COPIA
AT2TE27820	ATCOPIA36	LTR/COPIA
AT2TE28325	ATCOPIA38B	LTR/COPIA
AT2TE31290	ATCOPIA39	LTR/COPIA
AT1TE55795	ATCOPIA4	LTR/COPIA
AT4TE42860	ATCOPIA4	LTR/COPIA
AT3TE60020	ATCOPIA40	LTR/COPIA
AT4TE85580	ATCOPIA45	LTR/COPIA
AT4TE67490	ATCOPIA46	LTR/COPIA
AT4TE50435	ATCOPIA47	LTR/COPIA
AT1TE66380	ATCOPIA48	LTR/COPIA
AT3TE42075	ATCOPIA49	LTR/COPIA
AT5TE83215	ATCOPIA49	LTR/COPIA
AT1TE57530	ATCOPIA49	LTR/COPIA
AT3TE45800	ATCOPIA5	LTR/COPIA
AT4TE27640	ATCOPIA50	LTR/COPIA
AT4TE25200	ATCOPIA51	LTR/COPIA
AT3TE76225	ATCOPIA52	LTR/COPIA
AT4TE22095	ATCOPIA55	LTR/COPIA
AT2TE84970/AT2TE84975/AT2TE84980/AT2TE84985	ATCOPIA57	LTR/COPIA
AT4TE30225	ATCOPIA57	LTR/COPIA
AT2TE10495	ATCOPIA58	LTR/COPIA
AT5TE68140	ATCOPIA58	LTR/COPIA
AT3TE63765	ATCOPIA62	LTR/COPIA
AT5TE69240/AT5TE69245/AT5TE69250	ATCOPIA62/ATCOPIA61/ATCOPIA62	LTR/COPIA
AT1TE57025	ATCOPIA63	LTR/COPIA
AT3TE48480	ATCOPIA63	LTR/COPIA
AT3TE51550	ATCOPIA63	LTR/COPIA
AT1TE19430	ATCOPIA64	LTR/COPIA
AT3TE38565	ATCOPIA65	LTR/COPIA
AT3TE55430	ATCOPIA65	LTR/COPIA
AT1TE46405	ATCOPIA66	LTR/COPIA
AT2TE35840	ATCOPIA69	LTR/COPIA
AT4TE25100	ATCOPIA69	LTR/COPIA
AT4TE28200	ATCOPIA7	LTR/COPIA
AT2TE29450	ATCOPIA70	LTR/COPIA
AT2TE30555	ATCOPIA71	LTR/COPIA
AT2TE37050	ATCOPIA72	LTR/COPIA
AT2TE38575	ATCOPIA74	LTR/COPIA
AT2TE42485	ATCOPIA75	LTR/COPIA
AT2TE38900/AT2TE38910	ATCOPIA76	LTR/COPIA
AT1TE71045	ATCOPIA78	LTR/COPIA
AT3TE89830	ATCOPIA78	LTR/COPIA
AT5TE15240	ATCOPIA78	LTR/COPIA
AT3TE68090	ATCOPIA81	LTR/COPIA
AT3TE40420	ATCOPIA82	LTR/COPIA
AT5TE56665	ATCOPIA83	LTR/COPIA
AT5TE77610	ATCOPIA85	LTR/COPIA
AT5TE23185	ATCOPIA89	LTR/COPIA
AT2TE12510	ATCOPIA8A	LTR/COPIA
AT1TE71775	ATCOPIA8B	LTR/COPIA
AT2TE26230	ATCOPIA9	LTR/COPIA
AT5TE23285	ATCOPIA90	LTR/COPIA
AT4TE10320	ATCOPIA93	LTR/COPIA
AT5TE20395	ATCOPIA93	LTR/COPIA
AT3TE48530/AT3TE48535	ATCOPIA97	LTR/COPIA
AT1TE72060	ATRE1	LTR/COPIA
AT5TE63610	ENDOVIR1	LTR/COPIA
AT1TE53090/AT1TE53095	ENDOVIR1/ATCOPIA58	LTR/COPIA
AT3TE70410	META1	LTR/Copia
AT4TE43250	META1	LTR/Copia
AT4TE44990	META1	LTR/Copia
AT4TE49990	META1	LTR/Copia
AT5TE39170	ATGP1	LTR/Gypsy
AT4TE21295	ATGP1	LTR/Gypsy
AT1TE52795	ATGP1	LTR/Gypsy
AT3TE51505	ATGP1	LTR/Gypsy
AT1TE45560	ATGP1	LTR/Gypsy
AT4TE19675	ATGP1	LTR/Gypsy
AT2TE07550	ATGP1	LTR/Gypsy
AT3TE51930	ATGP1	LTR/Gypsy
AT4TE27915	ATGP1	LTR/Gypsy
AT5TE33235	ATGP1	LTR/Gypsy
AT5TE40350	ATGP2	LTR/Gypsy
AT2TE00075	ATGP2	LTR/Gypsy
AT2TE11540	ATGP2	LTR/Gypsy
AT2TE17875	ATGP2	LTR/Gypsy
AT3TE47595	ATGP2	LTR/Gypsy
AT4TE23410	ATGP2N	LTR/Gypsy
AT2TE00035/AT2TE00045	ATGP2N	LTR/Gypsy
AT1TE51245	ATGP2N	LTR/Gypsy
AT5TE36830	ATGP2N	LTR/Gypsy
AT3TE16035	ATGP3	LTR/Gypsy
AT3TE54455	ATGP3	LTR/Gypsy
AT1TE45315	ATGP3	LTR/Gypsy
AT3TE82555	ATGP3	LTR/Gypsy
AT3TE61290	ATLANTYS2	LTR/Gypsy
AT5TE41615	ATLANTYS2	LTR/Gypsy
AT1TE37790	ATREP1	RC/Helitron
AT1TE60645	ATREP1	RC/Helitron
AT3TE84475	ATREP1	RC/Helitron
AT5TE66775/AT5TE66790	ATREP10	RC/Helitron
AT2TE37235	ATREP10	RC/Helitron
AT5TE28355	ATREP10	RC/Helitron
AT3TE69035	ATREP10A	RC/Helitron
AT1TE43845	ATREP10B	RC/Helitron
AT3TE58660	ATREP10B	RC/Helitron
AT4TE50445	ATREP11	RC/Helitron
AT3TE44695	ATREP12	RC/Helitron
AT5TE86350	ATREP12	RC/Helitron
AT4TE34395	ATREP13	RC/Helitron
AT5TE26820	ATREP2	RC/Helitron
AT4TE34740	ATREP2A	RC/Helitron
AT2TE58200	ATREP3	RC/Helitron
AT5TE56435	ATREP3	RC/Helitron
AT4TE05105	ATREP3	RC/Helitron
AT1TE98910	ATREP3	RC/Helitron
AT2TE28205	ATREP3	RC/Helitron
AT4TE38980	ATREP3	RC/Helitron
AT4TE47470	ATREP3	RC/Helitron
AT2TE77780	ATREP3	RC/Helitron
AT3TE70130	ATREP3	RC/Helitron
AT4TE35580	ATREP3	RC/Helitron
AT1TE76530	ATREP3	RC/Helitron
AT3TE25425	ATREP4	RC/Helitron
AT2TE23905	ATREP5	RC/Helitron
AT5TE07950	ATREP5	RC/Helitron
AT2TE03100	ATREP6	RC/Helitron
AT2TE03505	ATREP6	RC/Helitron
AT2TE09395	ATREP6	RC/Helitron
AT2TE27280	ATREP7	RC/Helitron
AT3TE50230	ATREP7	RC/Helitron
AT1TE43170	ATREP8	RC/Helitron
AT4TE34695	ATREP8	RC/Helitron
AT3TE58655	HELITRON5	RC/Helitron
AT1TE36060	HELITRONY1C	RC/Helitron
AT1TE11380	HELITRONY1E	RC/Helitron
AT1TE40120	HELITRONY3	RC/Helitron
AT1TE34015	HELITRONY3	RC/Helitron
