# Supplementary material for: The Arabidopsis thaliana mobilome and its impact at the species level
Source: eLife journal article supplement (doi:10.7554/elife.15716), 2016-06-03
Supplement: supp [file elife-15716-supp-v1.zip › elife_poa_e15716_Supplementary_File_5.txt]

Chr	Position	rho/Kb
1	508	1.55306
1	698	1.53276
1	6059	0.78563
1	17658	0.77628
1	21829	0.60401
1	30356	0.56383
1	31515	0.30295
1	32815	0.21932
1	35856	0.20606
1	44567	0.31824
1	44819	0.28661
1	44822	0.24144
1	48181	0.24155
1	56173	1.85909
1	56519	1.52677
1	56746	1.11632
1	56909	0.92677
1	57686	0.86676
1	61874	0.86695
1	63915	0.86722
1	67914	0.94436
1	68340	0.94517
1	69080	0.90784
1	69137	0.84962
1	69537	0.81325
1	70906	0.79600
1	73047	0.79507
1	75793	0.79883
1	76313	0.79883
1	76552	0.79225
1	77983	0.78586
1	79918	0.73656
1	79977	0.68815
1	86365	2.60167
1	86799	2.91837
1	87682	2.98350
1	87728	2.98627
1	87791	2.98500
1	88298	1.80176
1	88300	0.45607
1	95225	0.45722
1	99805	0.45799
1	99956	0.45830
1	100099	0.45838
1	100314	0.45882
1	104831	0.45946
1	114915	0.49366
1	117592	0.64133
1	118600	0.64001
1	118908	0.63823
1	118982	0.62371
1	120471	0.45151
1	123924	0.44812
1	127891	0.44806
1	129125	0.44807
1	136211	1.24836
1	136416	1.55184
1	137545	1.55946
1	138195	1.55943
1	139832	1.55901
1	140712	1.55923
1	141710	1.55911
1	142940	1.59653
1	143436	1.60091
1	143509	1.60605
1	143604	1.61047
1	143632	1.61047
1	143704	1.61047
1	143941	1.59157
1	143943	1.56806
1	144140	1.56146
1	145734	1.56146
1	146280	1.56369
1	146314	1.56326
1	146471	1.56281
1	146734	1.55926
1	148345	1.55926
1	148357	1.55858
1	148601	1.55858
1	149437	1.55810
1	151180	1.55758
1	151971	1.55946
1	152621	1.55950
1	152685	1.55188
1	153104	1.39754
1	153232	1.29443
1	158640	1.14267
1	158842	0.83049
1	163333	0.82418
1	166465	0.82246
1	168026	0.82244
1	171888	0.82256
1	172053	0.82226
1	177263	0.82278
1	177337	0.82351
1	177400	0.82368
1	180148	0.82539
1	180172	0.82553
1	183790	0.82352
1	190481	0.82352
1	194552	0.82355
1	207711	0.82577
1	207856	0.82654
1	210776	0.82737
1	212828	0.82772
1	217870	0.83227
1	222797	7.80295
1	223147	7.80295
1	223160	7.80707
1	223286	7.76566
1	223752	1.06713
1	238424	1.14100
1	238736	1.13847
1	239259	1.10284
1	240290	1.08136
1	249479	1.24304
1	249866	1.27097
1	252489	7.82244
1	252629	7.93276
1	253125	7.93276
1	253289	7.93276
1	253932	4.28147
1	253933	0.70465
1	261898	0.71410
1	262243	0.72254
1	264249	0.72323
1	267613	0.73639
1	267925	0.73917
1	269628	0.73947
1	271050	0.71864
1	275285	0.45256
1	277613	0.24297
1	284187	0.24923
1	285729	0.24995
1	286029	0.24956
1	291737	0.64972
1	292381	0.73111
1	294969	0.81630
1	299439	1.11734
1	304281	1.67417
1	304360	1.81536
1	304565	1.81039
1	304582	1.78699
1	304583	1.77821
1	304584	1.75459
1	305330	0.80157
1	305431	0.03945
1	306663	0.03828
1	308370	0.03831
1	308809	0.04161
1	309185	1.13426
1	309721	1.24142
1	309828	1.52165
1	309970	1.43479
1	309991	1.30609
1	309992	1.21393
1	310748	1.21239
1	310895	1.21239
1	310925	1.21361
1	310999	1.21292
1	311064	1.21273
1	311109	1.21108
1	311279	1.21279
1	311610	0.23729
1	311769	0.10164
1	313381	0.09994
1	314506	0.09964
1	315105	0.09985
1	316202	0.09922
1	316941	0.09866
1	317402	0.09797
1	317506	0.09684
1	319630	0.08024
1	319962	0.06040
1	319963	0.04251
1	320065	0.02733
1	320308	0.01775
1	320474	0.01336
1	321057	0.01325
1	321370	0.01317
1	321615	0.01317
1	321814	0.01317
1	321897	0.01317
1	322374	0.01317
1	322671	0.01317
1	323469	0.04684
1	323512	0.07909
1	325033	1.20234
1	325219	1.36130
1	325669	0.01481
1	325901	0.01304
1	326964	0.01304
1	328365	0.01312
1	328445	0.01312
1	331177	0.01821
1	331269	0.02194
1	331930	0.02538
1	332265	0.02694
1	332266	0.02799
1	333482	0.03022
1	333883	0.03328
1	334454	1.83878
1	334737	0.06564
1	335911	0.06151
1	335990	0.05613
1	338139	0.05588
1	338744	0.05728
1	339648	0.07011
1	340022	0.06196
1	340025	0.05309
1	340810	0.05309
1	341924	0.62009
1	341969	1.74664
1	341982	2.42349
1	342002	2.62148
1	342115	2.48724
1	342116	2.37489
1	342259	4.00415
1	342299	3.57408
1	342305	2.85613
1	342314	0.89475
1	342585	0.72369
1	342763	0.70731
1	342966	0.73148
1	343297	0.79409
1	343437	0.82538
1	343449	0.84831
1	344017	0.86962
1	344140	0.89367
1	344235	0.91913
1	344331	0.93610
1	344370	0.94833
1	344559	1.03573
1	345504	4.11482
1	346016	3.22289
1	346022	2.20817
1	346038	0.80133
1	346123	0.50803
1	347128	0.50646
1	349119	0.51851
1	349186	0.52067
1	349197	0.54002
1	349208	0.59159
1	349211	0.64890
1	349310	6.94249
1	349437	0.03753
1	349786	0.03719
1	350398	0.03733
1	350579	0.03744
1	350606	0.03768
1	350813	0.94309
1	350814	1.73440
1	351374	0.63605
1	351393	0.01606
1	351689	0.01599
1	351711	0.01587
1	351832	0.01587
1	352341	0.01587
1	352381	0.01587
1	352531	0.01587
1	352533	0.01587
1	352571	0.01587
1	352602	0.01587
1	352665	0.01587
1	352842	0.01587
1	352929	0.01589
1	352944	0.01589
1	352953	0.01608
1	352964	0.01608
1	353046	0.01608
1	353106	0.01629
1	353126	0.01629
1	353213	0.84309
1	353230	5.24661
1	353313	5.23937
1	353328	5.22728
1	353927	5.23941
1	354482	5.23941
1	354746	5.23941
1	354987	4.84289
1	355066	1.78692
1	355397	1.67680
1	356214	1.67972
1	356798	1.68071
1	356907	1.68122
1	356942	1.68308
1	357001	1.68344
1	357067	1.68453
1	357082	1.68453
1	357103	1.68626
1	357367	1.68626
1	357449	1.68703
1	357703	1.21477
1	357808	0.71685
1	357814	0.13623
1	359566	0.13592
1	359800	0.13593
1	360798	0.13674
1	360888	0.13701
1	361200	0.13922
1	362150	0.67809
1	362211	1.57795
1	362736	3.46862
1	362763	4.41311
1	363253	4.43853
1	363260	4.44913
1	363374	4.45096
1	363409	4.45096
1	363432	4.45096
1	363510	4.44772
1	363817	4.44188
1	364032	4.44216
1	364231	4.43252
1	364412	3.68900
1	364588	1.34211
1	365411	1.33958
1	366008	1.33368
1	366656	1.36971
1	367150	2.17379
1	367200	3.13205
1	367238	4.09421
1	367383	4.15220
1	367407	4.18108
1	367489	4.16469
1	367698	0.74938
1	368476	0.74640
1	368840	0.74536
1	368962	0.74510
1	369630	0.74349
1	369706	0.74274
1	369812	0.74154
1	369919	0.74065
1	371066	0.74061
1	371098	0.74061
1	371484	0.74070
1	372139	0.74055
1	372163	0.74055
1	372172	0.74054
1	372405	0.74054
1	372438	0.74033
1	372809	0.73953
1	372927	0.73702
1	372938	0.73419
1	373035	0.72842
1	373097	0.72309
1	373685	0.66448
1	373870	0.60485
1	373871	0.54661
1	373872	0.48262
1	373873	0.41793
1	375468	0.11787
1	377334	0.04204
1	377825	0.03473
1	378101	0.06878
1	378458	0.02481
1	379809	0.02061
1	381773	0.02061
1	381817	0.02061
1	382112	0.02061
1	382279	0.02061
1	382525	0.02061
1	382531	0.02061
1	383135	0.02061
1	383235	0.02061
1	383526	0.02080
1	384033	0.69786
1	384046	1.50345
1	384584	0.39349
1	384674	0.03575
1	385892	0.03538
1	387876	0.03525
1	388507	0.03530
1	388705	0.03528
1	389688	2.83475
1	389692	5.01926
1	389853	0.74983
1	389967	0.57750
1	390211	0.57790
1	390415	0.57989
1	390744	0.58119
1	390770	0.56527
1	391323	0.45867
1	391359	0.38053
1	391637	0.24097
1	391986	0.19434
1	392131	0.16934
1	392196	0.14909
1	392351	0.13720
1	392462	0.13280
1	392899	0.13203
1	393109	0.13116
1	393616	0.13110
1	394129	0.13137
1	394552	0.13241
1	395584	0.13241
1	395787	0.13264
1	395878	0.13338
1	396021	0.13338
1	396260	0.13265
1	396277	0.13286
1	397698	0.13115
1	398592	0.12869
1	398995	0.12783
1	399766	0.12903
1	400190	0.14060
1	400593	0.35659
1	401107	0.60219
1	401532	0.62938
1	401762	0.63249
1	401894	0.63712
1	402228	0.63968
1	402676	0.64364
1	403566	0.62892
1	403590	0.62117
1	403594	0.61682
1	403716	0.61527
1	404038	0.61745
1	404108	0.62872
1	404407	0.64197
1	405147	0.65476
1	405164	0.65861
1	405194	0.65326
1	405375	0.59632
1	405583	0.40114
1	405740	0.04841
1	406686	0.04848
1	407205	0.04890
1	408649	0.11261
1	409707	0.19928
1	410187	0.58223
1	410463	0.47111
1	411774	0.54717
1	412046	1.11175
1	412328	0.89390
1	412423	0.92213
1	412683	0.58052
1	412728	0.41730
1	412752	0.31092
1	412872	0.29933
1	412873	0.28445
1	413319	0.36581
1	413335	0.42272
1	413471	0.54928
1	413793	0.56266
1	413800	0.58155
1	413901	0.79107
1	413907	1.01678
1	413908	1.27132
1	413911	1.54323
1	414212	1.59958
1	414314	2.06756
1	414355	2.38912
1	414360	2.63425
1	414453	2.63060
1	414477	2.61982
1	414544	2.61996
1	414574	2.62523
1	414575	2.62721
1	414576	2.62361
1	414692	2.57364
1	414782	1.73250
1	414979	0.96953
1	415015	0.29732
1	415139	0.07456
1	416491	1.05901
1	416534	4.14354
1	416660	4.14995
1	416677	4.15131
1	416697	4.15131
1	416757	4.15145
1	416859	3.10480
1	416915	1.06162
1	416951	0.14545
1	417815	1.03960
1	417891	1.74698
1	417956	1.84137
1	418329	1.80742
1	418434	1.60168
1	418615	0.62953
1	419082	0.59533
1	419617	2.75822
1	419950	3.08800
1	419964	3.30103
1	420000	3.34569
1	420001	3.37180
1	420073	3.37401
1	420098	3.37505
1	420248	3.37502
1	420312	3.37494
1	420321	3.37494
1	420326	3.37499
1	420364	3.37210
1	420397	3.37210
1	420402	3.37267
1	420463	3.37527
1	420478	3.37527
1	420648	0.99680
1	421184	0.99461
1	421470	0.98807
1	421839	4.83289
1	421914	5.14019
1	422054	3.77818
1	422095	2.00583
1	422177	1.48361
1	422491	1.46451
1	422763	4.41334
1	422813	4.81594
1	422833	4.97590
1	422923	4.99616
1	422941	4.99704
1	423139	6.56678
1	423148	7.69724
1	423193	7.76170
1	423200	7.79669
1	423267	7.79669
1	423270	7.79669
1	423308	7.79669
1	423379	7.78735
1	423386	7.77721
1	423438	7.21947
1	423557	5.01928
1	423626	3.97320
1	423681	2.68738
1	423724	2.11697
1	424180	2.82855
1	424278	2.73611
1	424290	2.55567
1	424314	1.75275
1	424328	0.86802
1	425352	0.87775
1	425517	0.89961
1	425764	8.60423
1	425851	8.72255
1	425858	8.83022
1	425870	8.83022
1	425875	8.83022
1	425961	1.84134
1	426281	1.83800
1	426800	1.83795
1	426998	1.83795
1	427069	1.83679
1	427339	1.83708
1	427778	3.42898
1	427795	4.42415
1	427801	5.05034
1	427802	5.62059
1	427824	5.69474
1	428014	1.96074
1	428074	0.68928
1	428124	0.48062
1	428276	0.48815
1	428303	0.49365
1	428315	0.49713
1	428318	0.49745
1	428408	0.50124
1	428447	0.50184
1	428983	2.55686
1	429221	3.23270
1	429380	3.34851
1	429399	3.37993
1	429499	3.38000
1	429505	3.38138
1	429569	3.36766
1	429593	3.35373
1	429620	3.32702
1	429863	3.28915
1	429952	3.23559
1	430057	3.28269
1	430129	7.08747
1	430130	10.86788
1	430164	11.18827
1	430193	11.18827
1	430195	11.18827
1	430202	11.18827
1	430231	6.03205
1	430270	2.41979
1	430287	0.99940
1	430289	0.24253
1	430309	0.24280
1	430340	0.24301
1	430367	0.24445
1	430394	0.24619
1	430488	0.27259
1	430834	0.82049
1	431061	1.24151
1	431340	1.30557
1	431567	1.29131
1	431589	1.28268
1	432021	1.27622
1	432058	1.25307
1	432102	1.20344
1	432240	1.01441
1	432547	0.53776
1	433591	0.67872
1	433893	1.29843
1	433907	1.87766
1	433997	2.77669
1	434093	2.84246
1	434271	1.81694
1	434306	0.48106
1	434462	0.14662
1	435042	0.14872
1	435155	0.16199
1	435313	3.83309
1	435399	6.07178
1	435420	6.25660
1	435455	6.28444
1	435476	6.28969
1	435492	6.29435
1	435495	6.29435
1	435537	6.29435
1	435555	6.29435
1	435680	6.29428
1	435787	6.29428
1	435830	6.29428
1	435849	6.29428
1	435884	6.28116
1	435904	6.26794
1	435990	6.25333
1	436113	6.24769
1	436136	6.24083
1	436138	6.23127
1	436166	6.20585
1	436249	6.18127
1	436250	6.14114
1	436273	6.07962
1	436287	6.02053
1	436298	5.91635
1	436331	5.87668
1	436638	5.85416
1	436707	5.62708
1	436790	3.24370
1	436936	2.79086
1	436995	1.69005
1	437174	1.46900
1	437510	1.47214
1	437704	1.47729
1	437745	1.47729
1	437760	1.47792
1	438255	1.39897
1	438265	1.34060
1	438386	1.28693
1	438572	1.27765
1	438929	1.27535
1	439390	1.27574
1	439434	1.27541
1	439837	1.27462
1	440140	1.27524
1	440330	1.27495
1	440434	1.27433
1	440728	1.27433
1	440781	1.27379
1	440910	1.27205
1	441102	1.26852
1	441566	1.65560
1	441653	2.26159
1	441892	2.28438
1	441974	2.29422
1	441998	2.29949
1	442046	2.30819
1	442244	2.29837
1	442418	2.29455
1	442420	2.29166
1	442513	2.28377
1	442543	2.27948
1	442583	2.28361
1	442758	2.36492
1	442772	2.45272
1	442956	2.50710
1	442957	2.54589
1	442993	2.59682
1	443036	2.72040
1	443093	2.62086
1	443322	1.69401
1	443400	0.79599
1	443412	0.11014
1	443677	0.11026
1	443746	0.11026
1	444033	0.11010
1	444099	0.11005
1	444345	0.11545
1	444540	0.39176
1	444632	1.16116
1	444764	1.32811
1	444798	1.39235
1	444804	1.45897
1	444808	1.51865
1	444912	1.55015
1	444936	1.58126
1	444960	1.62759
1	445038	1.63654
1	445257	1.63150
1	445271	1.63221
1	445414	1.62655
1	445526	1.72689
1	445576	2.00297
1	445672	2.58263
1	445838	2.55052
1	445839	2.53233
1	445982	2.51317
1	446022	2.49841
1	446096	2.44646
1	446316	1.99007
1	446424	0.63255
1	446645	0.63228
1	446679	0.63742
1	446870	4.53077
1	446882	6.42379
1	446971	6.44666
1	446979	6.45322
1	447015	6.45322
1	447072	6.45043
1	447125	6.36464
1	447184	4.95319
1	447207	2.33144
1	447325	2.05801
1	447338	1.73991
1	447555	1.53418
1	447969	1.47954
1	448206	1.29211
1	448331	0.47186
1	449510	0.46901
1	449560	0.46737
1	449689	0.46479
1	450466	0.46426
1	452584	0.49983
1	453120	0.50648
1	453370	0.52042
1	453652	0.58329
1	454260	2.46360
1	454708	2.49045
1	454711	2.50688
1	454865	3.59255
1	455326	3.62294
1	455765	4.25453
1	455960	18.18766
1	455968	19.43119
1	455978	19.53345
1	455996	19.53345
1	456051	19.53345
1	456061	19.53345
1	456125	19.53345
1	456127	19.53345
1	456291	12.33499
1	456325	1.47908
1	456405	1.44989
1	456411	1.45164
1	456421	1.43613
1	456552	1.43333
1	456561	1.43242
1	456689	1.43173
1	457225	1.43157
1	457788	1.43089
1	458079	1.43092
1	458428	1.42912
1	458911	1.42912
1	459021	1.42995
1	459460	1.43065
1	460845	1.45357
1	460947	1.47106
1	461327	1.49186
1	461483	1.49962
1	461788	1.50936
1	463581	3.29997
1	463954	3.50801
1	463965	3.57149
1	464075	3.42194
1	464103	2.91667
1	464909	2.67345
1	464929	2.45288
1	465237	2.40659
1	465427	2.39838
1	465556	2.40011
1	466372	2.39129
1	466386	2.39029
1	466893	2.36255
1	467200	2.40748
1	467281	3.17496
1	467322	3.70173
1	467517	14.82752
1	467614	14.81082
1	467616	14.78979
1	467620	14.74525
1	467663	3.25389
1	468498	3.28273
1	469581	3.28623
1	469655	3.28623
1	469995	3.28578
1	470557	3.28578
1	470665	3.28578
1	470901	3.28578
1	470978	3.28578
1	471095	3.28578
1	471508	3.28578
1	471543	3.27699
1	472391	3.27699
1	472498	3.27699
1	472826	2.67904
1	472856	2.16922
1	472874	1.70654
1	472939	1.47164
1	473128	1.58657
1	473585	1.61515
1	473647	1.63177
1	473752	1.64888
1	473873	1.66514
1	474096	1.68295
1	474278	1.61781
1	474323	1.51635
1	474387	1.31219
1	474406	1.10875
1	474563	0.92299
1	474669	0.73116
1	475022	0.65257
1	476773	0.64898
1	477359	5.24553
1	477576	5.30358
1	477582	5.35803
1	477663	5.36021
1	477738	5.23014
1	477791	4.72844
1	477828	3.56580
1	477876	2.04418
1	478276	2.04965
1	478483	2.07429
1	478484	2.10808
1	478577	2.11890
1	478601	2.12803
1	478667	2.13364
1	478763	2.13213
1	478914	2.13056
1	478956	2.23768
1	479147	3.86223
1	479149	5.67931
1	479316	5.67931
1	479320	5.67776
1	479322	5.67776
1	479328	5.67776
1	479502	3.21790
1	479508	1.02078
1	479776	1.02286
1	479950	1.01435
1	480303	1.01262
1	481677	1.04460
1	481692	1.06931
1	481720	1.10271
1	482015	1.29108
1	482217	1.42230
1	482521	1.42990
1	482966	1.47985
1	483006	1.58405
1	483463	4.13899
1	483634	4.19944
1	483637	4.24359
1	483975	4.26907
1	484375	4.28824
1	484651	4.30078
1	485242	4.36347
1	485490	4.36751
1	486148	4.36751
1	486486	4.36751
1	486500	4.36751
1	486545	4.36751
1	486711	4.36892
1	486940	4.36892
1	487535	4.36892
1	487641	4.36765
1	487725	4.35249
1	487822	1.17692
1	488025	3.10657
1	488056	5.33487
1	488205	5.31118
1	488206	5.26683
1	488255	3.53053
1	488265	1.14603
1	489092	1.14648
1	489425	1.19203
1	489664	1.26348
1	489844	1.20076
1	489857	1.12443
1	490351	0.77349
1	490910	0.75628
1	491042	0.73276
1	491131	0.70845
1	491725	0.72485
1	492528	1.00455
1	492593	1.52285
1	492798	4.58206
1	492811	5.11113
1	492831	5.13431
1	492856	5.00688
1	492916	4.56138
1	492923	3.30725
1	492931	0.57963
1	493155	0.54185
1	493349	0.54166
1	493402	0.54411
1	493406	0.54291
1	493507	0.54996
1	493529	0.58841
1	493553	0.70562
1	493576	0.93643
1	493986	0.54324
1	494700	0.52728
1	494725	0.51043
1	495164	0.50222
1	495372	0.49352
1	495487	0.47759
1	496209	0.68655
1	496219	0.92043
1	496489	1.09523
1	496977	1.49311
1	497447	1.58807
1	497722	4.49912
1	497817	10.01266
1	497953	3.93056
1	497991	0.51493
1	498555	0.54376
1	498584	0.56387
1	498788	0.66793
1	499234	1.05581
1	499950	1.05756
1	500001	1.06152
1	500436	1.06398
1	500835	1.06391
1	500921	1.06519
1	501347	4.58201
1	501445	4.63480
1	501451	4.70468
1	501524	4.72138
1	501564	4.72035
1	501627	4.70994
1	501654	4.56343
1	501812	3.30101
1	502092	3.26614
1	502177	2.53305
1	502178	1.86947
1	503092	1.86499
1	503836	1.87124
1	503930	1.89160
1	504881	1.89646
1	504882	1.90414
1	505086	2.08995
1	505347	3.40483
1	505651	4.08788
1	505652	4.56707
1	505653	5.00037
1	505654	5.44936
1	505764	5.06508
1	505768	4.53857
1	505948	4.16267
1	506098	4.14161
1	506287	0.48478
1	507678	0.47721
1	507706	0.46566
1	507751	0.45885
1	507772	0.44918
1	509633	0.76684
1	509713	1.39666
1	510371	2.89911
1	510373	4.36788
1	510377	5.52356
1	510567	4.40327
1	510568	3.58319
1	510569	2.76428
1	510570	1.81776
1	510792	1.01118
1	511517	1.99772
1	511561	2.58034
1	511810	2.57582
1	511852	2.56989
1	512272	2.56816
1	512302	2.56816
1	512681	8.55588
1	512692	11.87441
1	512758	12.10237
1	512836	12.10237
1	512866	12.10237
1	512980	12.10237
1	513023	12.10237
1	513070	12.06546
1	513082	11.88008
1	513096	8.58495
1	513097	3.51276
1	514894	3.49537
1	514955	3.41003
1	515072	2.97314
1	515472	0.90109
1	516501	1.54414
1	516613	3.58540
1	516898	9.30997
1	516904	12.24251
1	516907	13.89907
1	516943	13.89907
1	516969	13.45482
1	516984	8.88244
1	517010	1.98187
1	517121	1.99023
1	517452	1.98633
1	517553	1.98474
1	517582	1.97682
1	517669	1.94569
1	518073	1.63182
1	518472	2.11692
1	518499	2.36220
1	518501	2.64208
1	518510	2.83711
1	518570	2.89089
1	518695	2.91508
1	518892	3.85519
1	518897	4.44343
1	518899	5.18525
1	518936	5.99360
1	519011	1.12460
1	519201	1.01441
1	519270	1.02957
1	519342	2.18685
1	519386	2.69620
1	519408	2.76491
1	519456	2.78901
1	519558	2.65282
1	519672	0.61775
1	519804	0.42406
1	519807	0.19236
1	520005	0.18874
1	520049	0.18835
1	520097	0.18890
1	520149	0.19131
1	520313	8.42050
1	520467	8.42050
1	520480	8.42050
1	520549	7.24169
1	520568	3.87987
1	520664	3.82344
1	520668	3.77763
1	520875	3.77878
1	520996	3.76701
1	521183	0.37382
1	521480	0.36281
1	521613	0.36111
1	521803	0.35889
1	521804	0.36149
1	521941	0.73336
1	522044	9.13794
1	522121	6.68628
1	522172	3.88561
1	522173	1.34788
1	522644	11.23290
1	522698	11.23556
1	522701	11.23239
1	522707	11.20904
1	522740	7.21202
1	522744	0.84453
1	523472	4.11679
1	523475	6.46614
1	523544	6.46614
1	523623	6.46614
1	523626	6.46614
1	523682	6.46614
1	523808	5.50997
1	523830	3.69127
1	523837	1.06021
1	524227	1.05861
1	524234	1.06334
1	524353	9.43184
1	524388	12.55967
1	524430	12.57115
1	524442	12.57115
1	524446	12.57115
1	524463	12.57115
1	524506	7.95276
1	524510	0.55641
1	524735	0.56079
1	525156	0.57071
1	525178	0.57198
1	525185	0.57441
1	525674	0.58098
1	525870	0.63989
1	526350	2.18065
1	527208	2.17904
1	527264	2.17665
1	527584	2.17718
1	527611	2.17851
1	527618	2.17785
1	527655	2.17875
1	527711	2.18377
1	527738	2.18457
1	527756	2.18684
1	527811	2.18614
1	527852	2.18308
1	527990	2.16609
1	528048	2.13861
1	528380	2.12502
1	528433	2.11139
1	528455	2.09952
1	528607	2.10615
1	528715	2.17100
1	528813	2.20776
1	528867	2.21948
1	528901	2.22799
1	529064	2.14911
1	529308	1.67194
1	529602	1.66610
1	529667	1.67581
1	529908	1.70307
1	530109	1.72583
1	530553	1.72968
1	530605	1.73184
1	530620	1.73709
1	530622	1.73989
1	530910	7.59738
1	530925	8.18365
1	530943	8.24076
1	530967	8.24910
1	531057	0.08204
1	531781	0.25984
1	531796	0.69707
1	531836	1.73327
1	531856	2.15759
1	531910	2.70675
1	531922	3.18903
1	531947	3.56760
1	531955	3.78236
1	532000	3.81142
1	532189	2.06665
1	532193	0.06922
1	532354	0.05238
1	532586	0.05224
1	532945	0.05224
1	533470	0.07724
1	533479	0.12338
1	533517	3.58817
1	533543	7.84350
1	533647	0.76261
1	533670	0.09098
1	533837	0.08979
1	534072	0.08972
1	534144	0.08972
1	534195	0.08979
1	534336	0.09024
1	534683	2.86199
1	534684	5.77916
1	534747	6.12229
1	534836	0.04373
1	535426	0.04373
1	535460	0.04373
1	535776	0.04368
1	535824	0.04368
1	535954	0.04374
1	535965	0.04369
1	535996	0.04367
1	536192	0.04367
1	536466	2.32405
1	536475	10.27270
1	536564	0.47332
1	536621	0.01161
1	536703	0.01011
1	537100	0.01011
1	537291	0.01012
1	537297	0.01012
1	537531	0.01018
1	537552	0.01018
1	538192	3.04926
1	538503	0.01160
1	538659	0.01159
1	538857	0.01159
1	538917	0.01148
1	538949	0.01148
1	539030	0.01148
1	539144	0.01148
1	539160	0.01145
1	539170	0.01151
1	539238	0.01151
1	539307	0.01151
1	539310	0.01152
1	539323	0.01152
1	539374	0.01149
1	539658	0.01149
1	539733	0.01151
1	539972	0.01753
1	539994	0.02070
1	540035	0.04103
1	540210	0.27122
1	540275	0.51859
1	540315	0.71251
1	540352	0.83354
1	540364	0.96313
1	540446	1.14164
1	540447	1.30054
1	540549	1.30635
1	541090	0.66509
1	541091	0.02365
1	541147	0.01639
1	541184	0.01597
1	541186	0.01593
1	541193	0.01472
1	541410	0.01472
1	541414	0.01472
1	541475	0.01472
1	541499	0.01472
1	541516	0.01472
1	541543	0.01472
1	541544	0.01480
1	541607	0.01483
1	541627	0.01483
1	541658	0.01484
1	541748	0.68796
1	541754	1.53313
1	542392	0.85048
1	542506	0.66510
1	543885	0.66835
1	544248	0.67425
1	544342	0.67937
1	544503	0.68549
1	544813	0.68371
1	545330	0.68170
1	545790	0.67853
1	545853	0.67272
1	545856	0.66683
1	546354	0.66593
1	546684	0.66515
1	548075	1.67759
1	548097	3.37330
1	548101	5.12351
1	548119	5.37989
1	548238	5.37691
1	548284	5.34408
1	548294	5.25193
1	548319	4.56098
1	548447	2.67372
1	548483	1.77364
1	548663	1.86302
1	548705	1.91540
1	548737	1.98099
1	548771	2.04728
1	548785	2.08761
1	548868	2.07984
1	548999	2.07810
1	549192	2.07340
1	549524	2.07274
1	549641	2.06513
1	549645	2.06023
1	549864	4.87140
1	549990	5.19374
1	550077	5.20010
1	550132	5.20010
1	550135	5.20010
1	550172	5.20010
1	550353	5.20010
1	550354	5.19879
1	550528	5.17975
1	550536	5.15340
1	550742	5.09061
1	550856	4.86956
1	550885	4.14719
1	550887	3.36559
1	550889	2.59578
1	550890	1.71215
1	551432	1.73640
1	551821	2.57544
1	551850	3.27771
1	551929	3.67336
1	552009	3.84432
1	552190	3.86675
1	552292	3.87396
1	552366	3.87547
1	552402	3.87421
1	552714	9.54103
1	552721	13.30119
1	552781	13.30119
1	552796	13.30119
1	552825	13.30119
1	552890	13.26524
1	552933	11.77949
1	552944	10.69124
1	552985	9.62229
1	553285	8.75083
1	553300	6.82579
1	553310	3.90946
1	553789	3.90876
1	553991	3.90690
1	554101	3.90463
1	554596	3.93405
1	554693	4.01395
1	554994	4.92308
1	555042	7.41791
1	555052	8.52589
1	555109	8.52692
1	555134	8.52692
1	555232	7.37719
1	555237	6.22182
1	555433	5.46503
1	555482	5.25113
1	555501	4.99915
1	555710	4.82121
1	556432	4.83789
1	556499	4.83789
1	556582	4.83789
1	556803	4.86286
1	556851	4.86135
1	556919	4.84006
1	556960	4.69626
1	557016	3.44476
1	557403	2.95902
1	557507	2.33235
1	557806	2.15213
1	558153	1.51334
1	558966	2.30282
1	558969	3.11895
1	559163	11.92579
1	559266	11.97781
1	559358	11.97781
1	559363	11.97781
1	559372	11.97781
1	559501	11.97781
1	559533	11.97781
1	559547	11.97781
1	559552	11.97591
1	559583	11.74855
1	559692	2.89975
1	560101	2.02818
1	560128	1.33346
1	560315	0.95147
1	562397	0.96392
1	562407	0.98145
1	562477	1.03583
1	562625	1.36105
1	562761	1.71870
1	562937	2.97051
1	562975	3.92155
1	563328	3.93405
1	563336	3.94515
1	563434	3.92964
1	563486	3.84762
1	563534	3.47421
1	563886	3.40472
1	563890	3.33357
1	563895	3.25663
1	564476	1.27683
1	564811	1.07635
1	565127	1.05806
1	565197	1.00120
1	565302	0.97261
1	566579	2.42456
1	566941	2.83192
1	567211	2.87141
1	567457	2.98793
1	567667	3.10059
1	567814	3.11922
1	567819	3.15525
1	568092	3.15122
1	568226	10.95991
1	568281	21.44404
1	568285	26.95365
1	568311	26.95365
1	568321	26.95365
1	568322	26.95365
1	568341	26.95365
1	568351	26.58033
1	568371	2.77425
1	568462	2.82545
1	568463	2.87101
1	568766	2.87238
1	569173	4.56764
1	569257	4.73226
1	569269	4.84904
1	569511	9.45207
1	569536	9.85035
1	569578	9.88683
1	569680	9.88683
1	569715	9.88198
1	569727	9.76364
1	569781	2.27035
1	570322	2.28287
1	570859	2.28372
1	570864	2.28869
1	571205	2.28984
1	571611	2.29115
1	571631	2.29115
1	571638	2.28974
1	571679	2.28886
1	571796	2.27268
1	571955	2.06792
1	572053	1.55795
1	572328	0.49354
1	572586	0.40768
1	572773	0.40728
1	573659	1.47869
1	574059	2.62482
1	574162	2.68123
1	574385	2.68123
1	574393	2.68282
1	574454	2.68277
1	574531	2.67878
1	574603	2.67804
1	574813	2.67804
1	574824	2.67804
1	575042	2.67354
1	575364	1.82697
1	575406	0.99505
1	575612	0.95807
1	575623	0.90165
1	575953	0.88838
1	576108	0.88645
1	576400	0.58900
1	577323	0.04872
1	578277	0.04890
1	578278	0.04856
1	578282	0.04862
1	579414	0.05359
1	579778	0.61143
1	580028	0.96954
1	580768	0.97305
1	580896	0.97273
1	580914	0.97352
1	580944	0.97362
1	580976	0.97090
1	581476	0.96642
1	581733	0.95279
1	581955	2.20337
1	581969	4.97928
1	582038	5.02695
1	582039	5.09001
1	582082	5.09001
1	582166	5.09001
1	582191	5.09001
1	582225	5.09001
1	582280	5.09001
1	582358	5.09001
1	582379	5.09001
1	582380	5.09001
1	582504	5.09119
1	582535	5.09119
1	582574	5.09119
1	582590	5.09119
1	582591	5.09119
1	582601	5.09119
1	582670	5.09119
1	582692	5.09119
1	582729	5.09119
1	582874	4.94461
1	582876	4.75587
1	583057	0.42933
1	583340	0.50067
1	583456	0.80393
1	583573	1.41197
1	584031	1.42987
1	584088	1.43179
1	584156	1.43446
1	584212	1.43017
1	584214	1.42912
1	584217	1.42690
1	584728	0.89553
1	584785	0.20881
1	585101	0.20050
1	585421	0.20541
1	585426	0.21353
1	585725	0.38304
1	585770	0.61656
1	585995	0.76468
1	586205	1.08668
1	586889	2.03357
1	586899	2.70788
1	586938	3.40469
1	587002	3.53506
1	587232	3.25558
1	587244	2.81905
1	587286	2.25997
1	587296	1.54238
1	587692	1.53615
1	587835	1.53595
1	588057	1.53147
1	588464	1.51176
1	588559	1.50789
1	588632	1.52643
1	588710	2.31846
1	588887	1.78894
1	588905	1.48019
1	588915	1.24411
1	589028	1.22280
1	589142	1.31124
1	589196	9.17588
1	589688	9.20986
1	589730	9.20986
1	589736	9.20986
1	589772	9.20986
1	589797	9.20986
1	590336	9.20986
1	590347	9.20986
1	590348	9.20986
1	590349	9.20986
1	590666	9.20986
1	590712	9.20986
1	590750	9.20986
1	591513	9.19435
1	591864	0.64823
1	592765	1.04386
1	592939	1.12616
1	593353	1.07382
1	593384	0.99803
1	593389	0.95219
1	593616	2.69323
1	593619	4.48941
1	593981	4.94423
1	594108	4.94423
1	594141	4.94462
1	594144	4.94462
1	594312	4.88827
1	594340	4.63701
1	594446	0.01851
1	594834	0.01341
1	595072	0.01341
1	595078	0.01341
1	595087	0.01342
1	595285	0.01339
1	596221	0.01339
1	596233	0.01357
1	596257	0.01357
1	596353	0.01435
1	596437	0.01851
1	596487	0.03840
1	596515	0.05120
1	597076	3.15725
1	597172	5.44733
1	597262	5.49864
1	597319	5.49864
1	597404	5.49621
1	597598	5.43049
1	597925	5.42871
1	597928	5.42871
1	597933	5.42585
1	597988	5.37376
1	598039	5.20147
1	598105	2.56206
1	598593	2.64728
1	598737	2.64897
1	598742	2.64897
1	598774	2.64581
1	598880	2.62288
1	599237	2.44053
1	599461	2.08272
1	599568	1.50332
1	599609	0.44885
1	600902	0.44479
1	602008	1.57577
1	602162	8.26885
1	602255	8.18799
1	602256	8.08935
1	602268	7.22937
1	602271	5.84228
1	602290	1.13665
1	602443	1.14409
1	602848	1.16193
1	602895	1.18461
1	603124	1.18987
1	603769	1.18886
1	603815	1.18435
1	603851	1.18239
1	603912	18.52080
1	603956	18.52080
1	603958	18.52080
1	603985	18.52080
1	603998	18.52080
1	604011	18.48283
1	604028	1.93834
1	604370	1.93256
1	605176	2.05906
1	605448	2.06489
1	605706	8.67280
1	605711	16.08355
1	605763	16.72818
1	605775	16.74619
1	605782	16.74619
1	605786	16.74619
1	605826	16.74619
1	605850	16.74619
1	605893	16.74619
1	606019	16.74619
1	606267	16.74619
1	606355	16.74619
1	606437	16.74619
1	606485	16.73000
1	606579	12.85355
1	606634	2.73135
1	606764	2.73573
1	606860	2.72836
1	607128	3.30707
1	607152	4.38105
1	607235	5.27150
1	607258	6.19284
1	607355	7.29591
1	607398	7.83495
1	607493	7.98559
1	607631	8.15259
1	607687	8.15259
1	607706	8.15259
1	607720	8.15259
1	607735	8.16349
1	607742	8.17012
1	607773	8.17012
1	607799	8.16395
1	607802	8.16395
1	607834	8.11956
1	607865	1.76961
1	608165	1.77010
1	608355	1.77346
1	608365	1.77346
1	608366	1.77470
1	608512	1.78278
1	608689	1.84205
1	608889	1.73816
1	609077	1.69533
1	609094	1.66896
1	609132	1.70875
1	609156	1.81458
1	609159	1.95000
1	609197	2.54499
1	609249	3.89205
1	609311	4.14910
1	609446	1.89054
1	609519	1.78696
1	609533	1.74097
1	609619	1.55998
1	609682	0.98730
1	609829	0.85348
1	610364	0.65430
1	610530	0.59640
1	610625	0.58245
1	611041	0.60061
1	611089	0.61494
1	611128	0.64339
1	612246	0.64457
1	612496	0.64486
1	612539	0.64552
1	612567	0.64684
1	612935	0.64715
1	612952	0.64781
1	612962	0.64881
1	614105	0.64961
1	614973	1.25773
1	614977	1.83864
1	614982	2.46160
1	615607	2.48874
1	616374	2.64699
1	616831	4.99855
1	616832	7.14400
1	616982	7.20653
1	617071	7.20653
1	617402	7.20653
1	617467	7.20653
1	617541	7.19843
1	617835	5.25520
1	617873	0.89850
1	618452	0.89709
1	619000	0.89439
1	621036	0.89296
1	621192	1.52927
1	621239	5.39470
1	621426	5.40687
1	621431	5.40687
1	621591	5.40687
1	621605	5.40687
1	621618	5.40687
1	621623	5.40687
1	621789	1.65286
1	621966	1.60619
1	621969	1.54749
1	622074	1.57975
1	622229	1.63491
1	622561	1.85752
1	624063	2.34206
1	624499	2.28327
1	624605	2.26583
1	624660	2.26151
1	624675	2.24992
1	624687	2.22547
1	624717	2.18384
1	624752	2.05019
1	625021	2.04619
1	625276	2.04248
1	625464	2.03329
1	625489	2.02494
1	625803	4.05474
1	625898	4.55409
1	625931	4.76016
1	625954	4.79643
1	625970	4.81028
1	625991	4.82358
1	625996	4.83106
1	626027	4.83930
1	626153	3.38108
1	626191	2.04388
1	626209	0.71147
1	626293	0.23818
1	626569	0.23635
1	626685	0.23600
1	626855	0.23597
1	626926	0.23548
1	627030	0.23522
1	627062	0.23565
1	627925	0.24474
1	628573	0.25047
1	628582	0.25863
1	628630	0.26290
1	628954	0.27089
1	629134	0.28133
1	629265	0.28605
1	630457	0.28705
1	631363	0.28723
1	631562	0.28658
1	631754	0.28718
1	631901	0.29020
1	632372	0.29246
1	632799	0.40825
1	632964	1.80212
1	633694	1.87688
1	633704	1.96536
1	633929	2.42839
1	634228	2.73373
1	634323	2.94045
1	634353	3.08316
1	634388	3.21851
1	634614	3.21934
1	634631	3.21769
1	634639	3.21522
1	634837	2.72787
1	634963	0.94129
1	635670	0.91327
1	635696	0.89518
1	636481	0.87012
1	636766	0.86521
1	636788	0.85305
1	636917	0.84240
1	637274	0.83438
1	637341	0.82567
1	637591	0.81669
1	637916	0.80373
1	637952	0.79225
1	638156	0.77727
1	638653	1.29974
1	638728	2.18469
1	639185	6.95248
1	639187	10.20432
1	639192	11.05187
1	639195	11.52632
1	639264	8.69477
1	639274	4.30405
1	639468	4.30904
1	639546	4.31458
1	639667	4.31458
1	639732	4.23123
1	639756	3.92639
1	639927	3.06264
1	639960	1.84033
1	639961	0.68407
1	640560	1.70093
1	640717	2.60870
1	640788	4.23923
1	640982	4.23923
1	641078	4.23776
1	641097	4.23641
1	641268	4.21174
1	641340	4.97817
1	641383	5.93537
1	641453	5.95368
1	641462	5.96153
1	641525	5.95318
1	641584	5.71716
1	641667	4.40450
1	641675	3.07436
1	642088	3.19295
1	642113	3.23401
1	642284	3.23695
1	642341	3.23777
1	642342	3.24190
1	642568	3.24031
1	642802	1.99094
1	642844	1.26876
1	643130	4.09826
1	643146	7.91831
1	643254	7.94502
1	643294	7.94502
1	643357	7.94502
1	643360	7.95349
1	643447	7.92380
1	643486	7.16884
1	643836	2.69941
1	644148	2.68082
1	644974	2.68433
1	645062	2.68444
1	645063	2.68759
1	645336	2.68035
1	646047	1.40007
1	646106	0.05695
1	646492	0.05700
1	646531	0.05700
1	646603	0.05587
1	648156	0.07701
1	648705	0.31342
1	649288	0.70534
1	650855	0.77831
1	652026	5.11700
1	652281	5.30712
1	652305	5.35177
1	652488	4.26818
1	652489	3.04249
1	652491	1.76998
1	652964	1.21707
1	654656	1.26282
1	655018	1.27143
1	655129	1.26429
1	655180	1.26483
1	655770	1.24311
1	655847	1.23036
1	656193	1.22178
1	656288	1.21460
1	656291	1.20864
1	656792	1.20885
1	657014	1.20948
1	657628	1.26412
1	657898	1.27276
1	658051	1.27841
1	658067	1.28268
1	658423	1.28268
1	658674	1.28403
1	658767	1.28424
1	659340	1.28377
1	660192	1.28417
1	660534	1.29559
1	660944	3.34944
1	661250	4.07740
1	661266	4.69208
1	661720	4.69959
1	662006	4.69959
1	662030	4.69959
1	662857	4.69976
1	662928	4.69976
1	662994	4.69976
1	663000	4.69976
1	663038	4.69976
1	663182	4.69665
1	663474	4.69665
1	663550	4.69665
1	663606	4.69905
1	663702	4.69905
1	663874	4.69905
1	664169	4.70114
1	664196	4.70218
1	664252	4.70218
1	664312	4.70218
1	664349	4.70213
1	664403	4.70213
1	664464	4.70213
1	664671	4.70296
1	664679	4.69765
1	664680	4.69944
1	664701	4.70990
1	664923	5.76695
1	664970	6.81833
1	665023	6.96323
1	665064	6.96323
1	665081	6.96323
1	665123	6.96323
1	665268	4.61864
1	665285	0.34492
1	666092	0.33347
1	666158	0.32728
1	670003	3.93515
1	670041	4.73408
1	670061	5.57656
1	670132	5.65494
1	670157	5.68855
1	670232	5.68855
1	670347	5.68855
1	670351	5.68855
1	670417	5.66677
1	670446	5.65894
1	670453	5.60527
1	670624	5.15748
1	670696	2.11574
1	670803	0.90636
1	671009	0.86106
1	671050	0.78887
1	671312	0.76129
1	672454	0.75747
1	672669	0.75573
1	673473	0.68098
1	673556	0.58438
1	673626	0.48904
1	673785	0.36667
1	674199	0.29514
1	674879	0.28530
1	675578	0.30287
1	676195	0.35664
1	676925	0.46389
1	677150	0.93009
1	677970	2.62195
1	678164	2.63180
1	678264	2.61273
1	678328	2.62492
1	678528	2.62715
1	678747	2.63230
1	678891	2.63209
1	678934	2.63193
1	679076	2.62517
1	679340	2.59226
1	680416	0.07701
1	681554	0.07150
1	681653	0.06511
1	681710	0.05561
1	683186	0.05569
1	683391	0.05591
1	683470	0.05618
1	683540	0.05618
1	683922	0.05618
1	684013	0.05625
1	684357	0.06602
1	684772	0.82248
1	685381	0.92052
1	685486	1.12033
1	685779	0.93770
1	685874	0.92051
1	686224	0.92479
1	686443	0.93801
1	687360	0.93773
1	687536	0.92847
1	687537	0.91900
1	687977	0.39178
1	689553	0.39178
1	689935	0.39177
1	690277	0.39164
1	690418	0.39164
1	691127	0.39502
1	691401	0.39824
1	691581	0.40910
1	691775	0.39301
1	691899	0.39065
1	693350	0.38976
1	693582	0.38929
1	693877	0.38886
1	696215	1.00551
1	696222	1.66673
1	696296	3.56734
1	696460	3.45493
1	696471	3.19731
1	696501	2.53771
1	696504	1.94198
1	697120	2.56668
1	697128	3.06155
1	697144	3.42943
1	697352	3.00656
1	697378	2.60698
1	697398	1.96112
1	697511	1.26761
1	697804	1.19956
1	697890	1.15231
1	698953	1.15763
1	699360	1.16046
1	699542	1.16105
1	700031	1.16098
1	700401	1.16089
1	700862	1.15941
1	700974	1.15631
1	701107	1.15437
1	701961	0.95091
1	702070	0.30116
1	703327	0.28649
1	703360	0.27572
1	704109	0.27544
1	704212	0.27534
1	704748	0.27512
1	706009	0.26369
1	707771	0.21763
1	708523	0.21713
1	708773	0.27375
1	709076	1.50269
1	709476	1.42396
1	709478	1.34892
1	709500	1.25462
1	709552	1.21044
1	709624	1.19045
1	709643	1.15889
1	710166	0.82142
1	710467	0.71636
1	710582	0.67105
1	710875	0.66377
1	711416	1.94043
1	711429	2.79433
1	711699	3.58332
1	711712	3.62866
1	711714	3.63548
1	711720	3.63969
1	711727	3.65273
1	711803	2.85342
1	712015	2.92360
1	712130	2.95949
1	712170	2.97413
1	712277	2.98636
1	712304	2.99570
[truncated: 812,263 more rows]
