# Supplementary figures and images for: The Arabidopsis thaliana mobilome and its impact at the species level
Source: eLife journal article supplement (doi:10.7554/elife.15716), 2016-06-03

# True positives

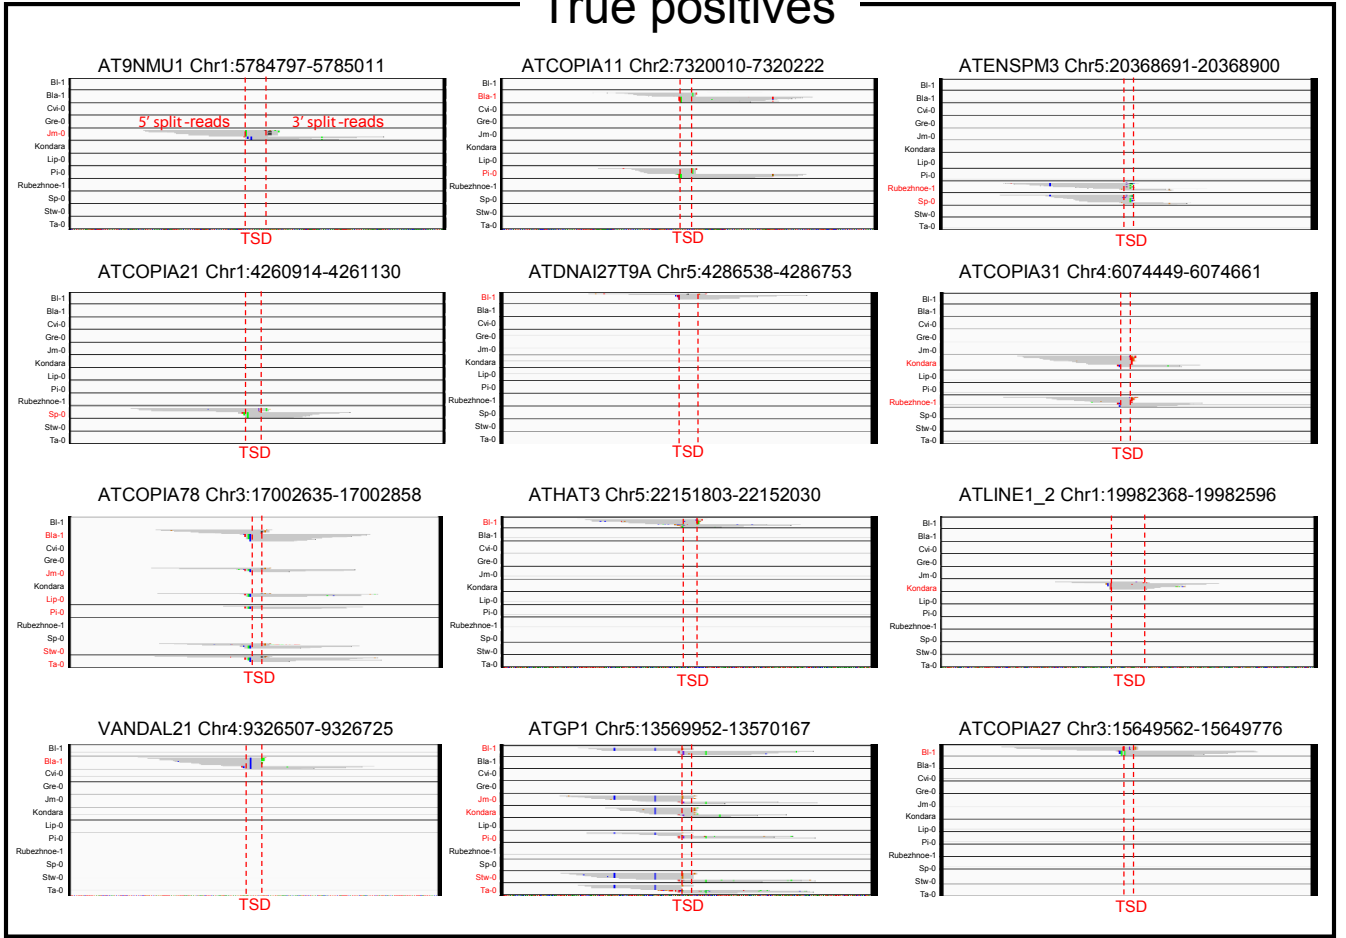

# False positives

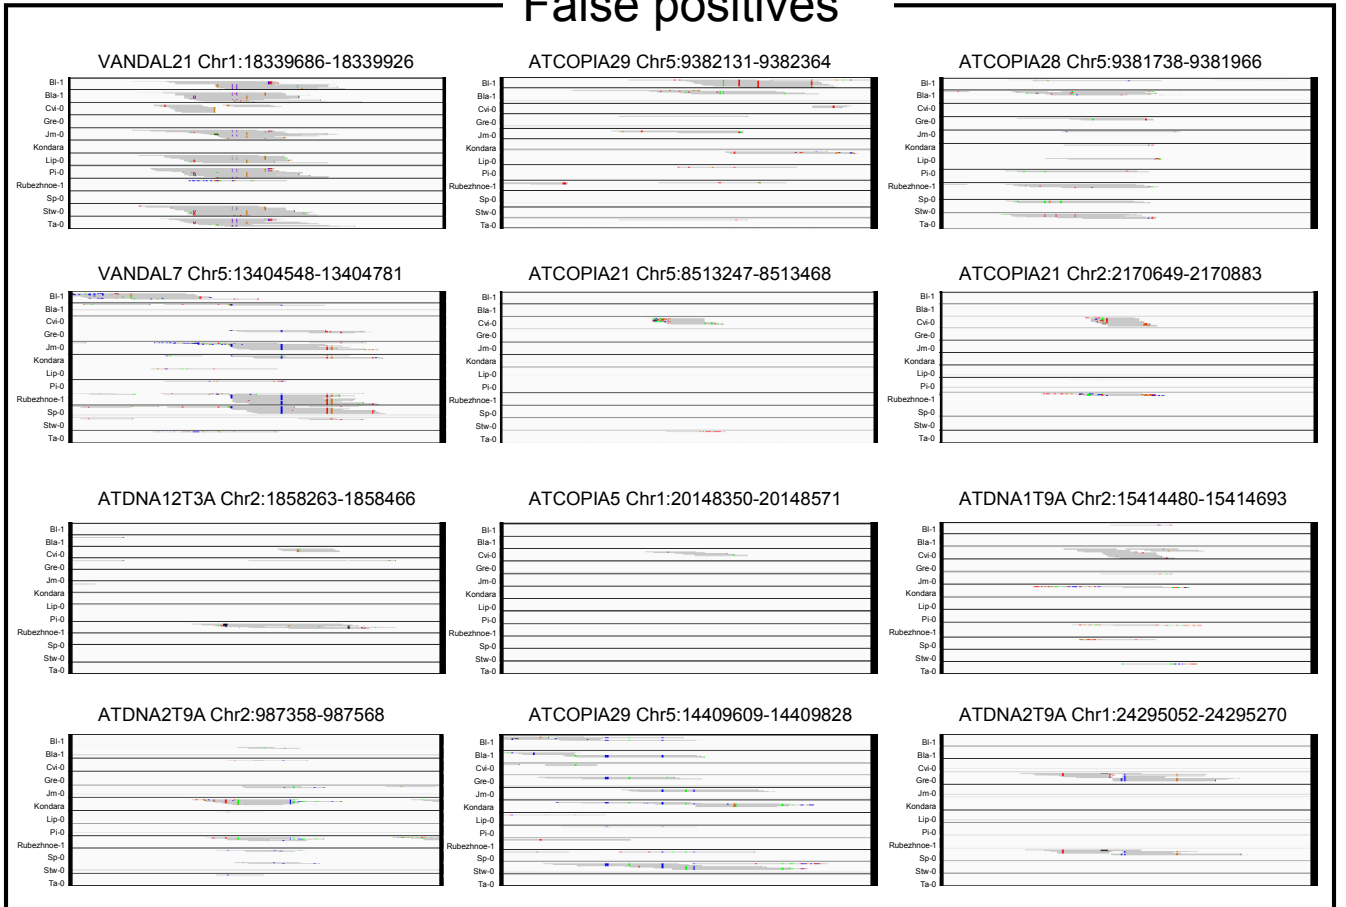

Supplement: supp [file elife-15716-supp-v1.zip › elife_poa_e15716_Figure_1_figure_supplement_2.pdf]

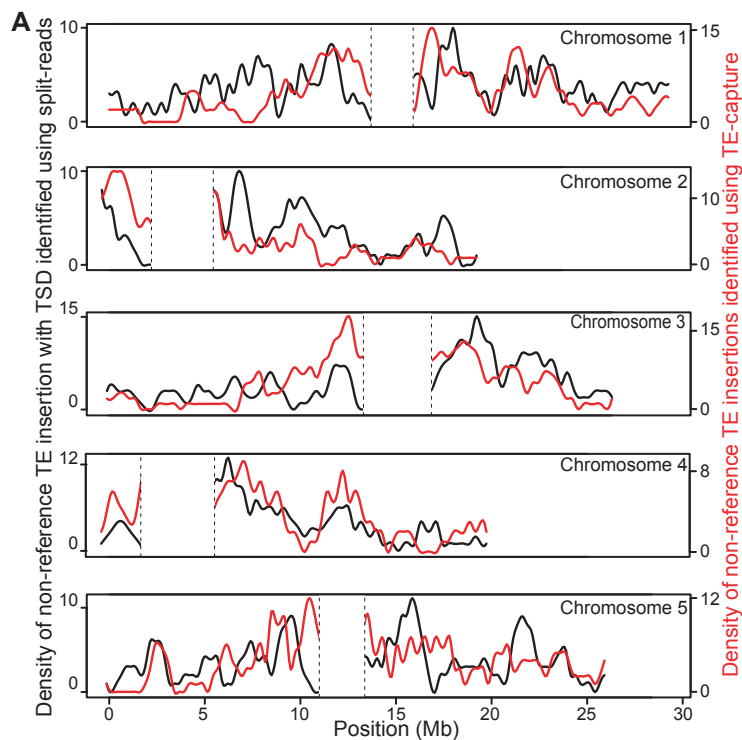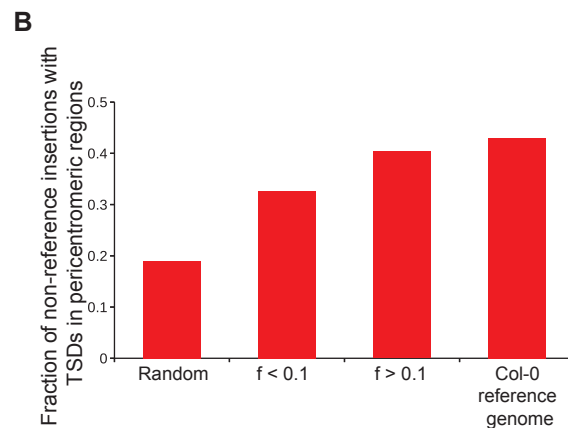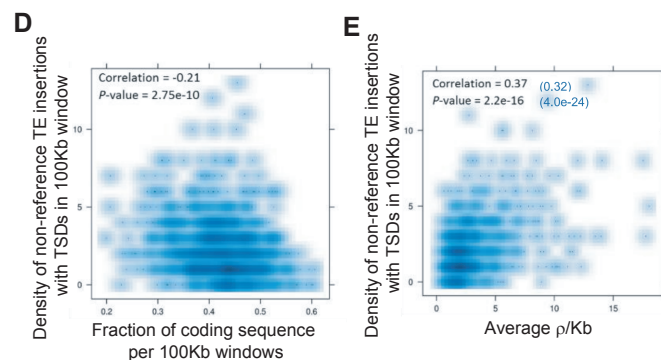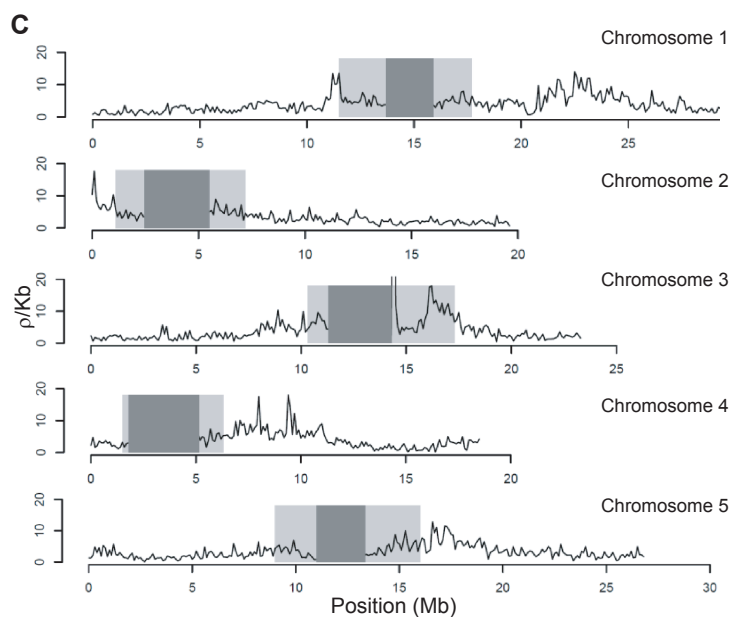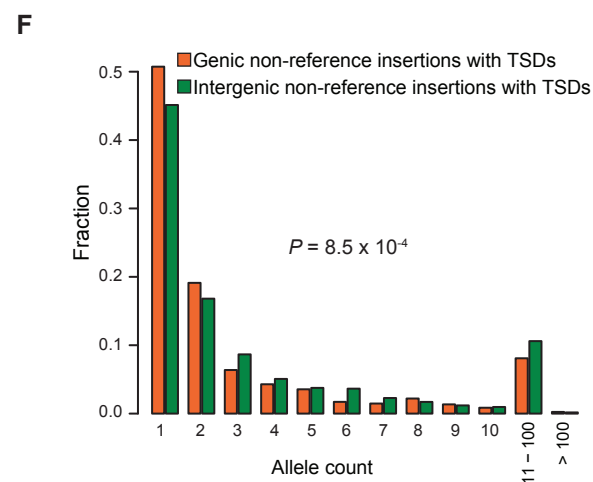

Supplement: supp [file elife-15716-supp-v1.zip › elife_poa_e15716_Figure_3_figure_supplement_1.pdf]

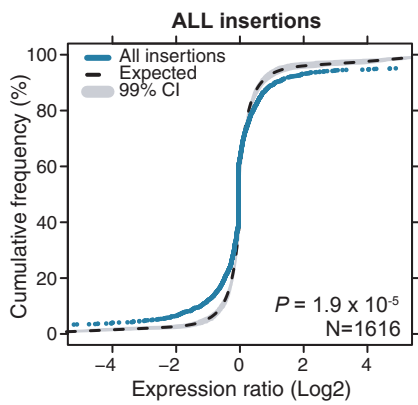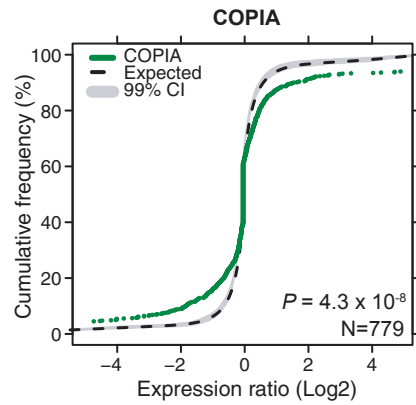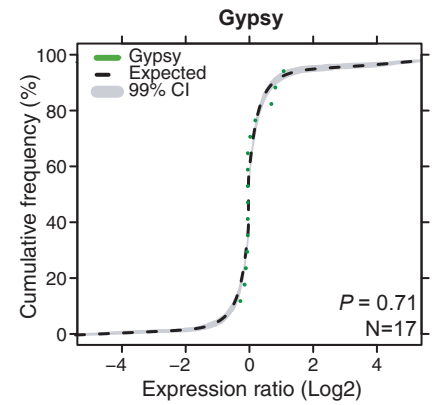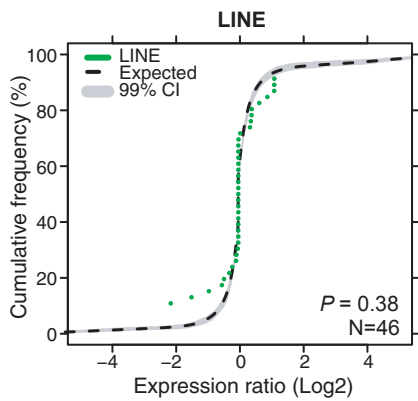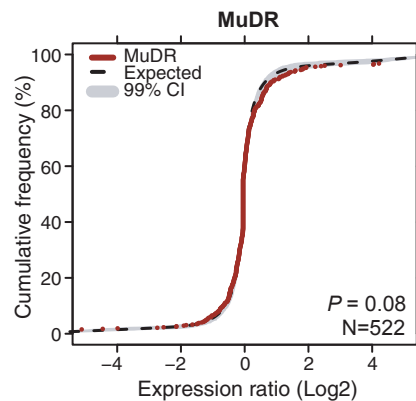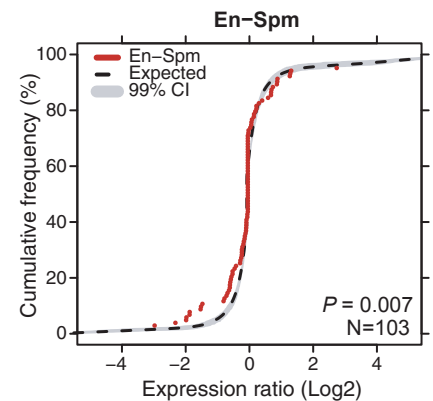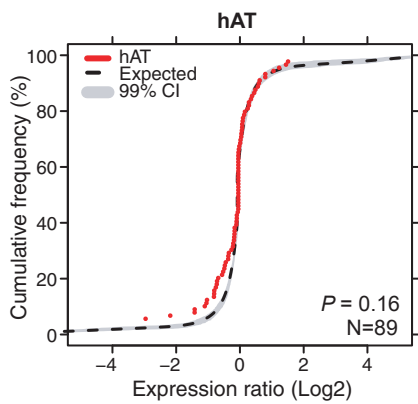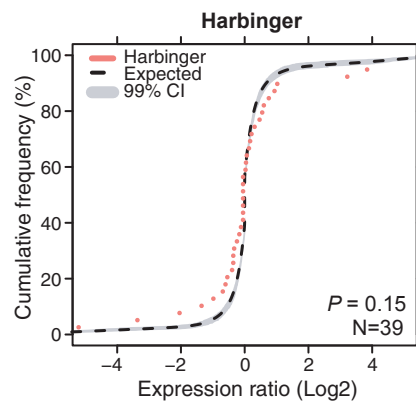

Supplement: supp [file elife-15716-supp-v1.zip › elife_poa_e15716_Figure_3_figure_supplement_3.pdf]

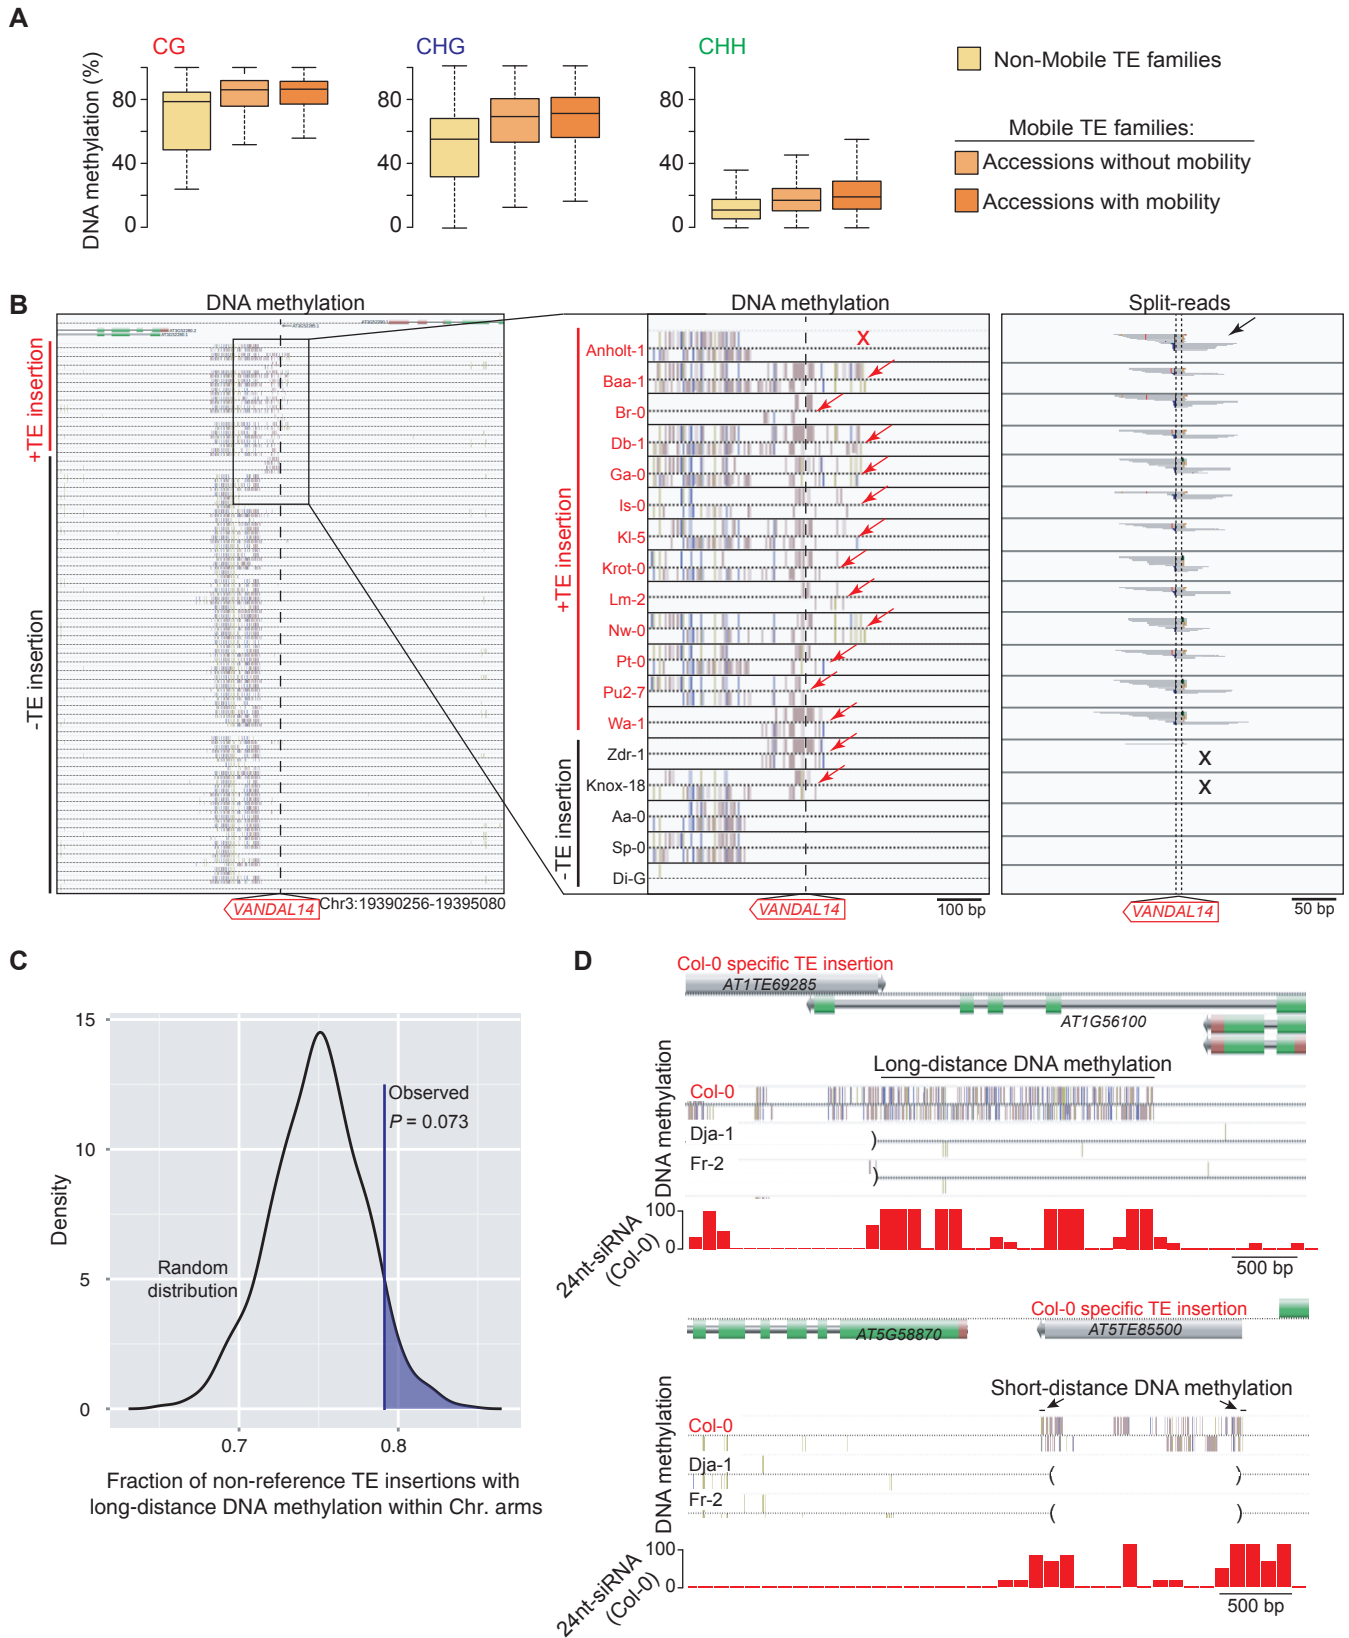

Supplement: supp [file elife-15716-supp-v1.zip › elife_poa_e15716_Figure_4_figure_supplement_1.pdf]

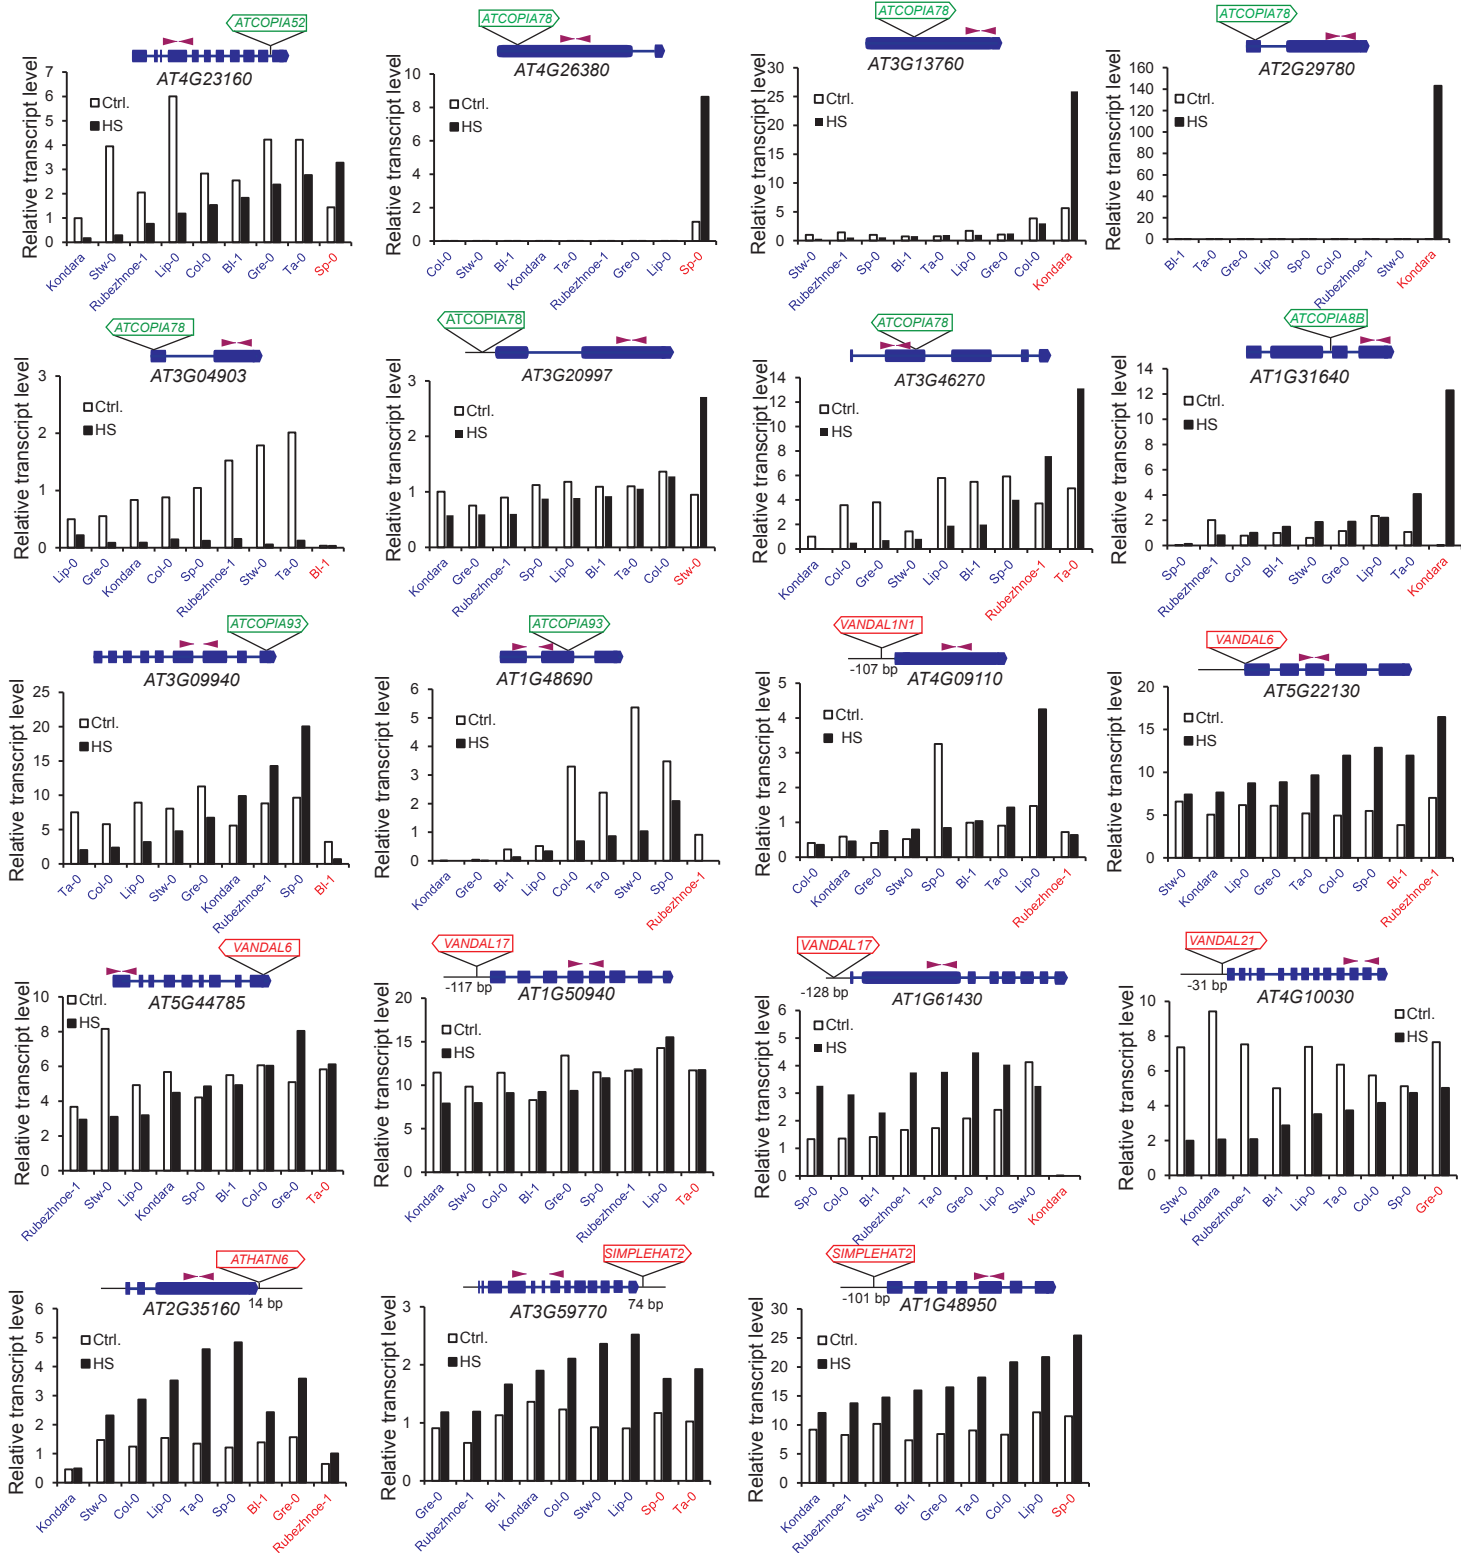

Supplement: supp [file elife-15716-supp-v1.zip › elife_poa_e15716_Figure_3_figure_supplement_4.pdf]

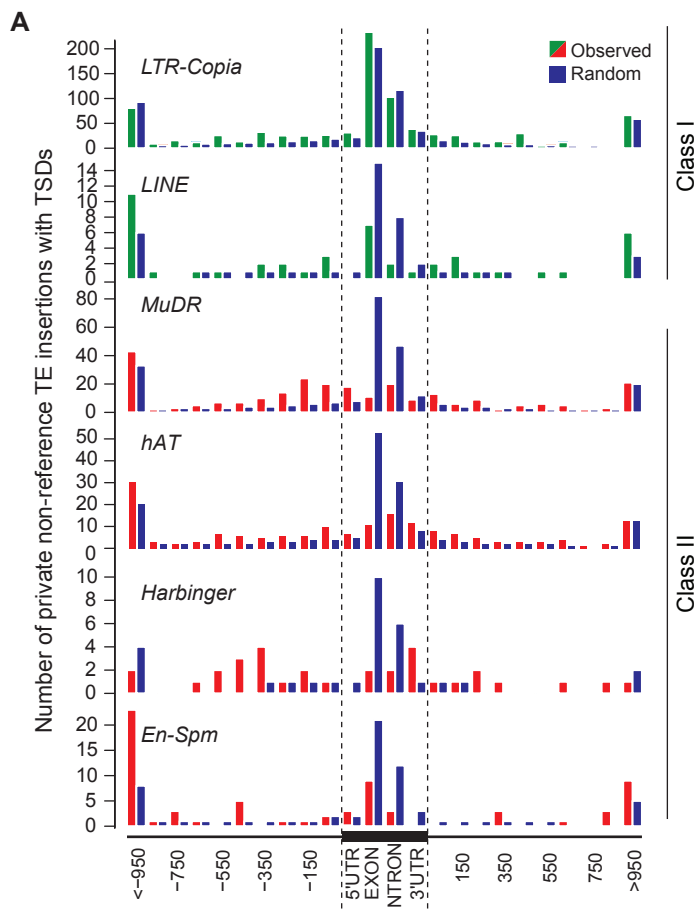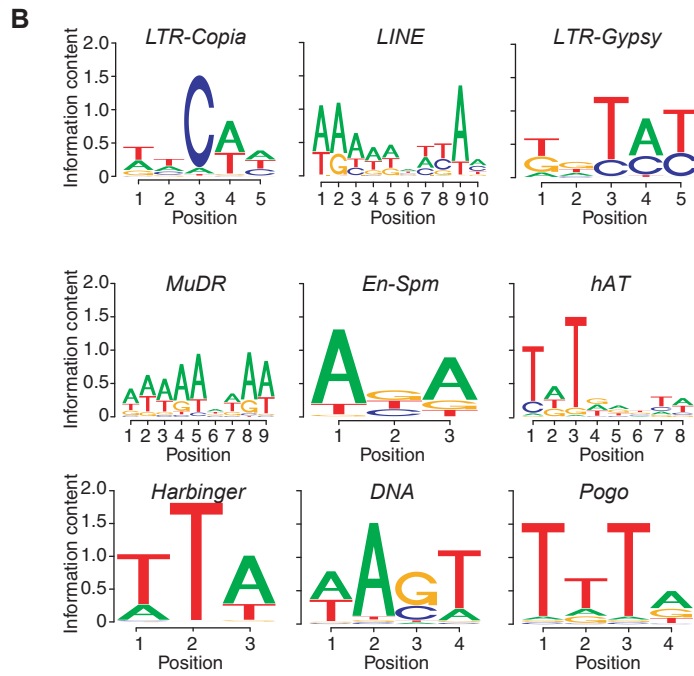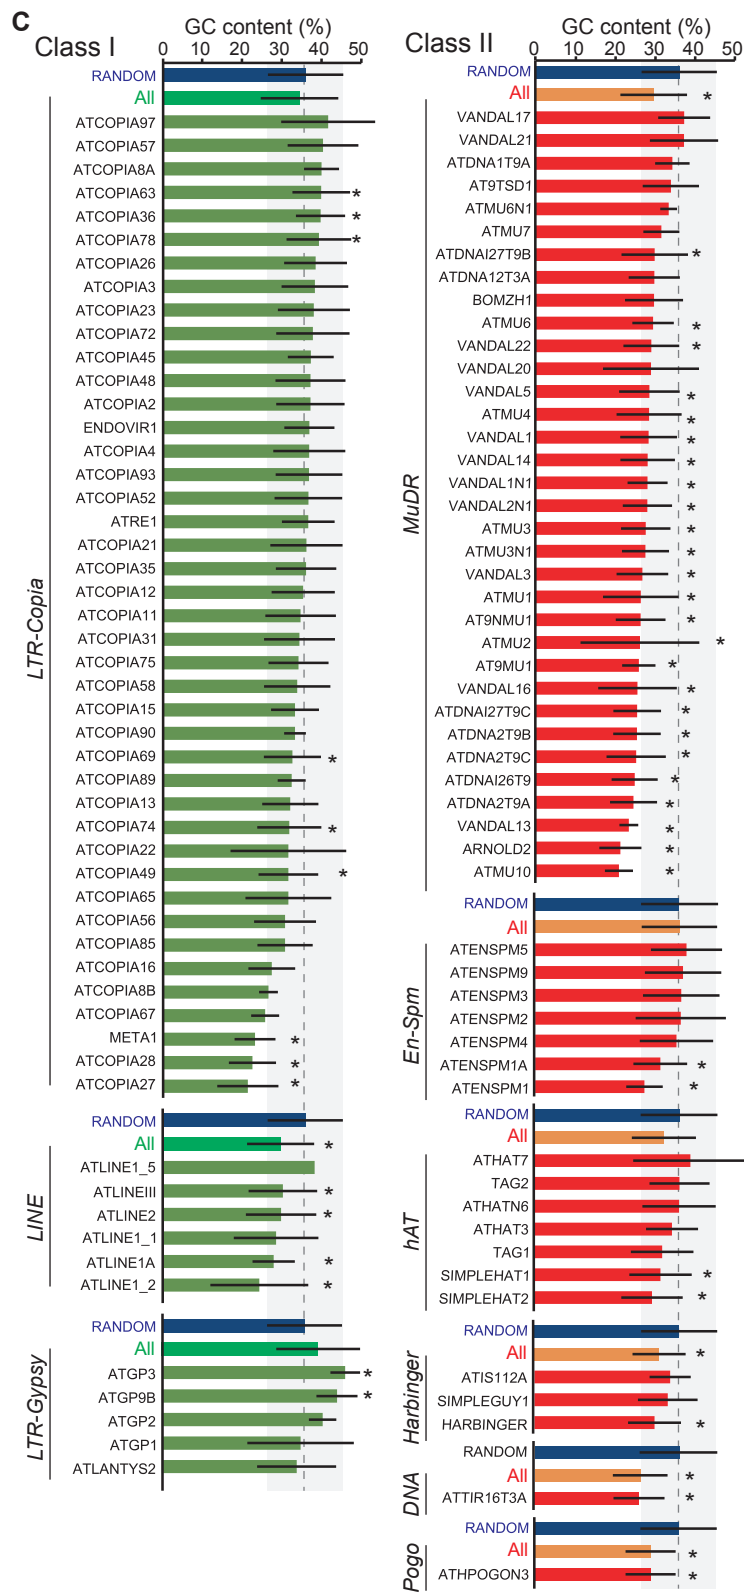

Supplement: supp [file elife-15716-supp-v1.zip › elife_poa_e15716_Figure_3_figure_supplement_2.pdf]

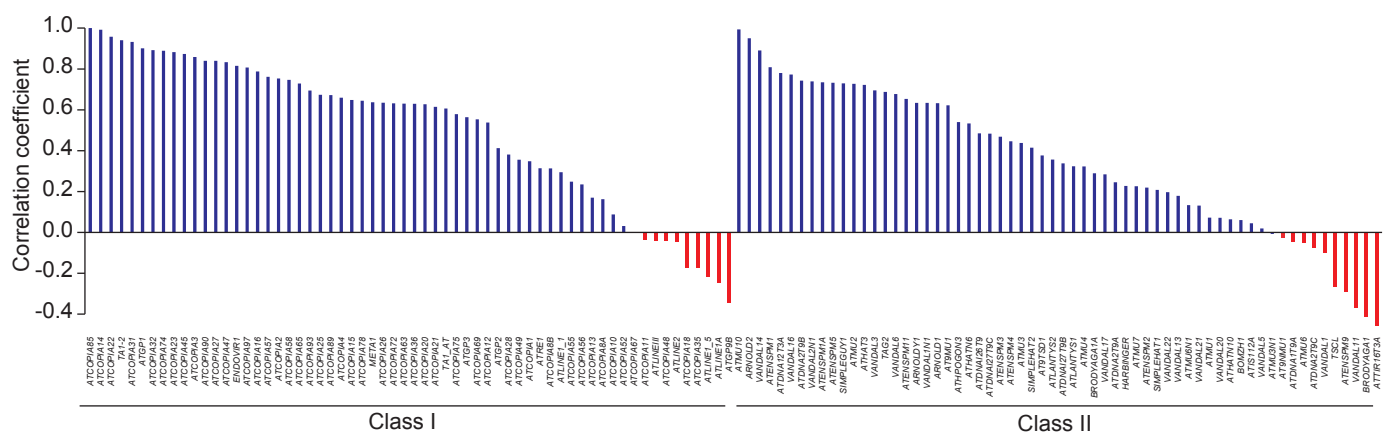

Supplement: supp [file elife-15716-supp-v1.zip › elife_poa_e15716_Figure_2_figure_supplement_1.pdf]

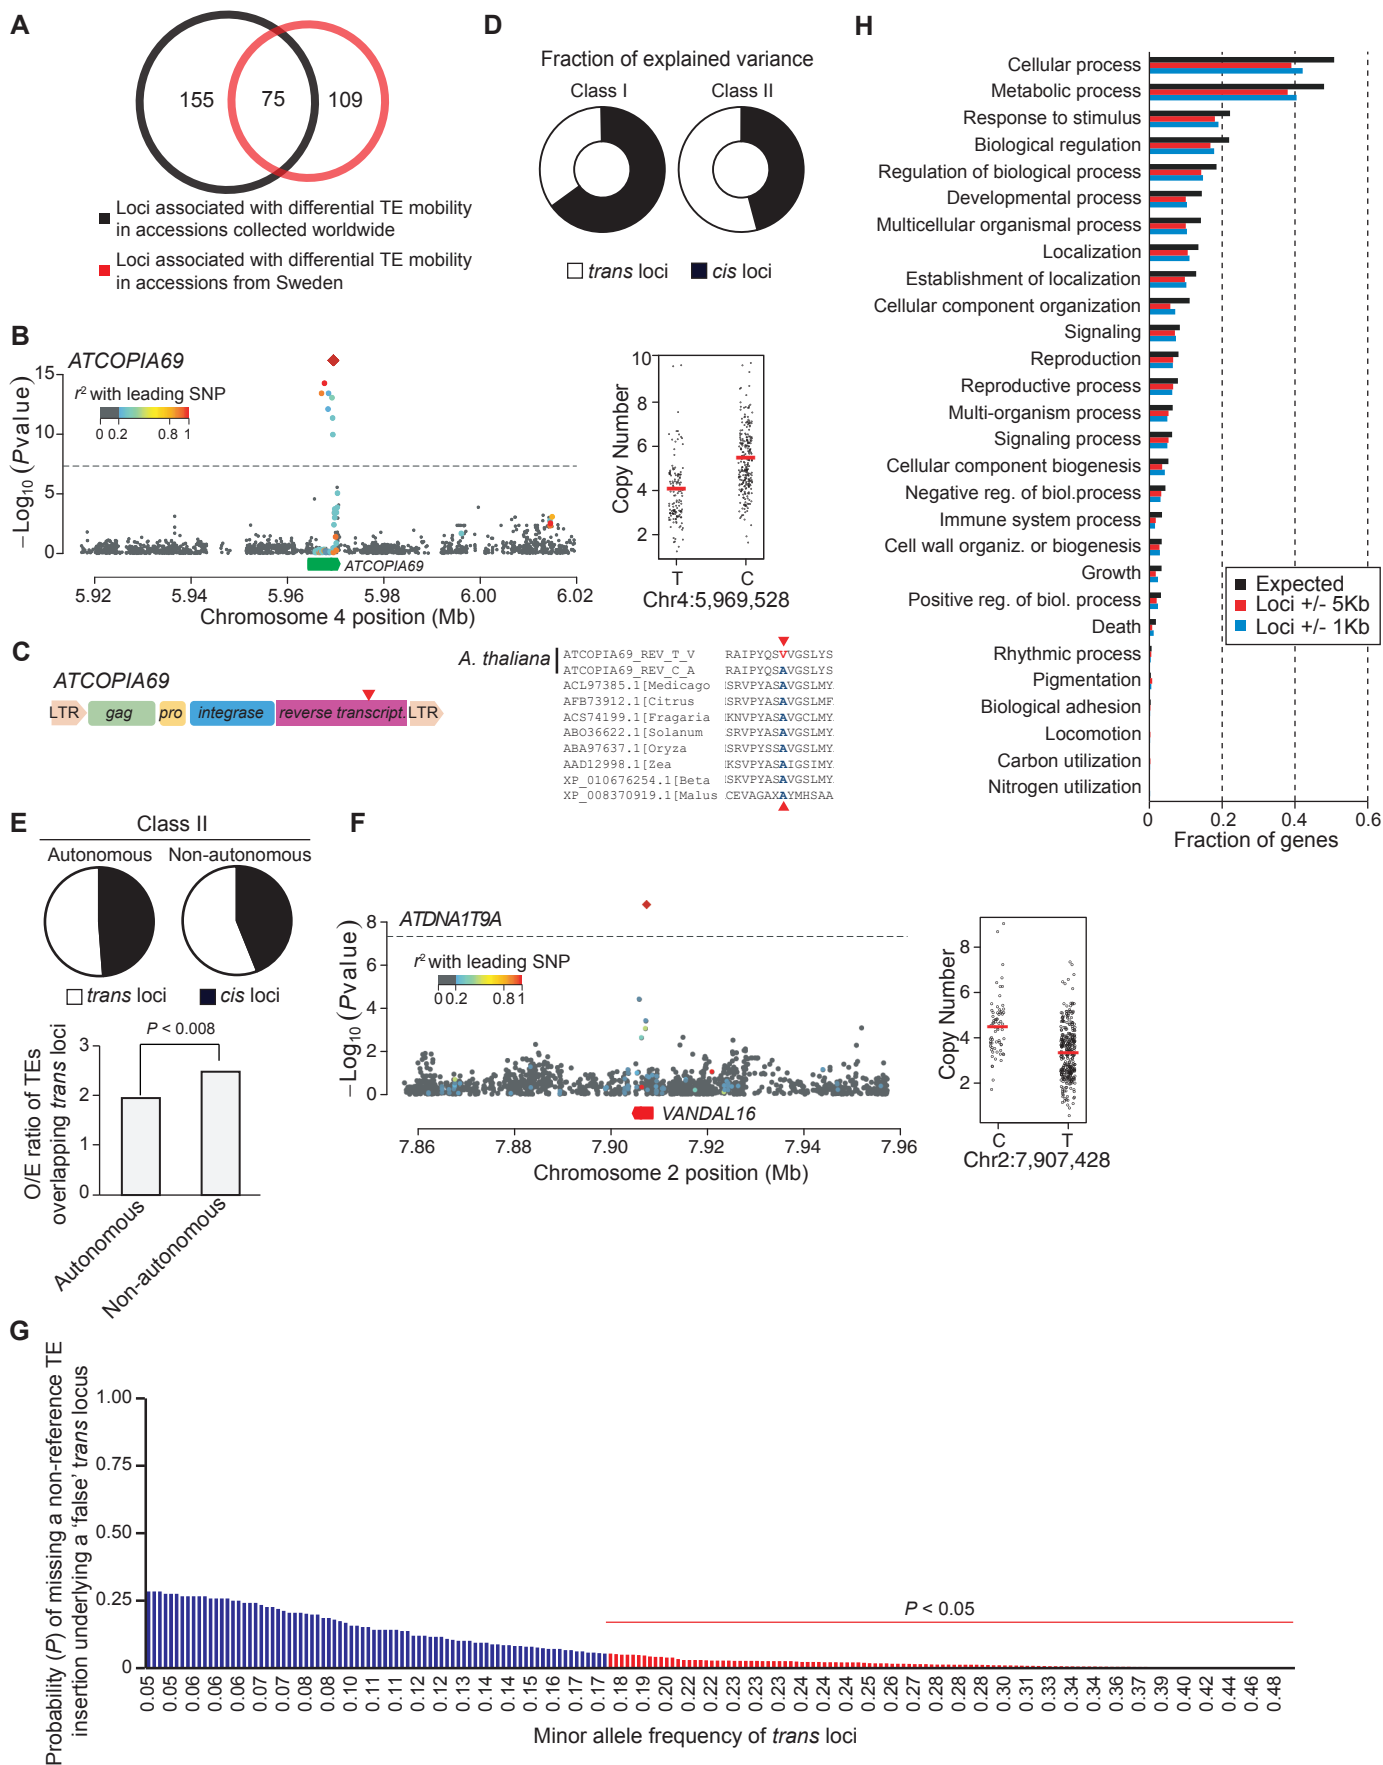

Supplement: supp [file elife-15716-supp-v1.zip › elife_poa_e15716_Figure_2_figure_supplement_3.pdf]

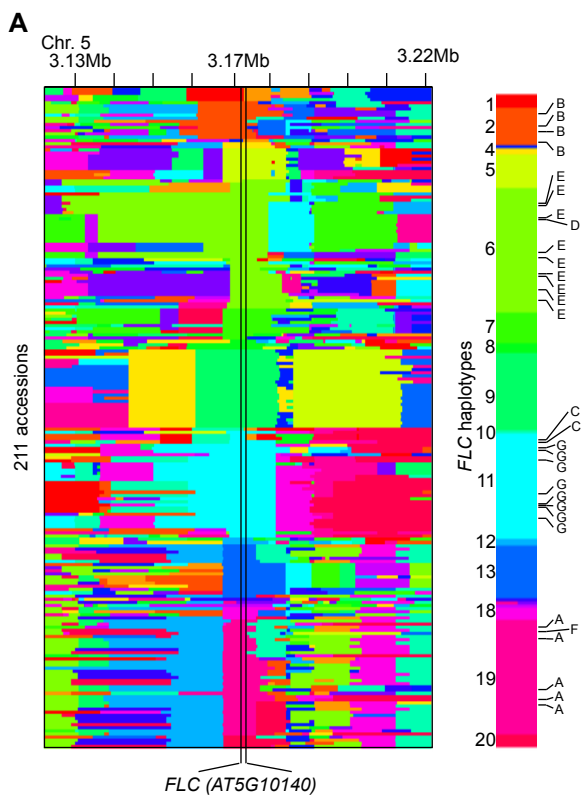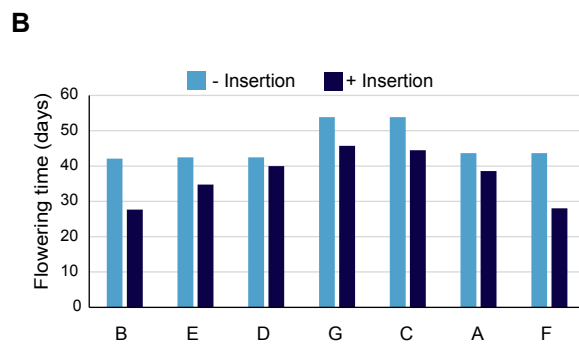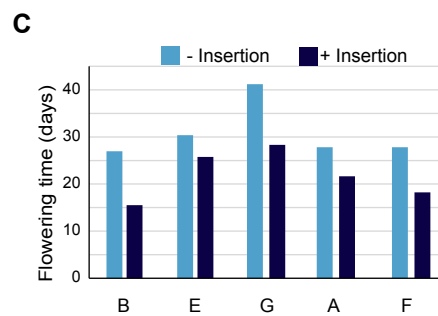

Supplement: supp [file elife-15716-supp-v1.zip › elife_poa_e15716_Figure_5_figure_supplement_1.pdf]

A

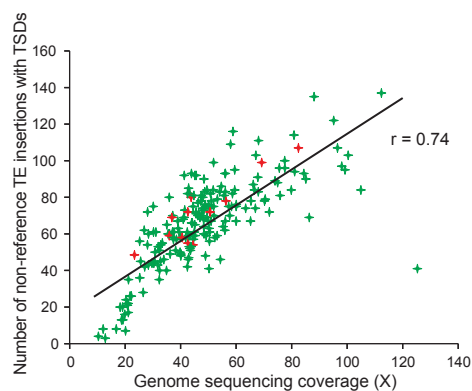

C

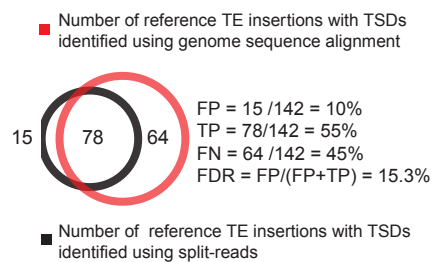

D

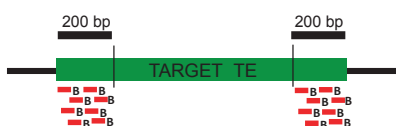

- 181 TE families
- 2.1 M probes
- 0.12 Mb (0.1 % of the genome)

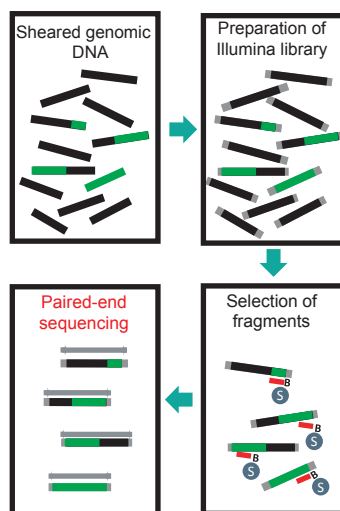

E

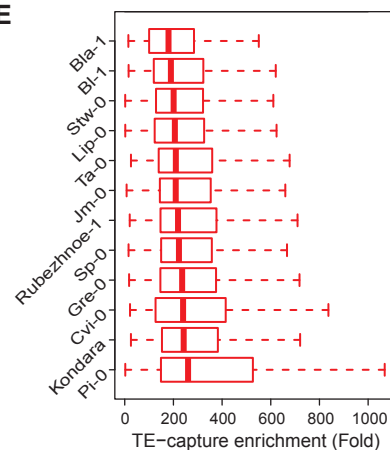

F

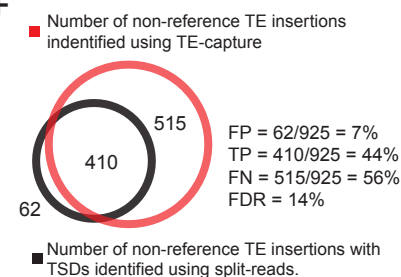

B

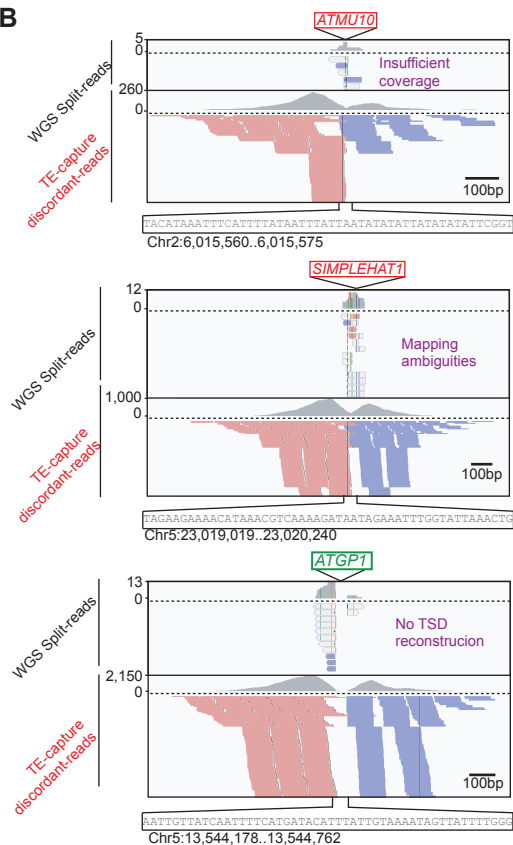

G

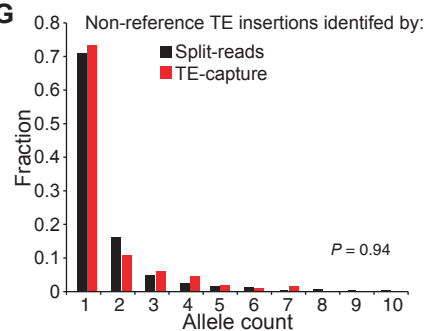

H

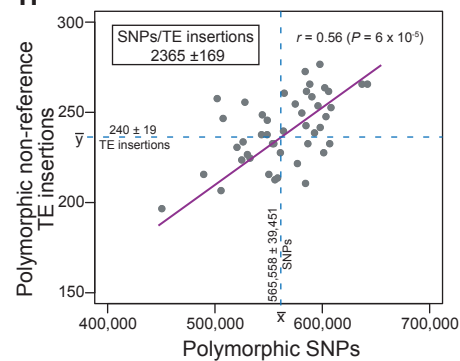

Supplement: supp [file elife-15716-supp-v1.zip › elife_poa_e15716_Figure_1_figure_supplement_1.pdf]

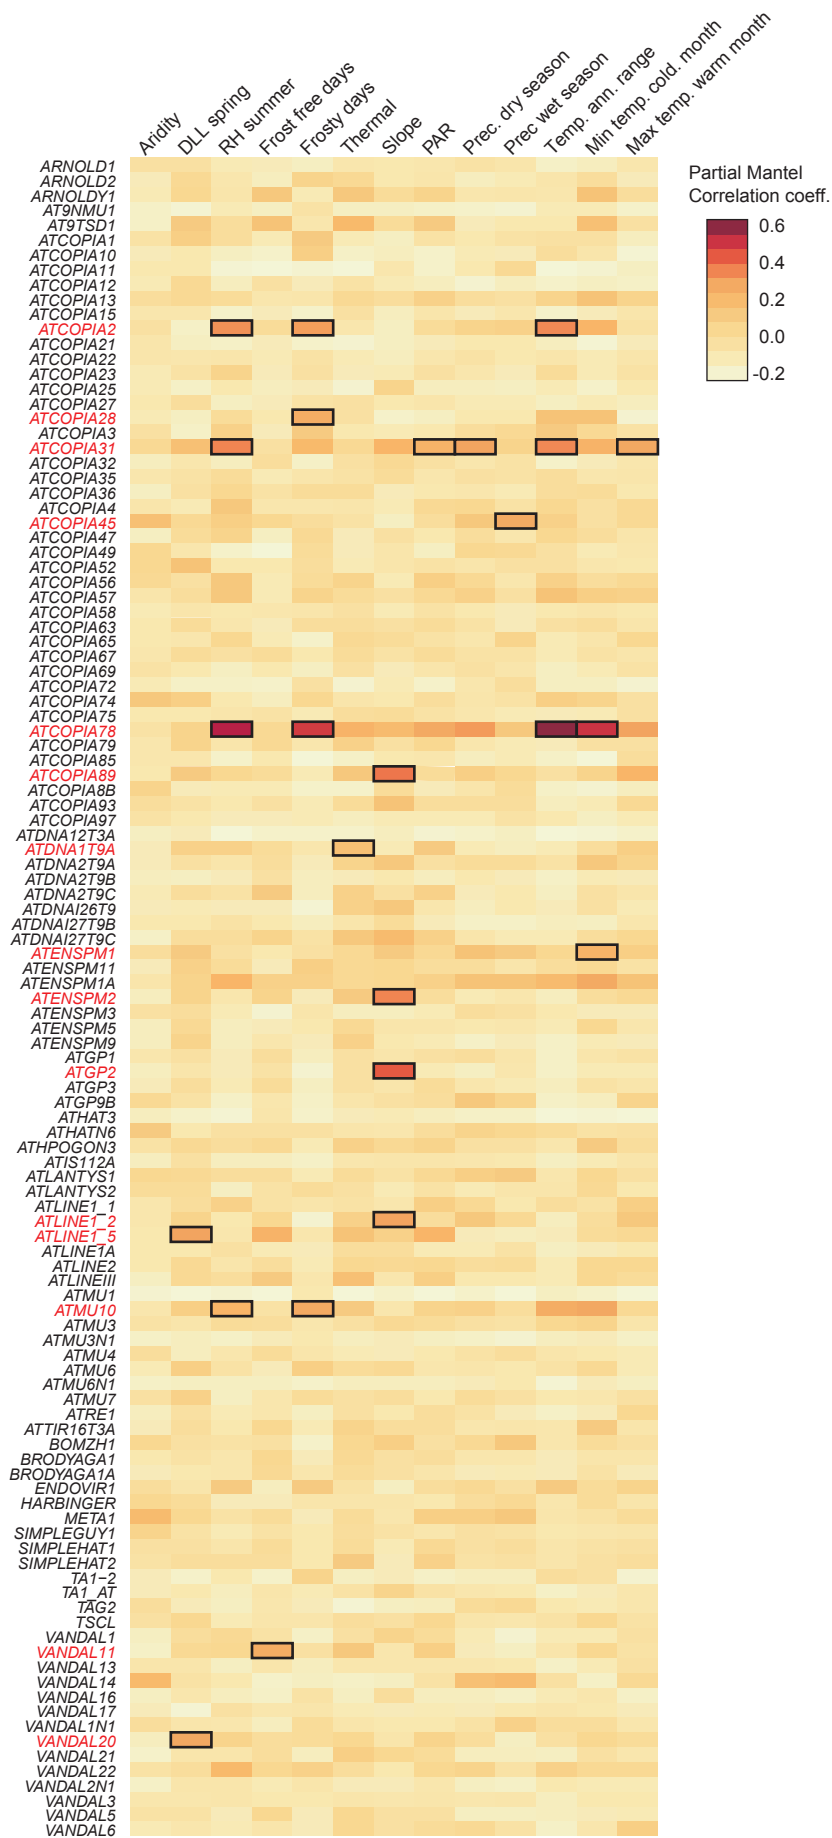

Supplement: supp [file elife-15716-supp-v1.zip › elife_poa_e15716_Figure_2_figure_supplement_2.pdf]

# Supplementary file 2. DNA sequence motifs at insertions sites

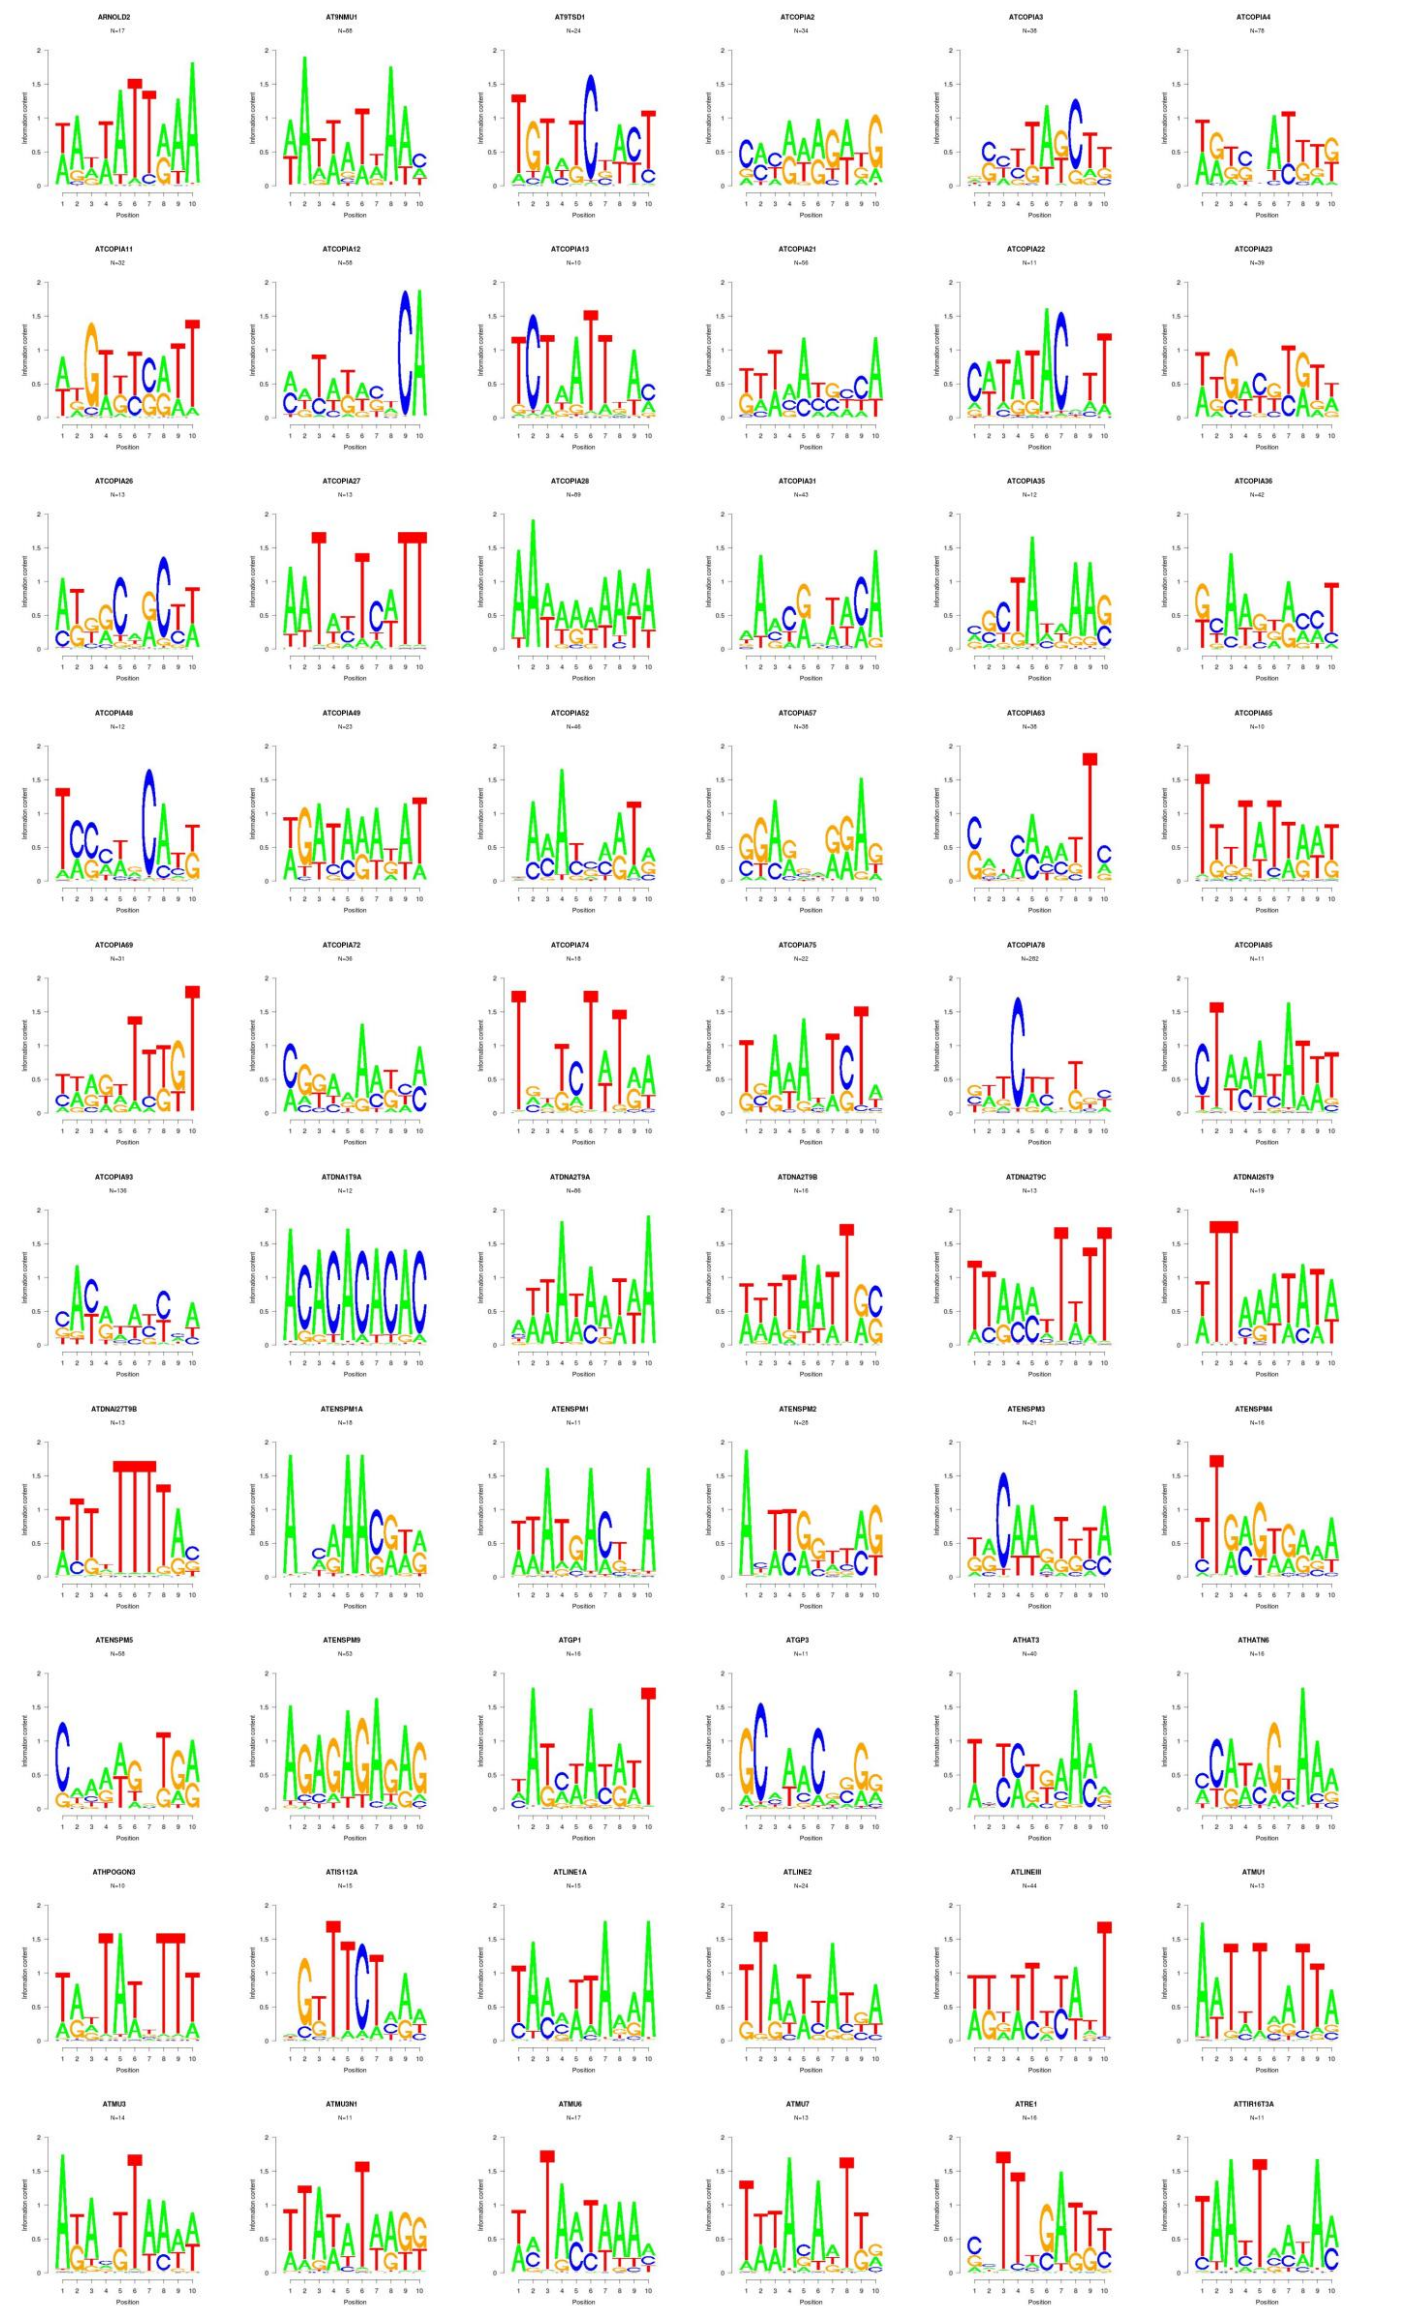

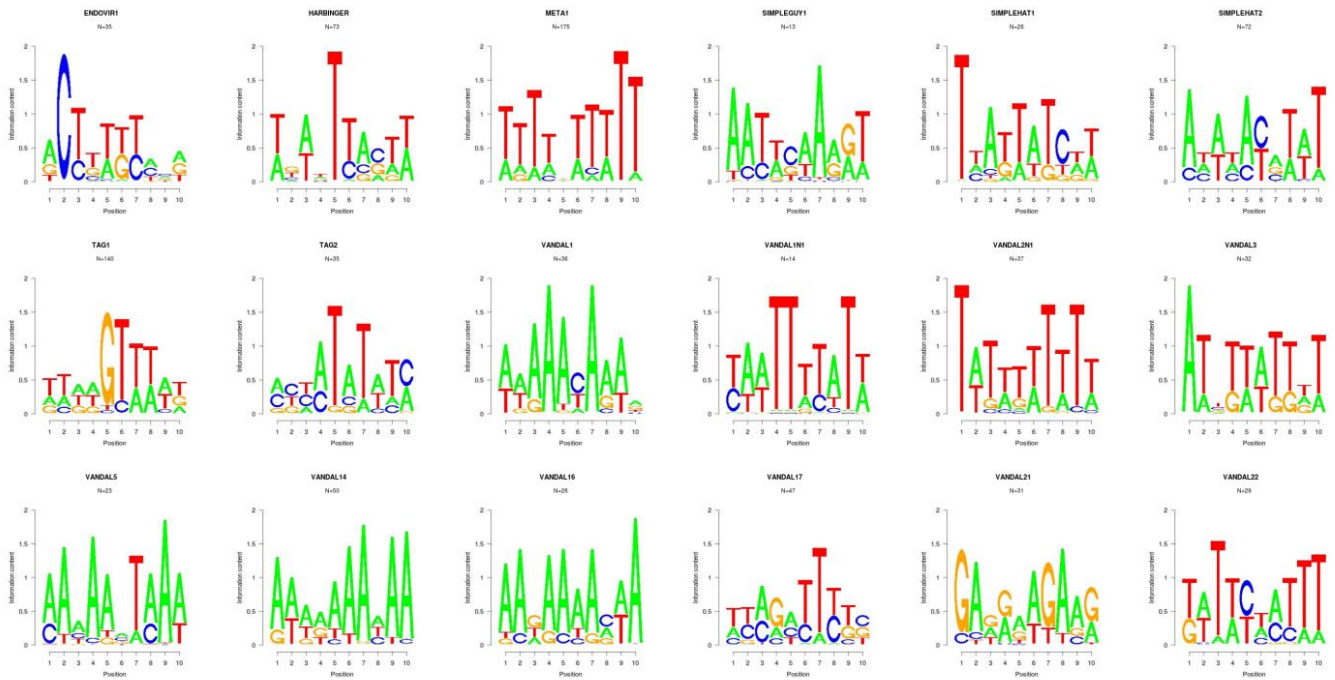

Supplement: supp [file elife-15716-supp-v1.zip › elife_poa_e15716_Supplementary_File_2.pdf]
